# Supplementary material for: A genomic survey of the fish parasite Spironucleus salmonicida indicates genomic plasticity among diplomonads and significant lateral gene transfer in eukaryote genome evolution
Source: PubMed Central journal article supplement (PMC1805757; doi:10.1186/1471-2164-8-51), 2007-02-14

**Additional file 4 - Andersson et al.**

Phylogenetic trees 1-25 for genes putatively involved in LGT events and listed in Additional file 3.

Tree #1: SpESTZap1389

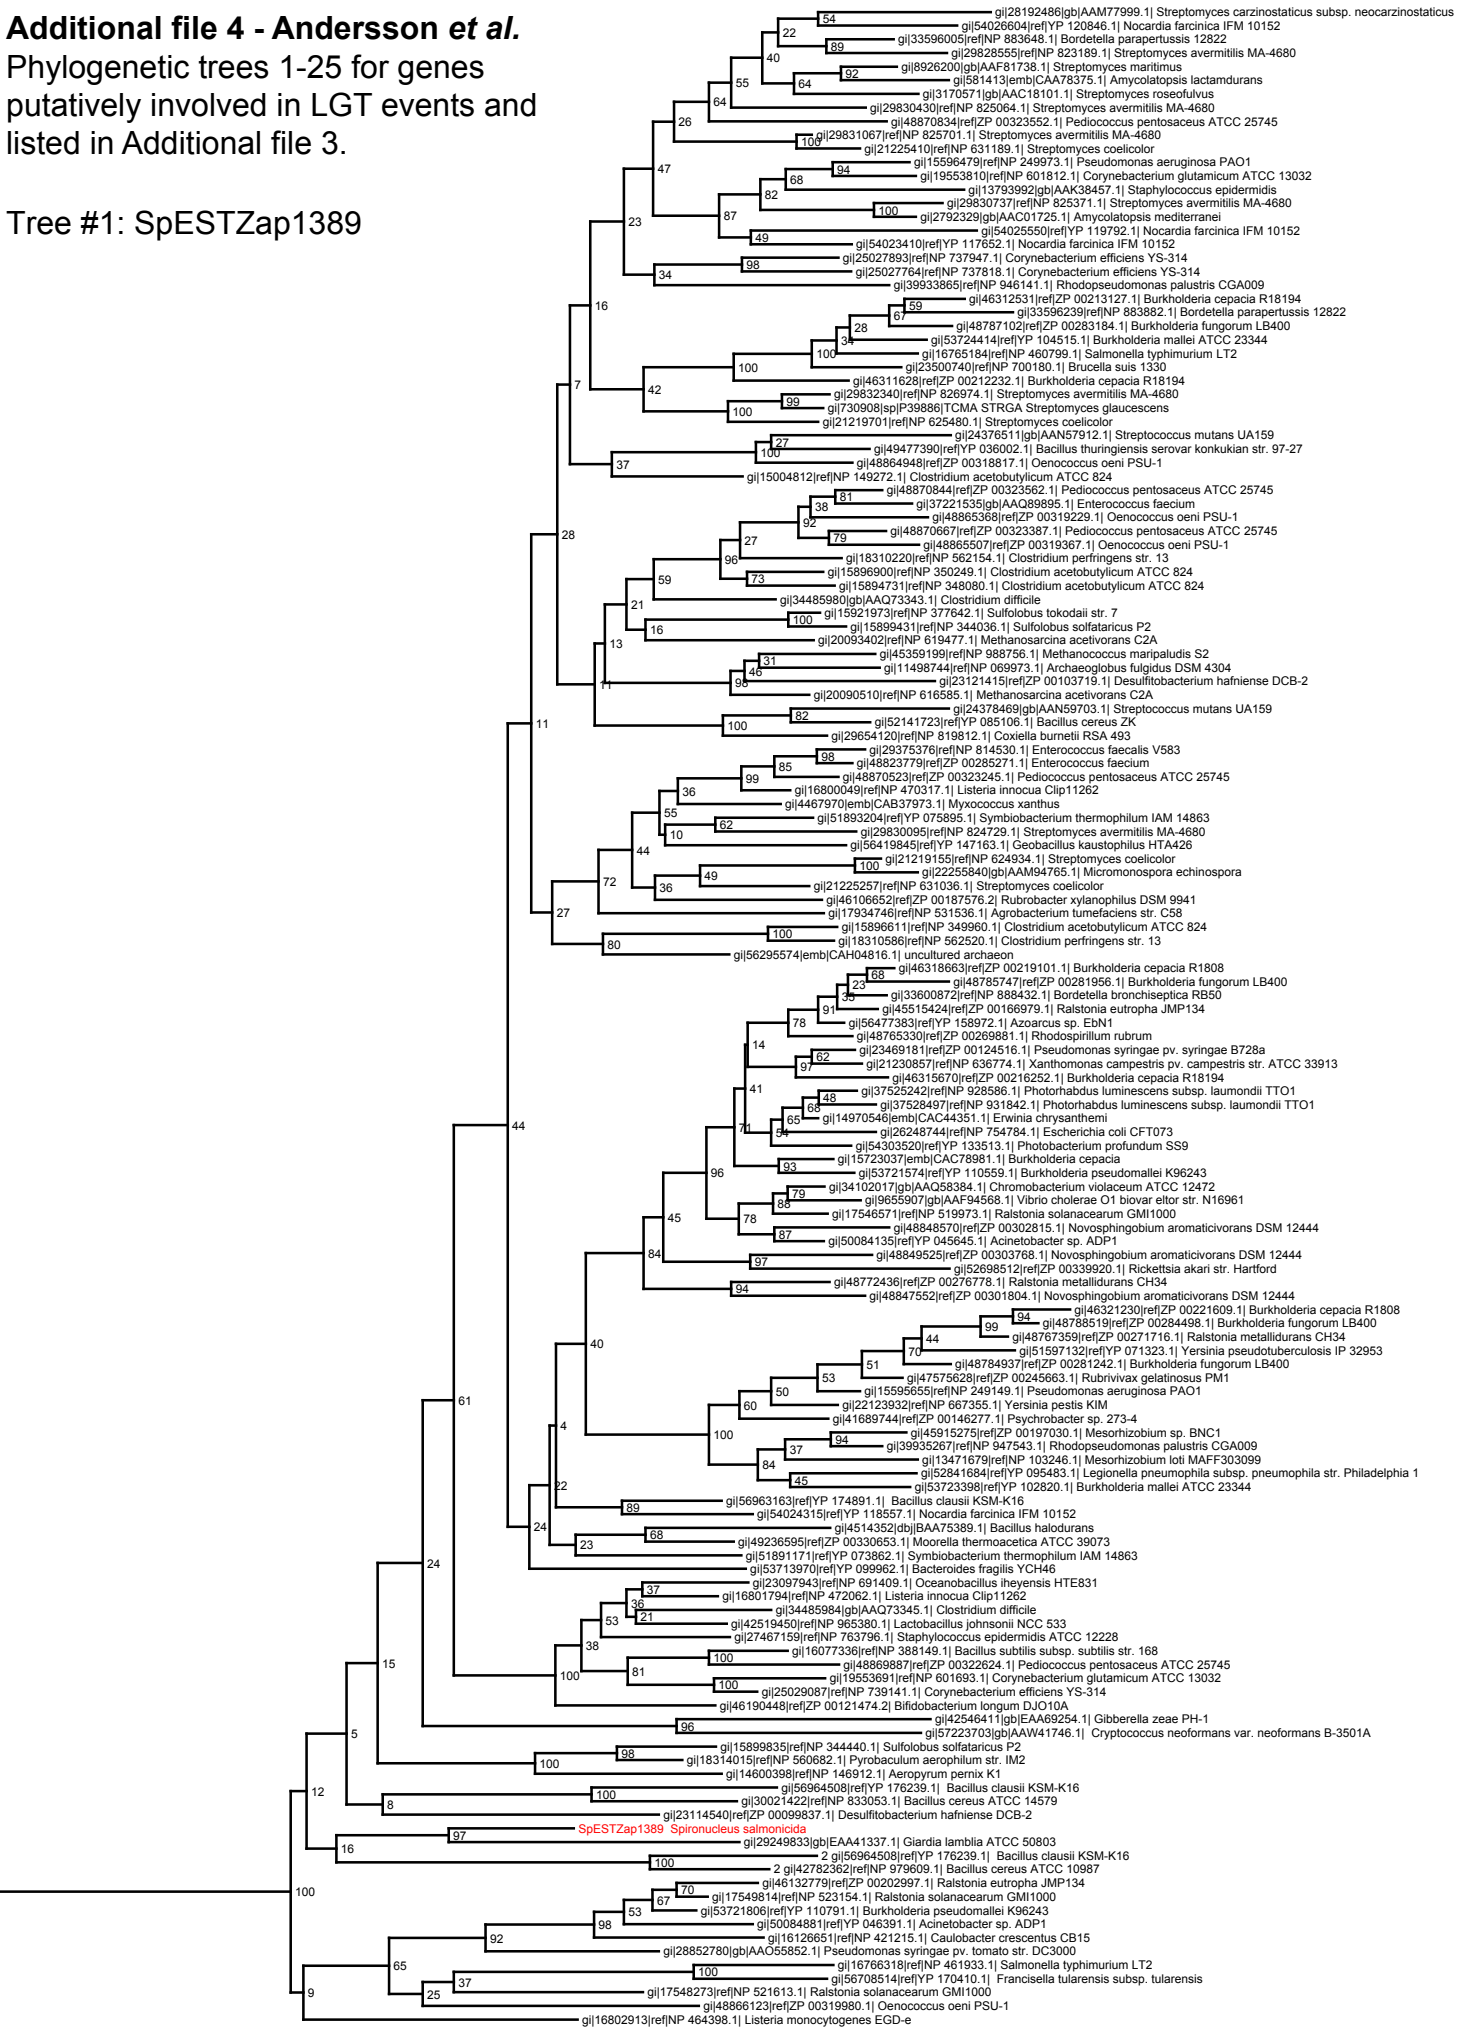

Tree #2: SpESTC18

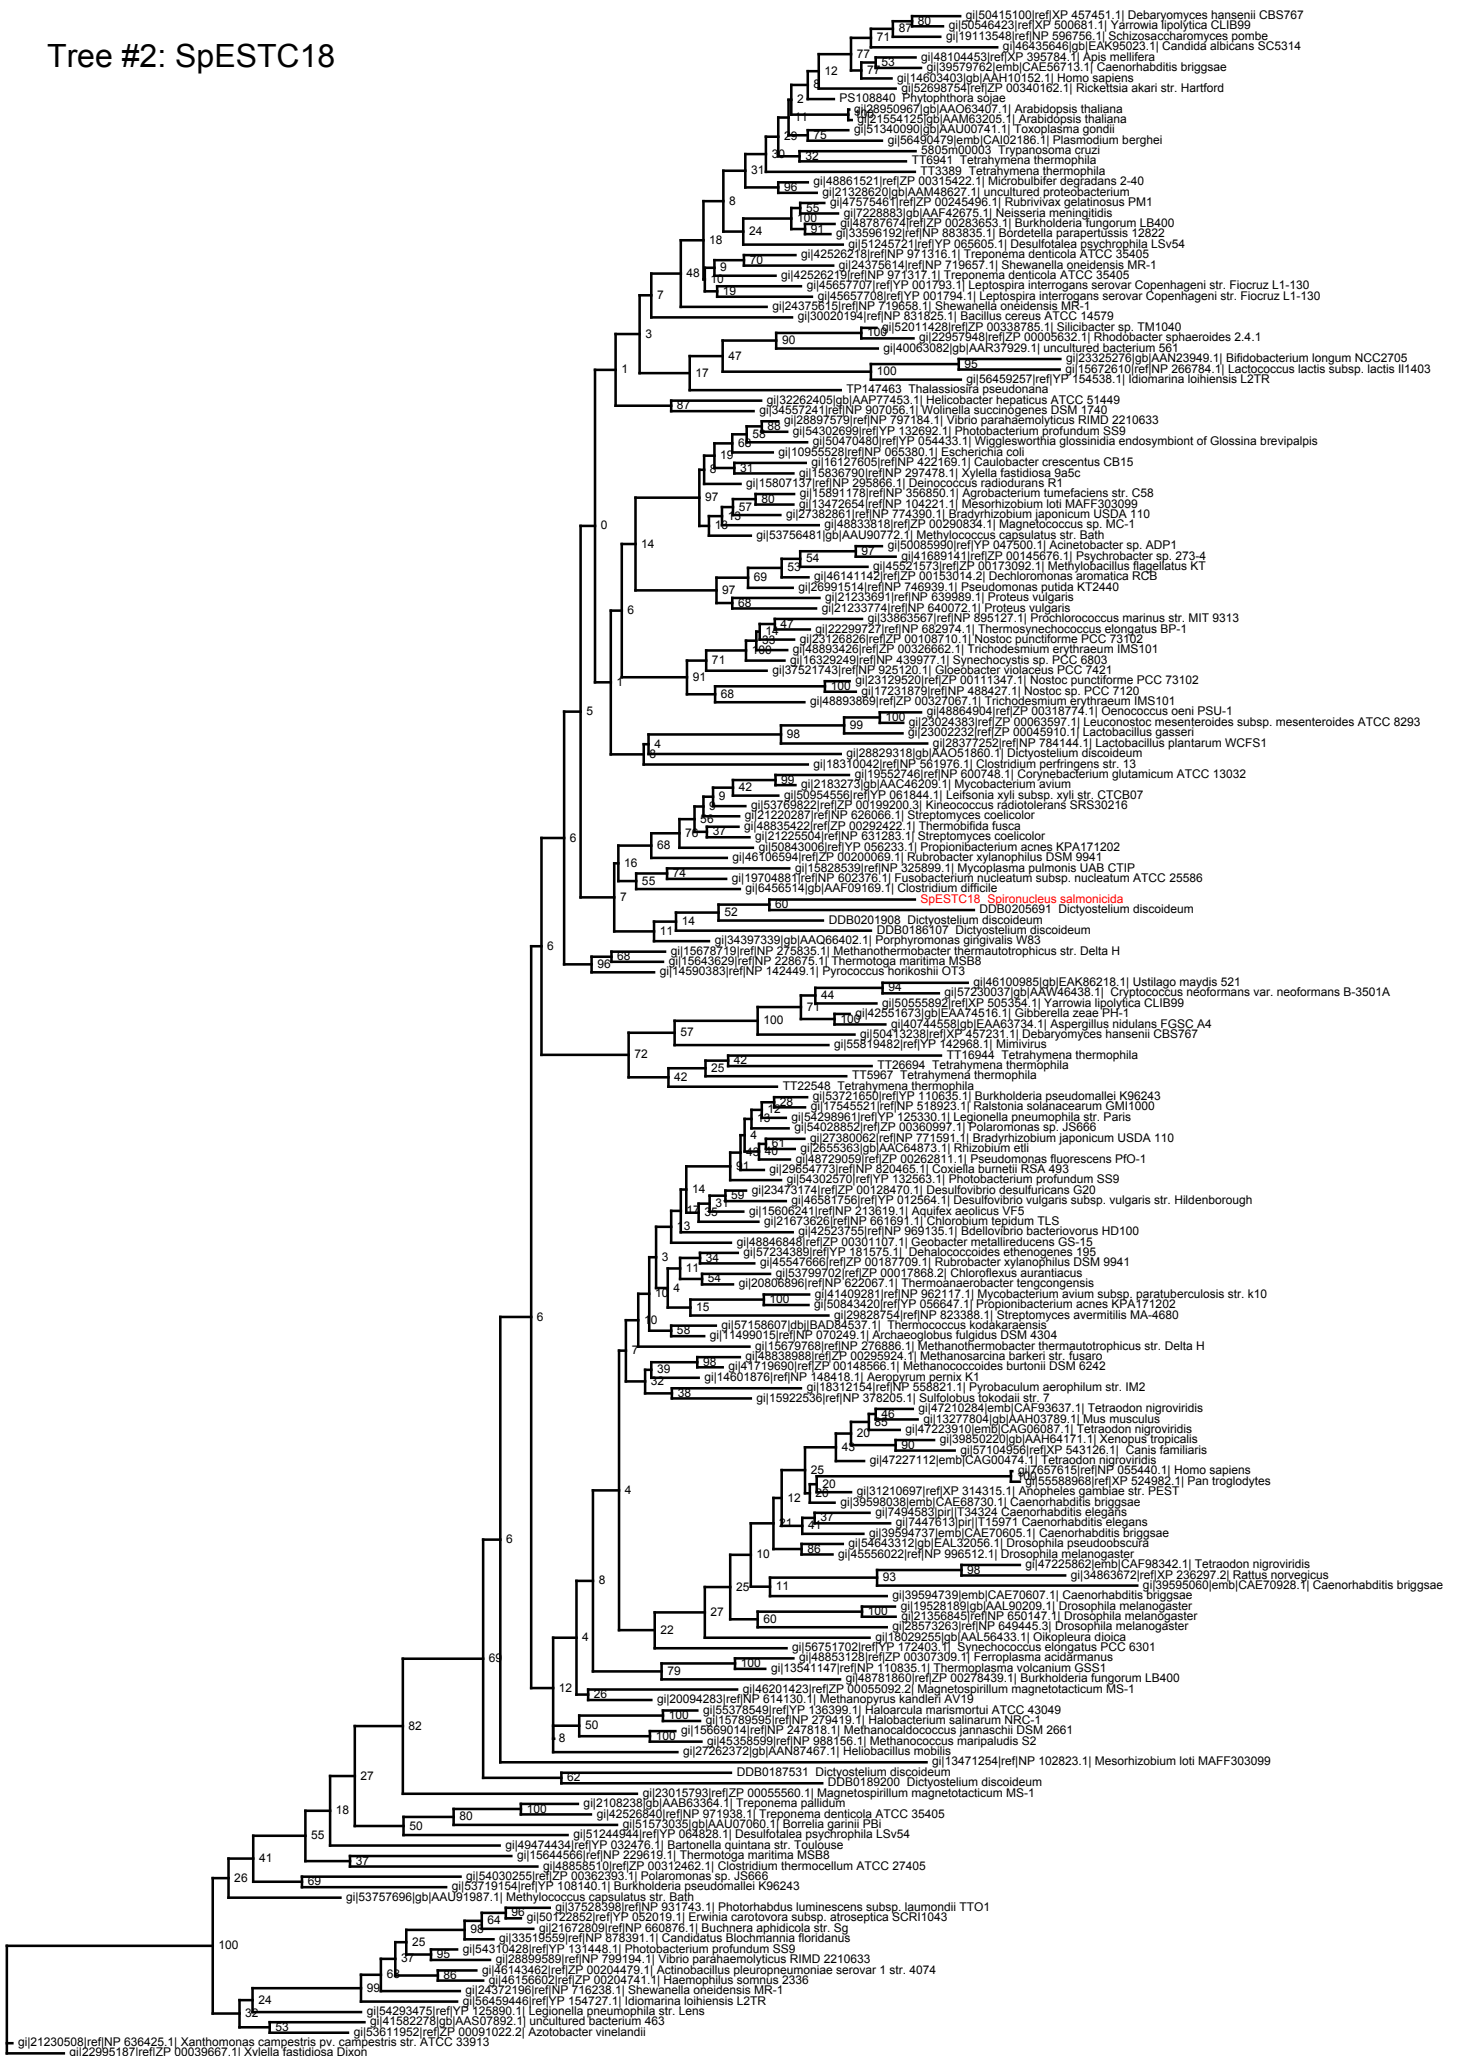

Tree #3: gZar958bT7

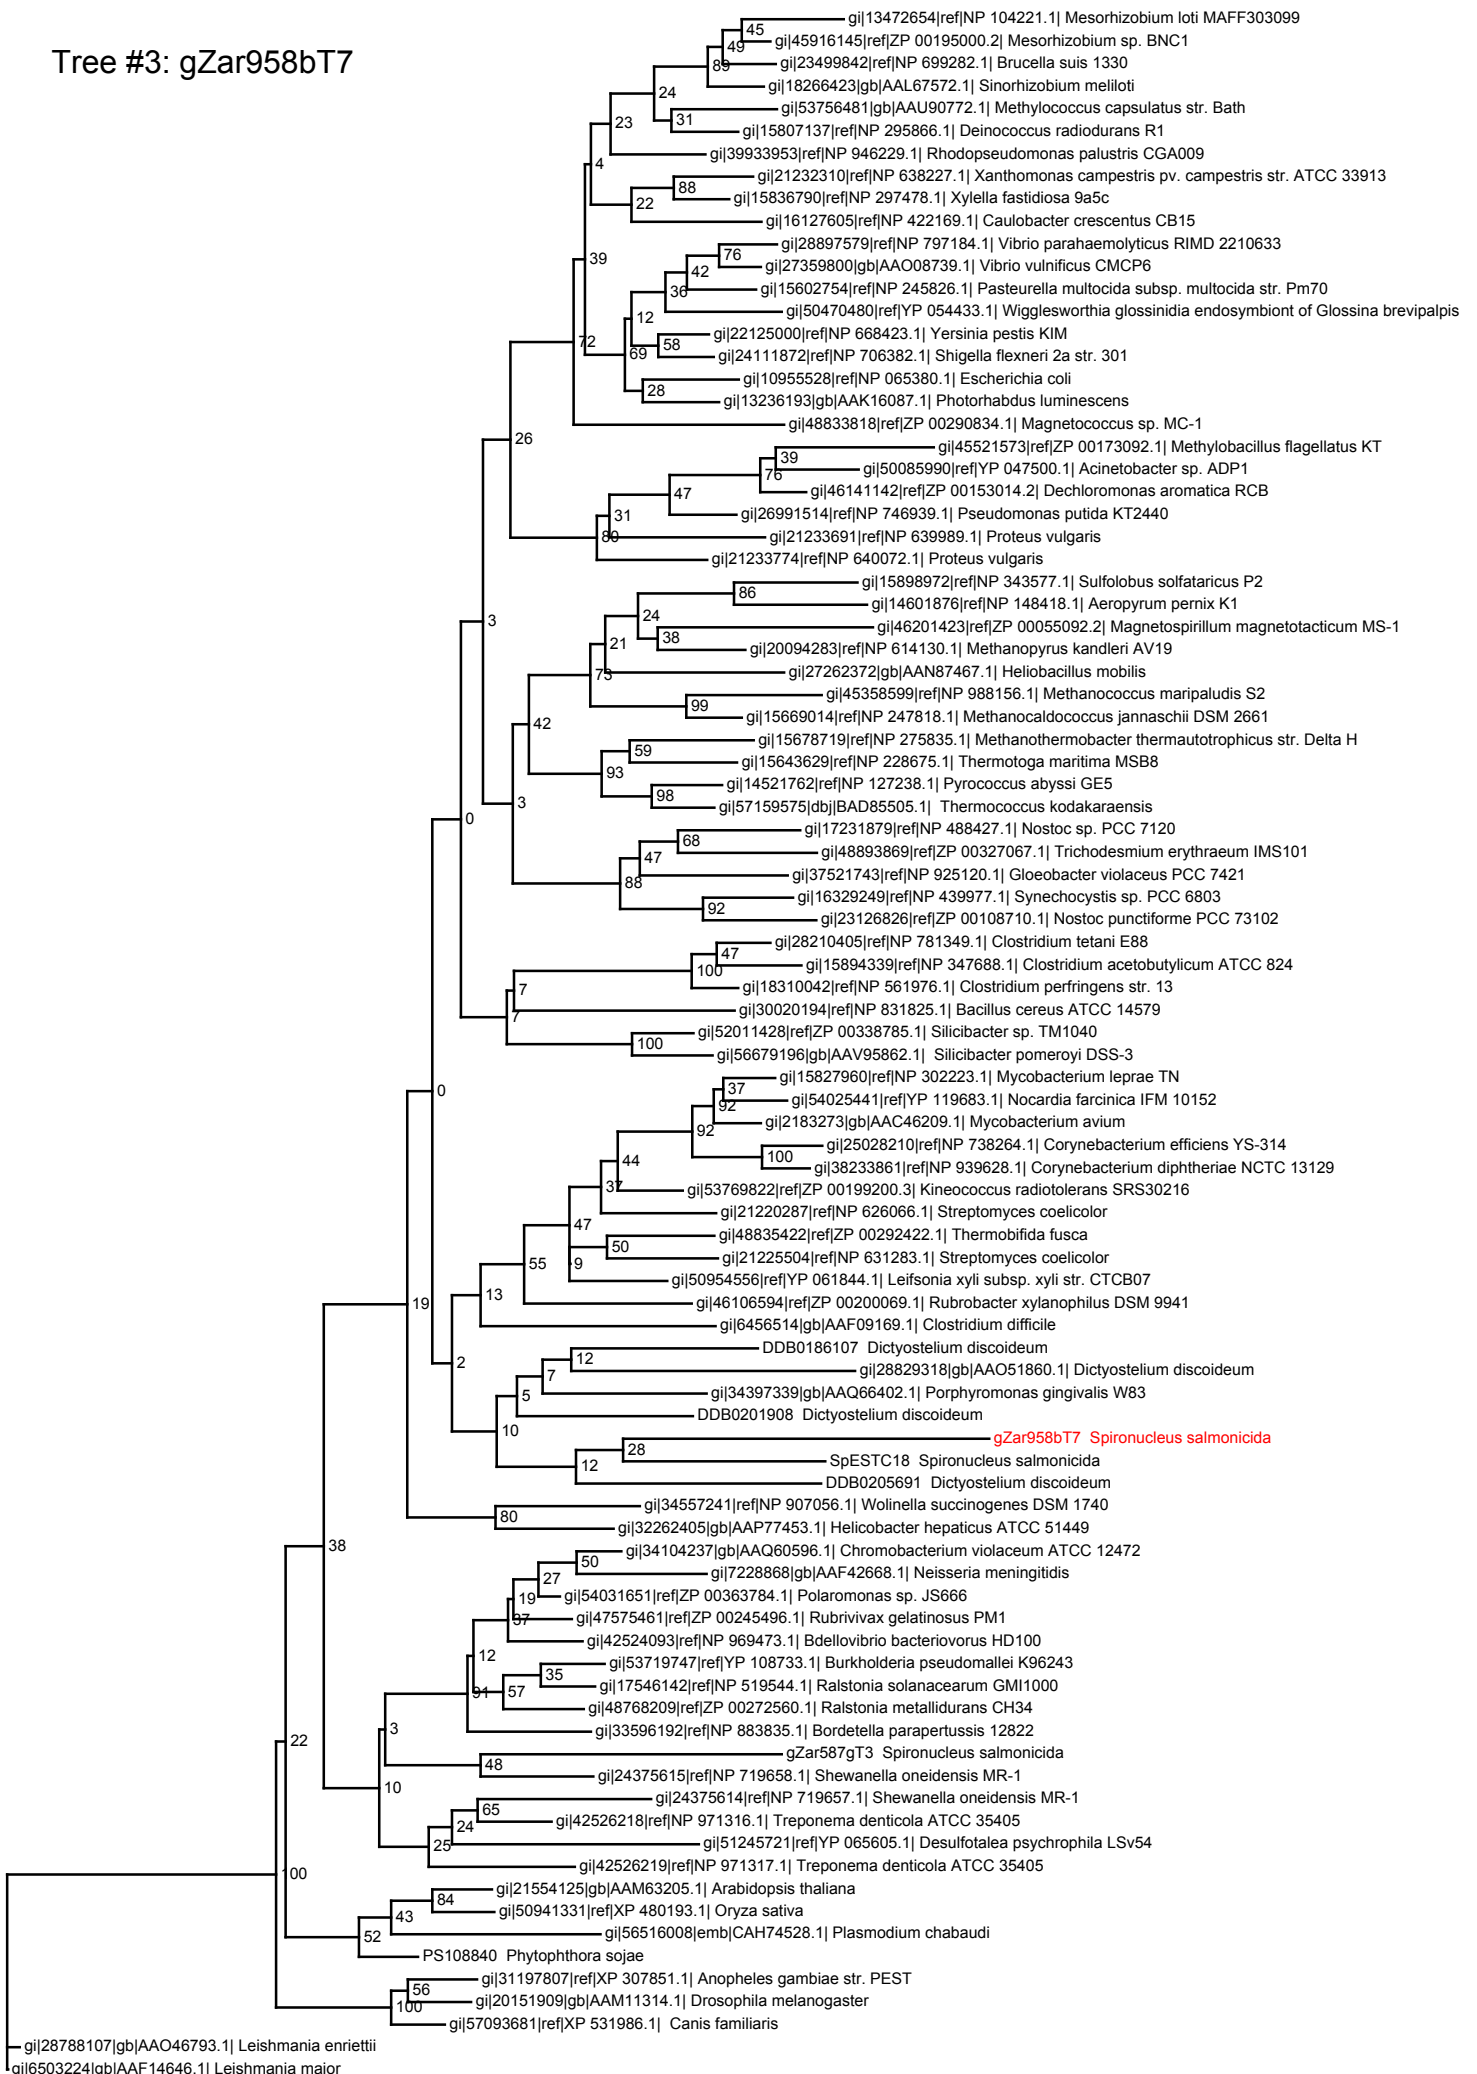

Tree #4: SpESTC43

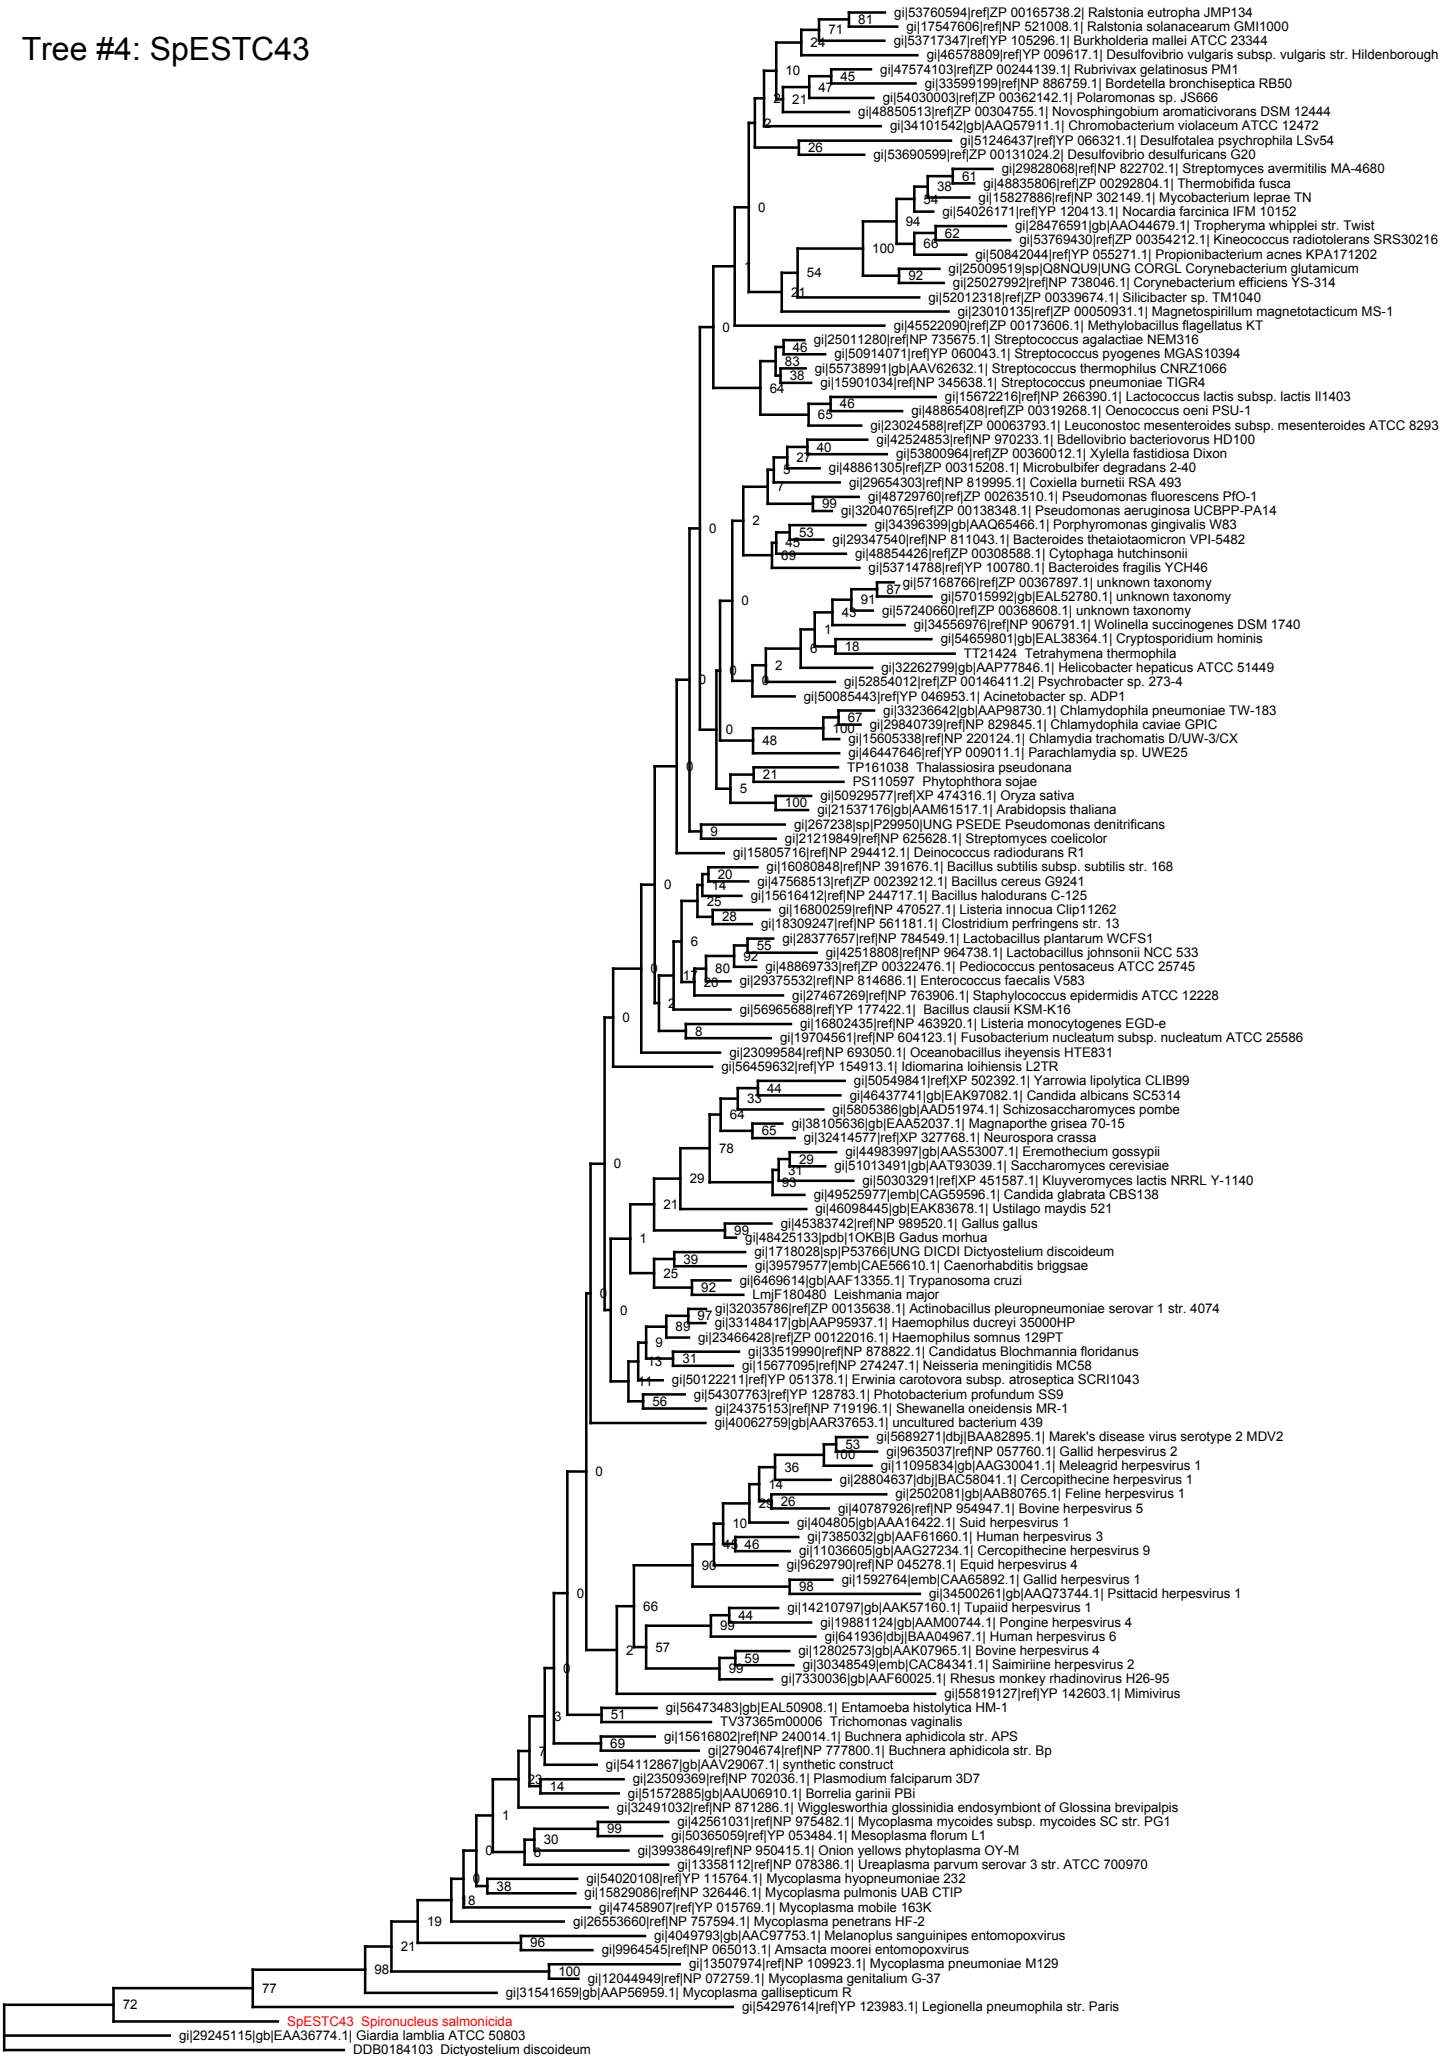



Tree #5: SpESTZap1340

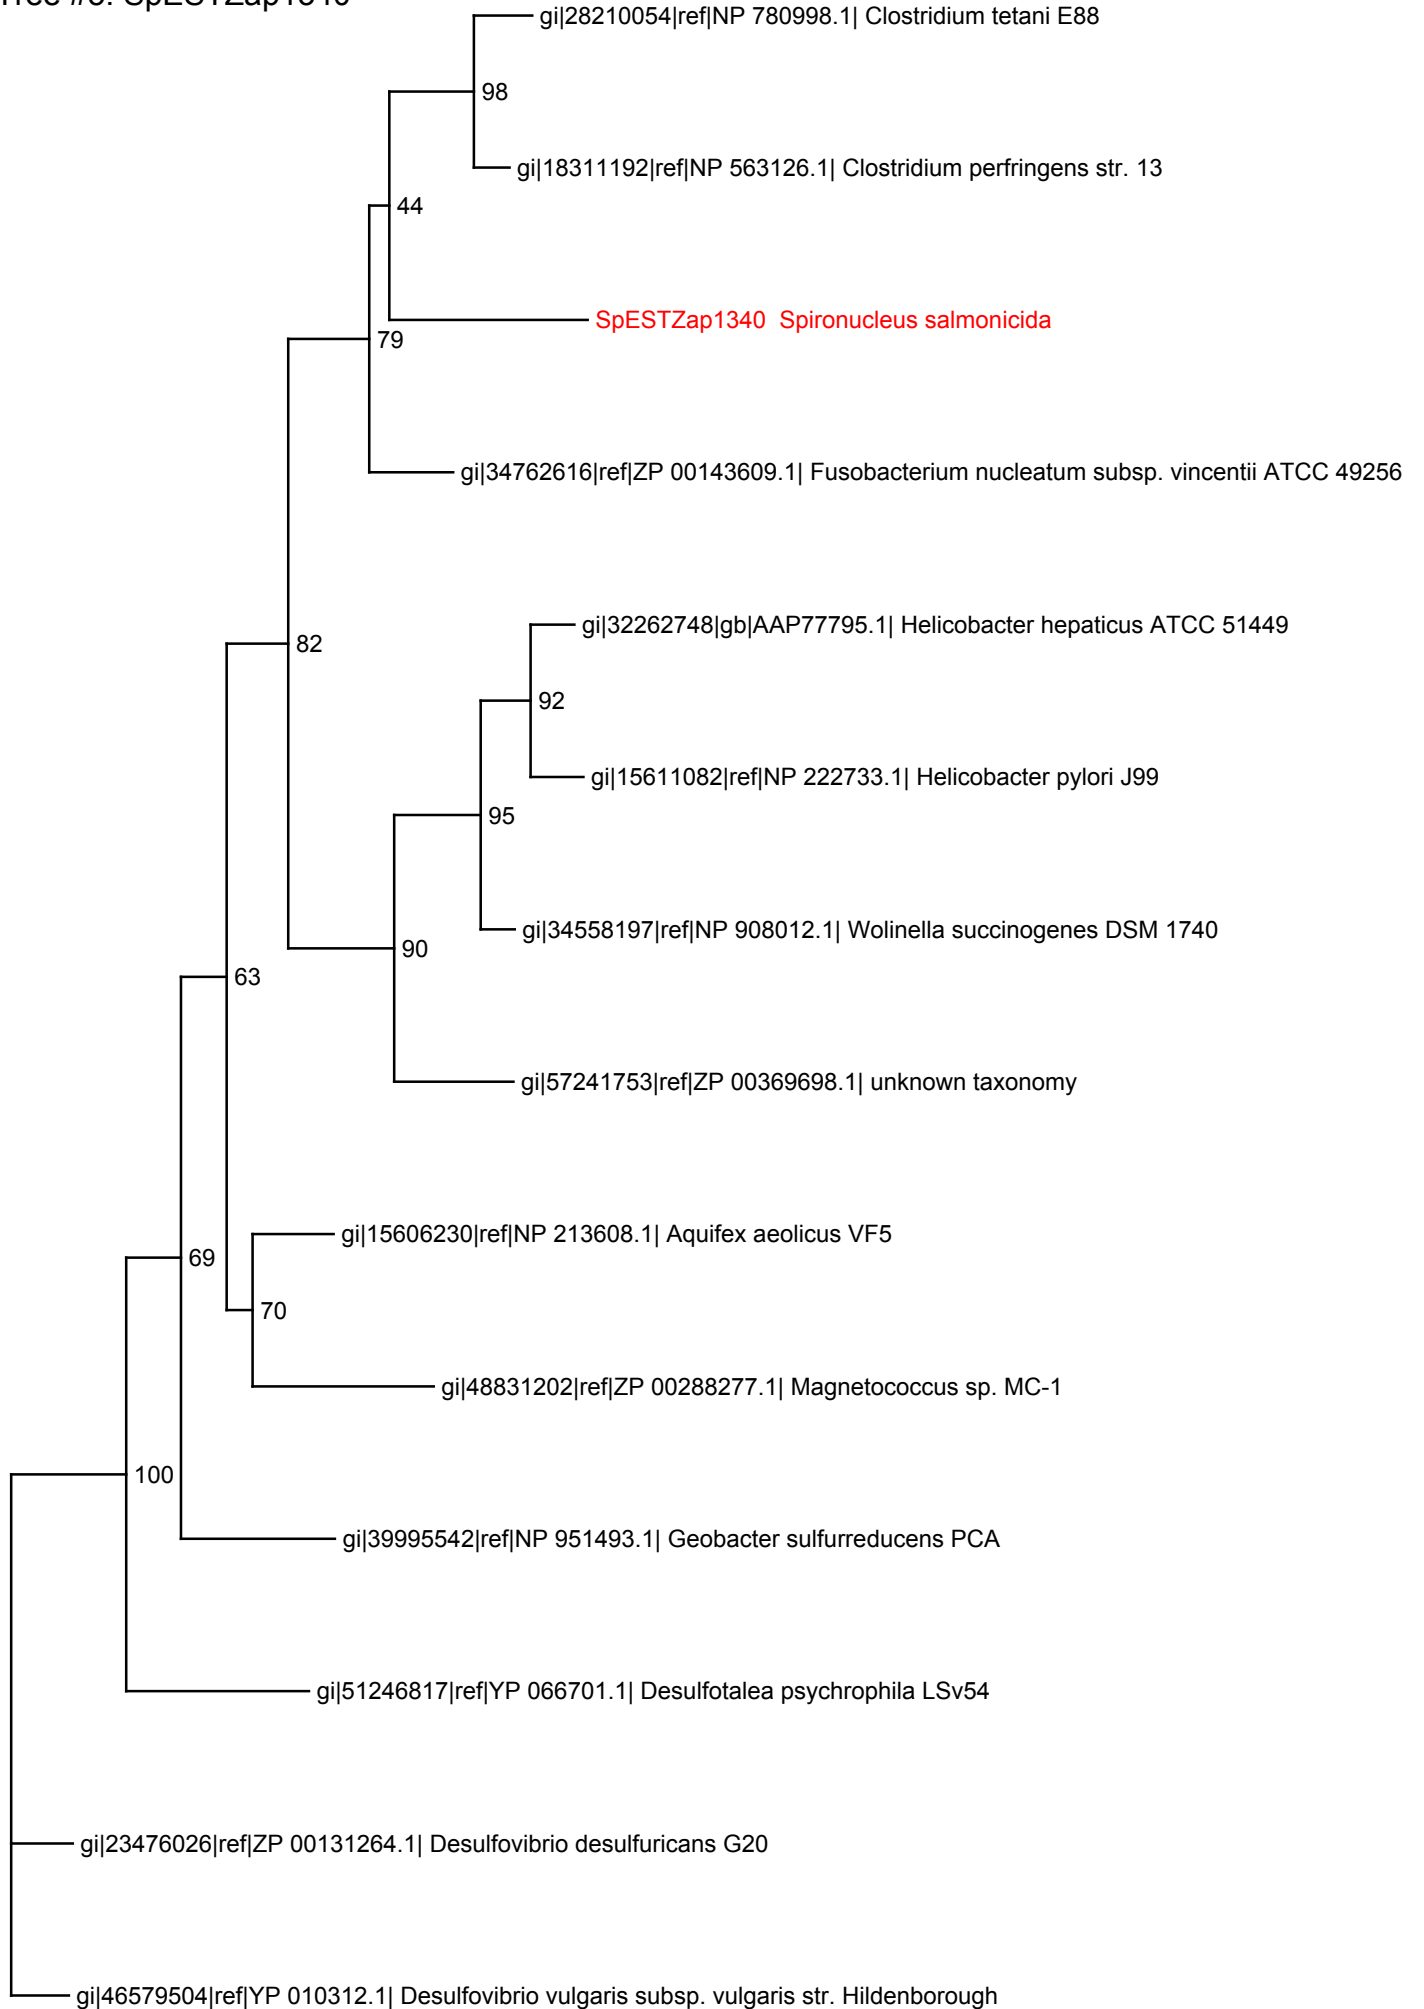

Tree #: 27982008

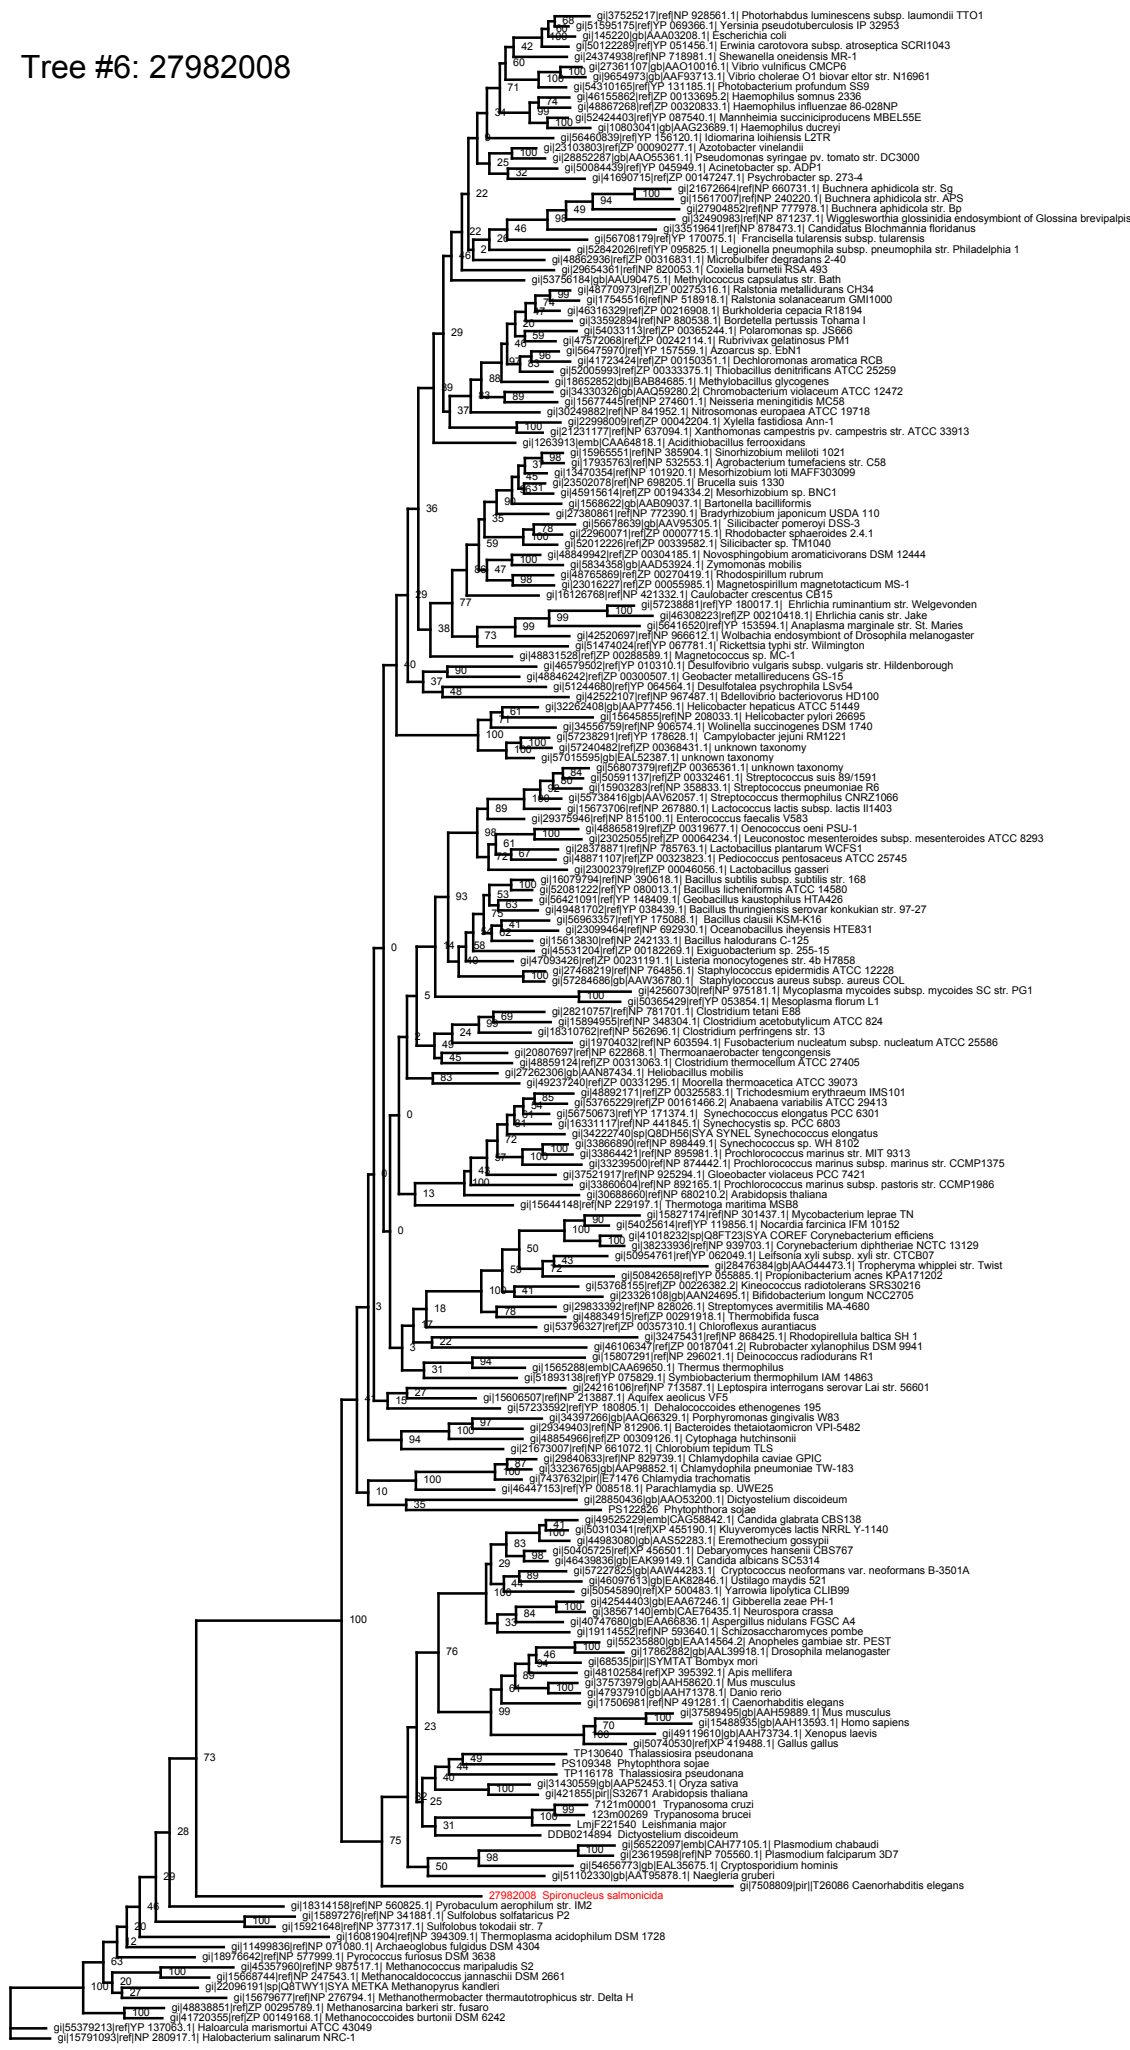

Tree #7: SpESTZap149,  
SpESTDH287,  
SpESTC149

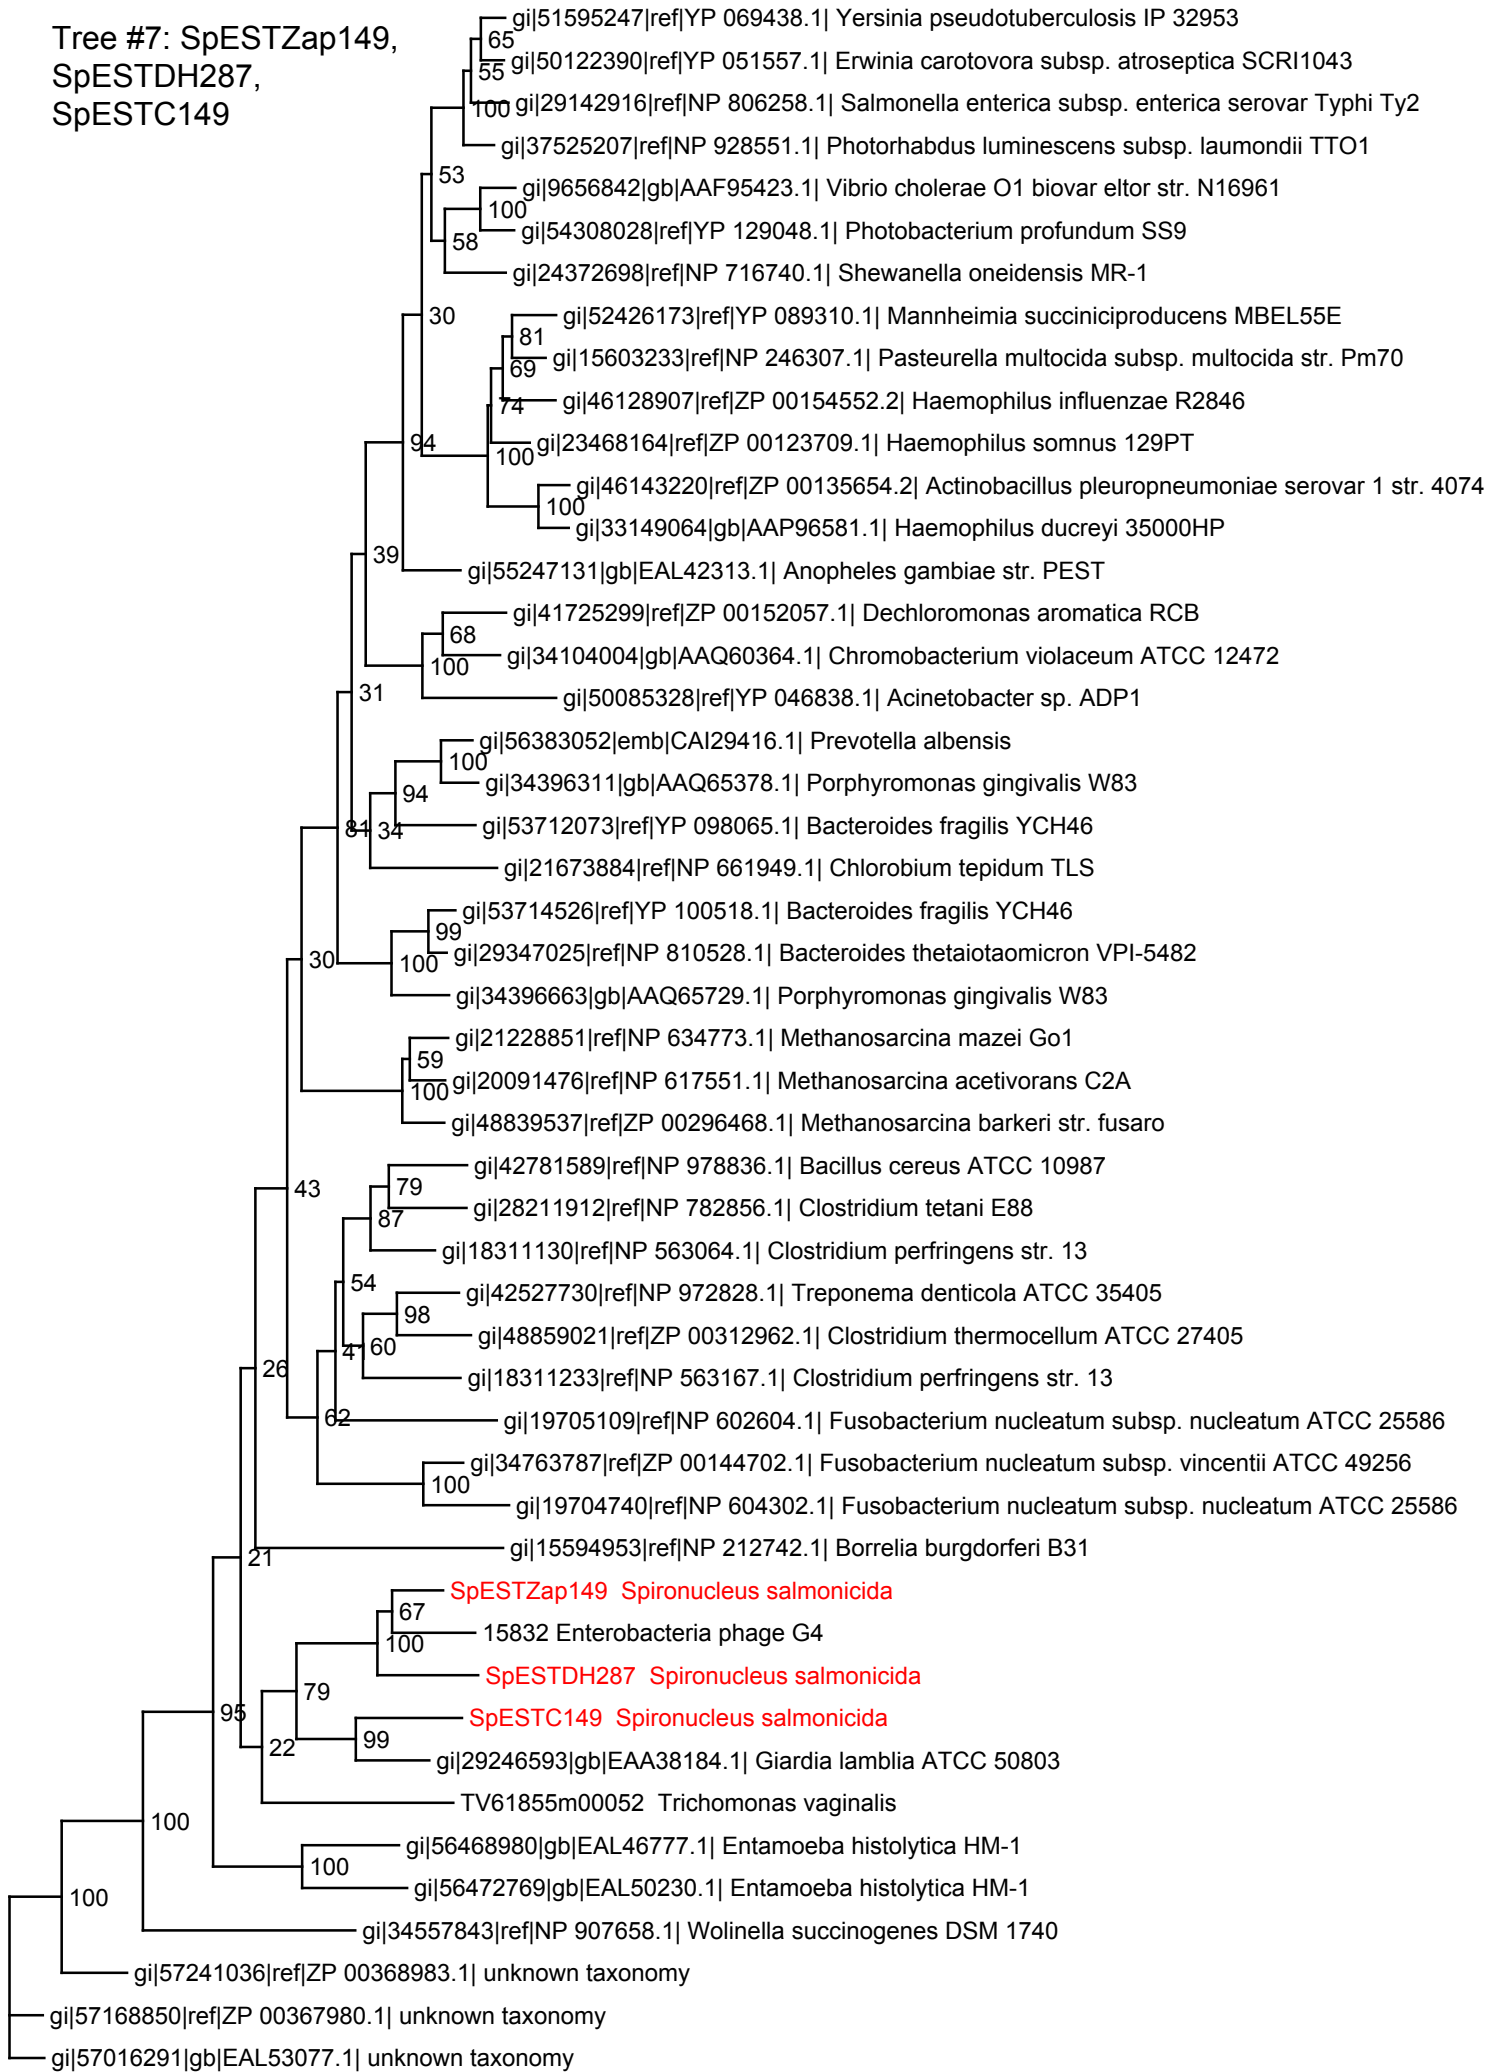

Tree #8: SpESTC31

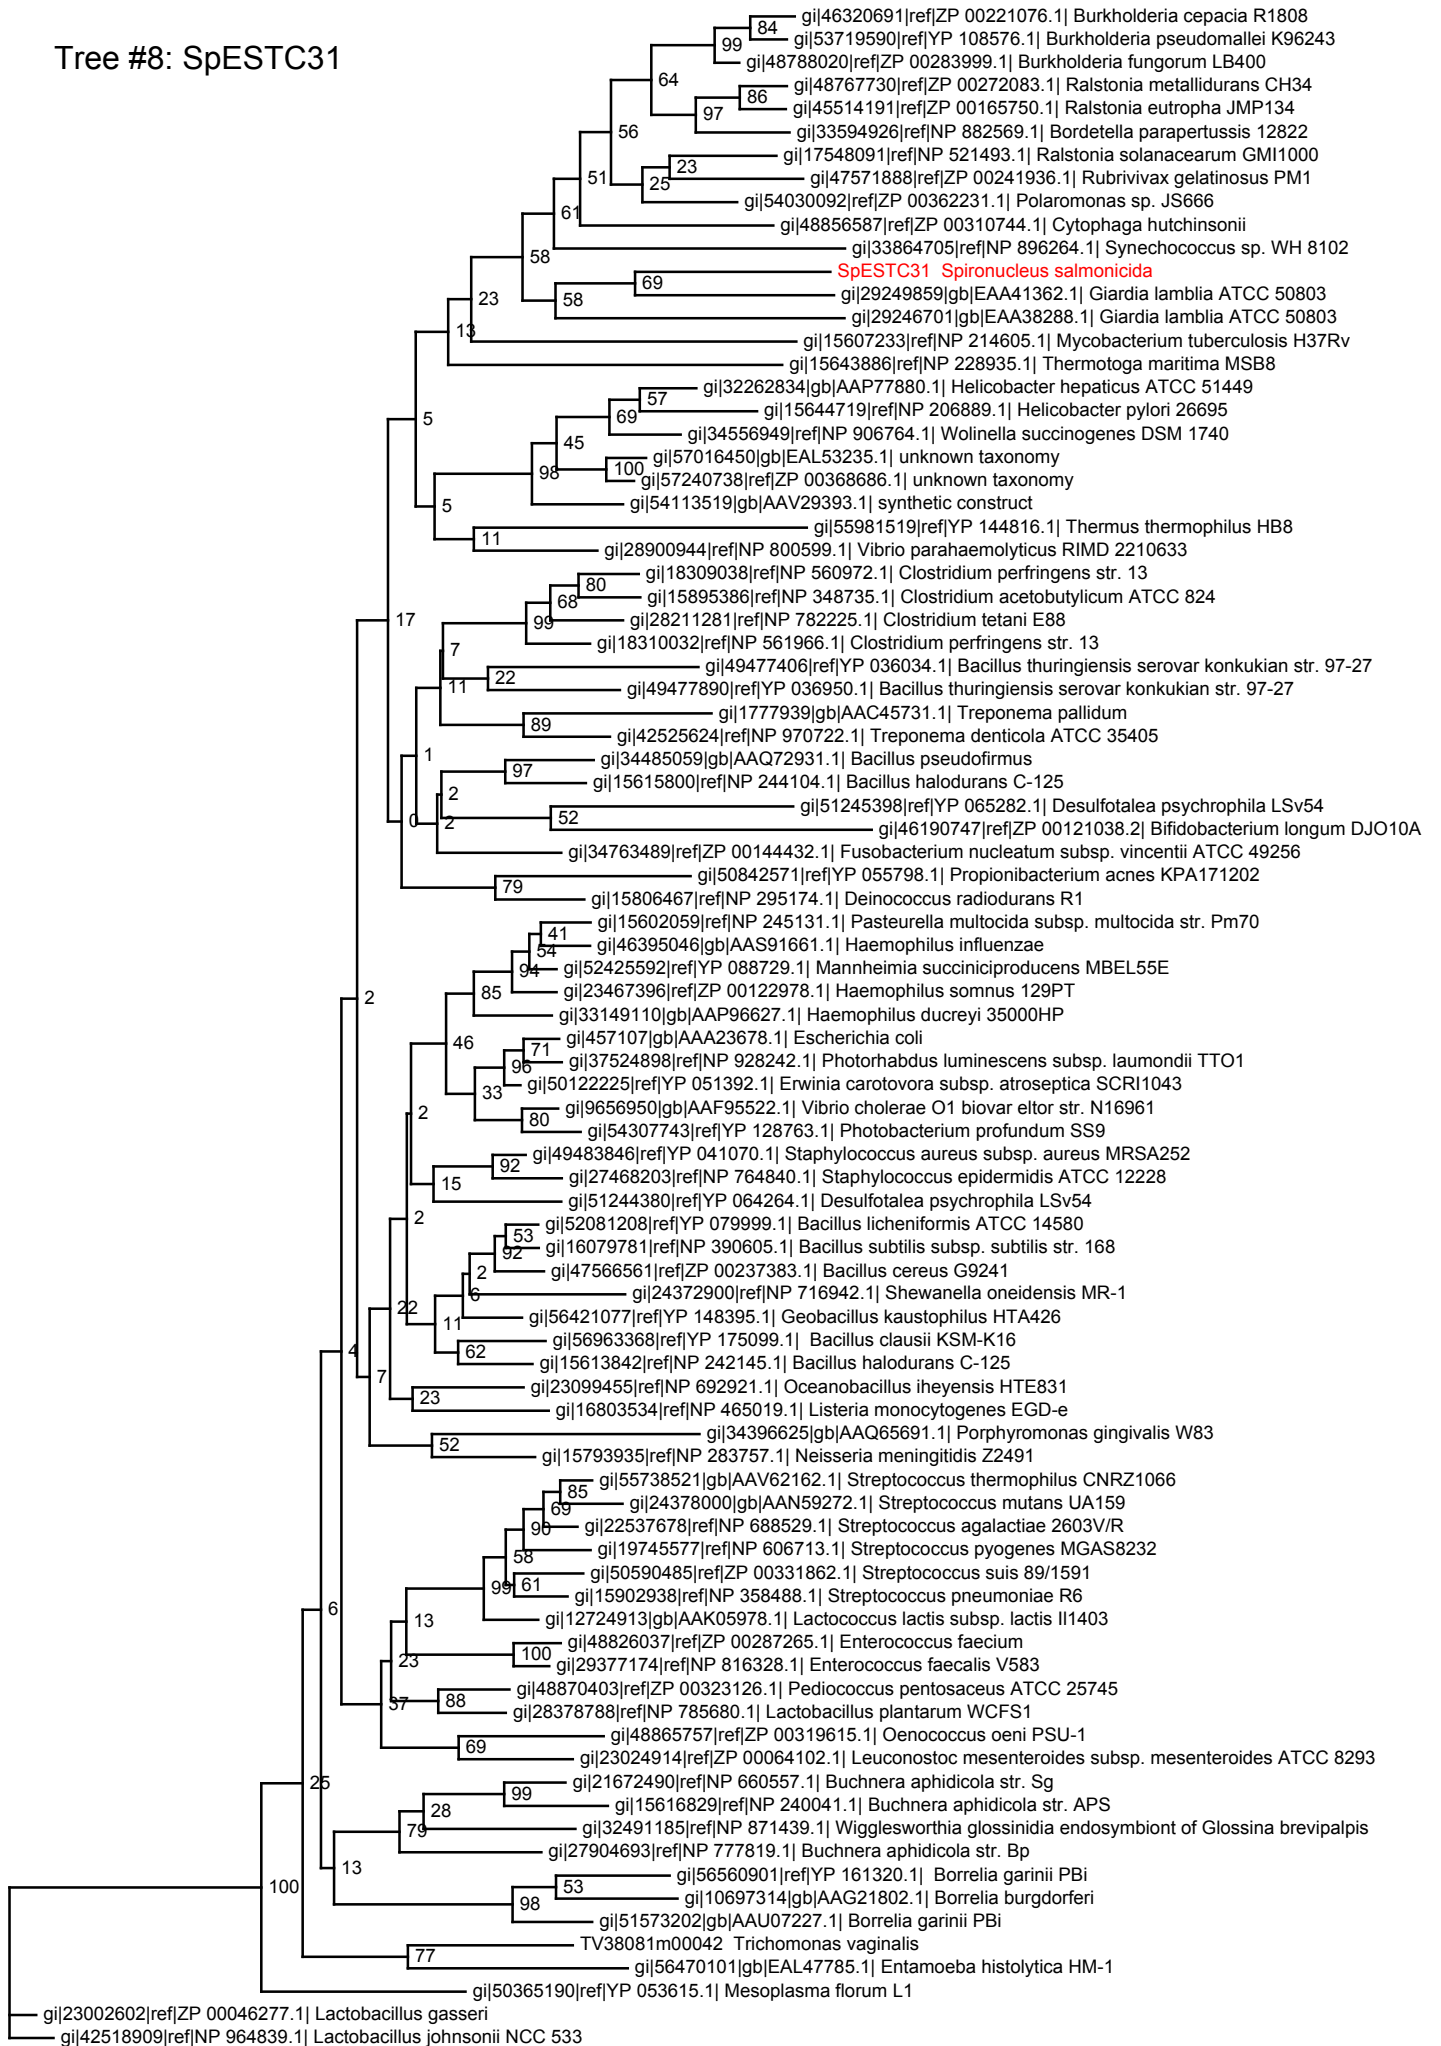



Tree #9: SpESTC83

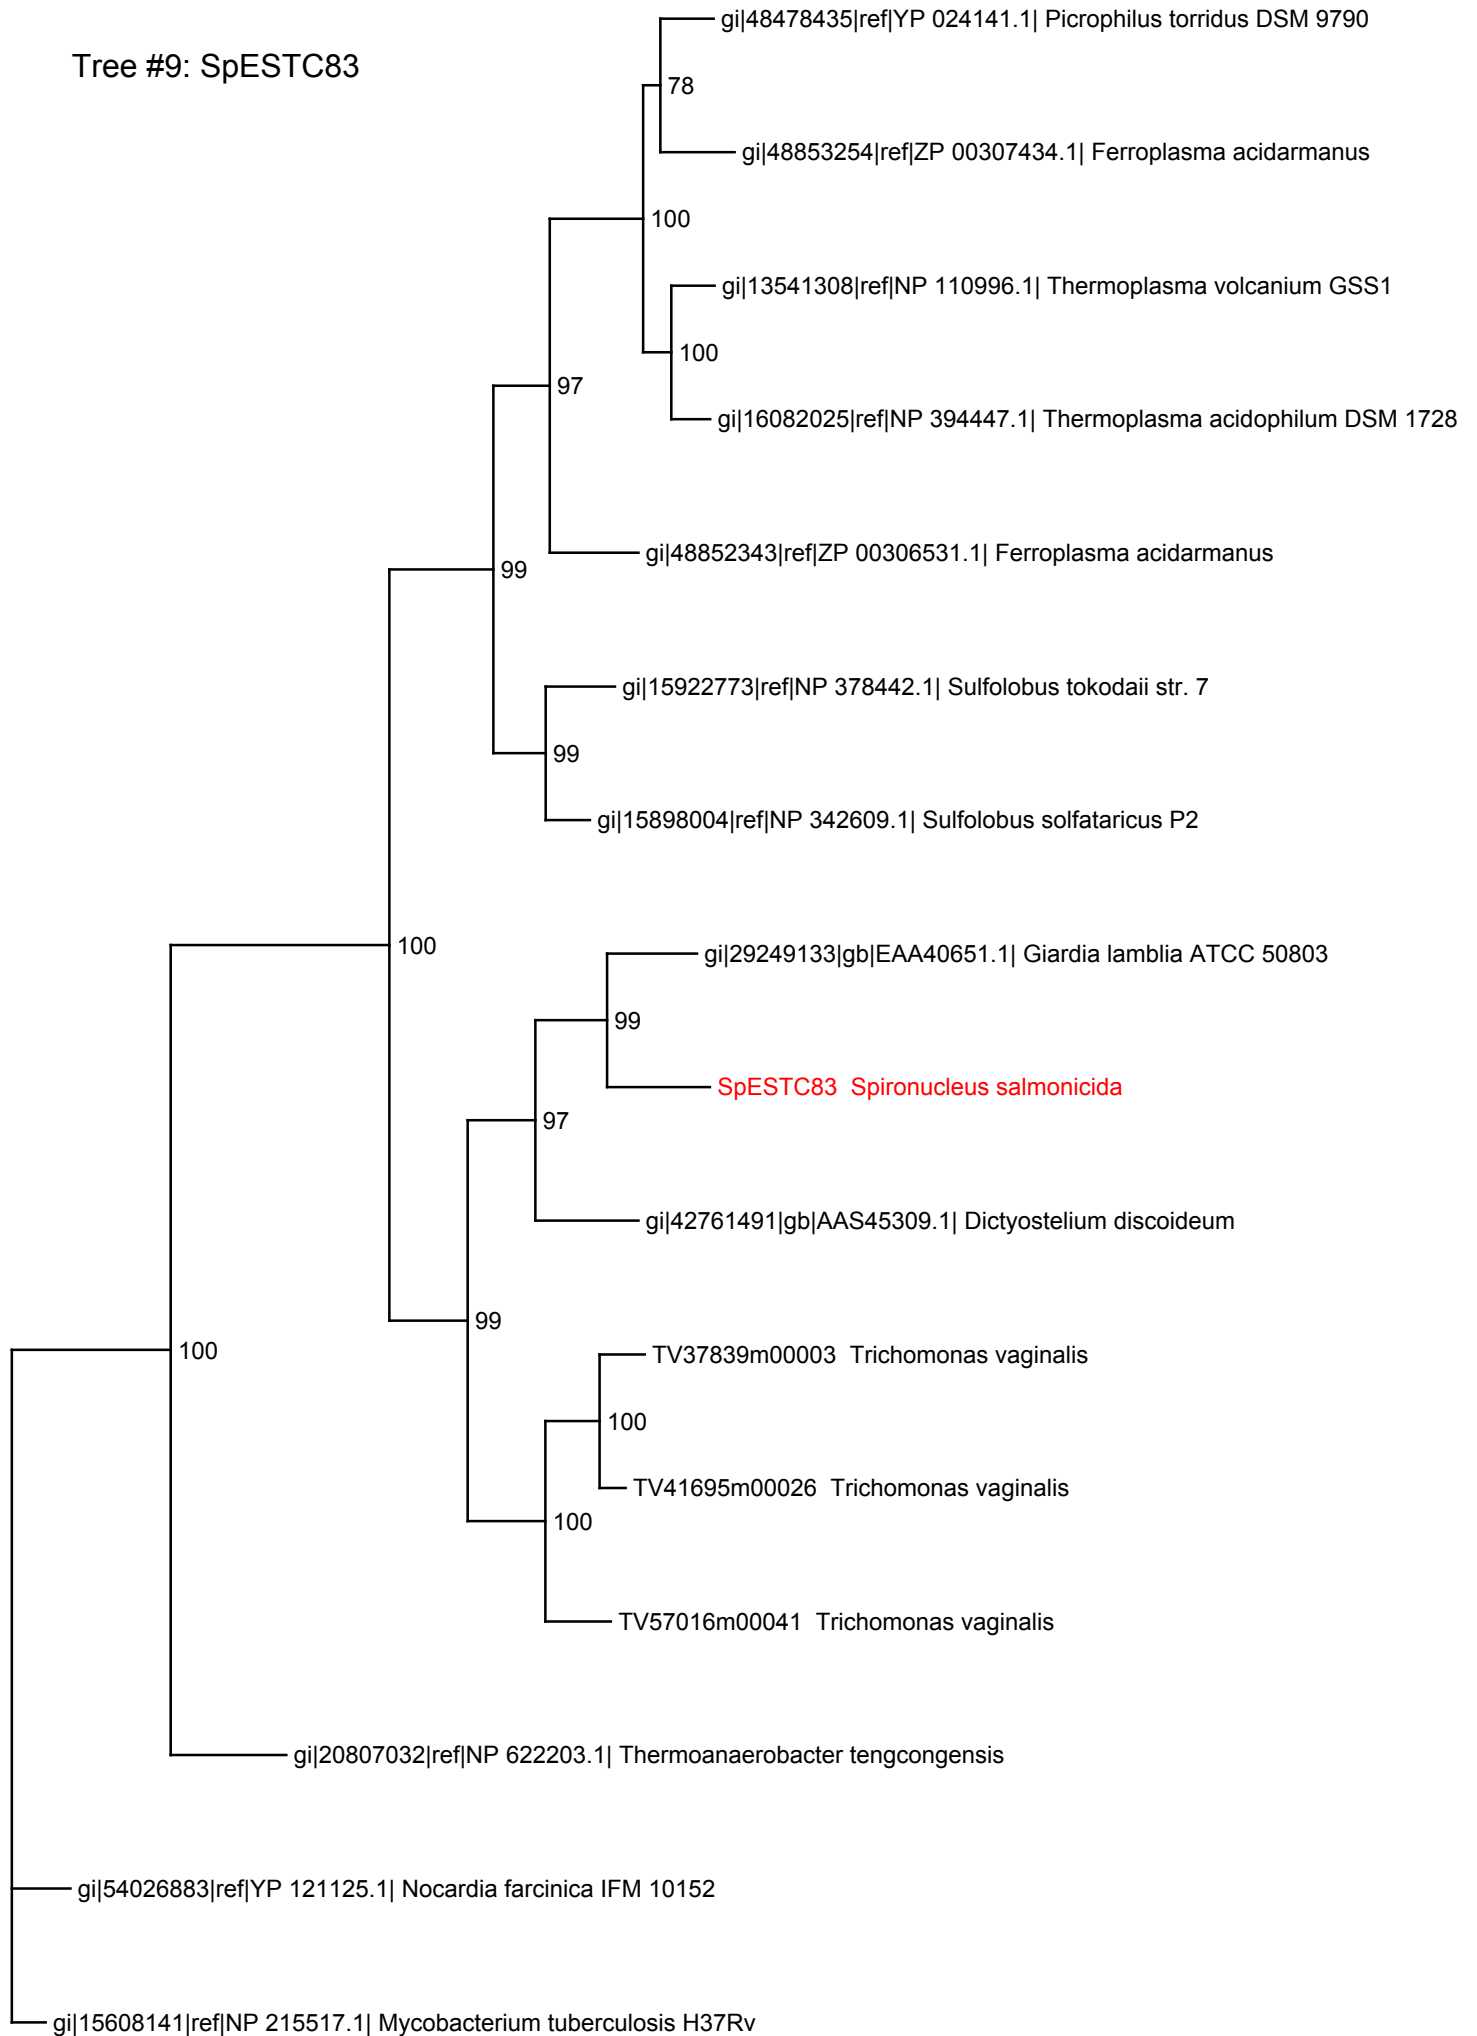

Tree #10: SpESTC221

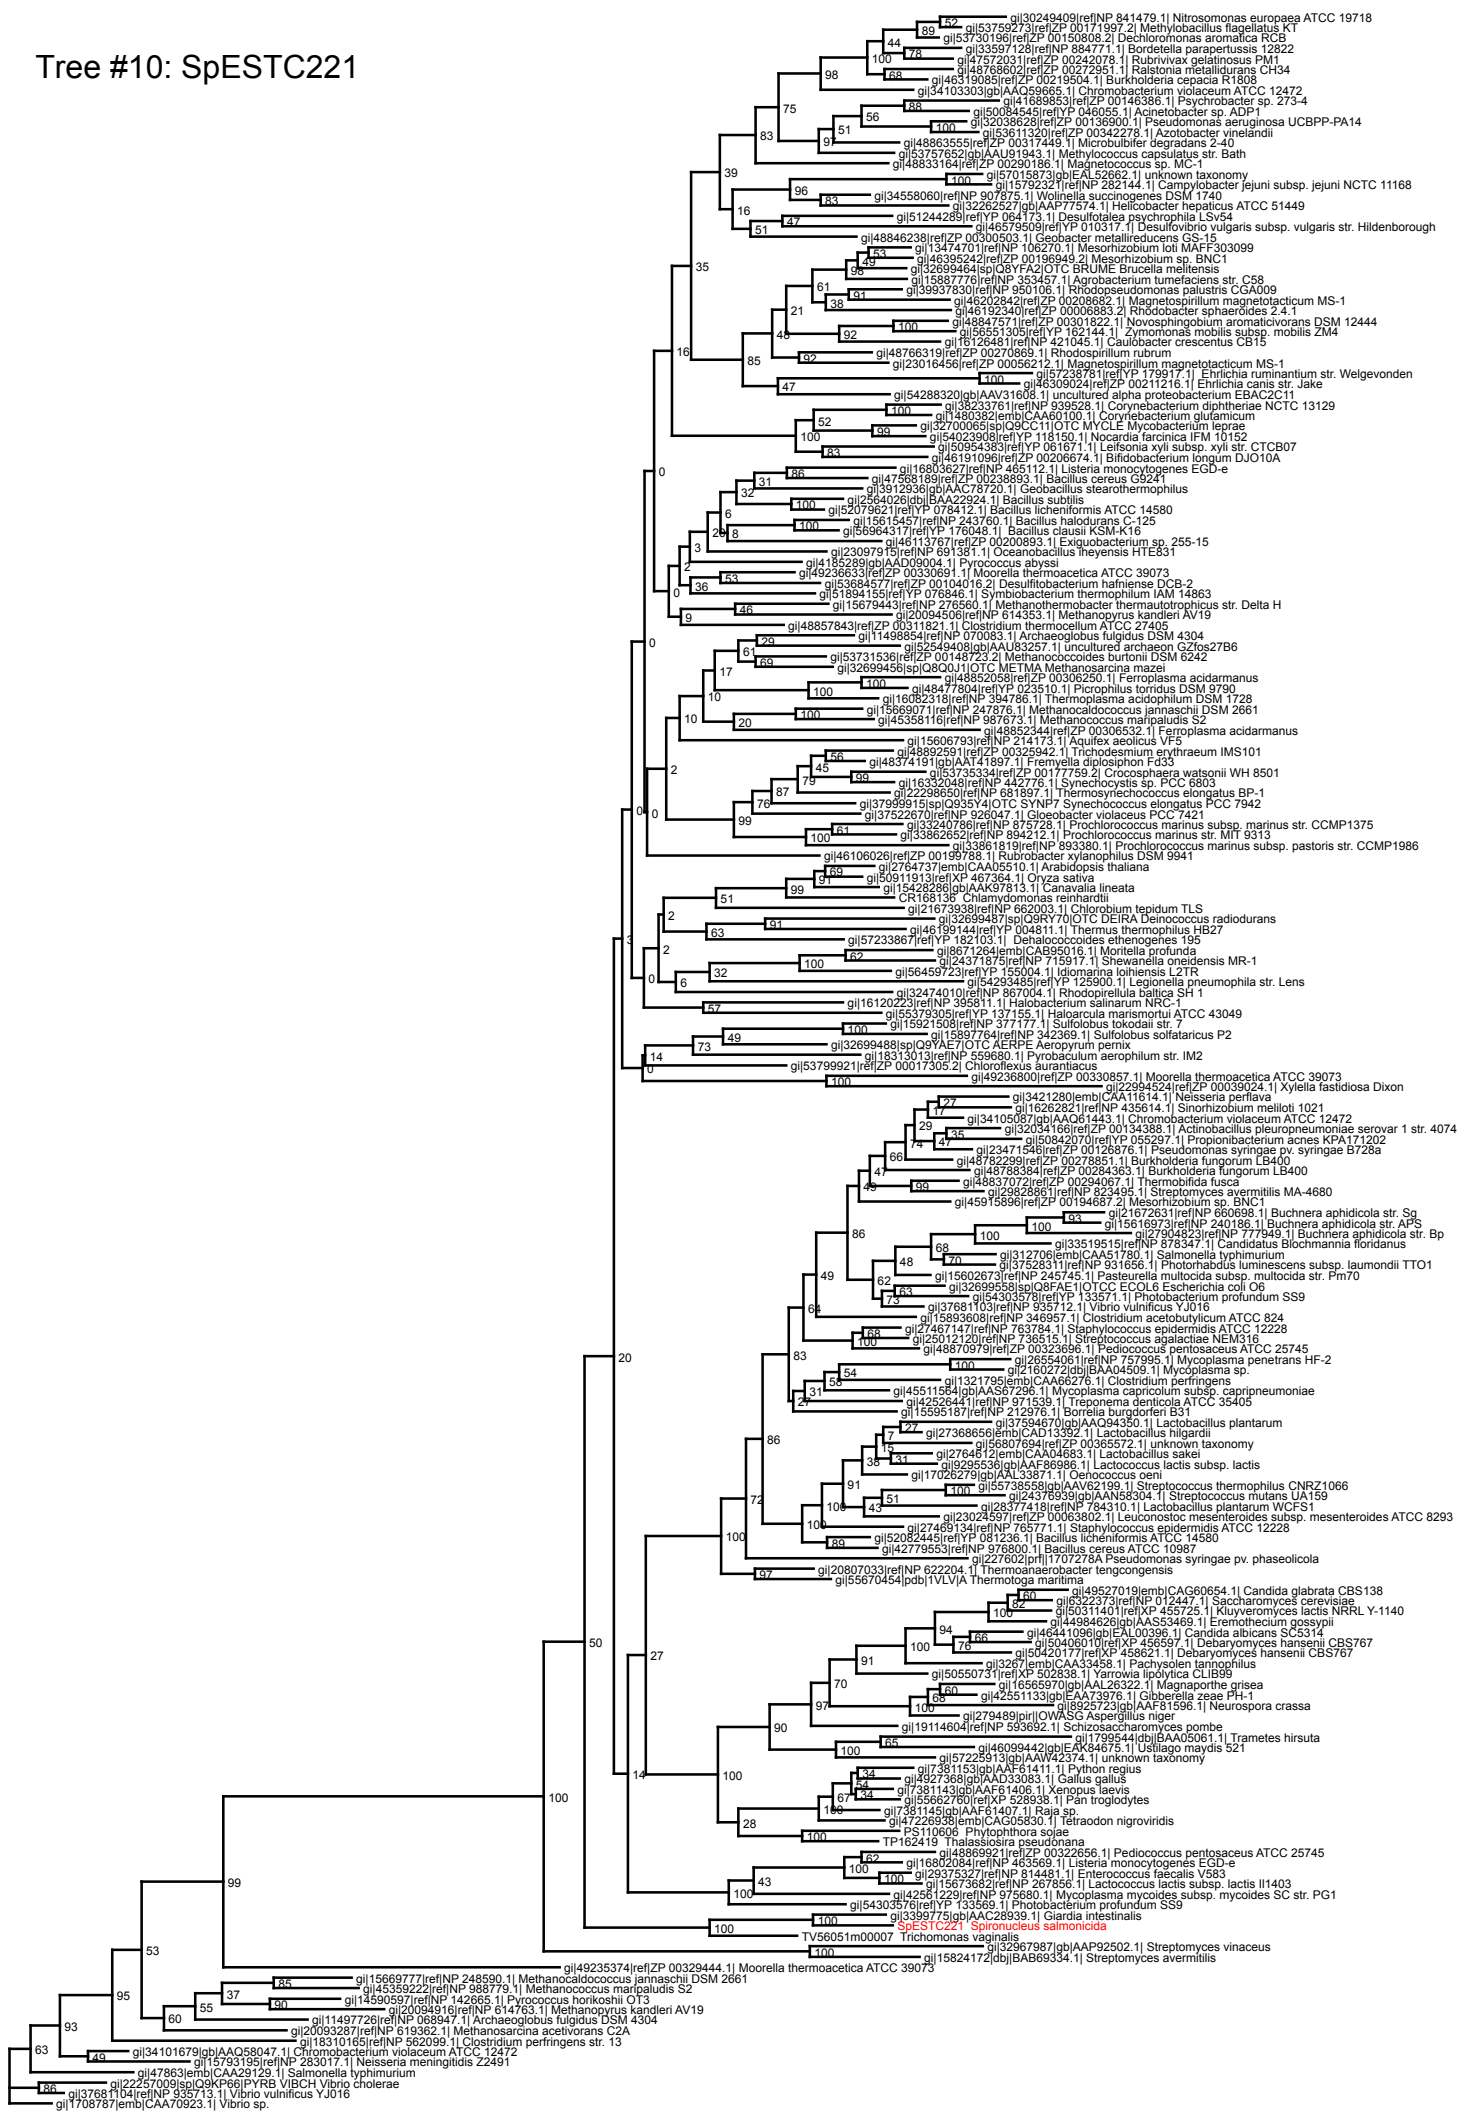

Tree #11: 27981826

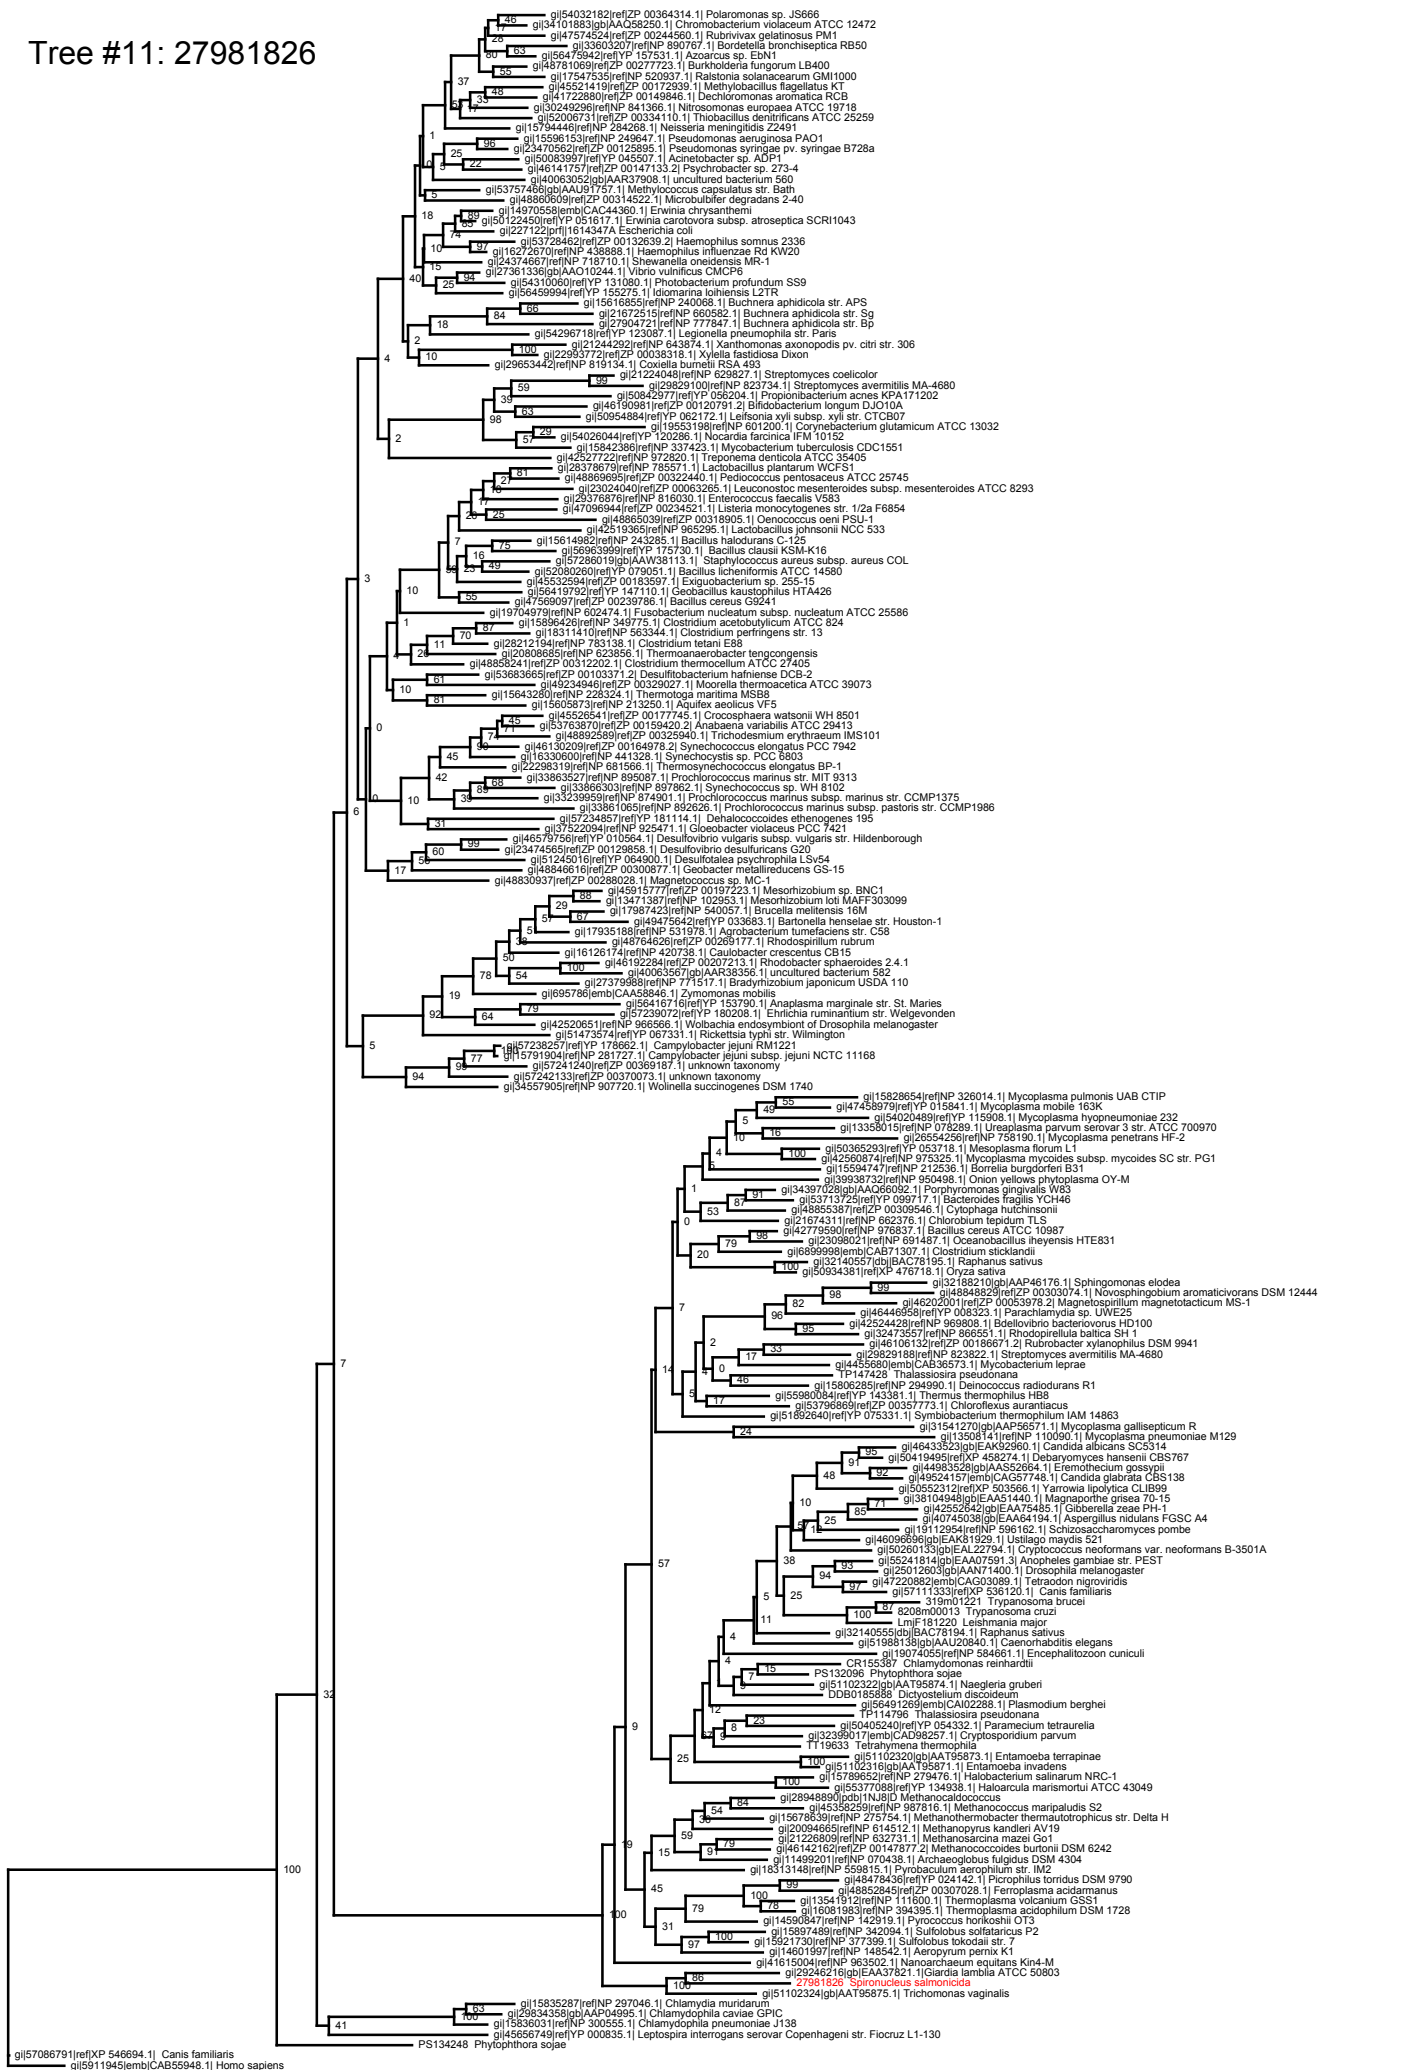

Tree #12: gZar602gT3,  
gZap30gT3

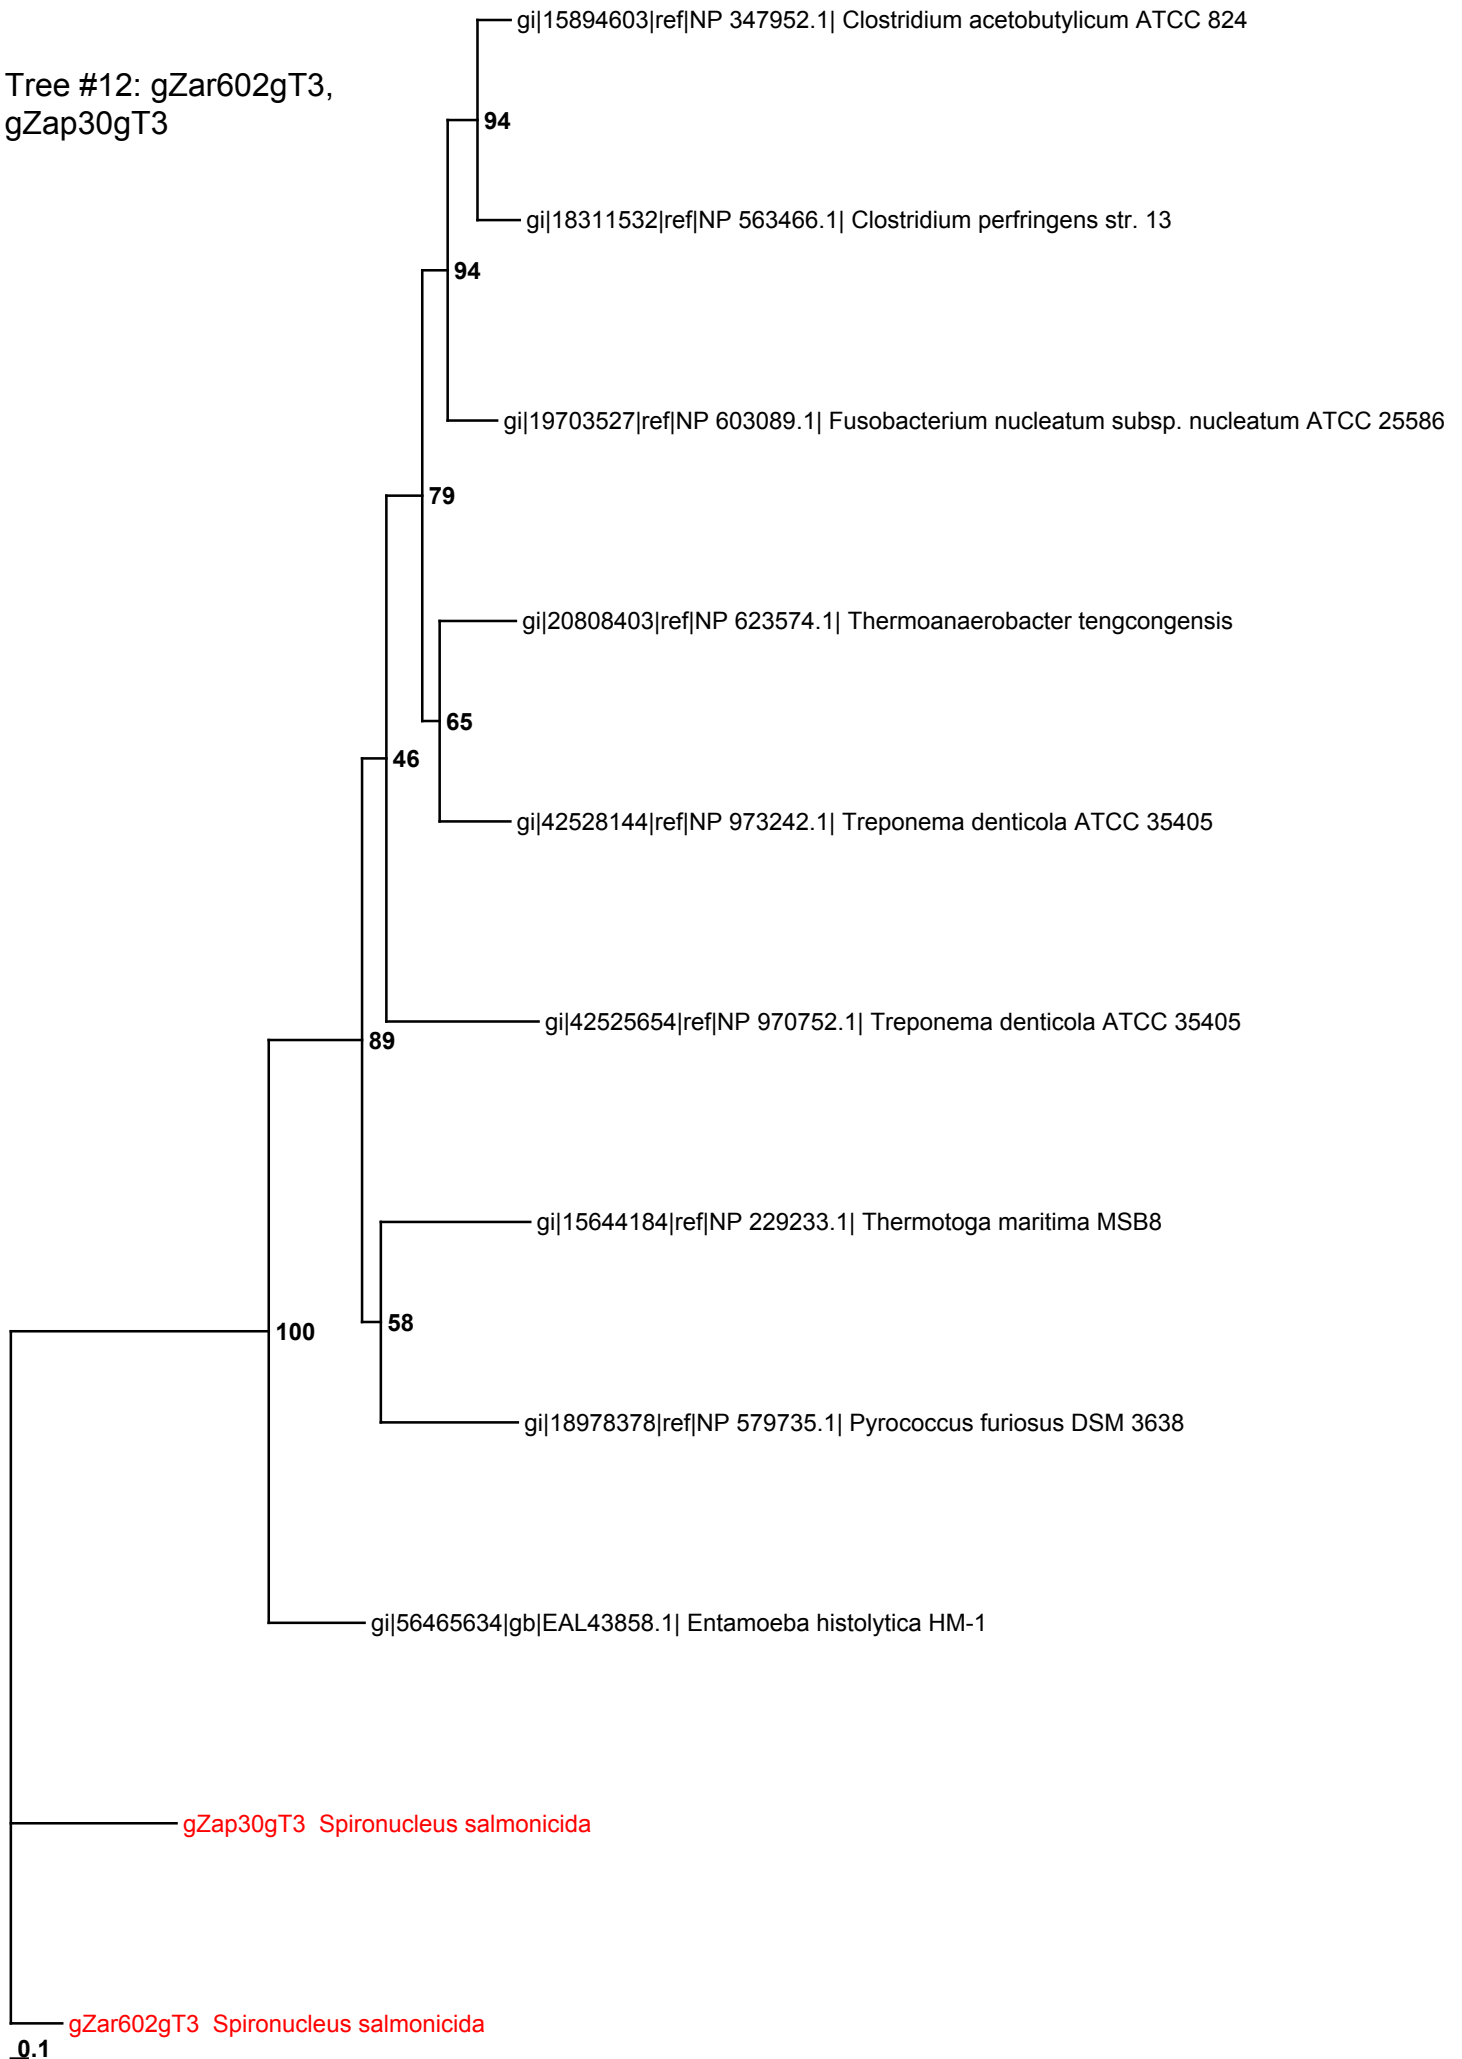



Tree #13: 27982357

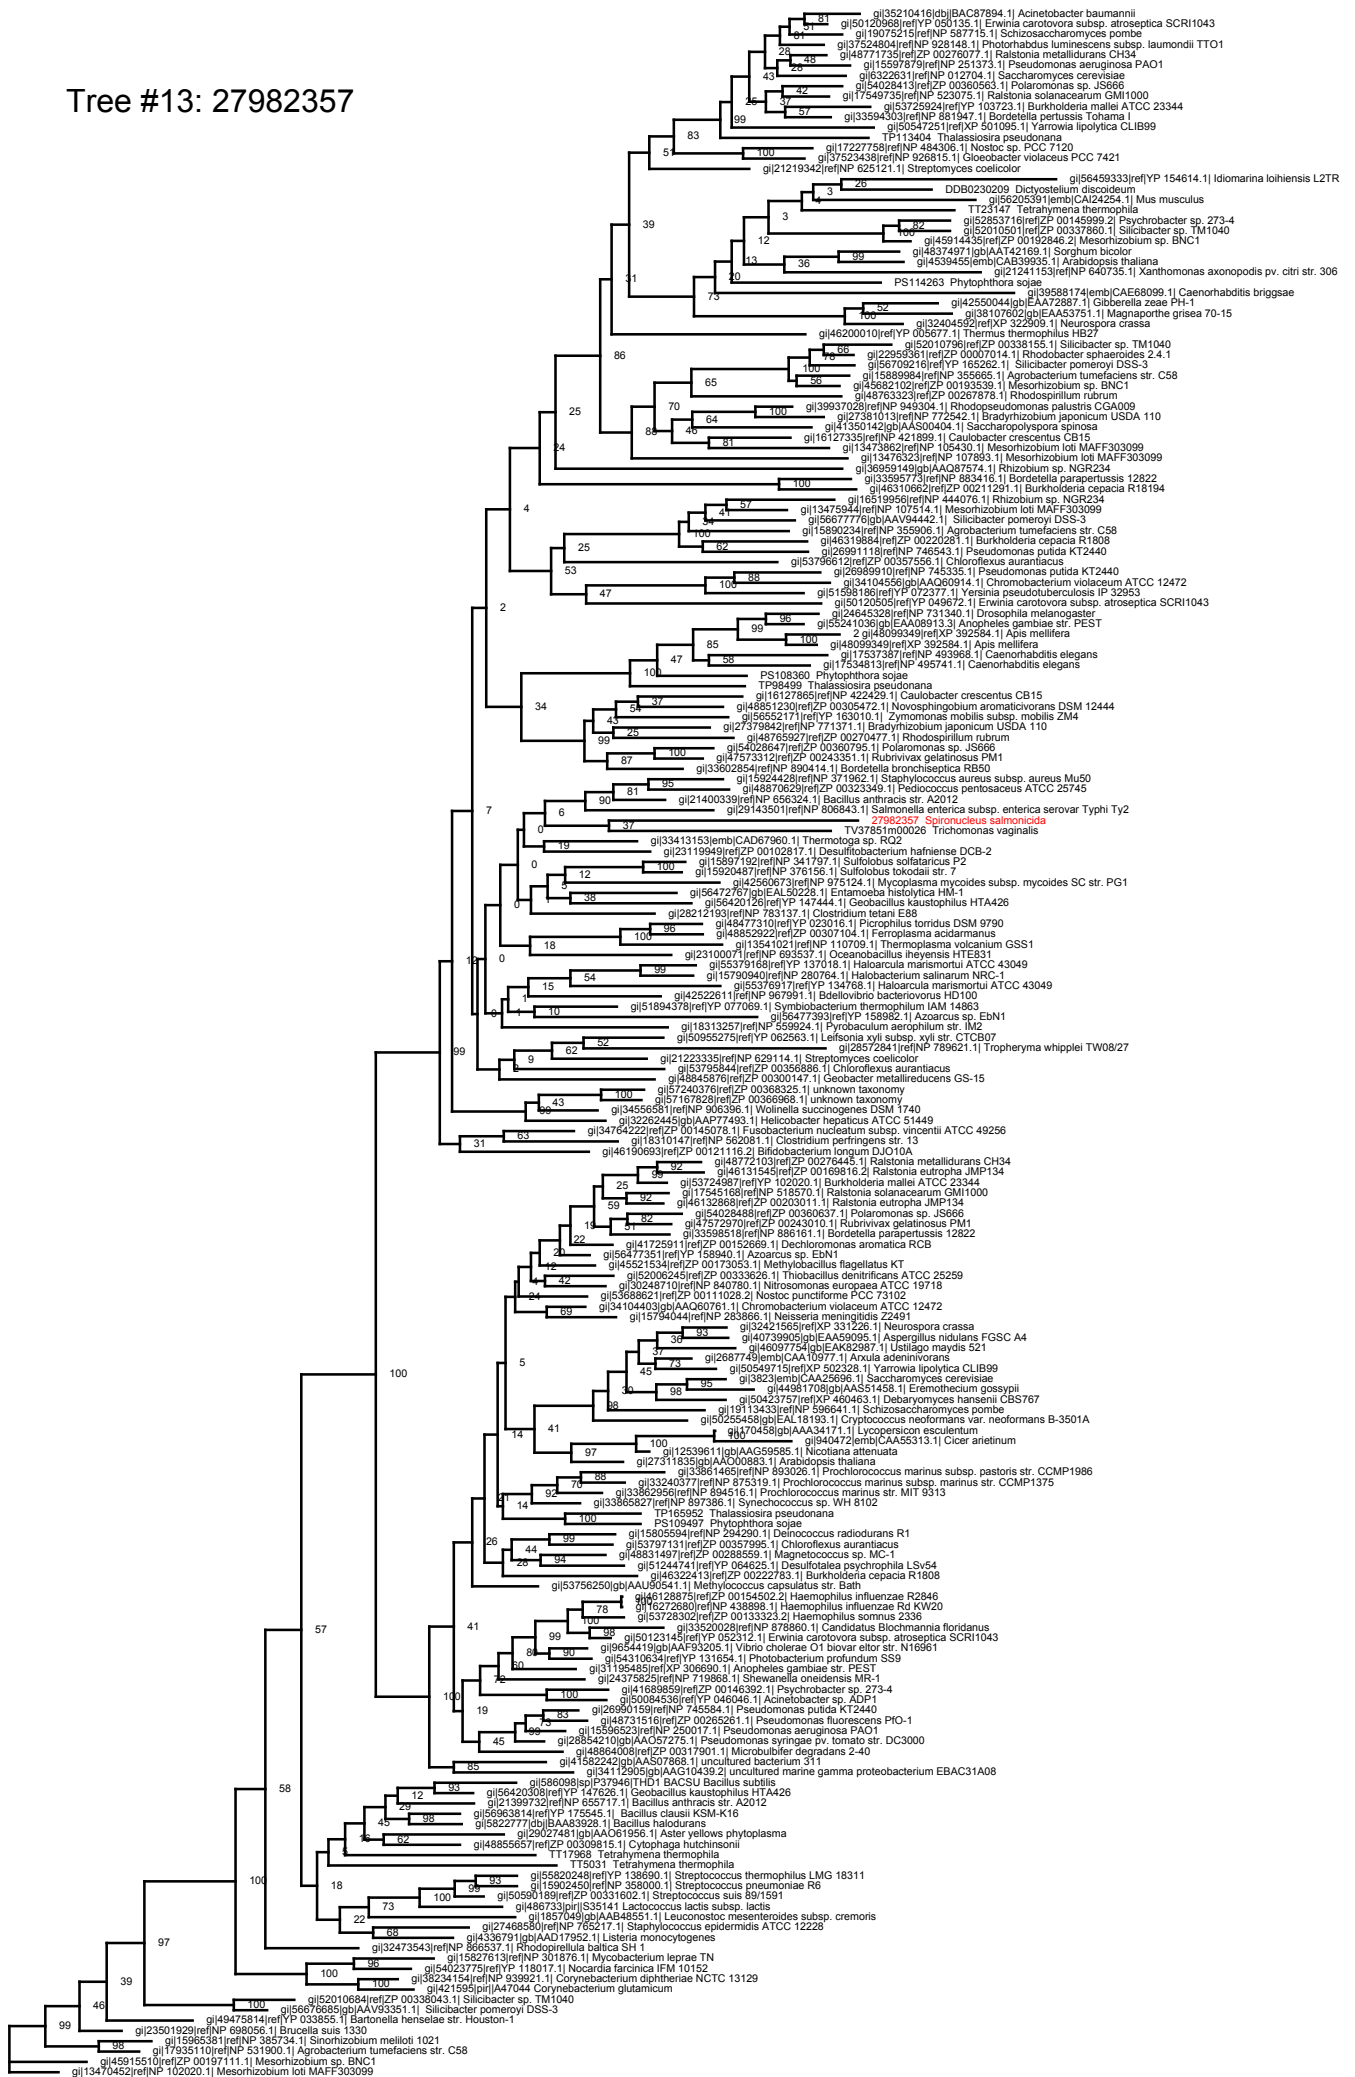

Tree #14: SpESTZap946

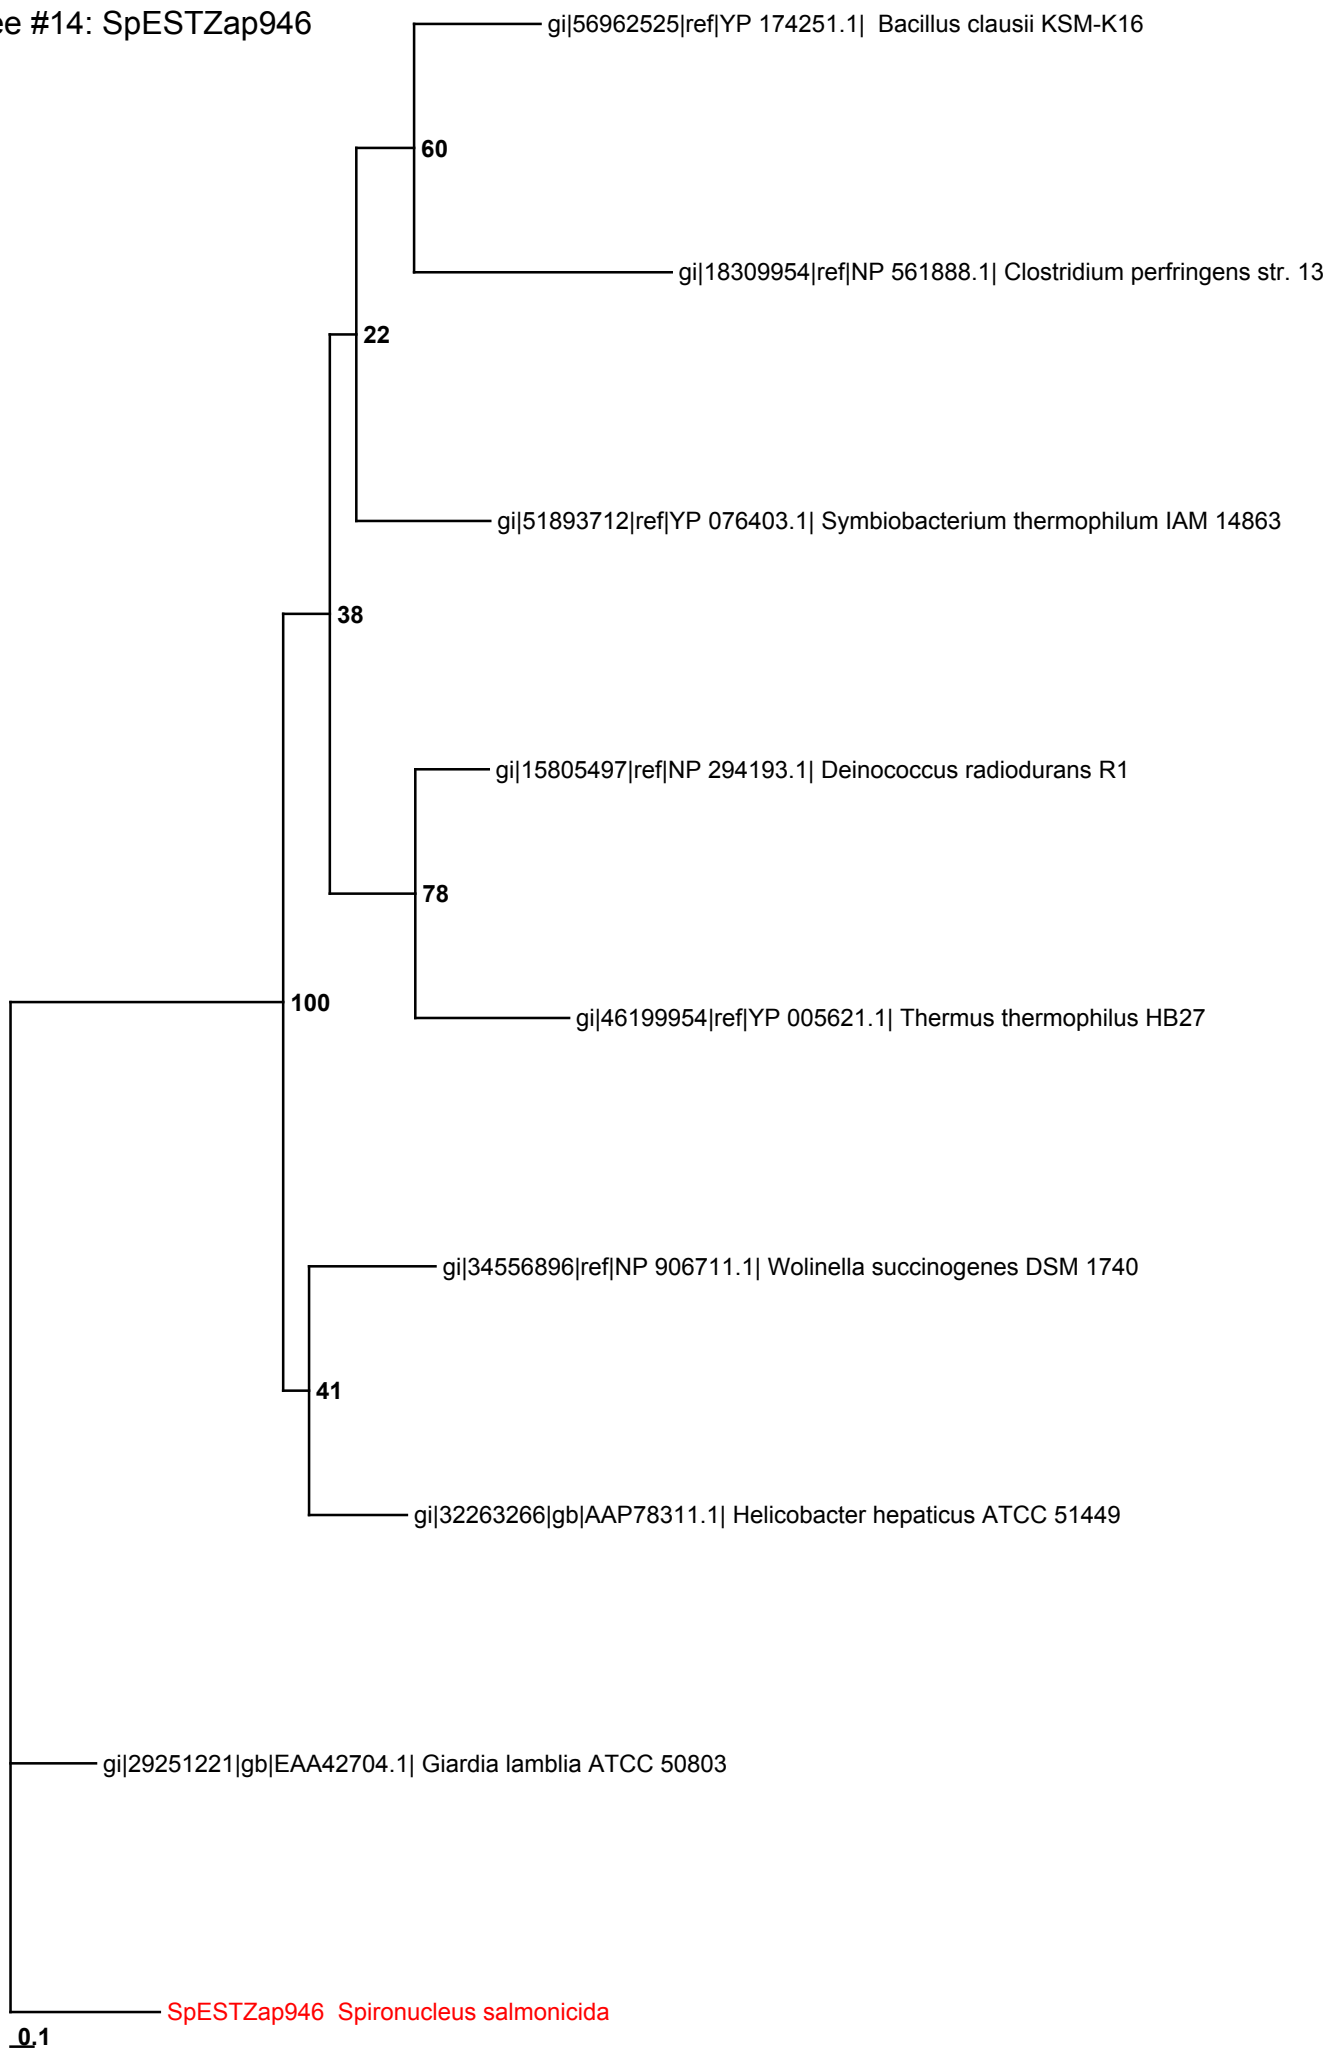

Tree #15: gZap84gT3

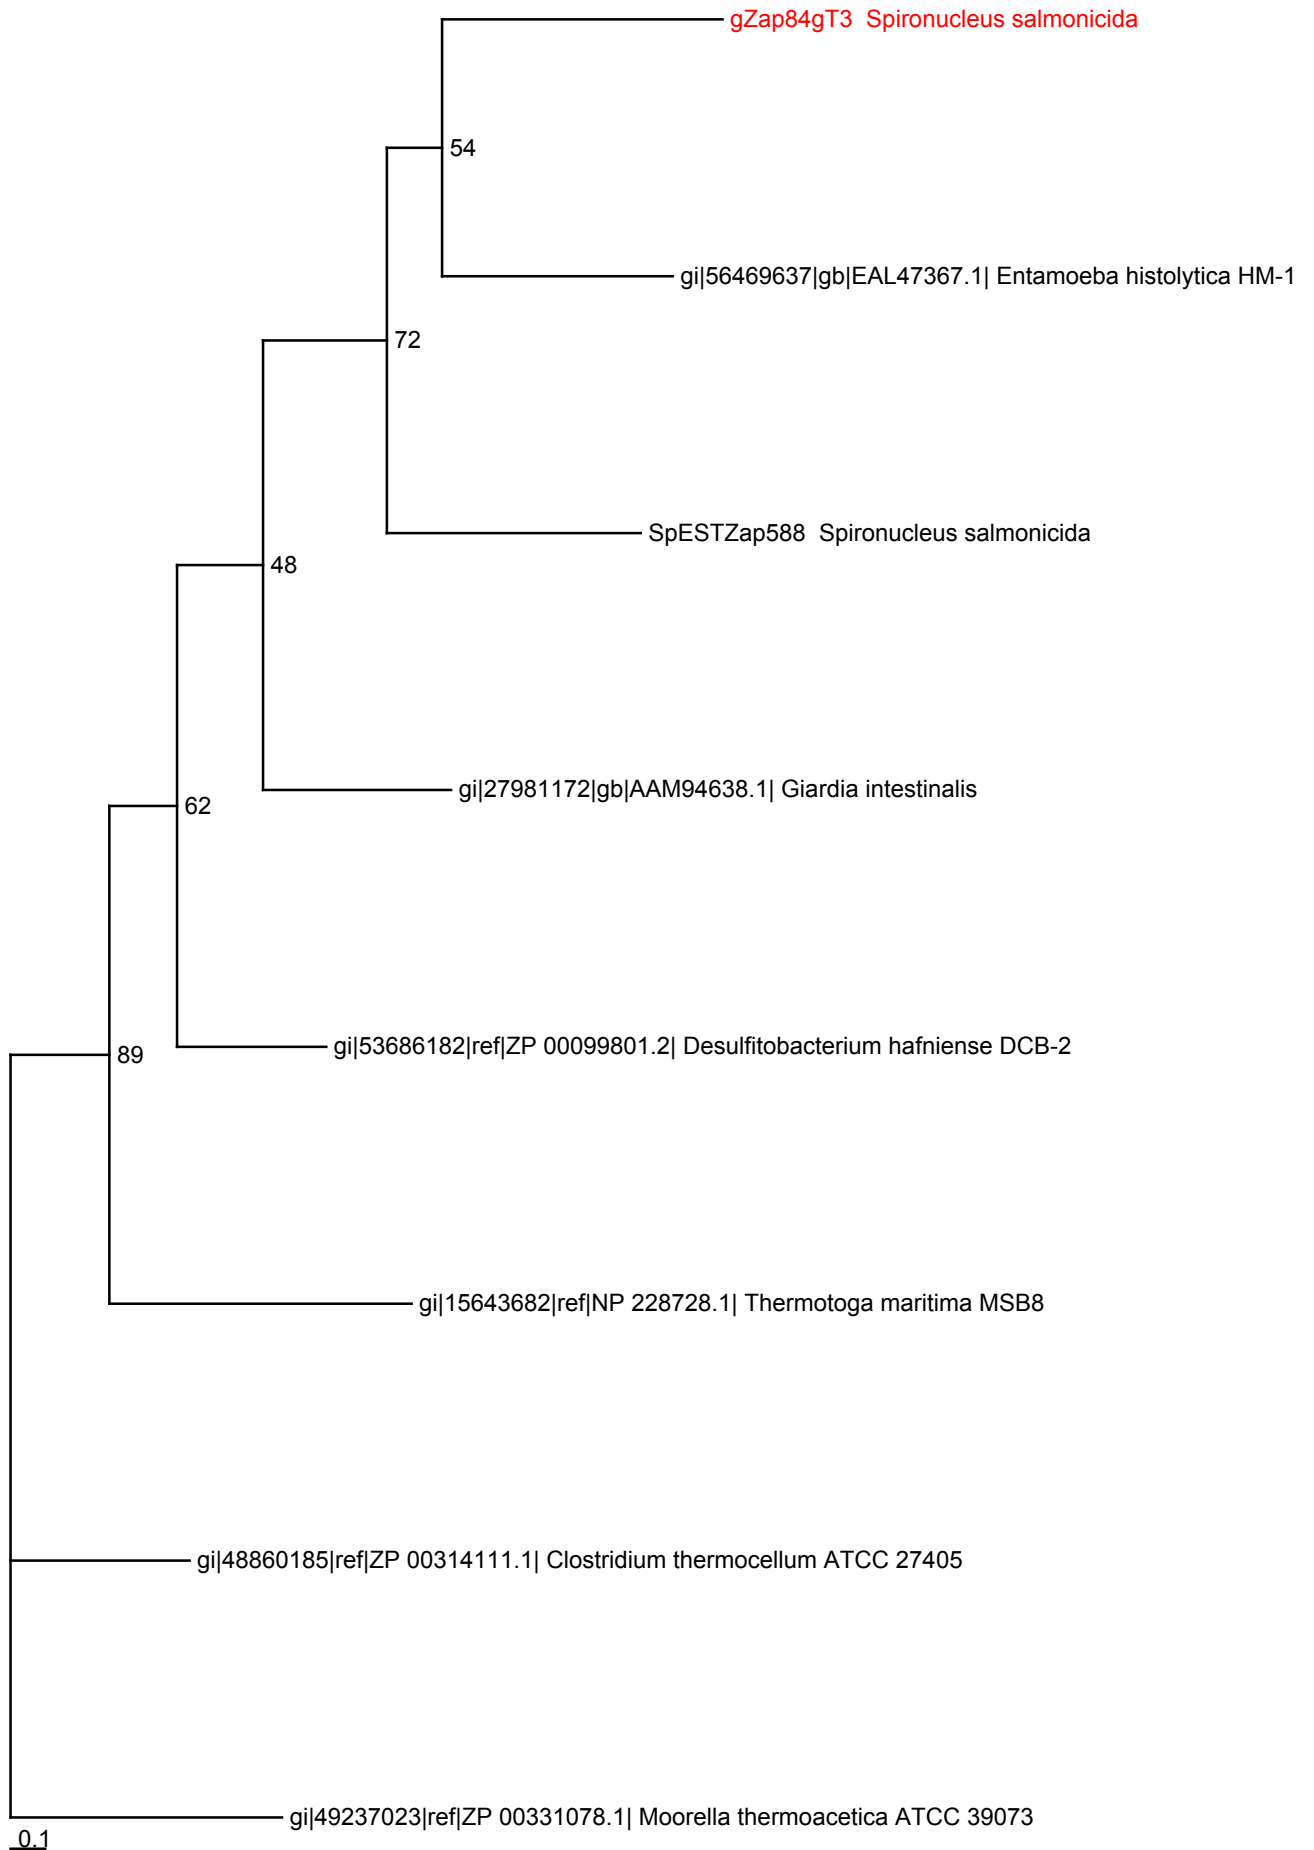

Tree #16: SpESTzap588, 27983189, 27983404

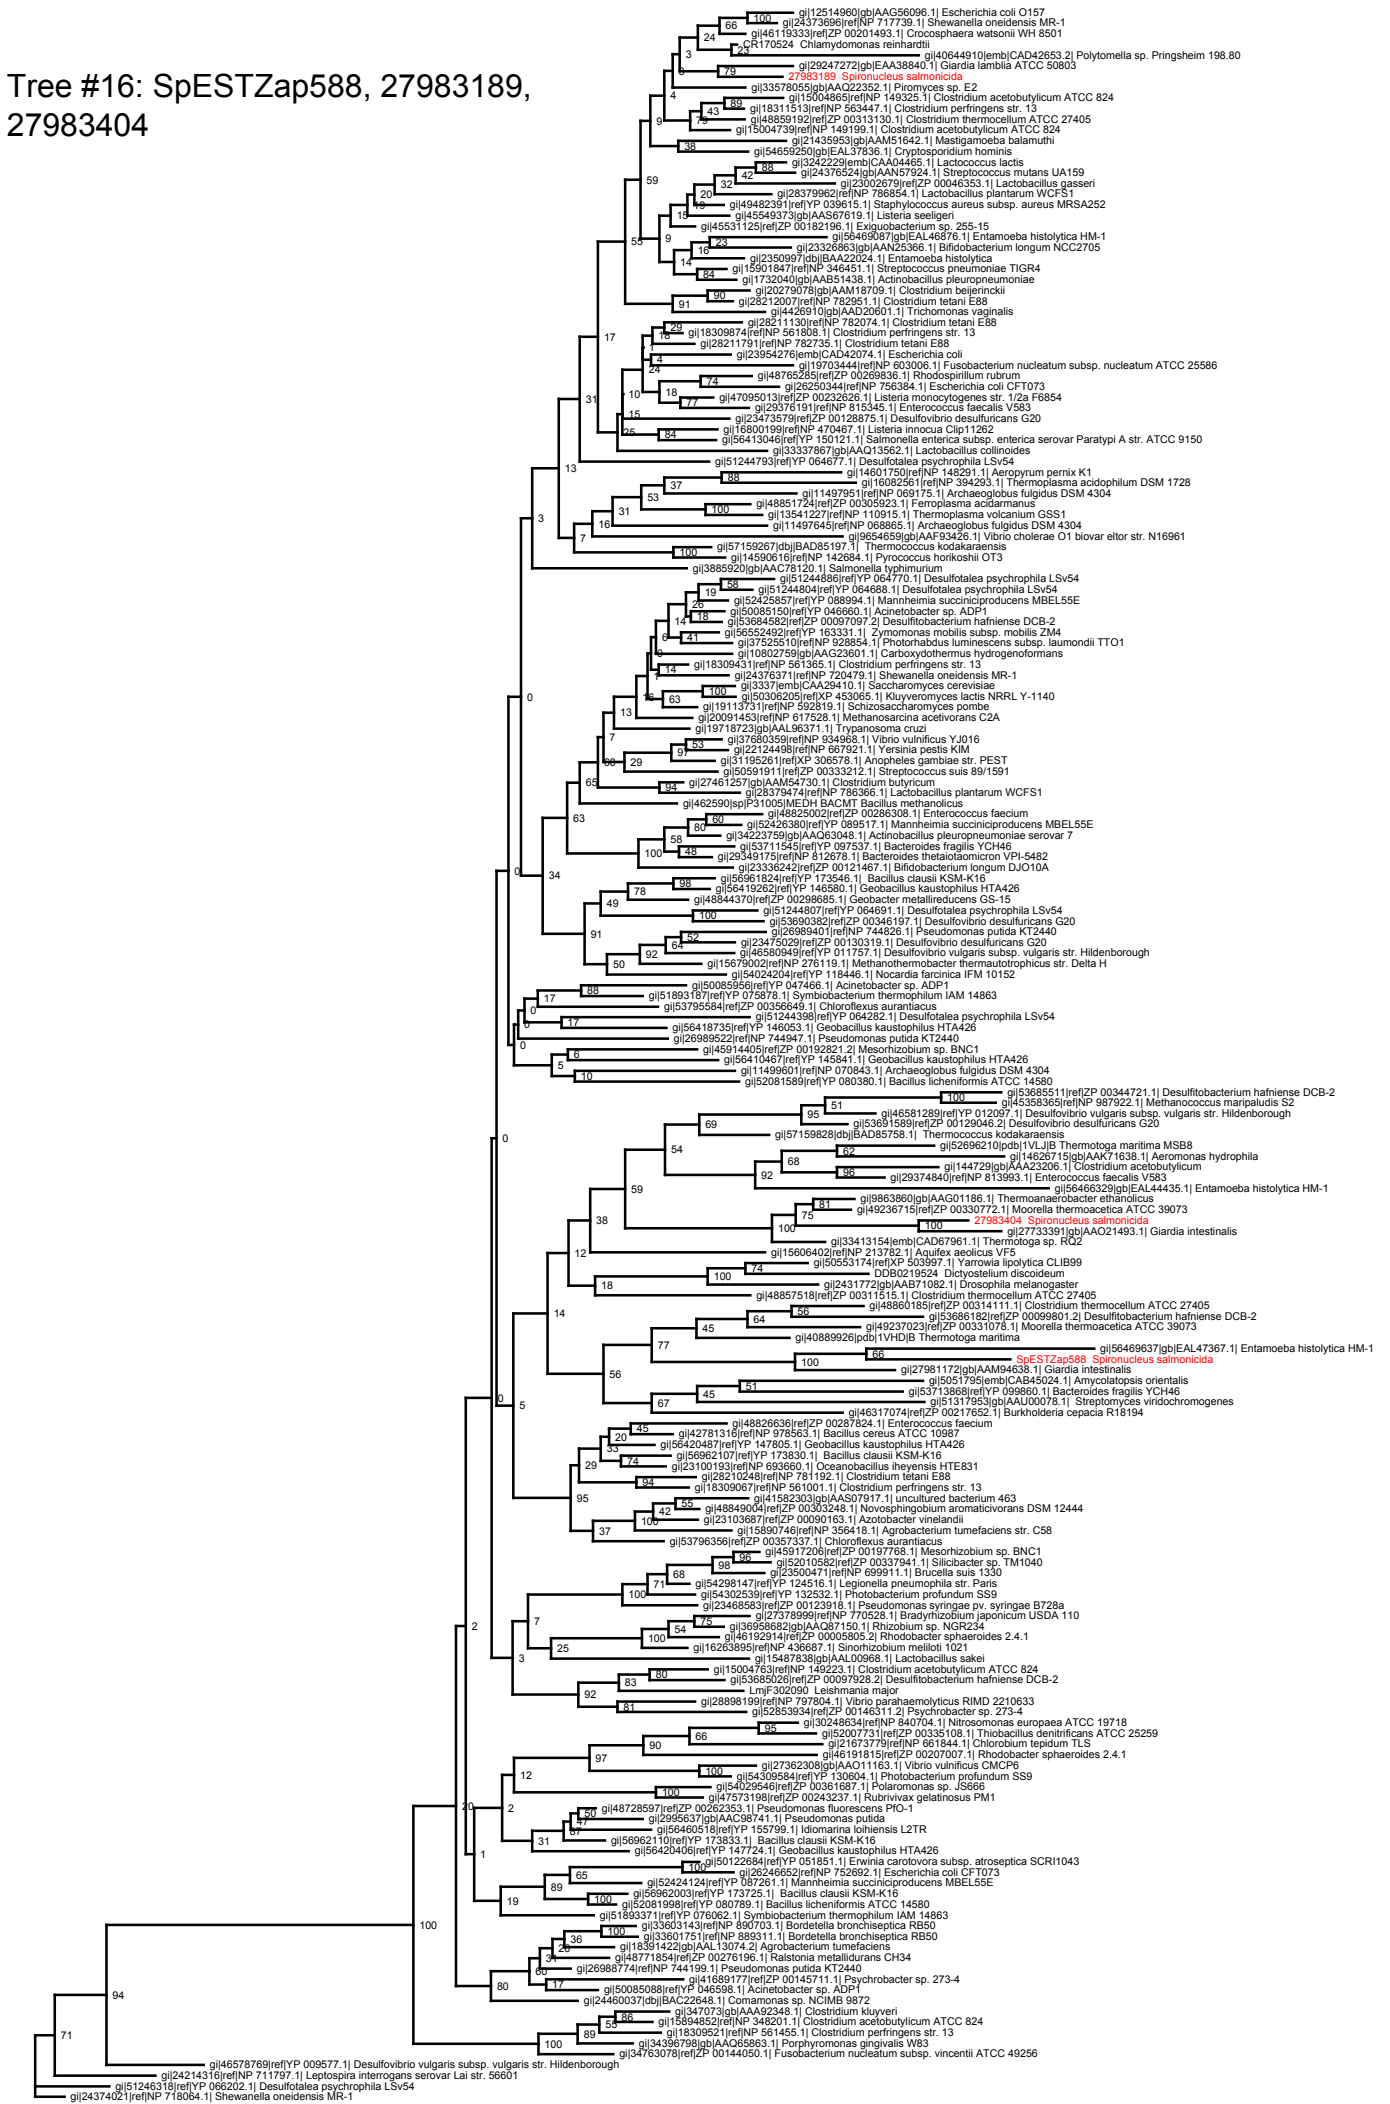



Tree 17: SpESTD325

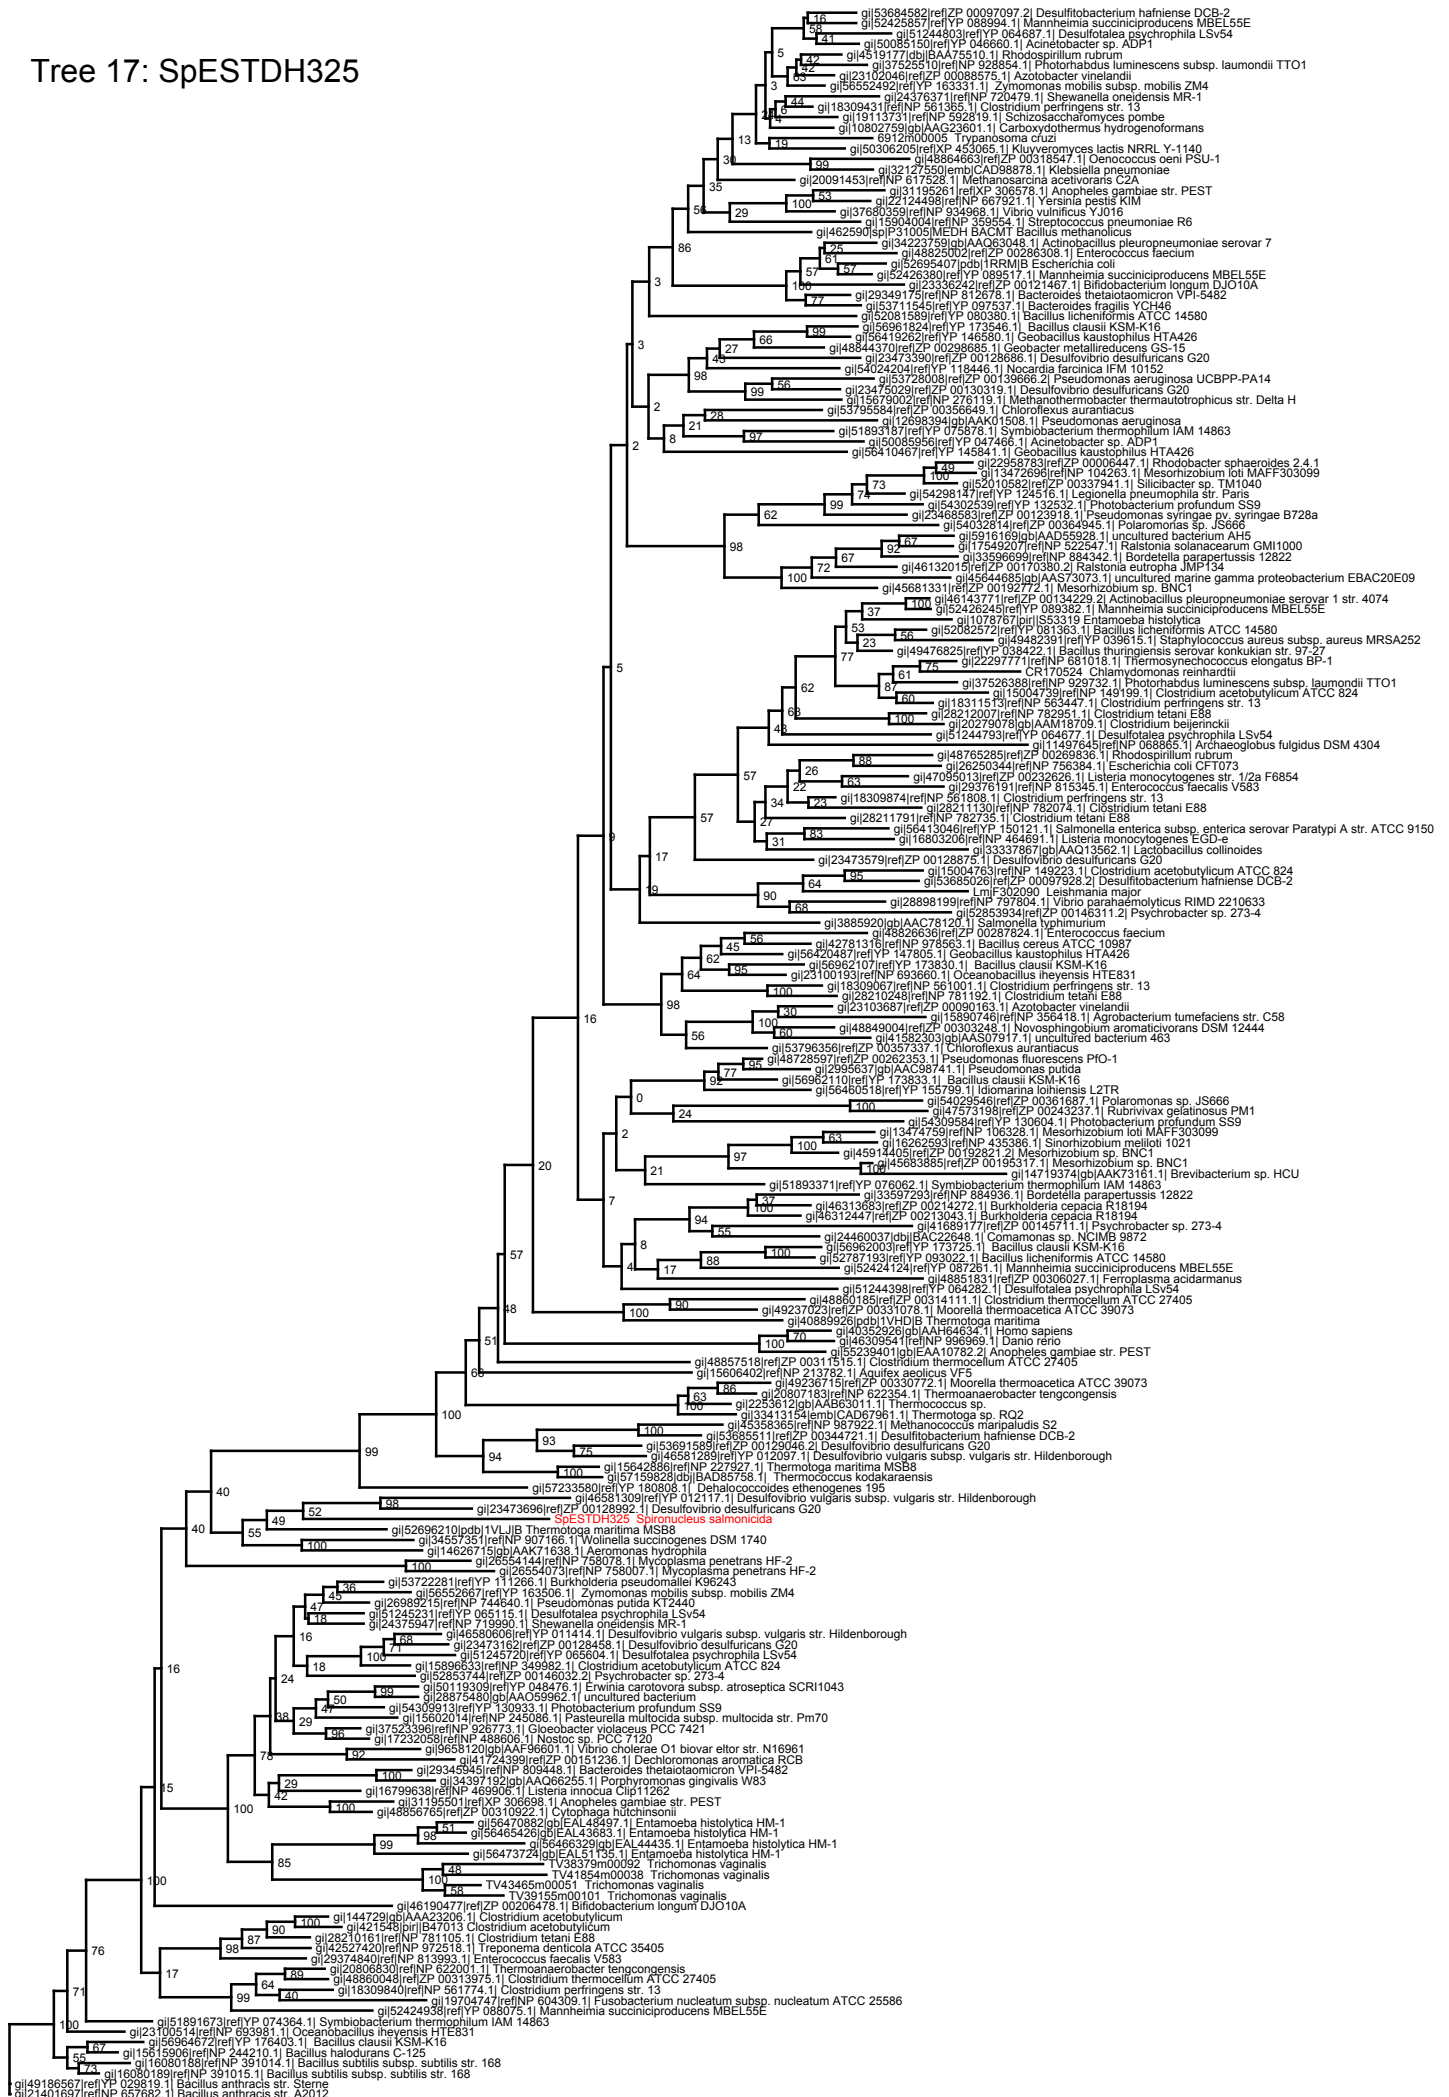

Tree #18: 23266714

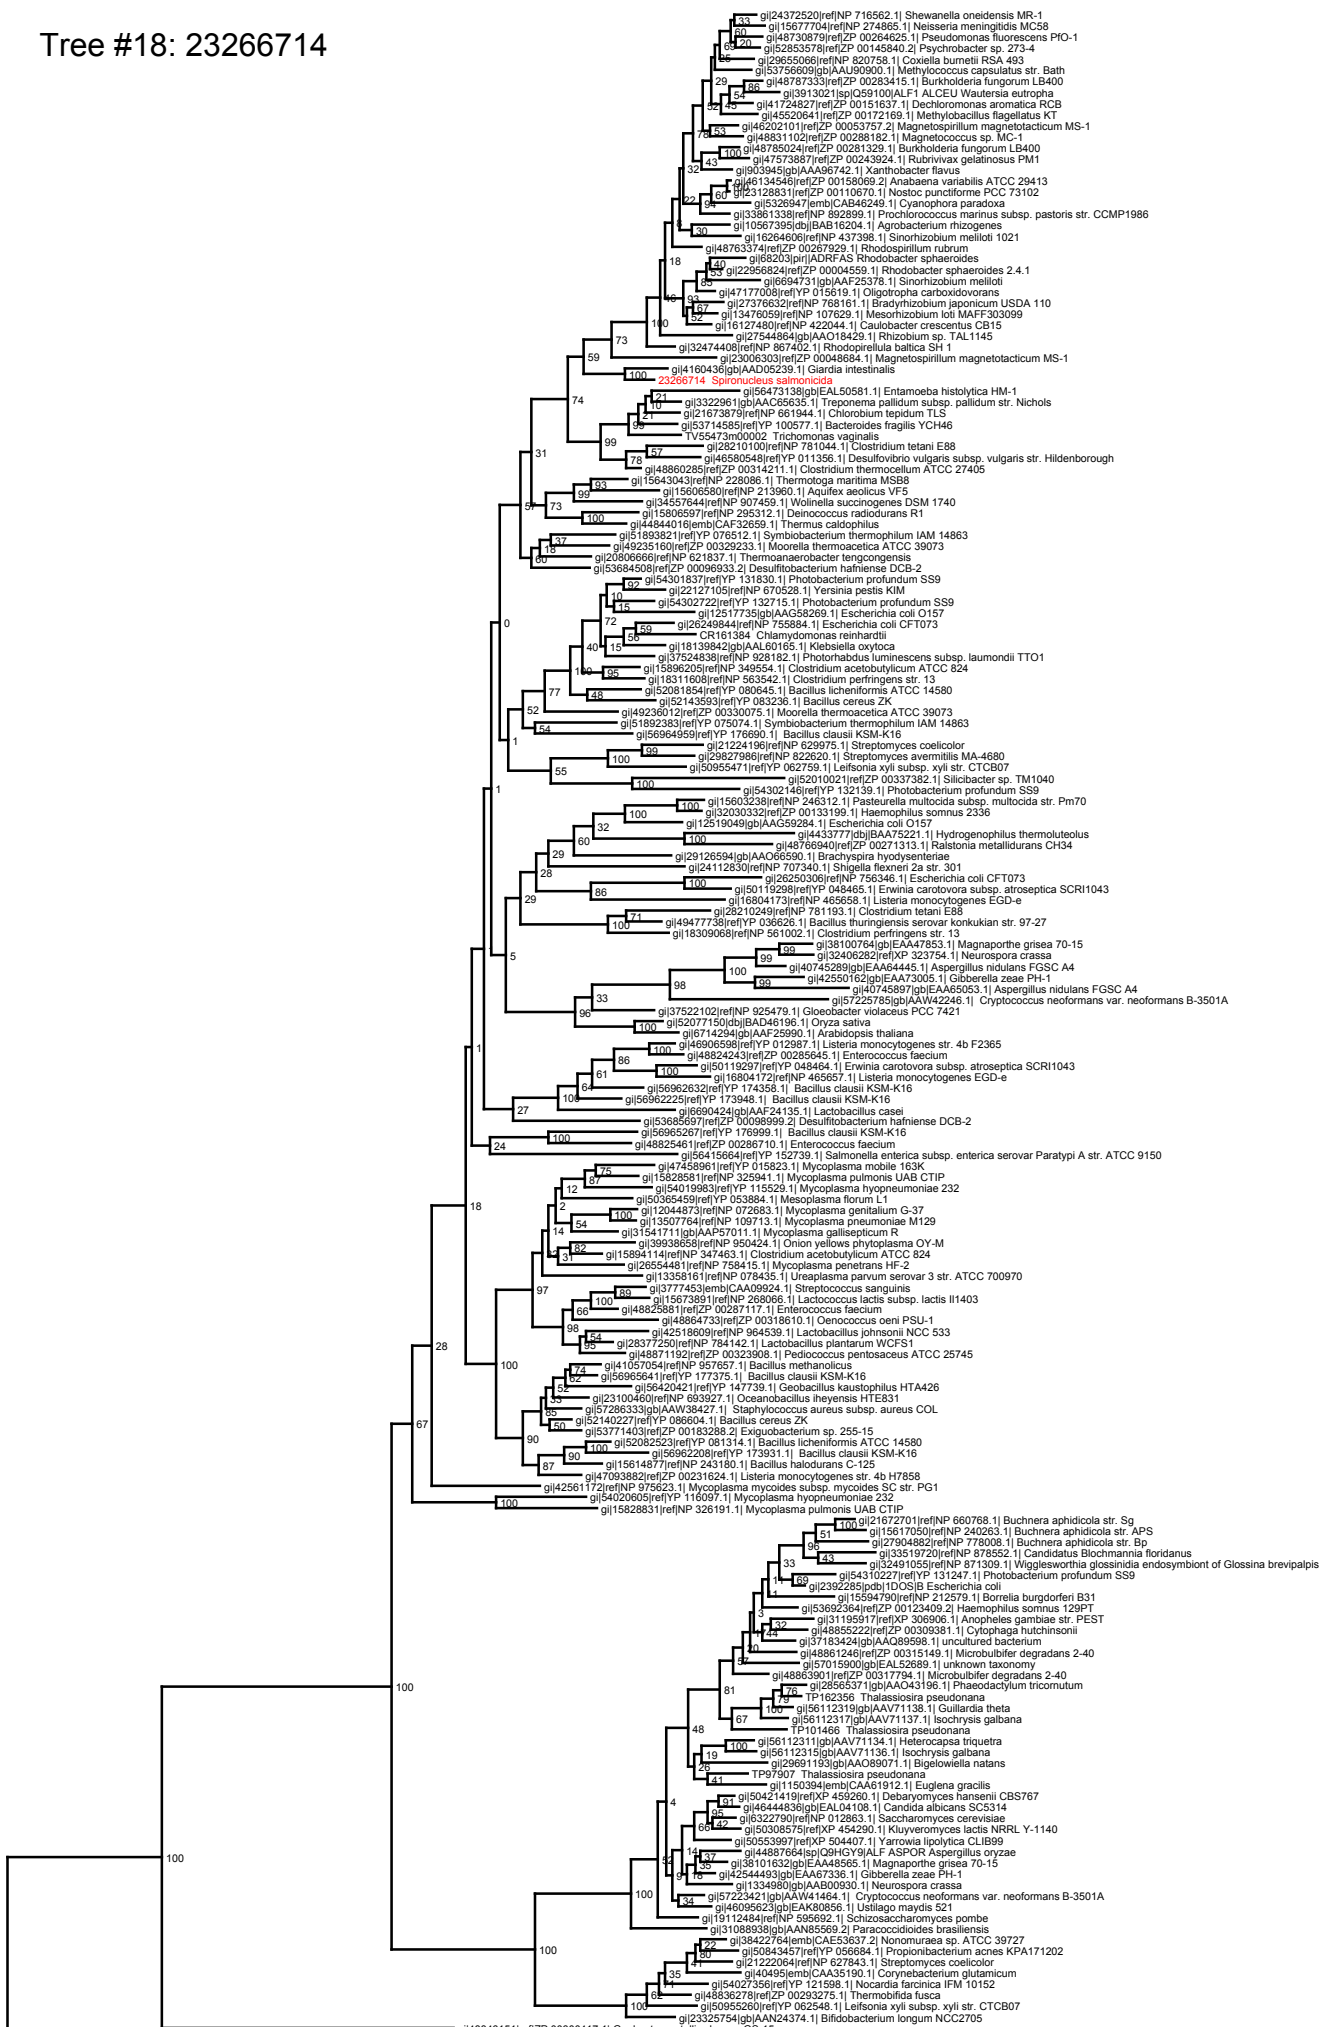

gi48844085|ref|ZP\_00298422.1| Geobacter metallireducens GS-15  
gi5246569|ref|YF\_066453.1| Desulfotalea psychrophila L5v54

Tree #19: SpESTZap404

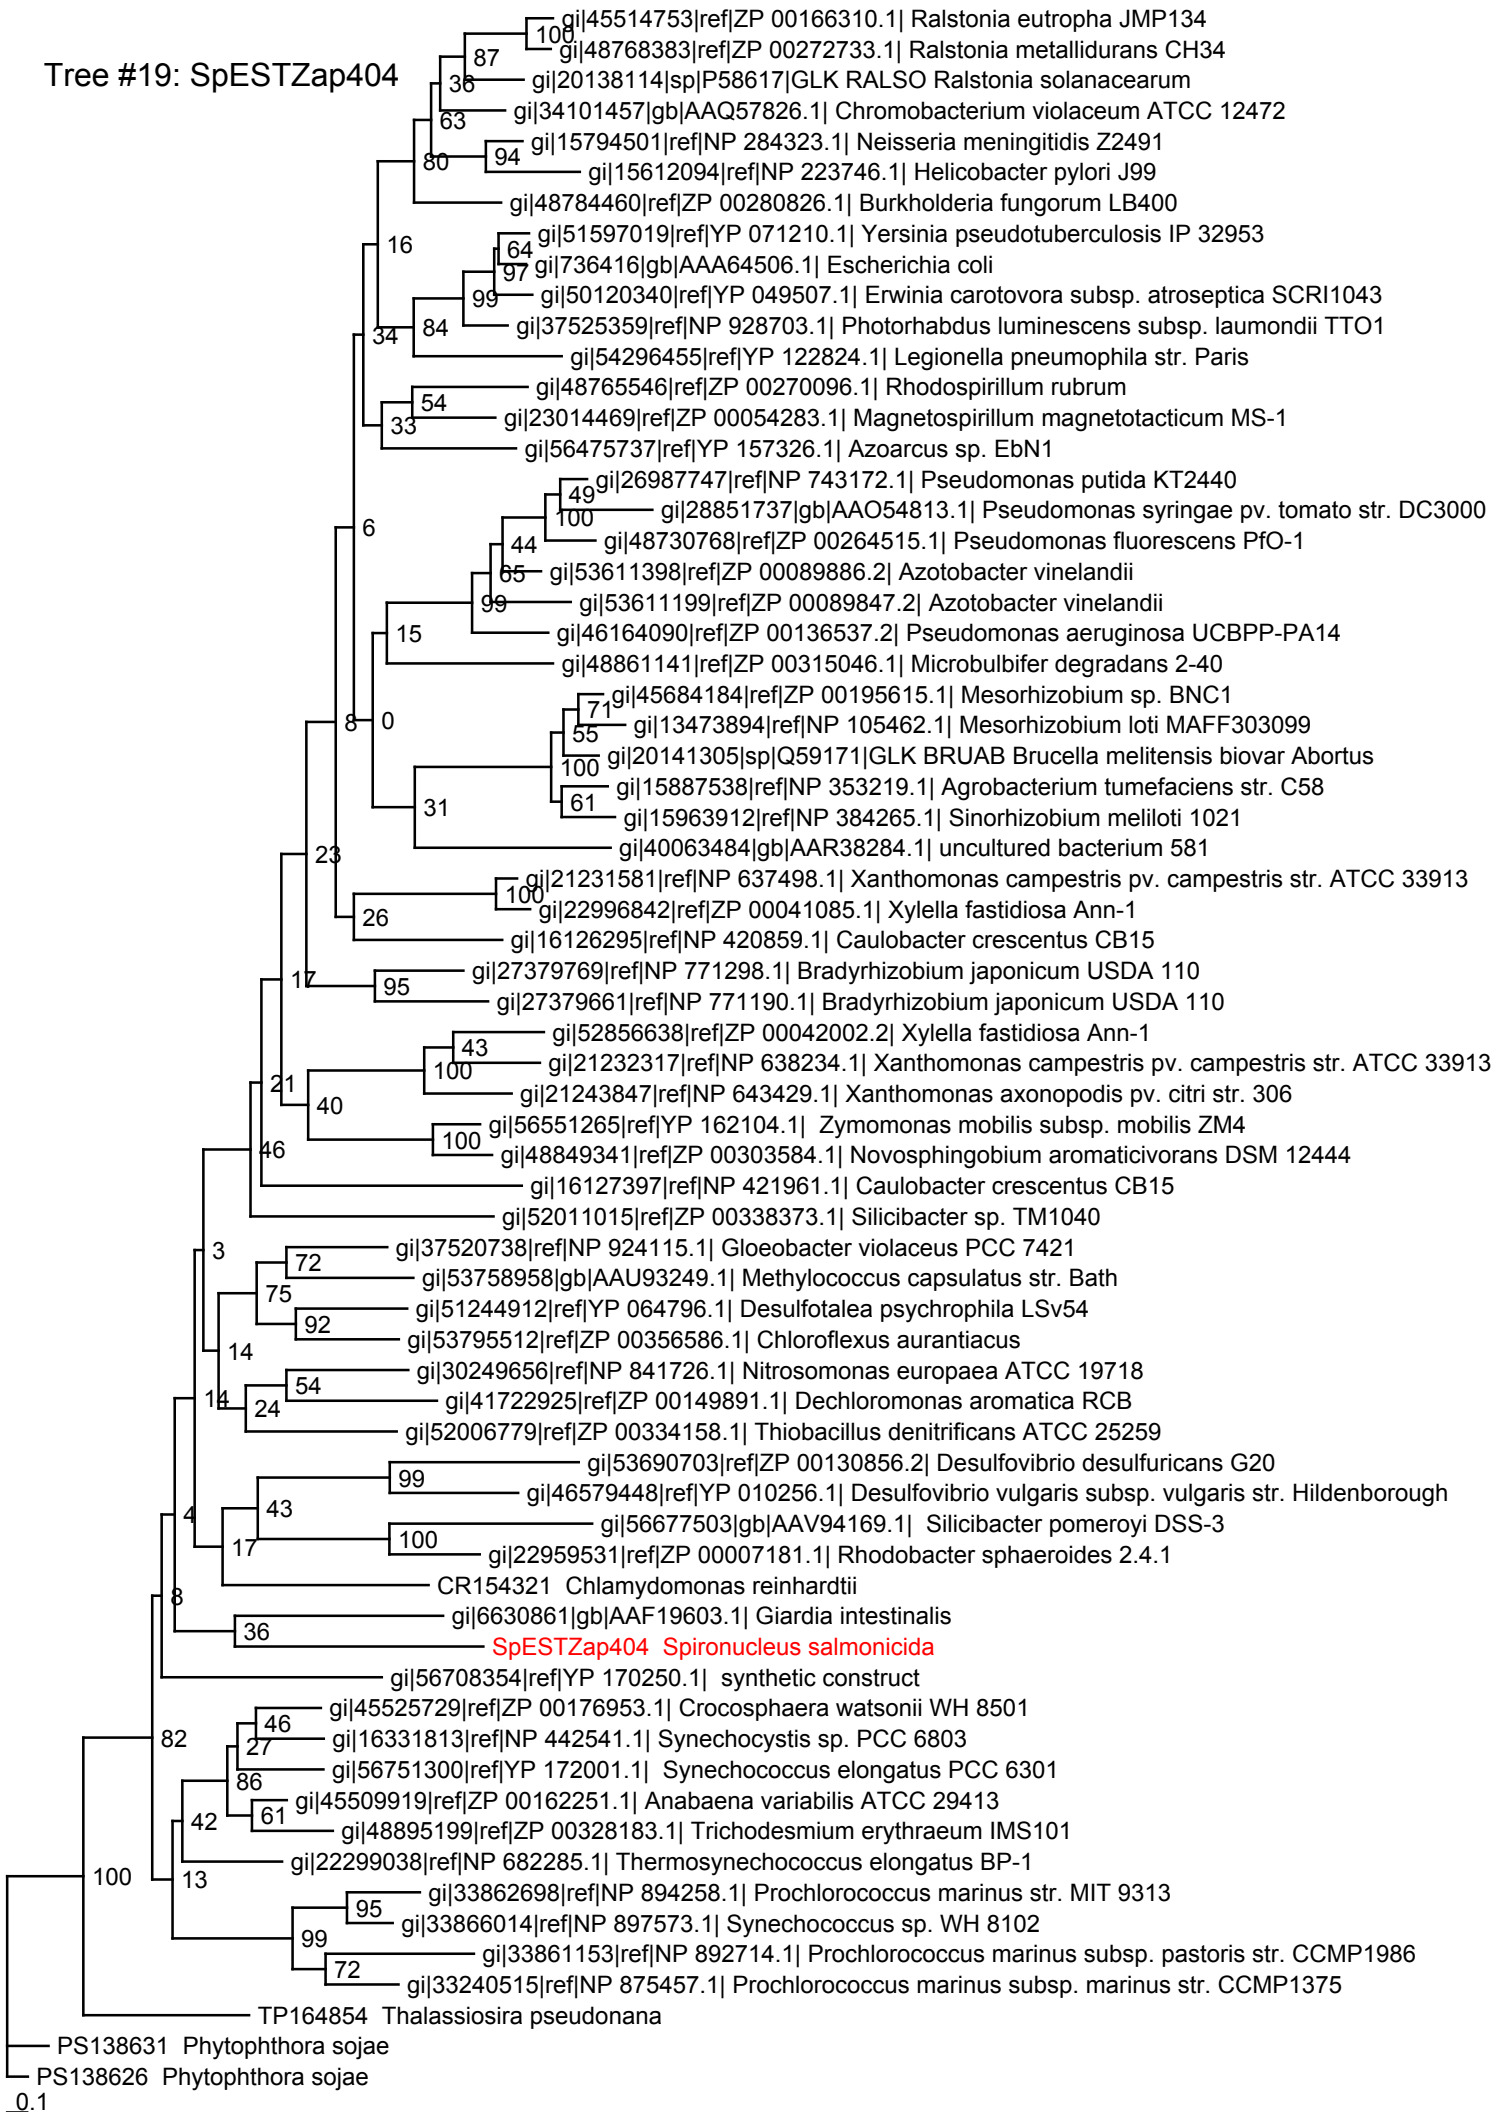



Tree #20: 18030018

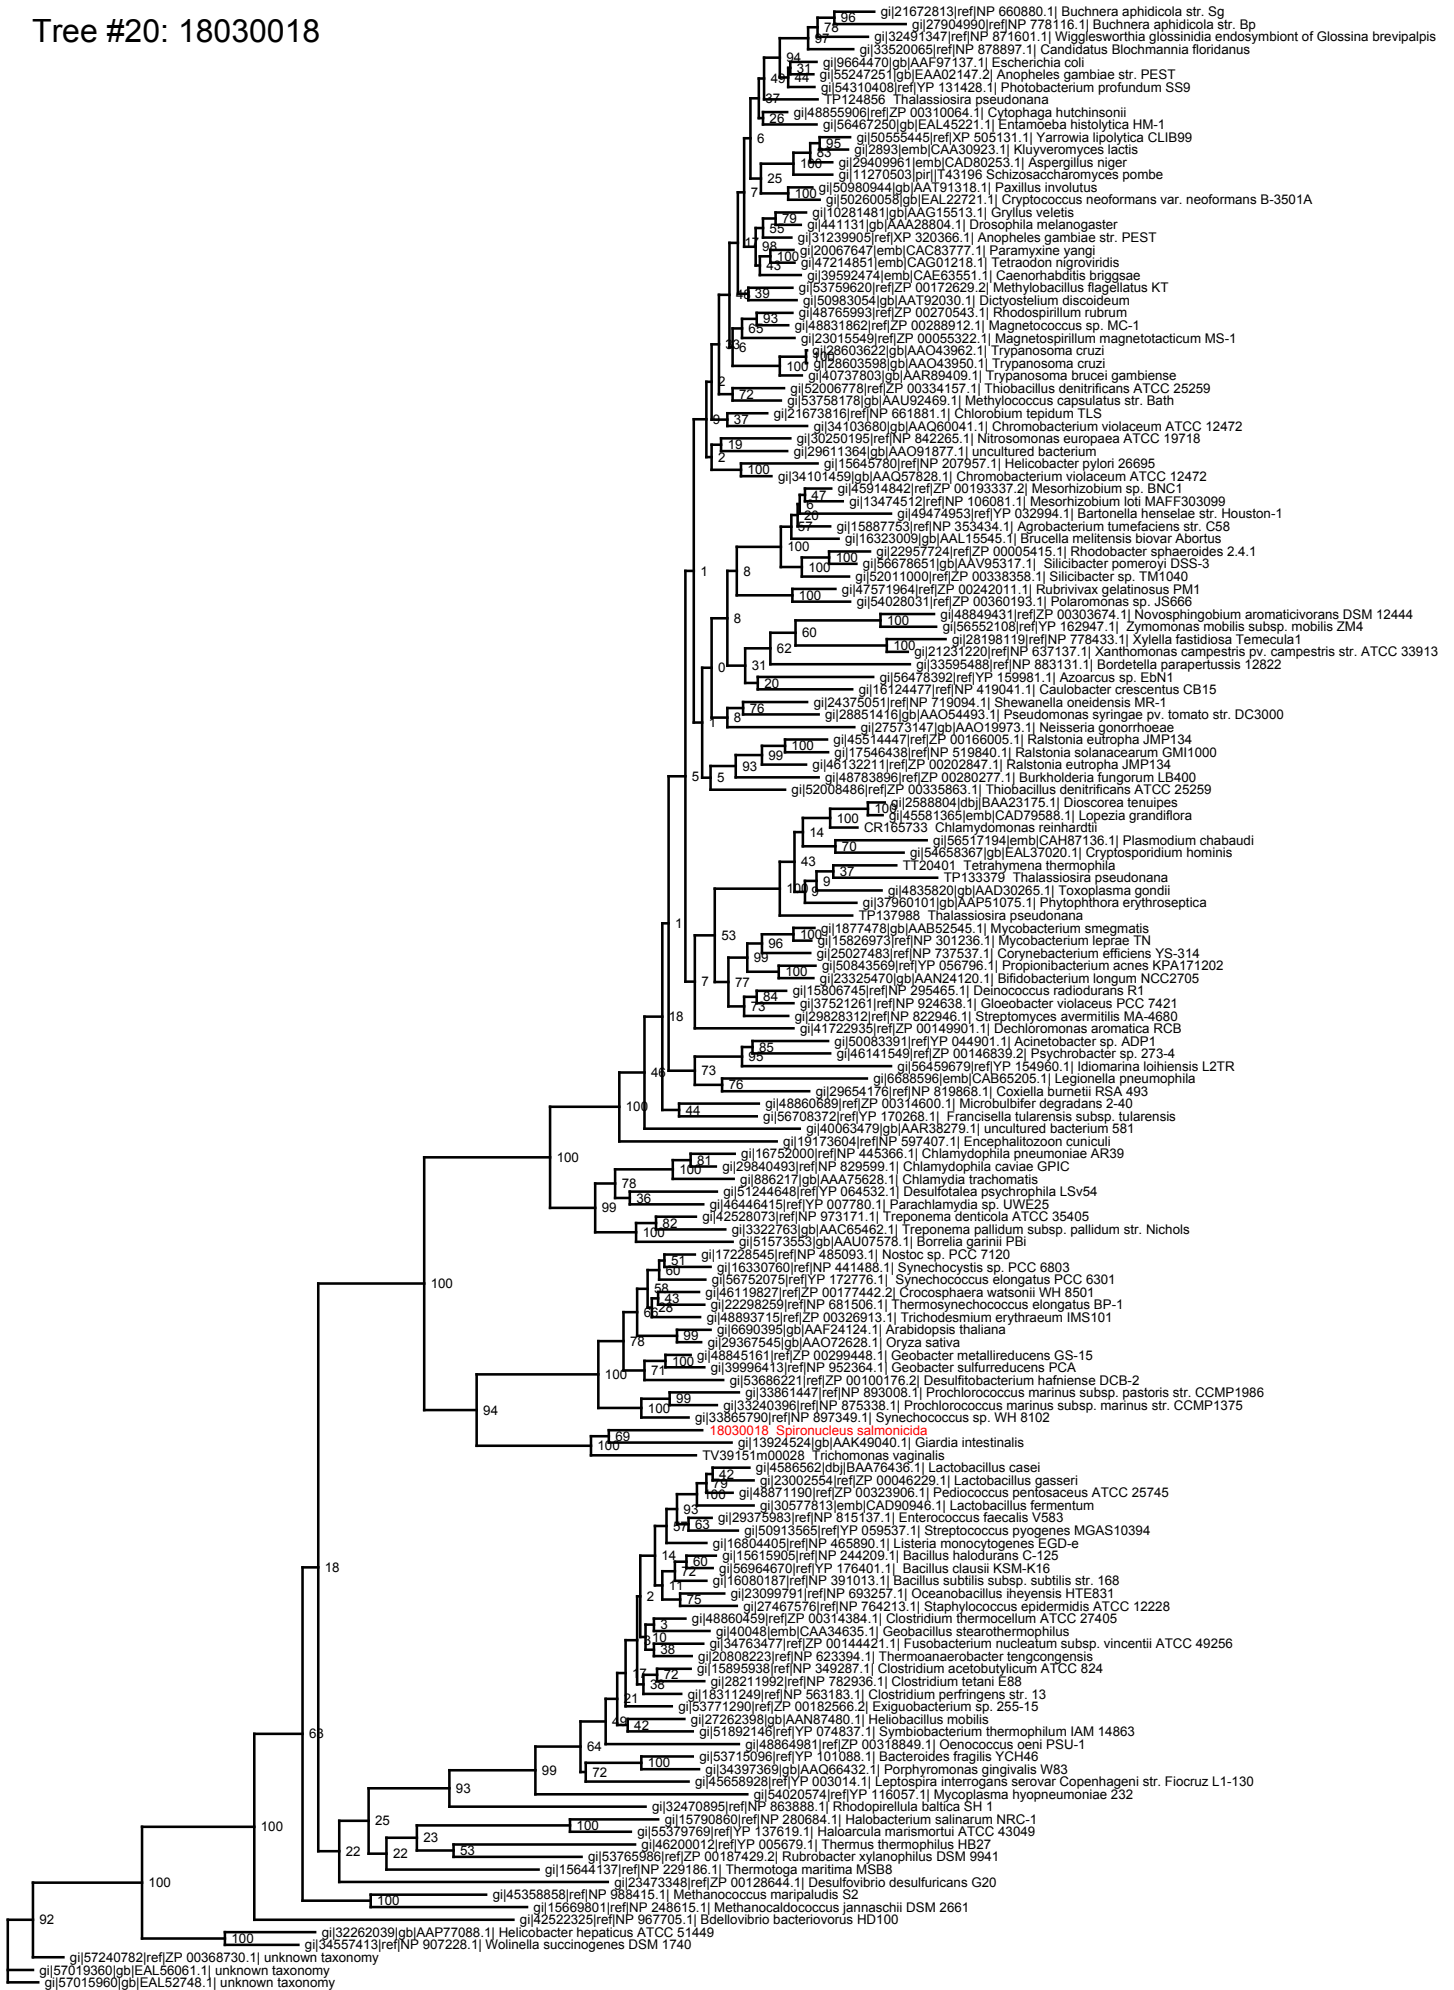



Tree #21: gTol047bMF

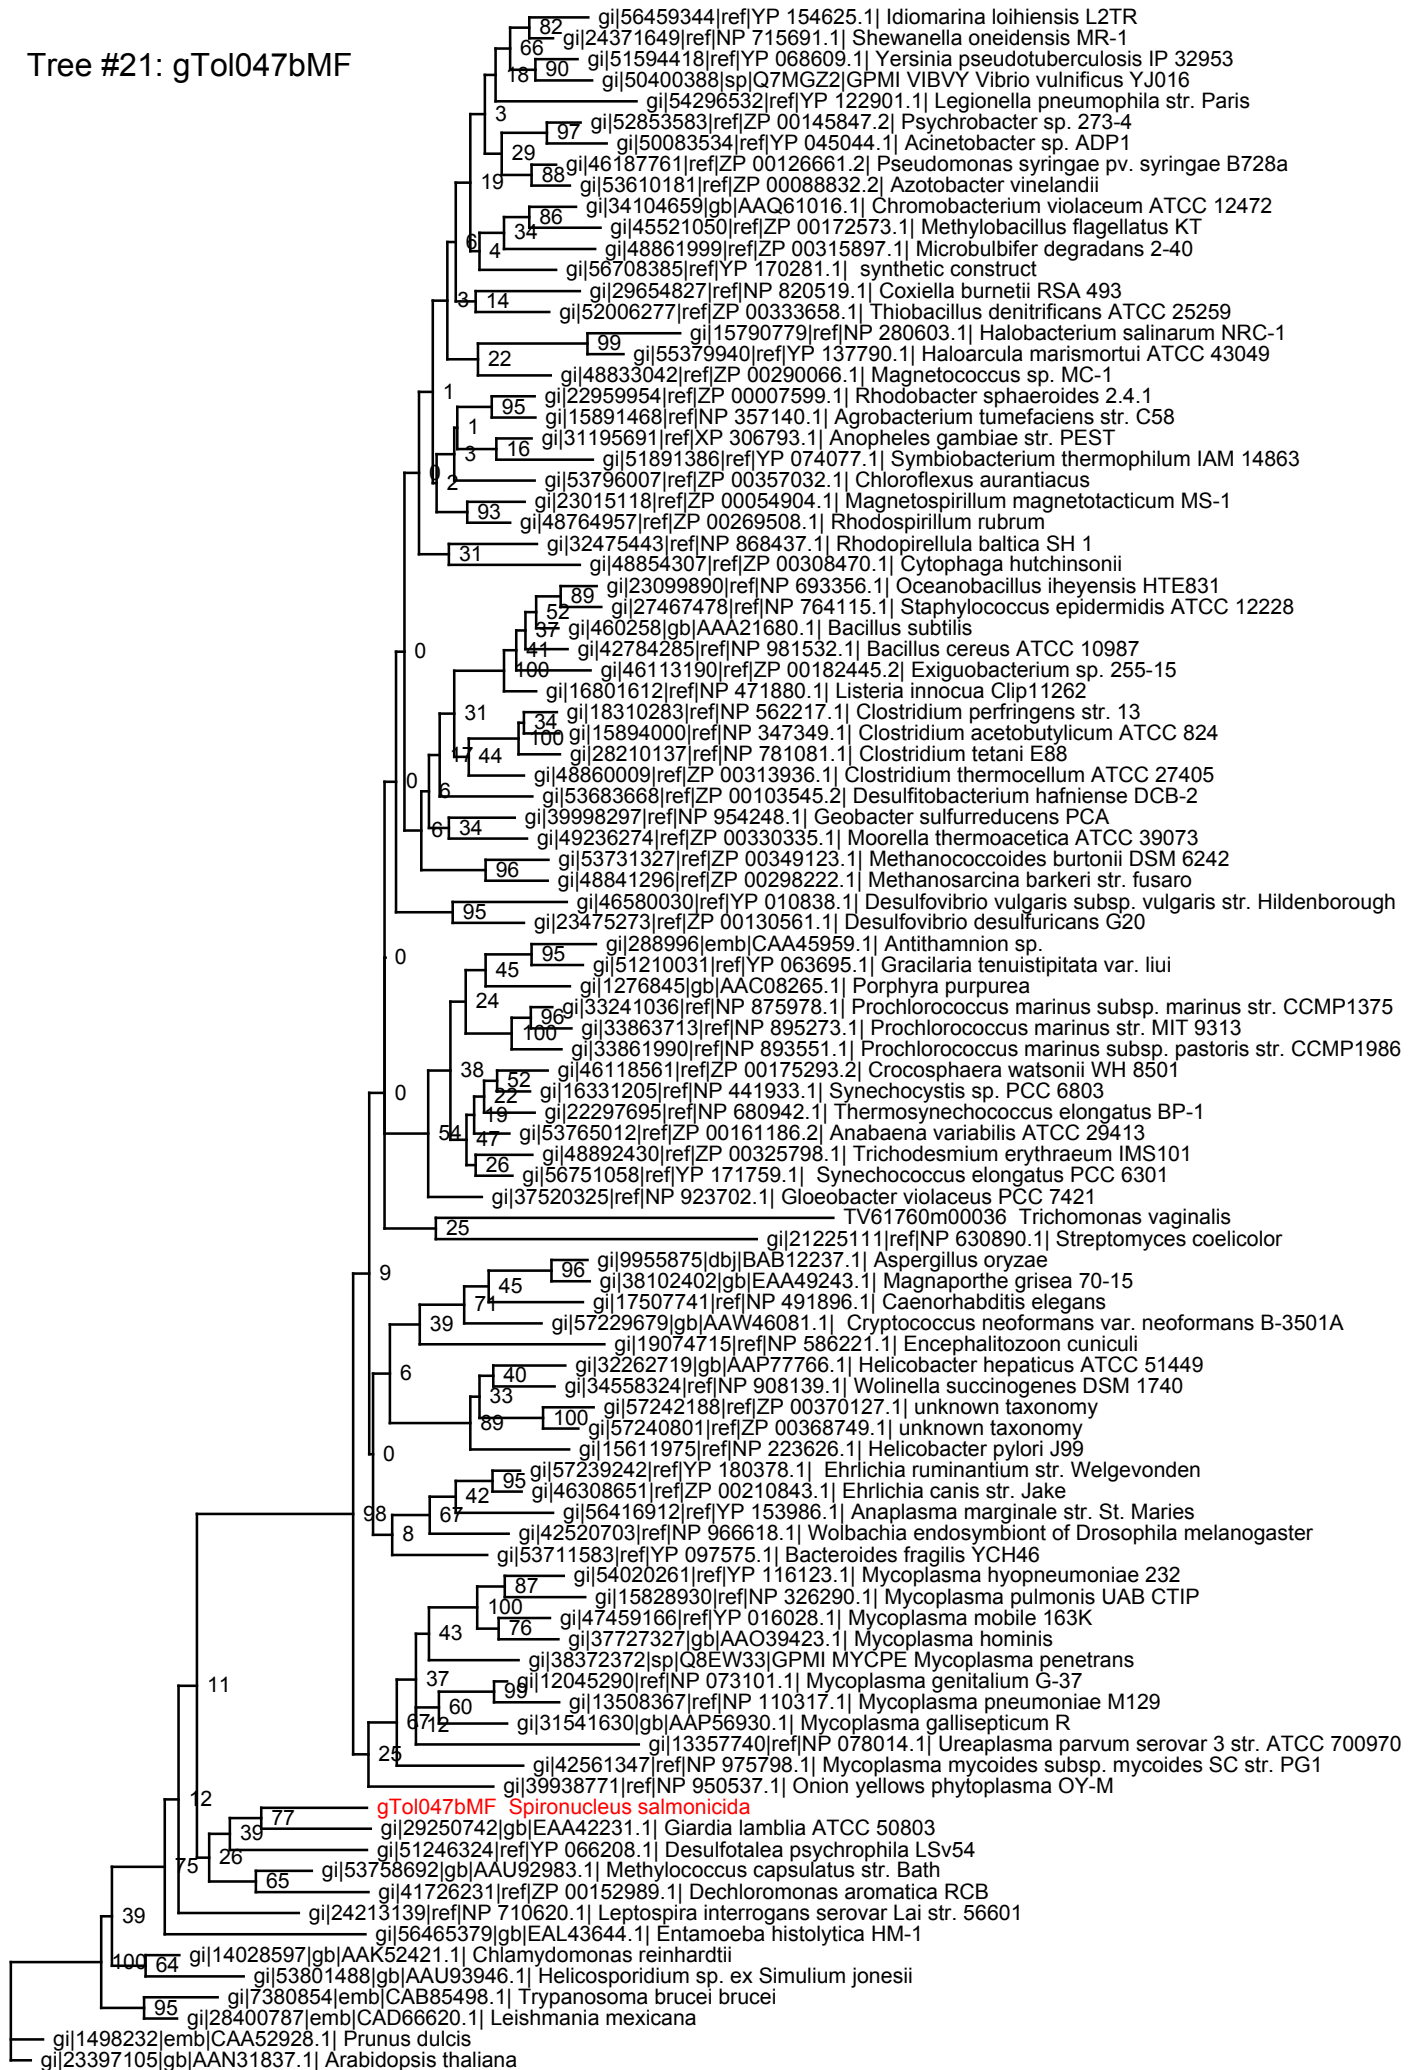

Tree #22: SpESTC275

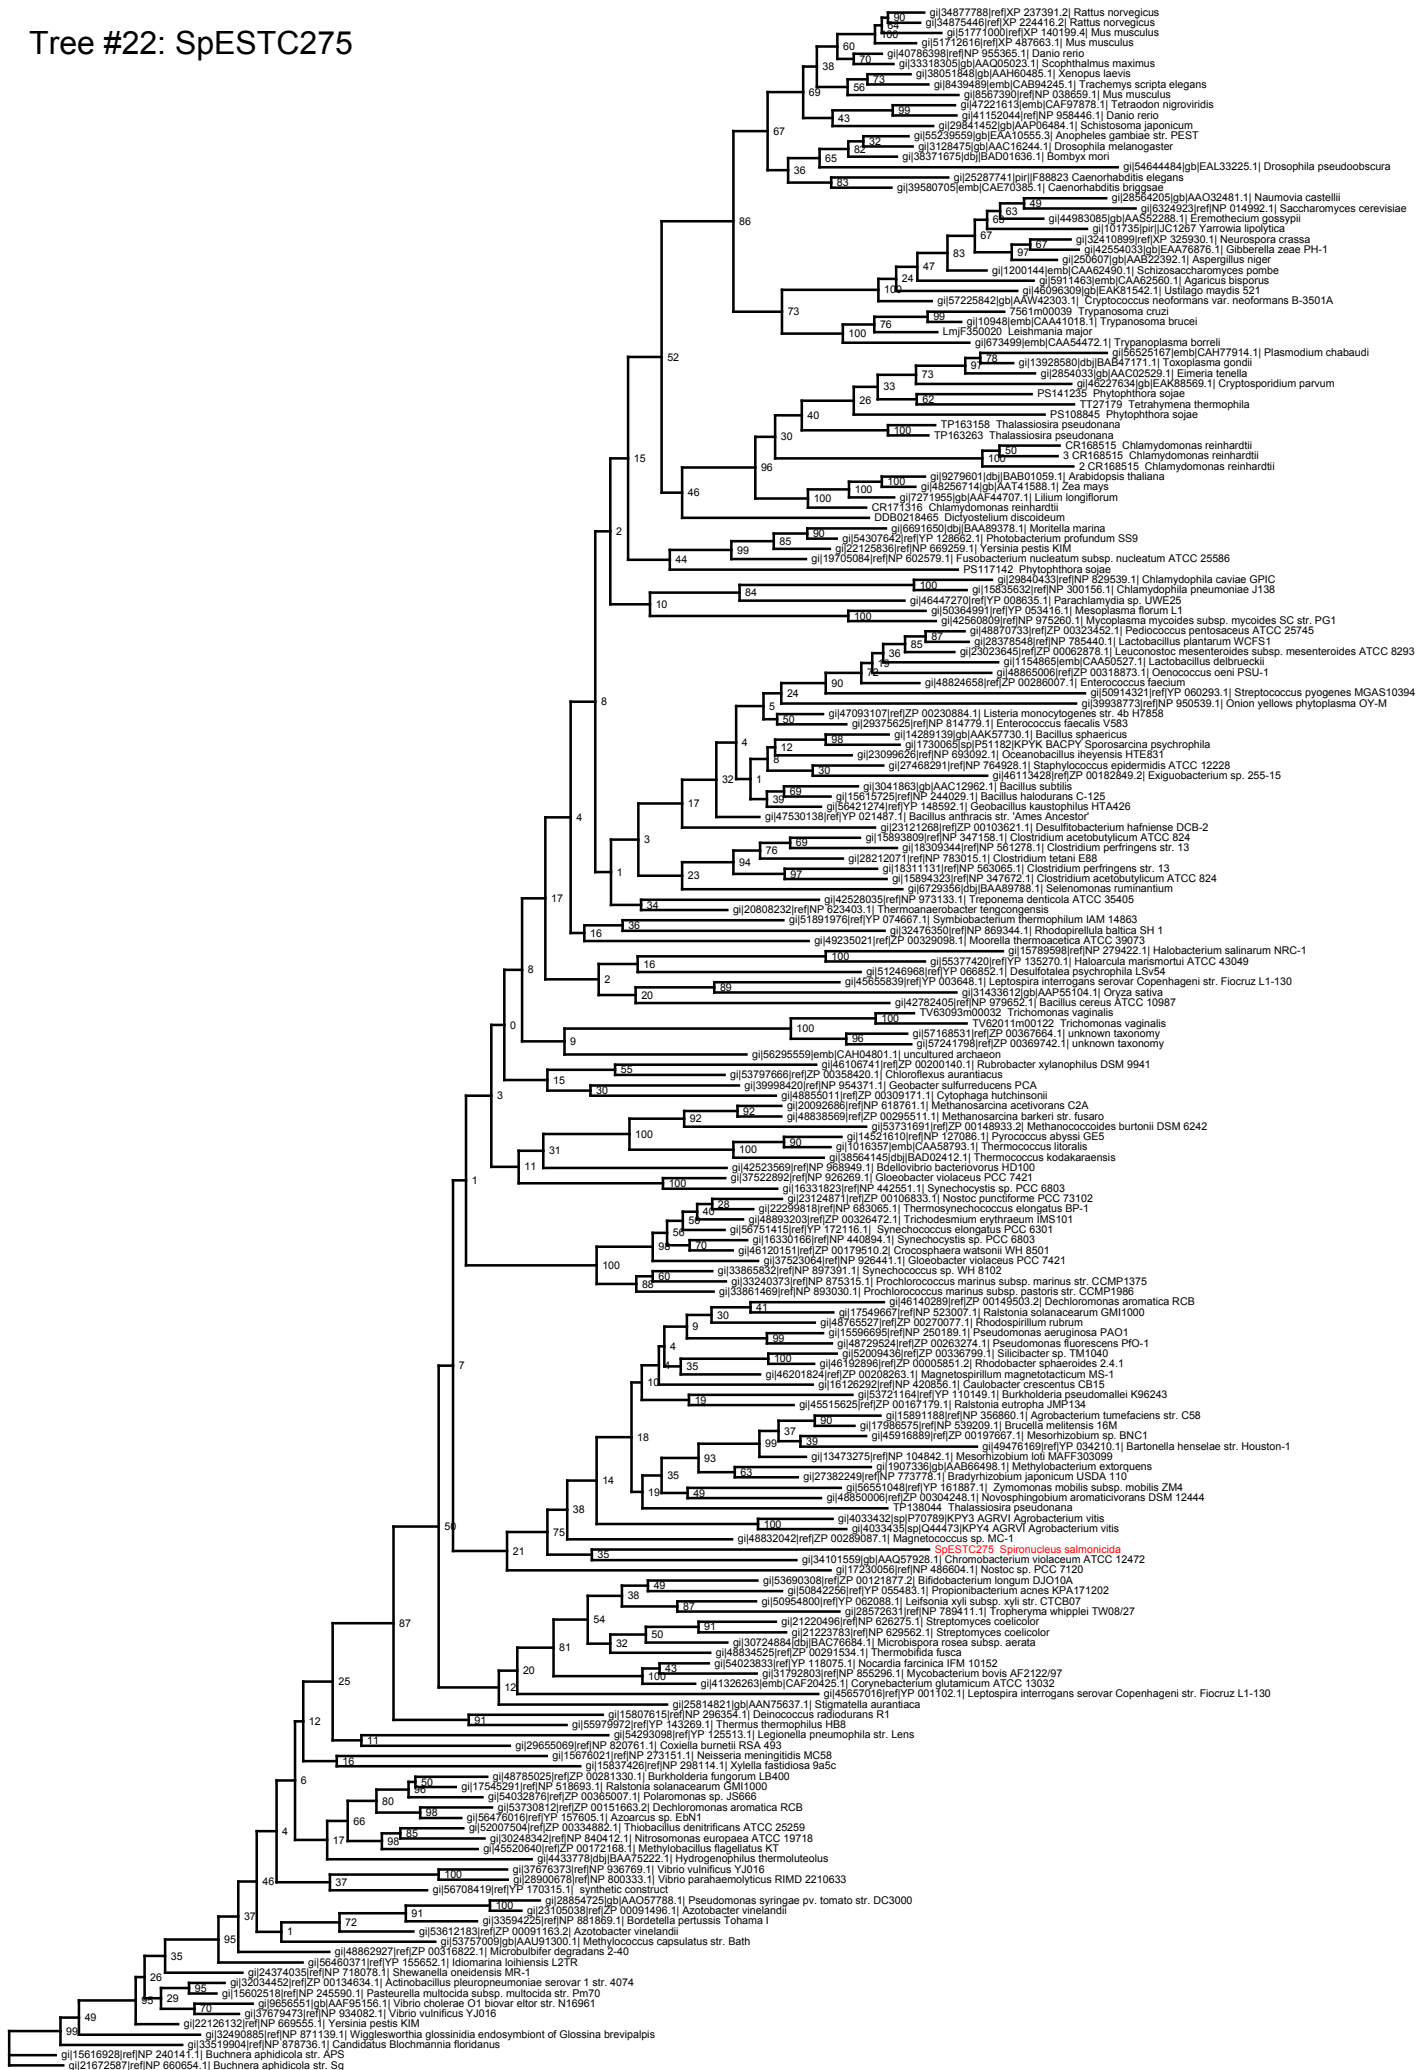

Tree #23: gTor983gT3

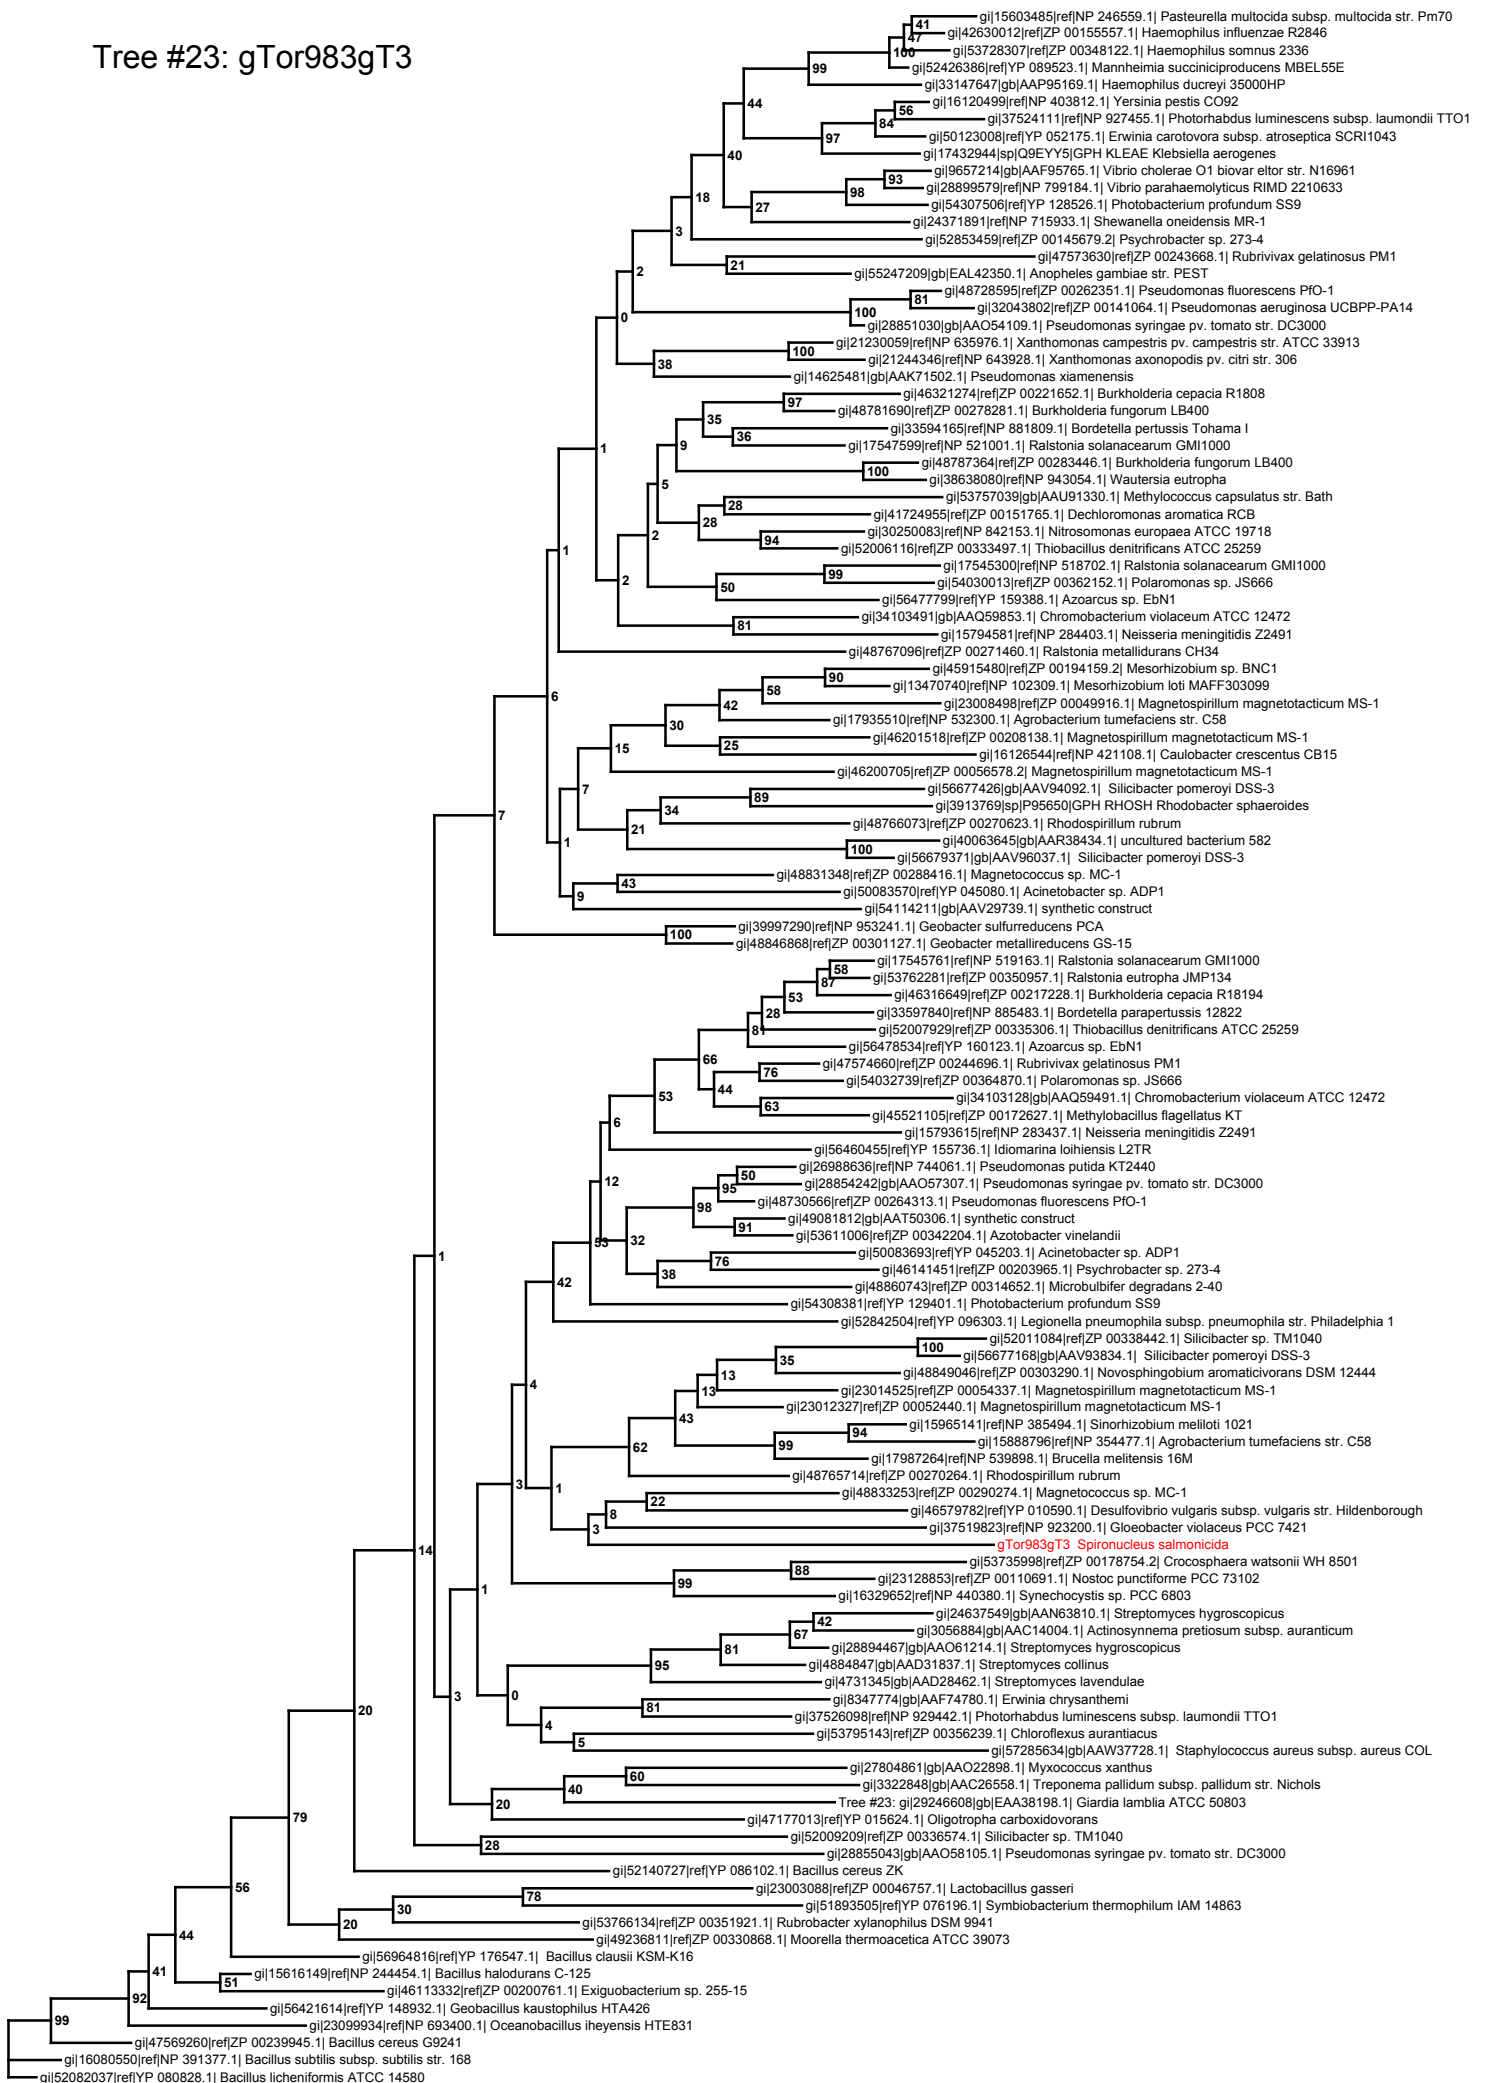



Tree #24: SpESTC23

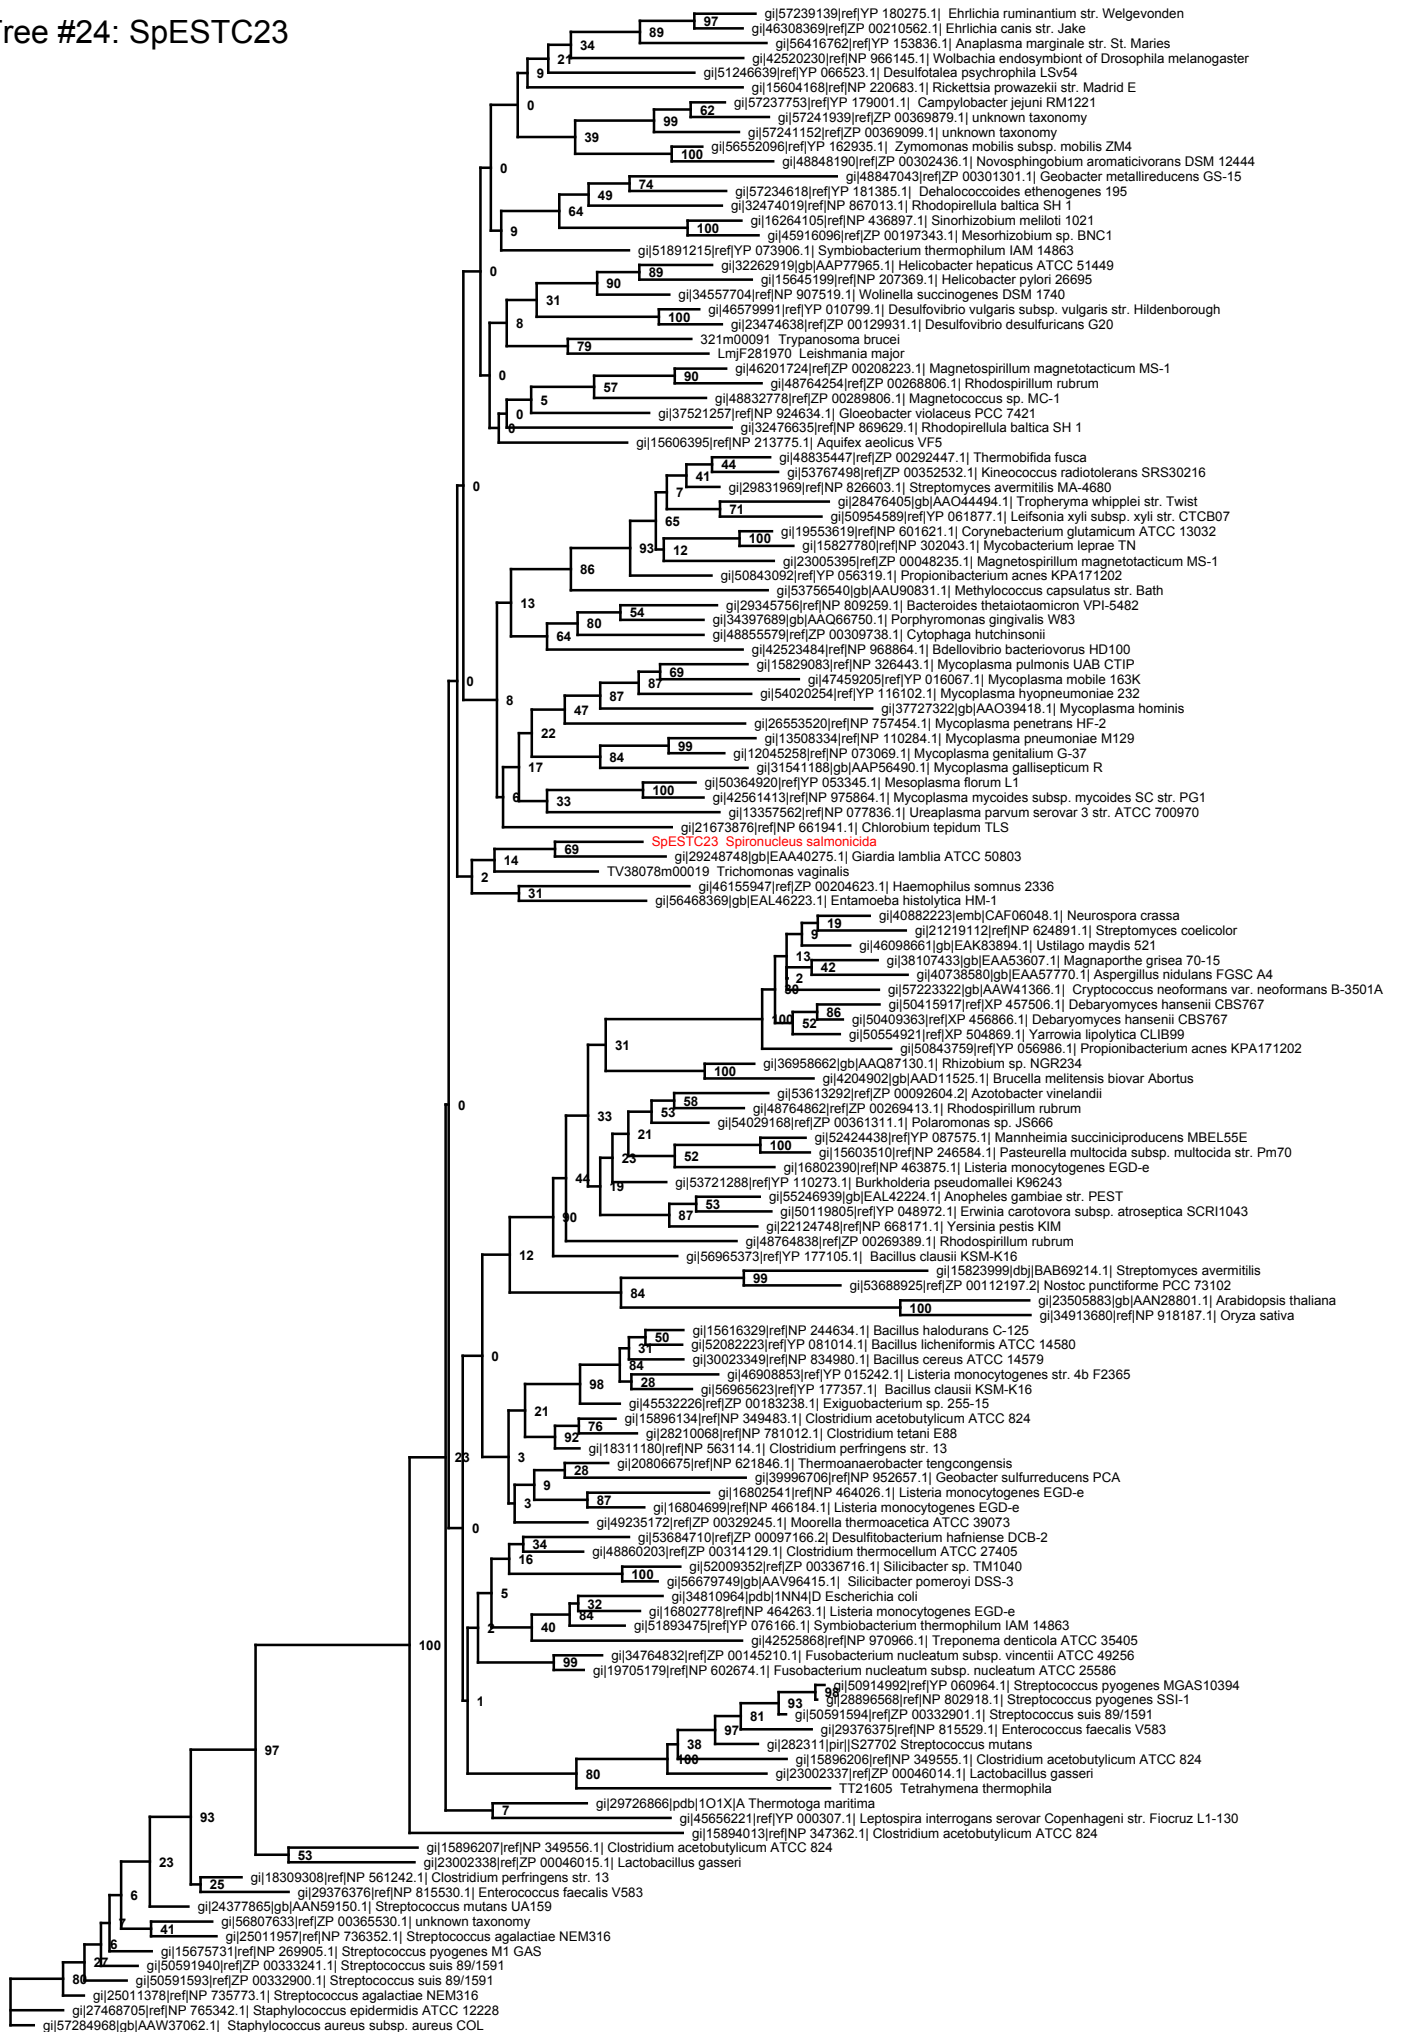



Tree #25: SpESTZap360

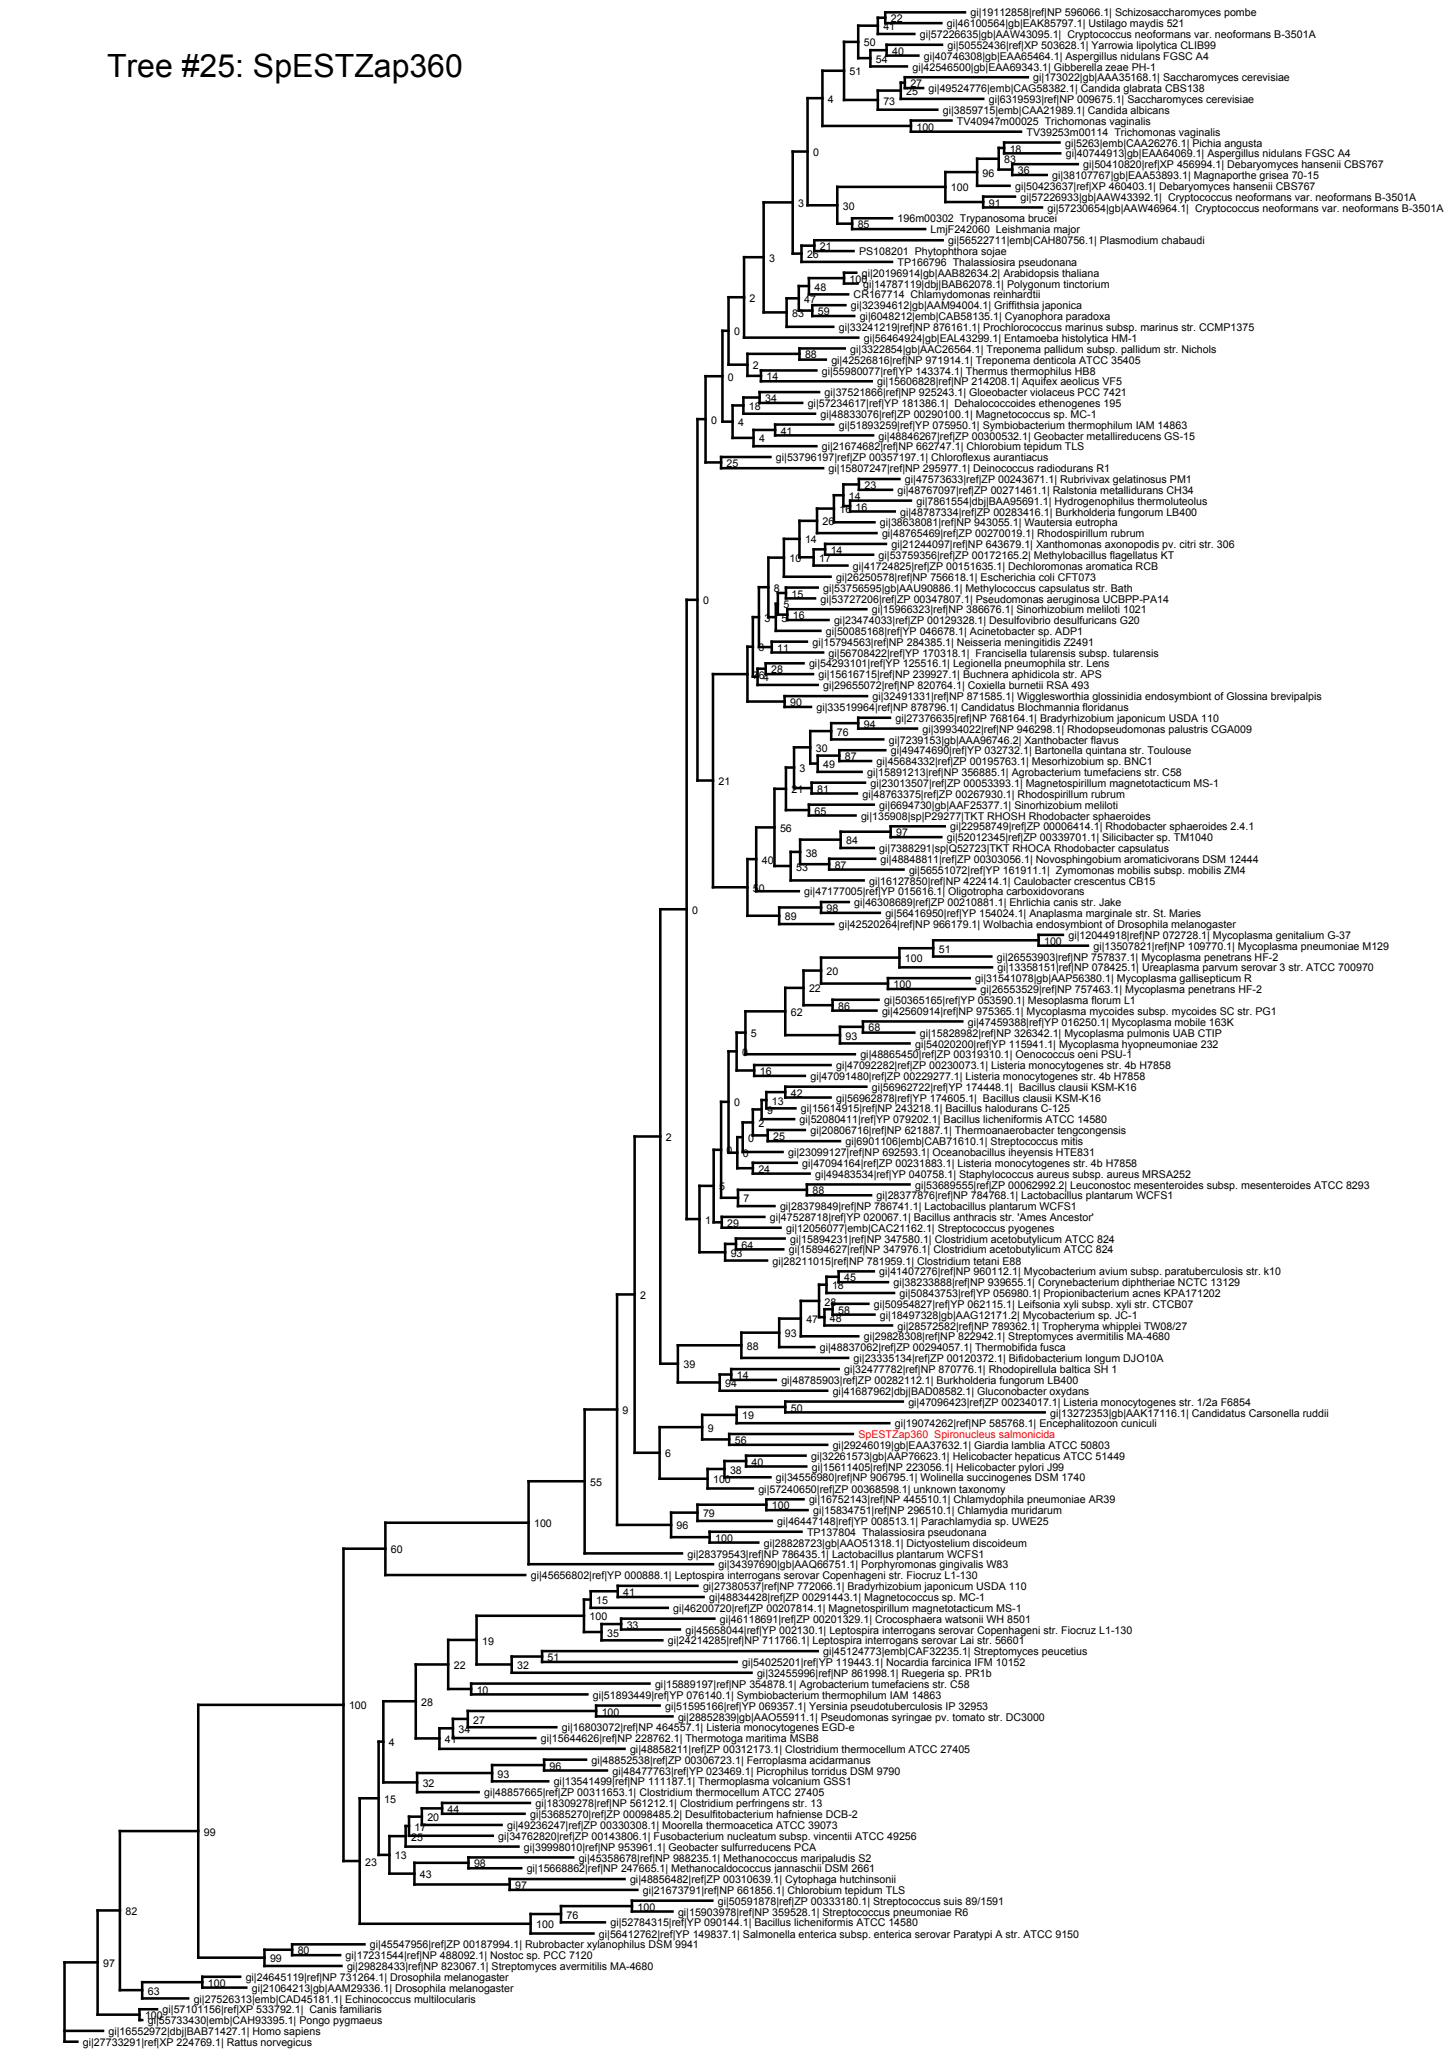

Supplement: 1471-2164-8-51-S4.pdf [file 1471-2164-8-51-S4.pdf]
