# Supplementary material for: A genomic survey of the fish parasite Spironucleus salmonicida indicates genomic plasticity among diplomonads and significant lateral gene transfer in eukaryote genome evolution
Source: PubMed Central journal article supplement (PMC1805757; doi:10.1186/1471-2164-8-51), 2007-02-14

**Additional file 5 - Andersson et al.**

Phylogenetic trees 26-50 for genes putatively involved in LGT events and listed in Additional file 3.

Tree #26: gZap797bT7

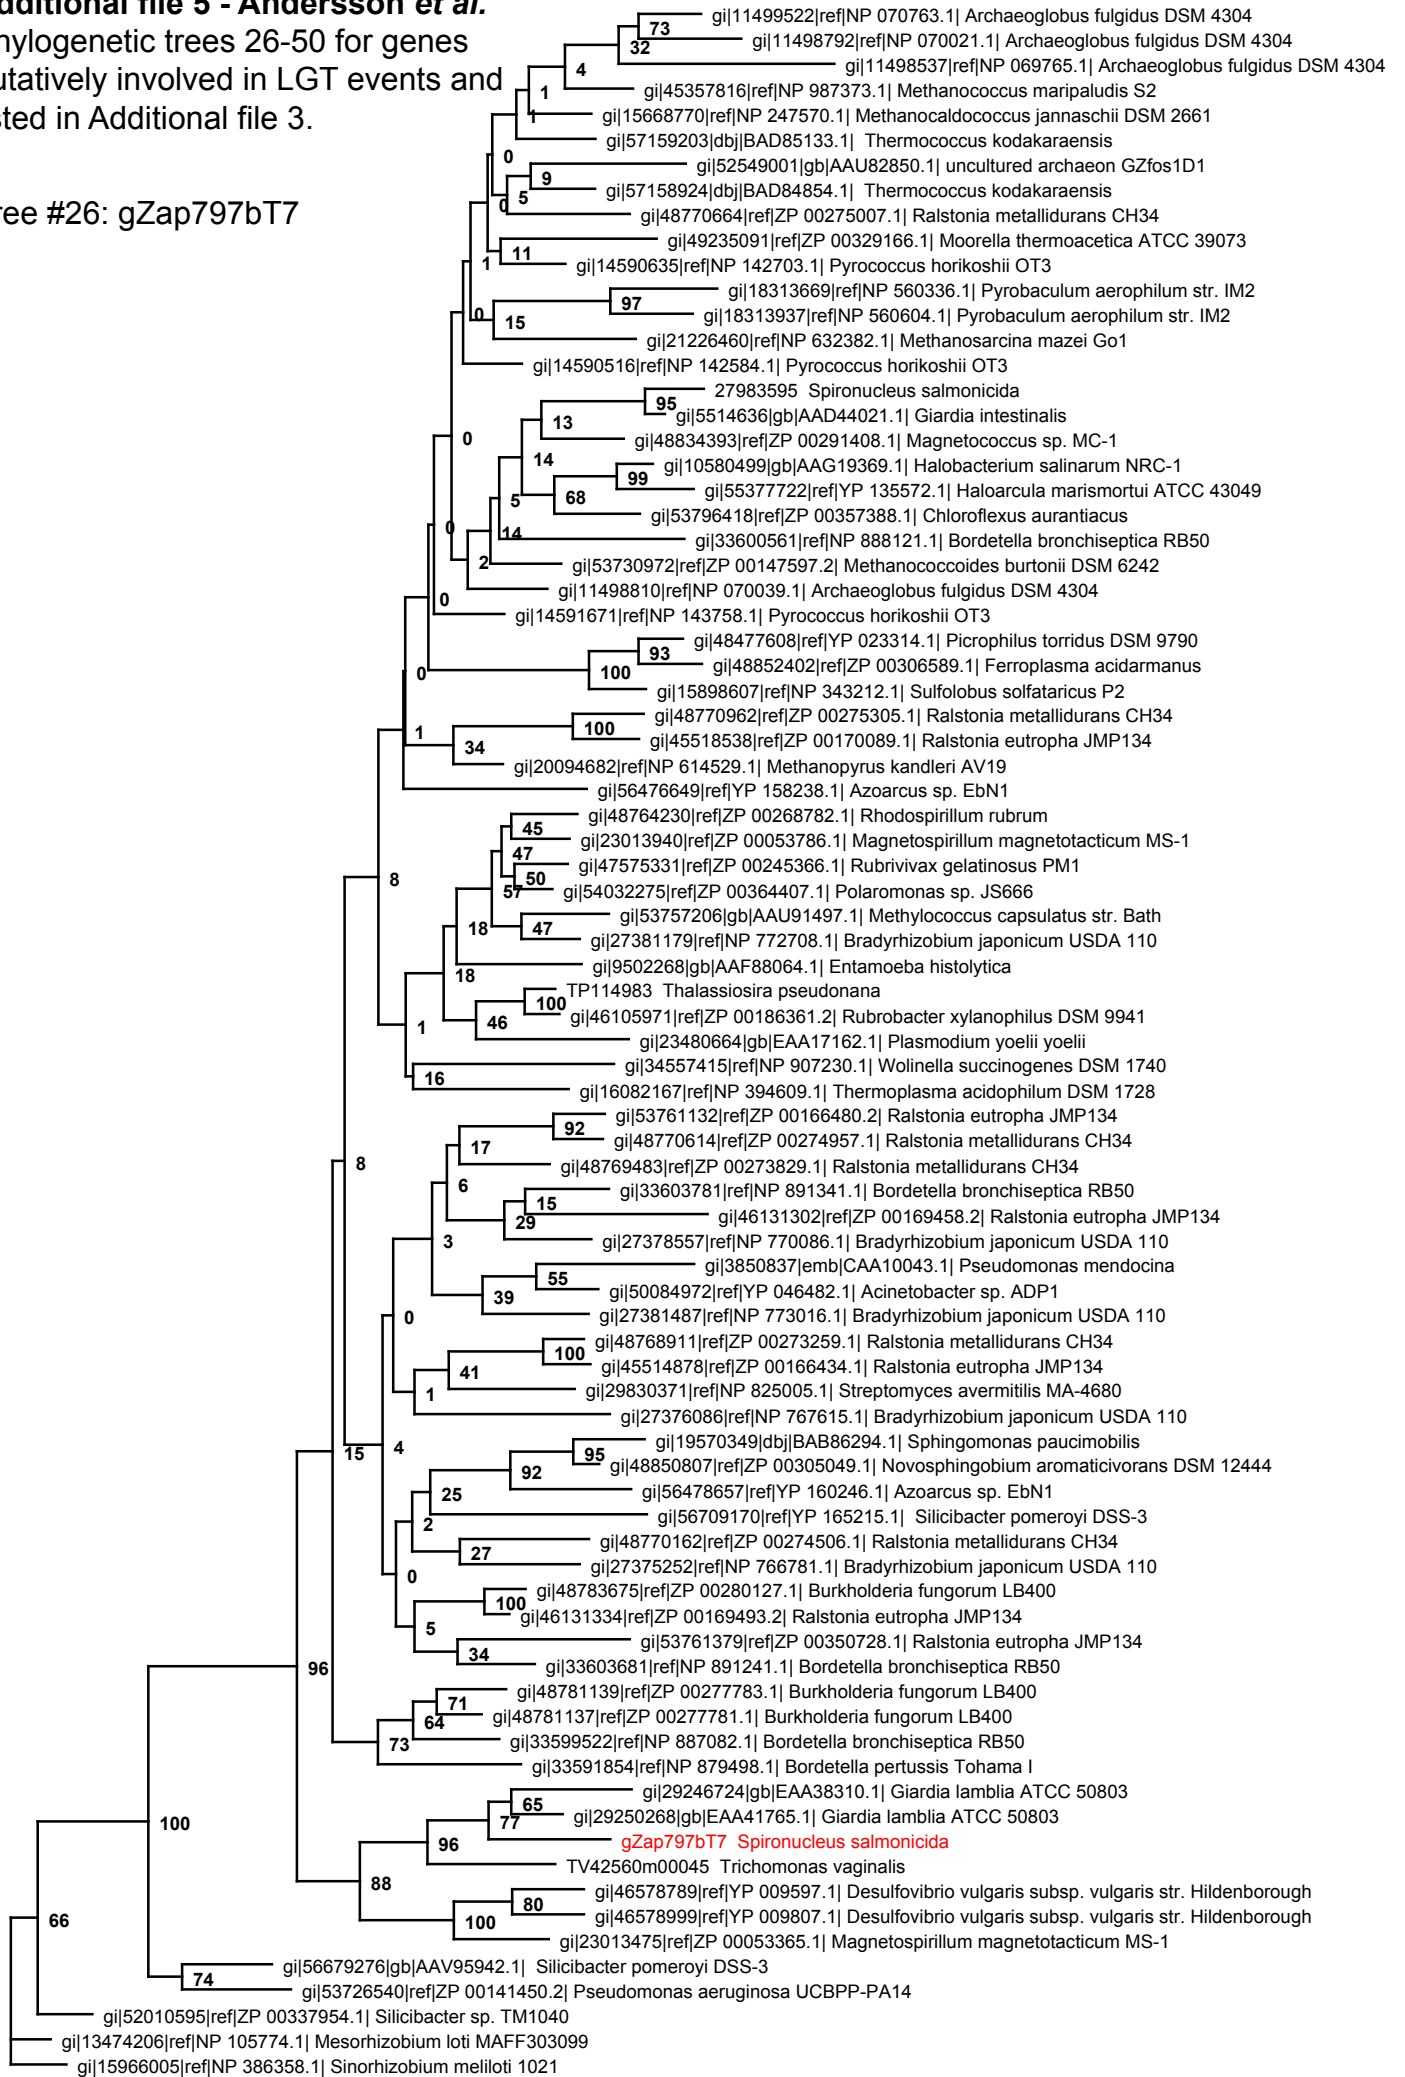

Tree #27: gZap472bT7, SpESTZap1028

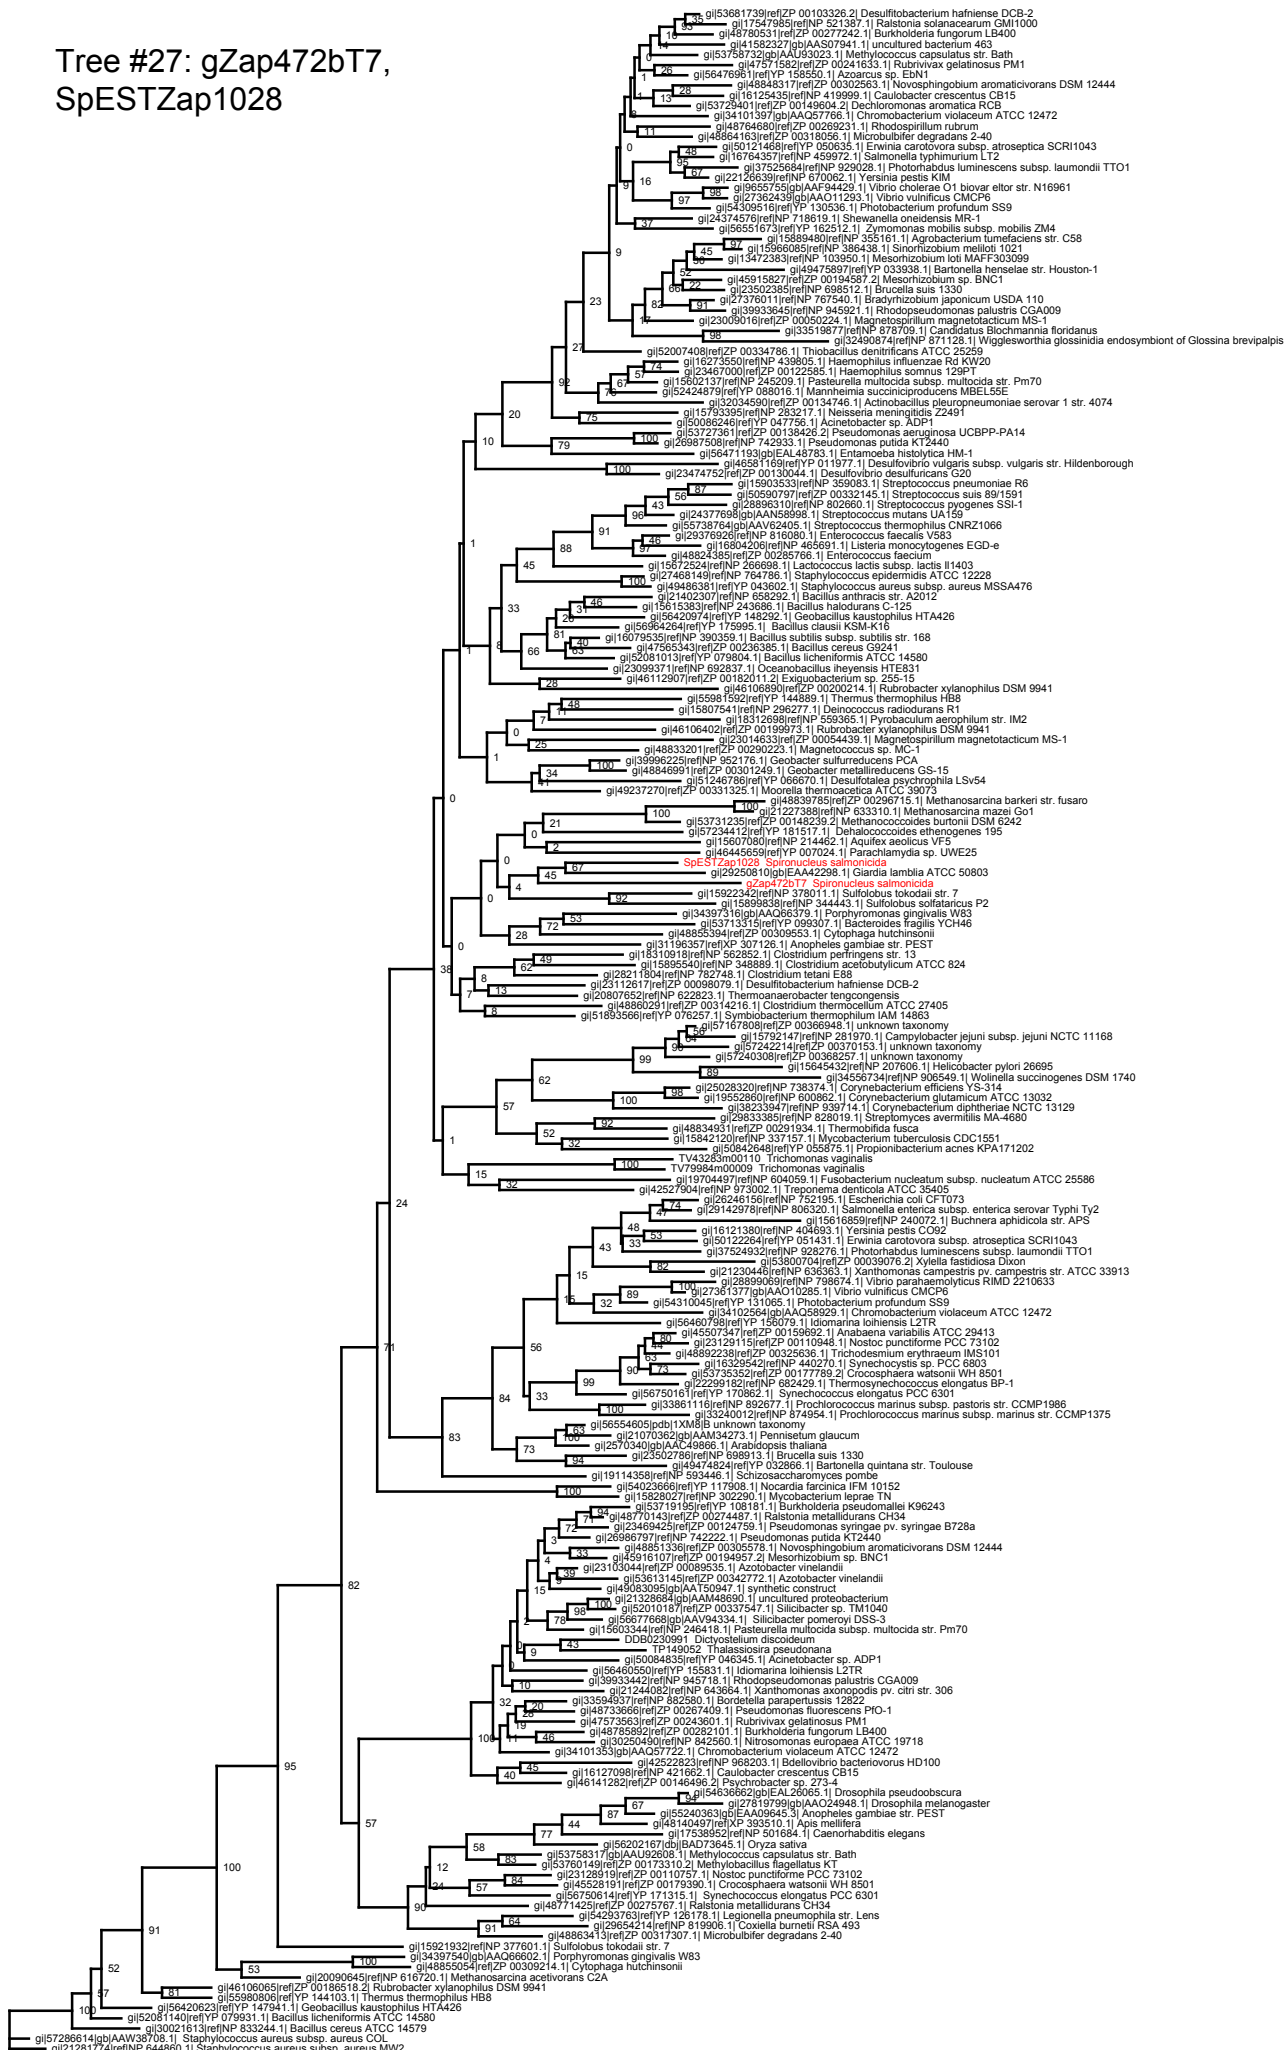

Tree #28: SpESTC94

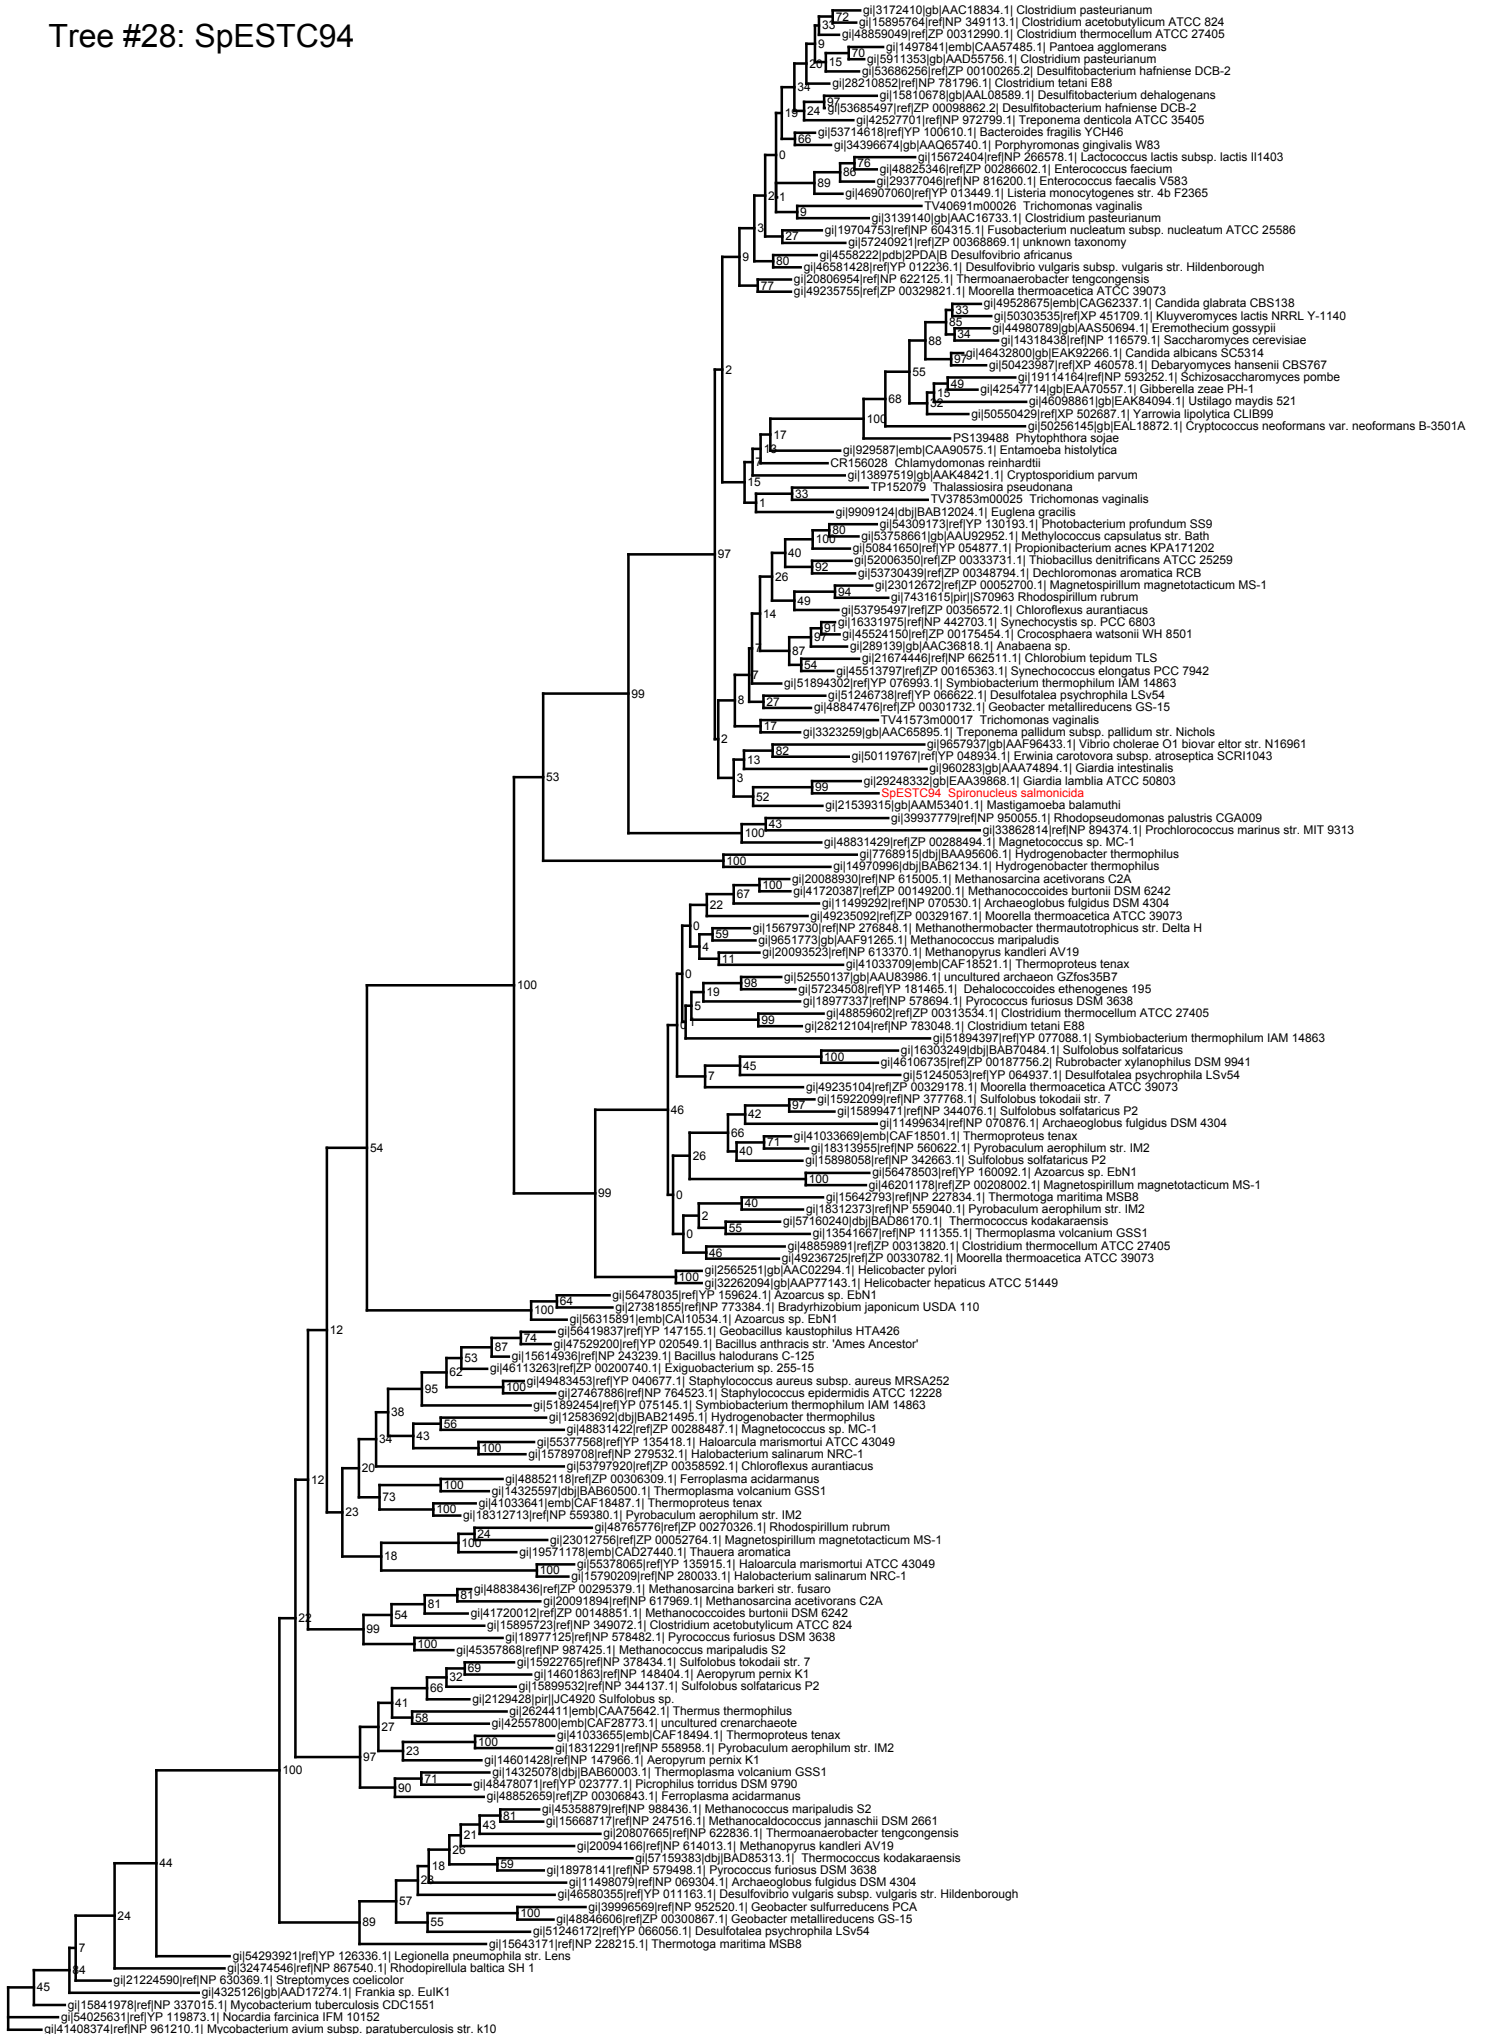

Tree #29: gZap510gT3

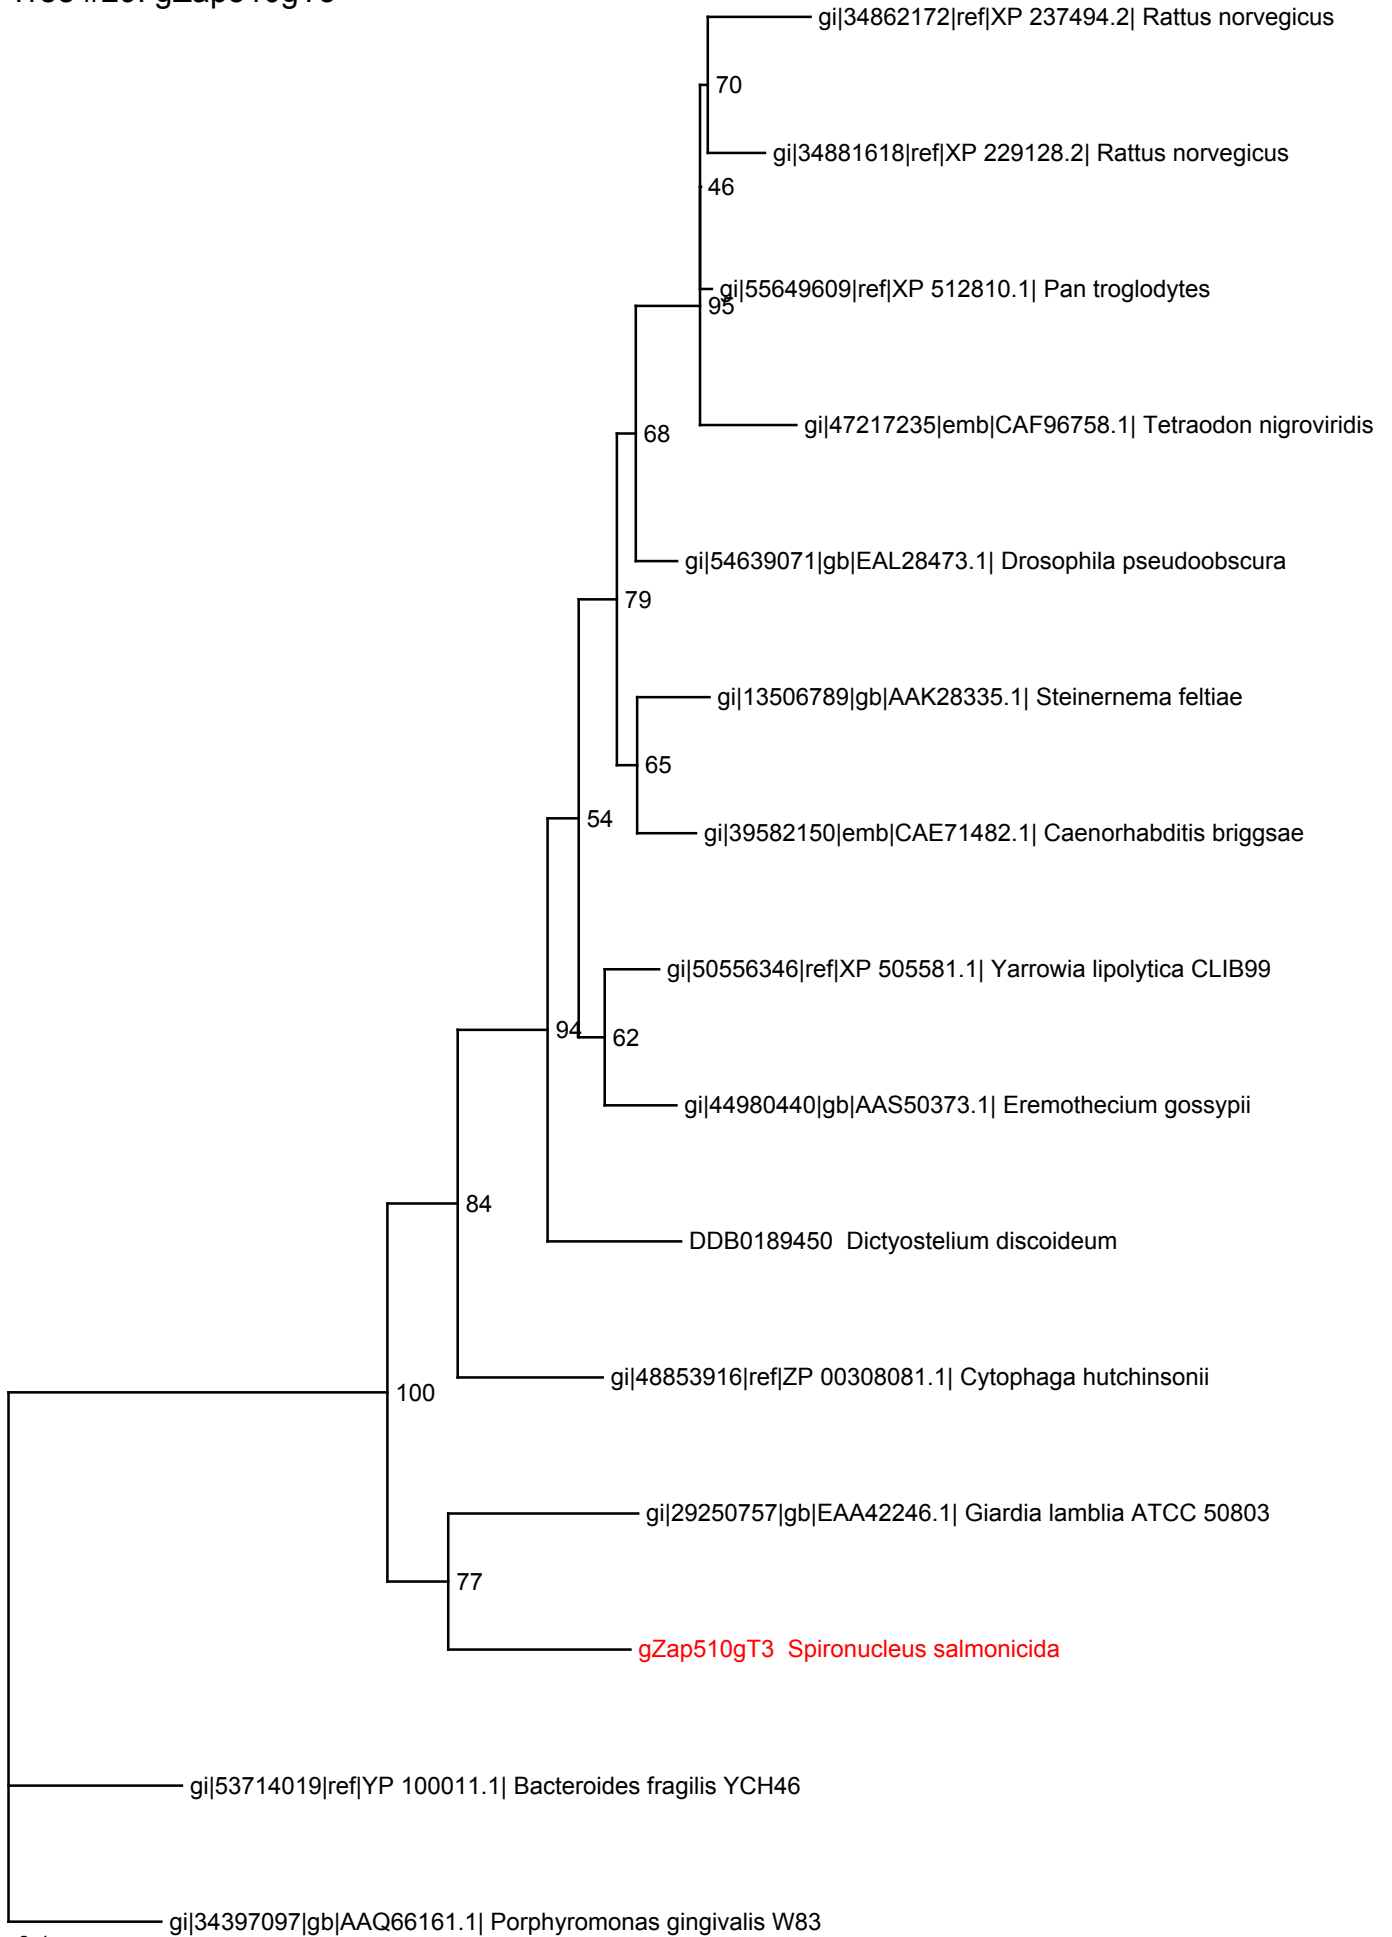

0.1

Tree #30: SpESTC239

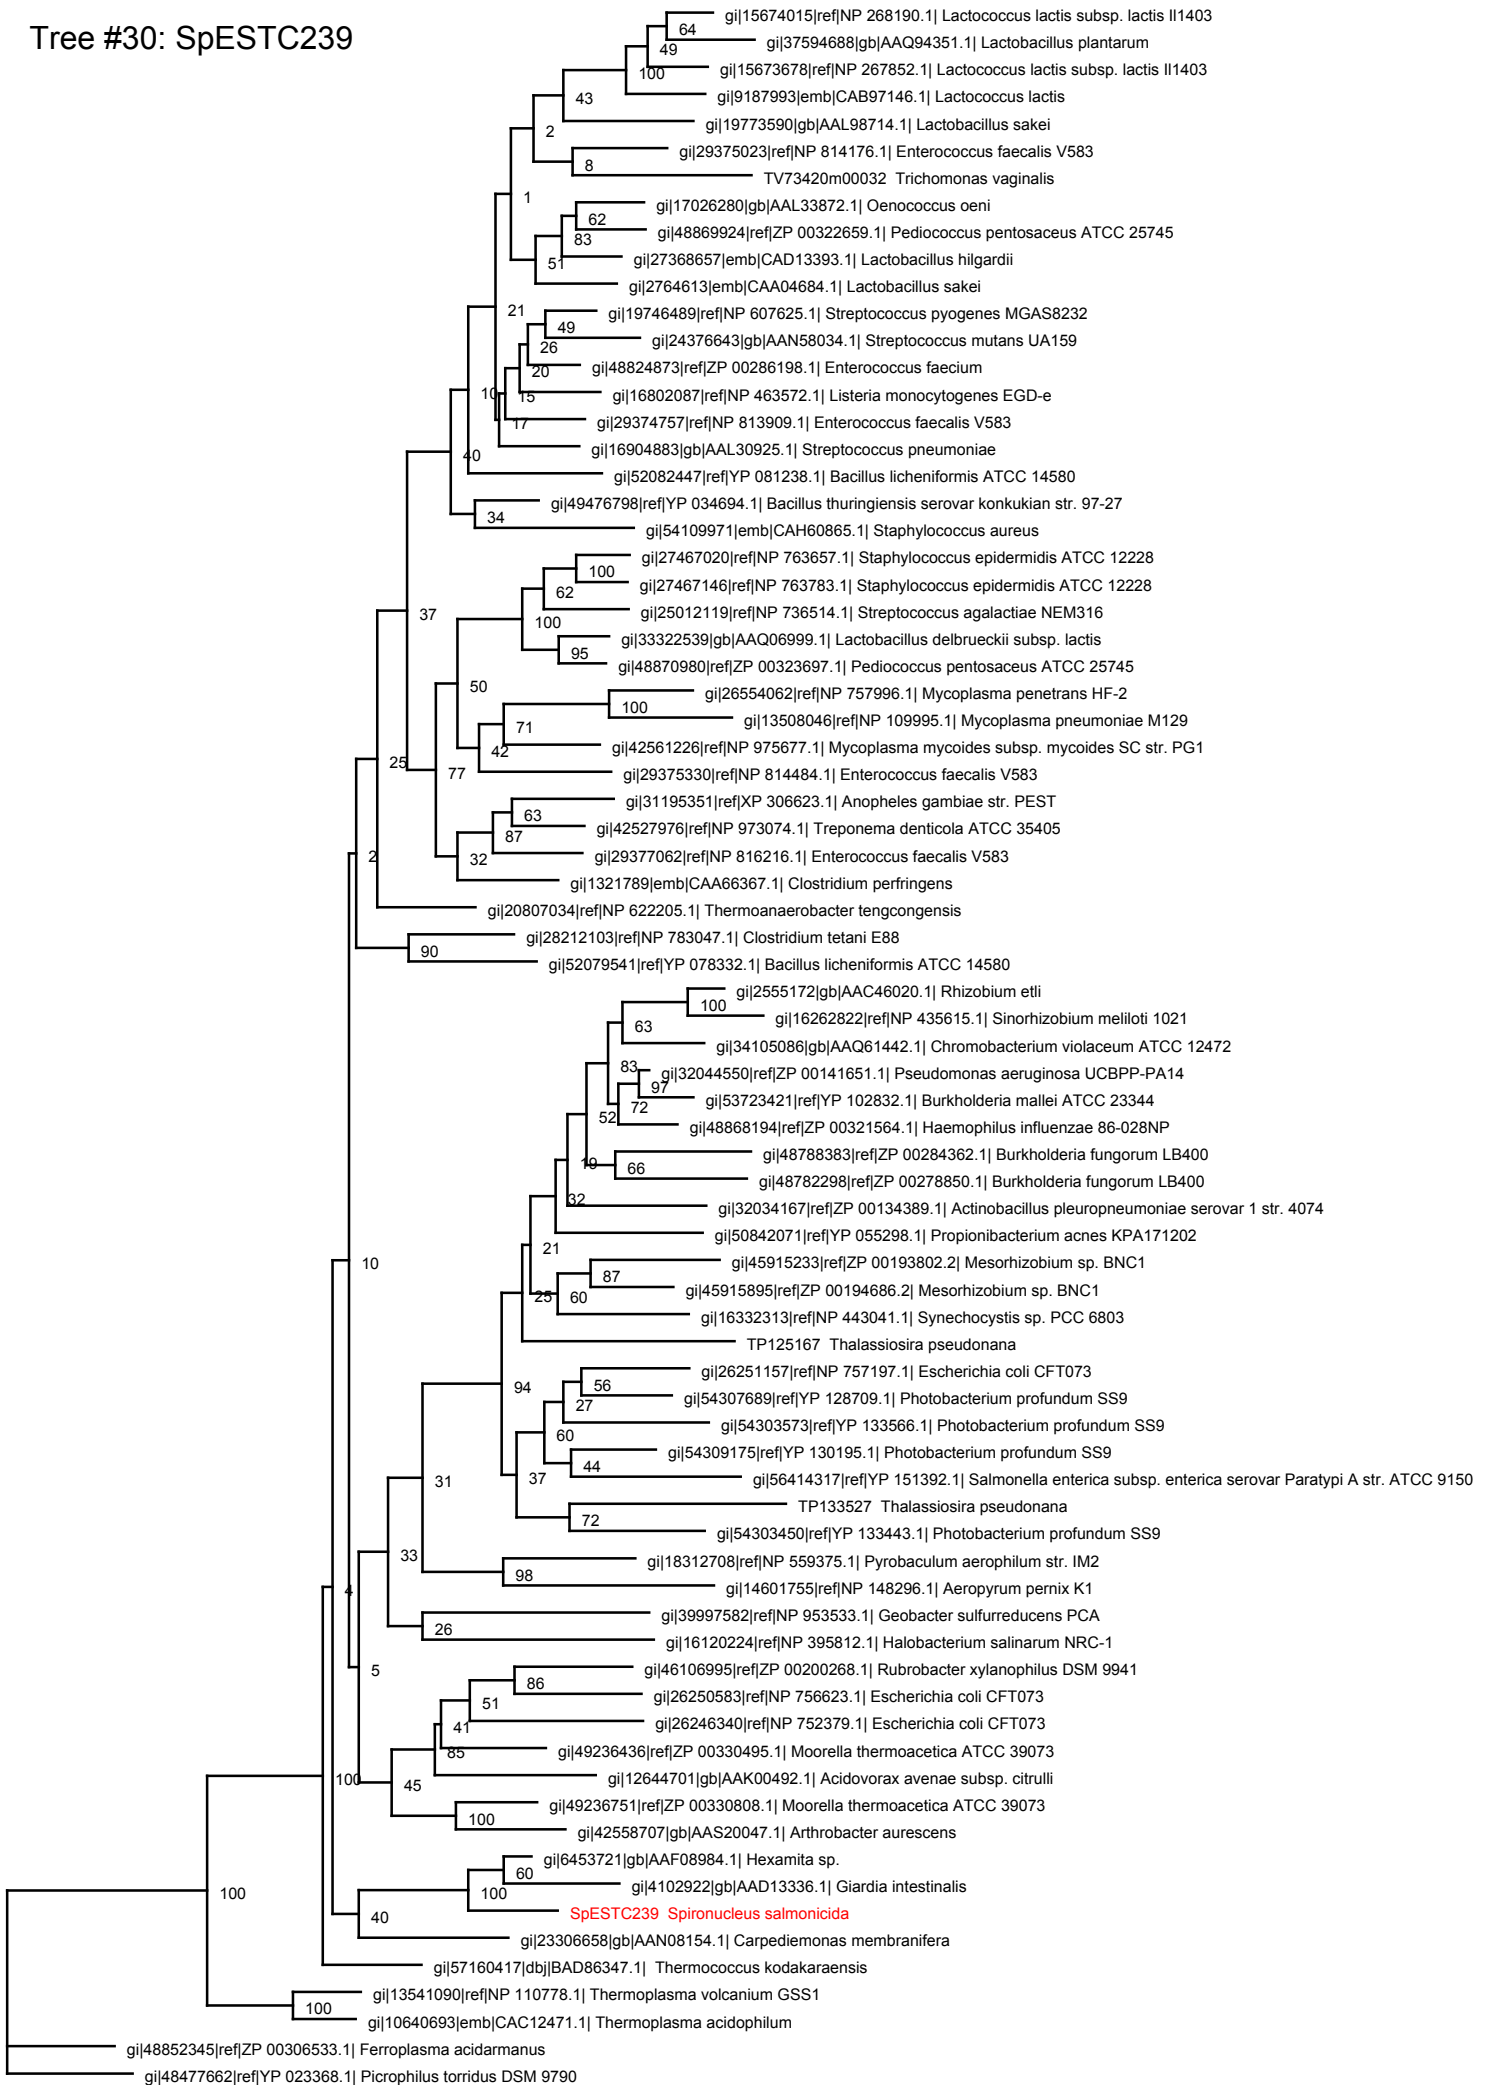



# Tree #31: gZap126bT7

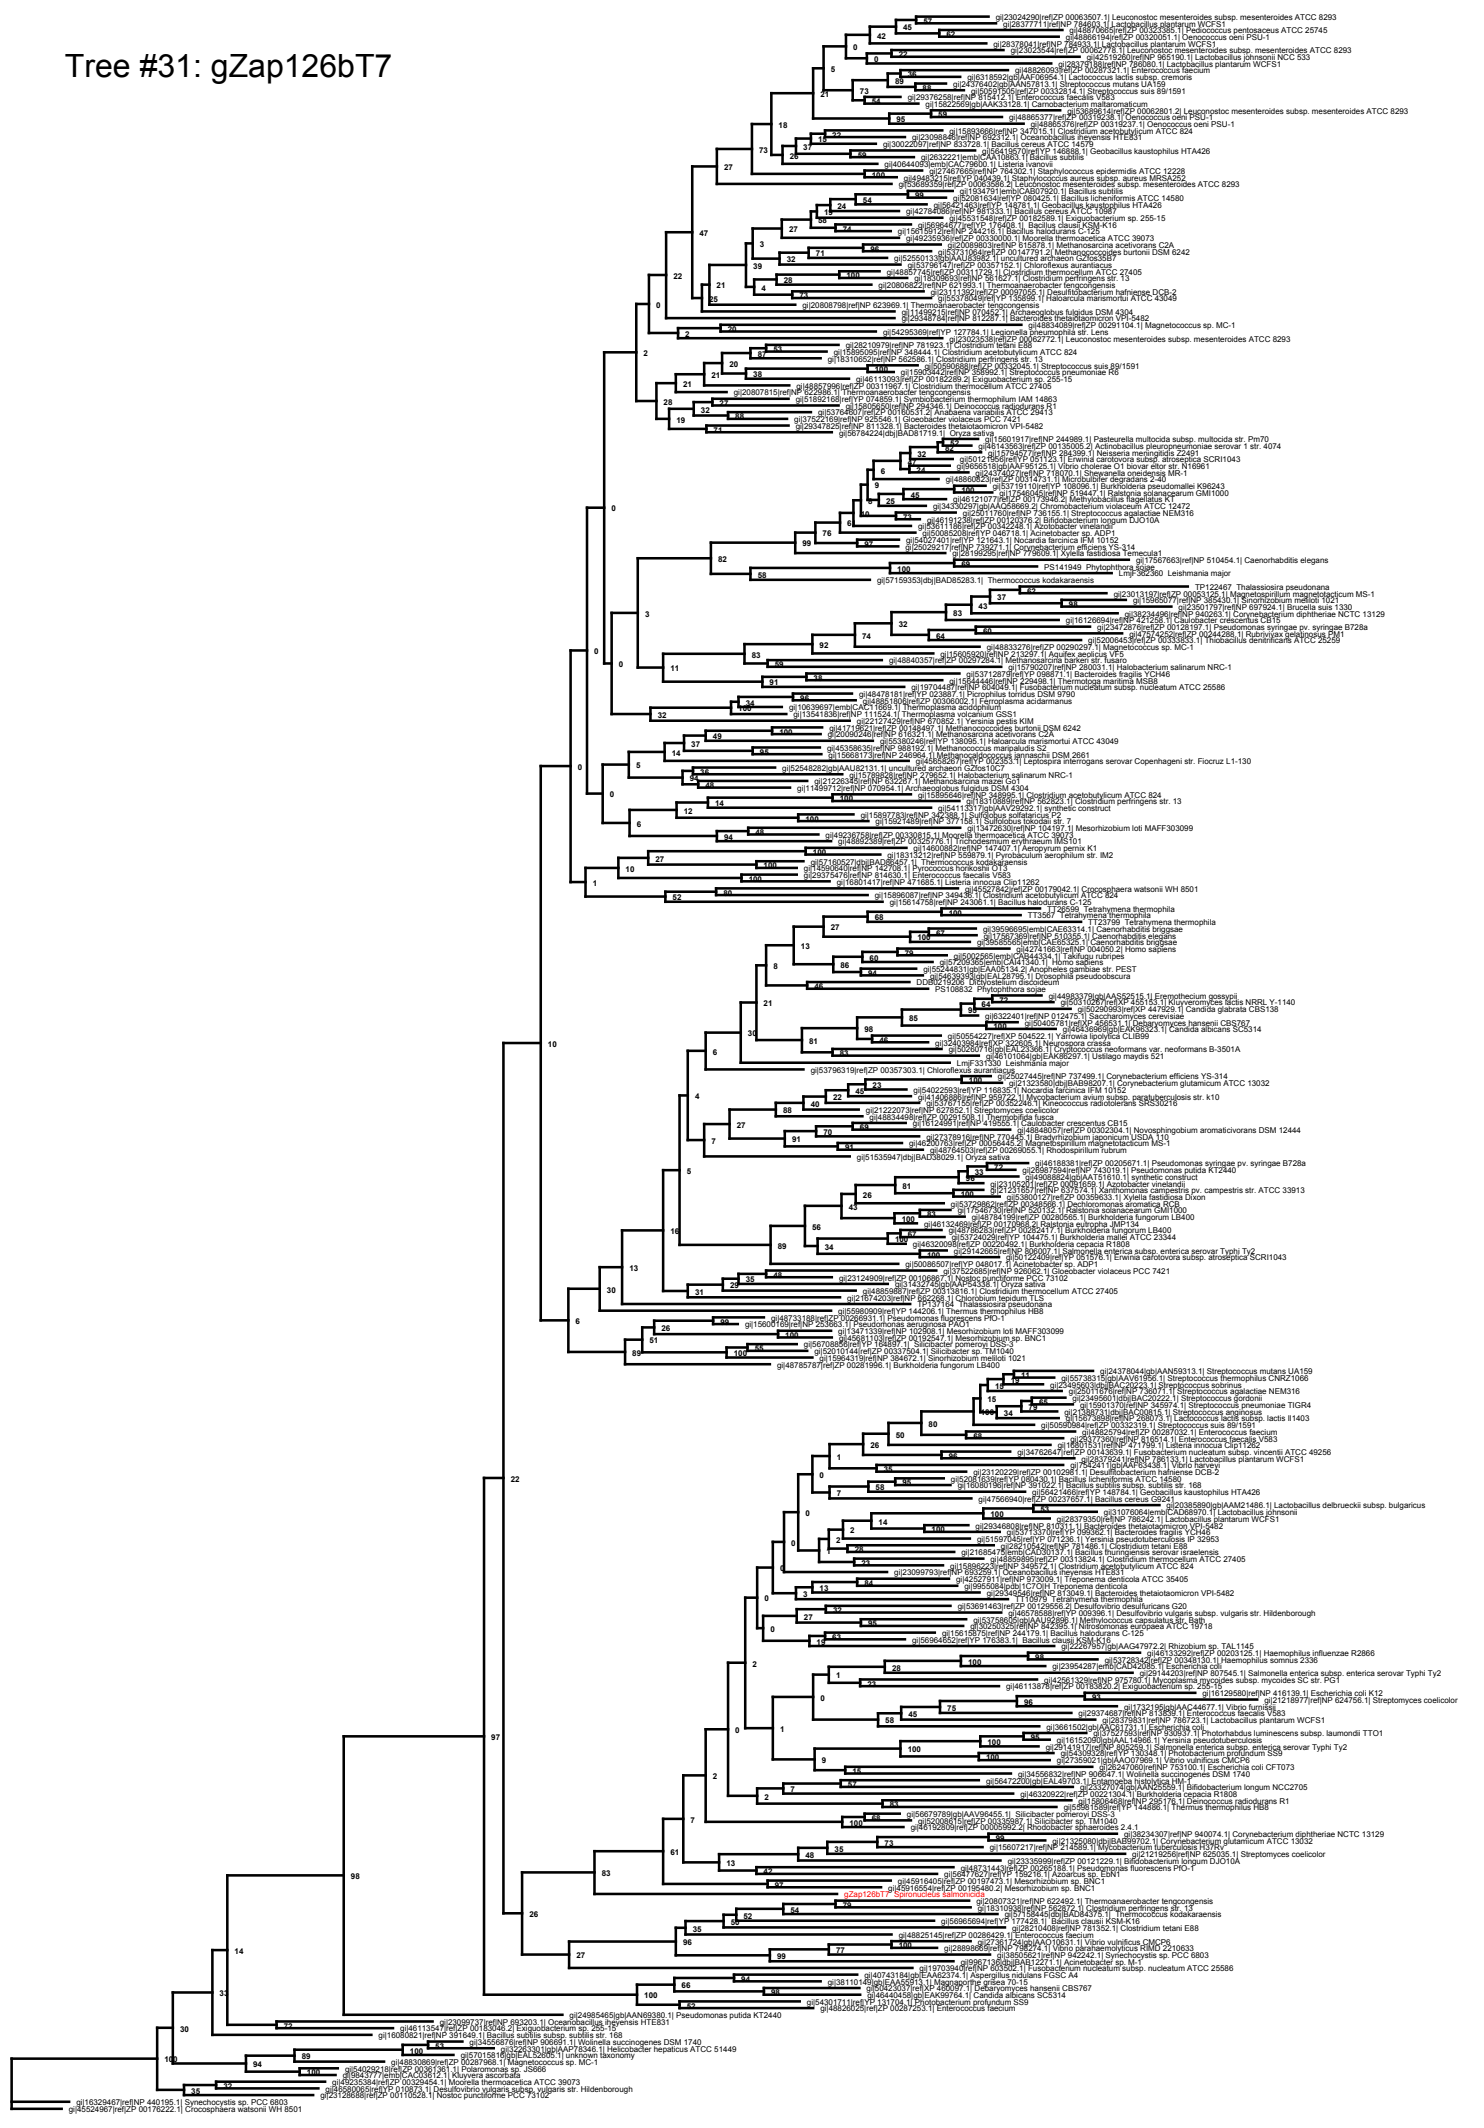

Tree #32: gZap126gT3

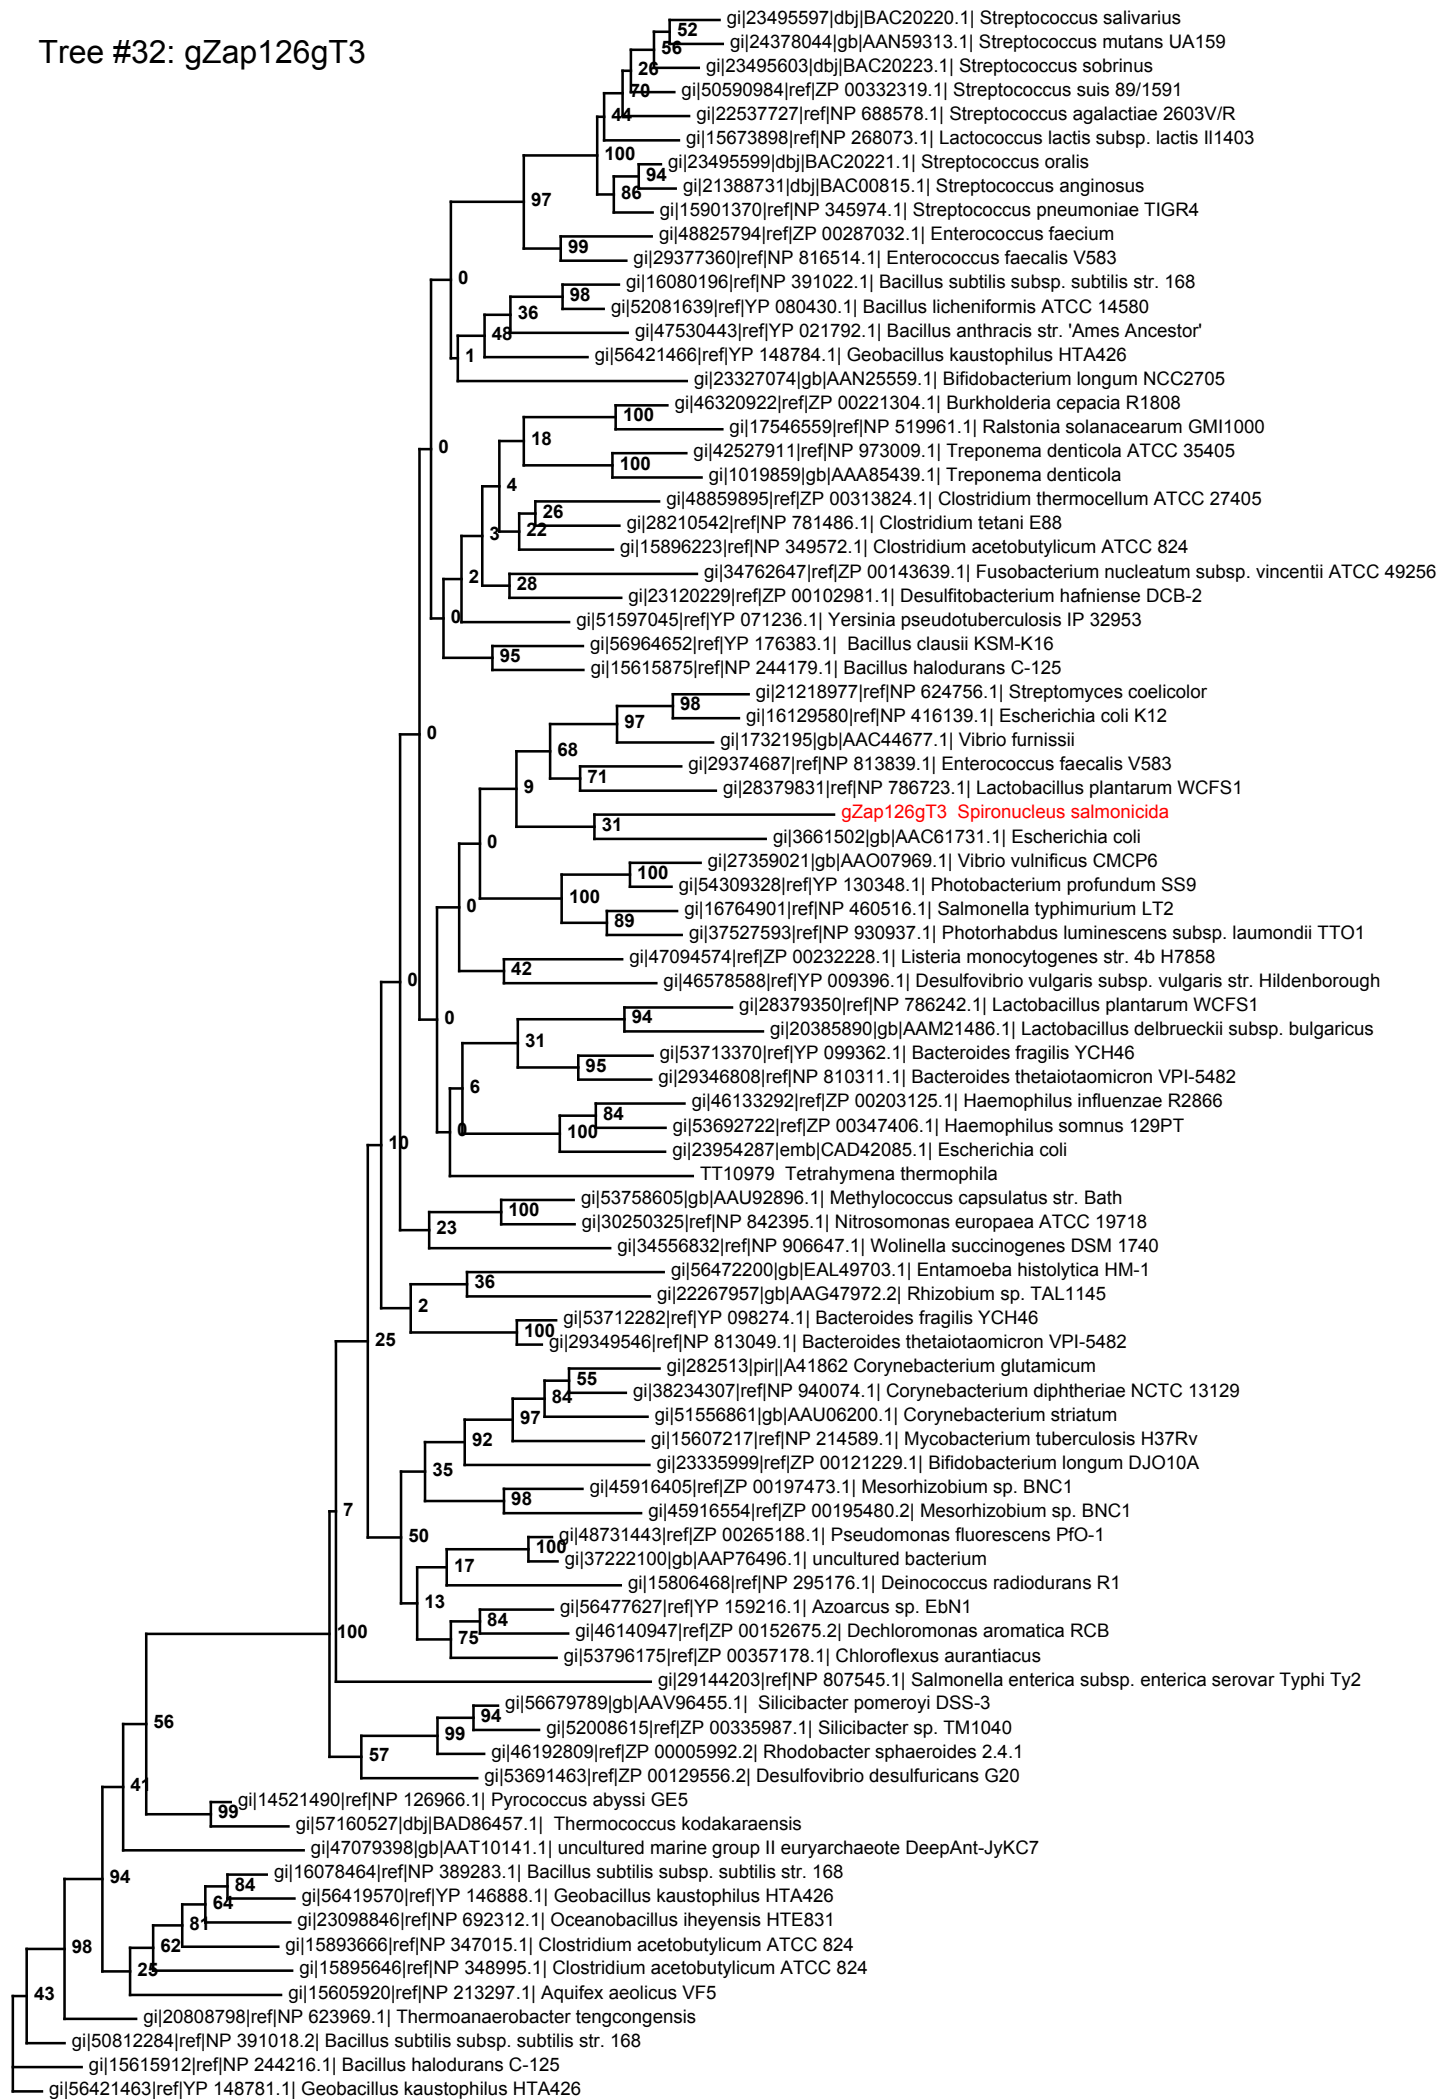

Tree #33: SpESTC259, SpEST1299, SpEST1913

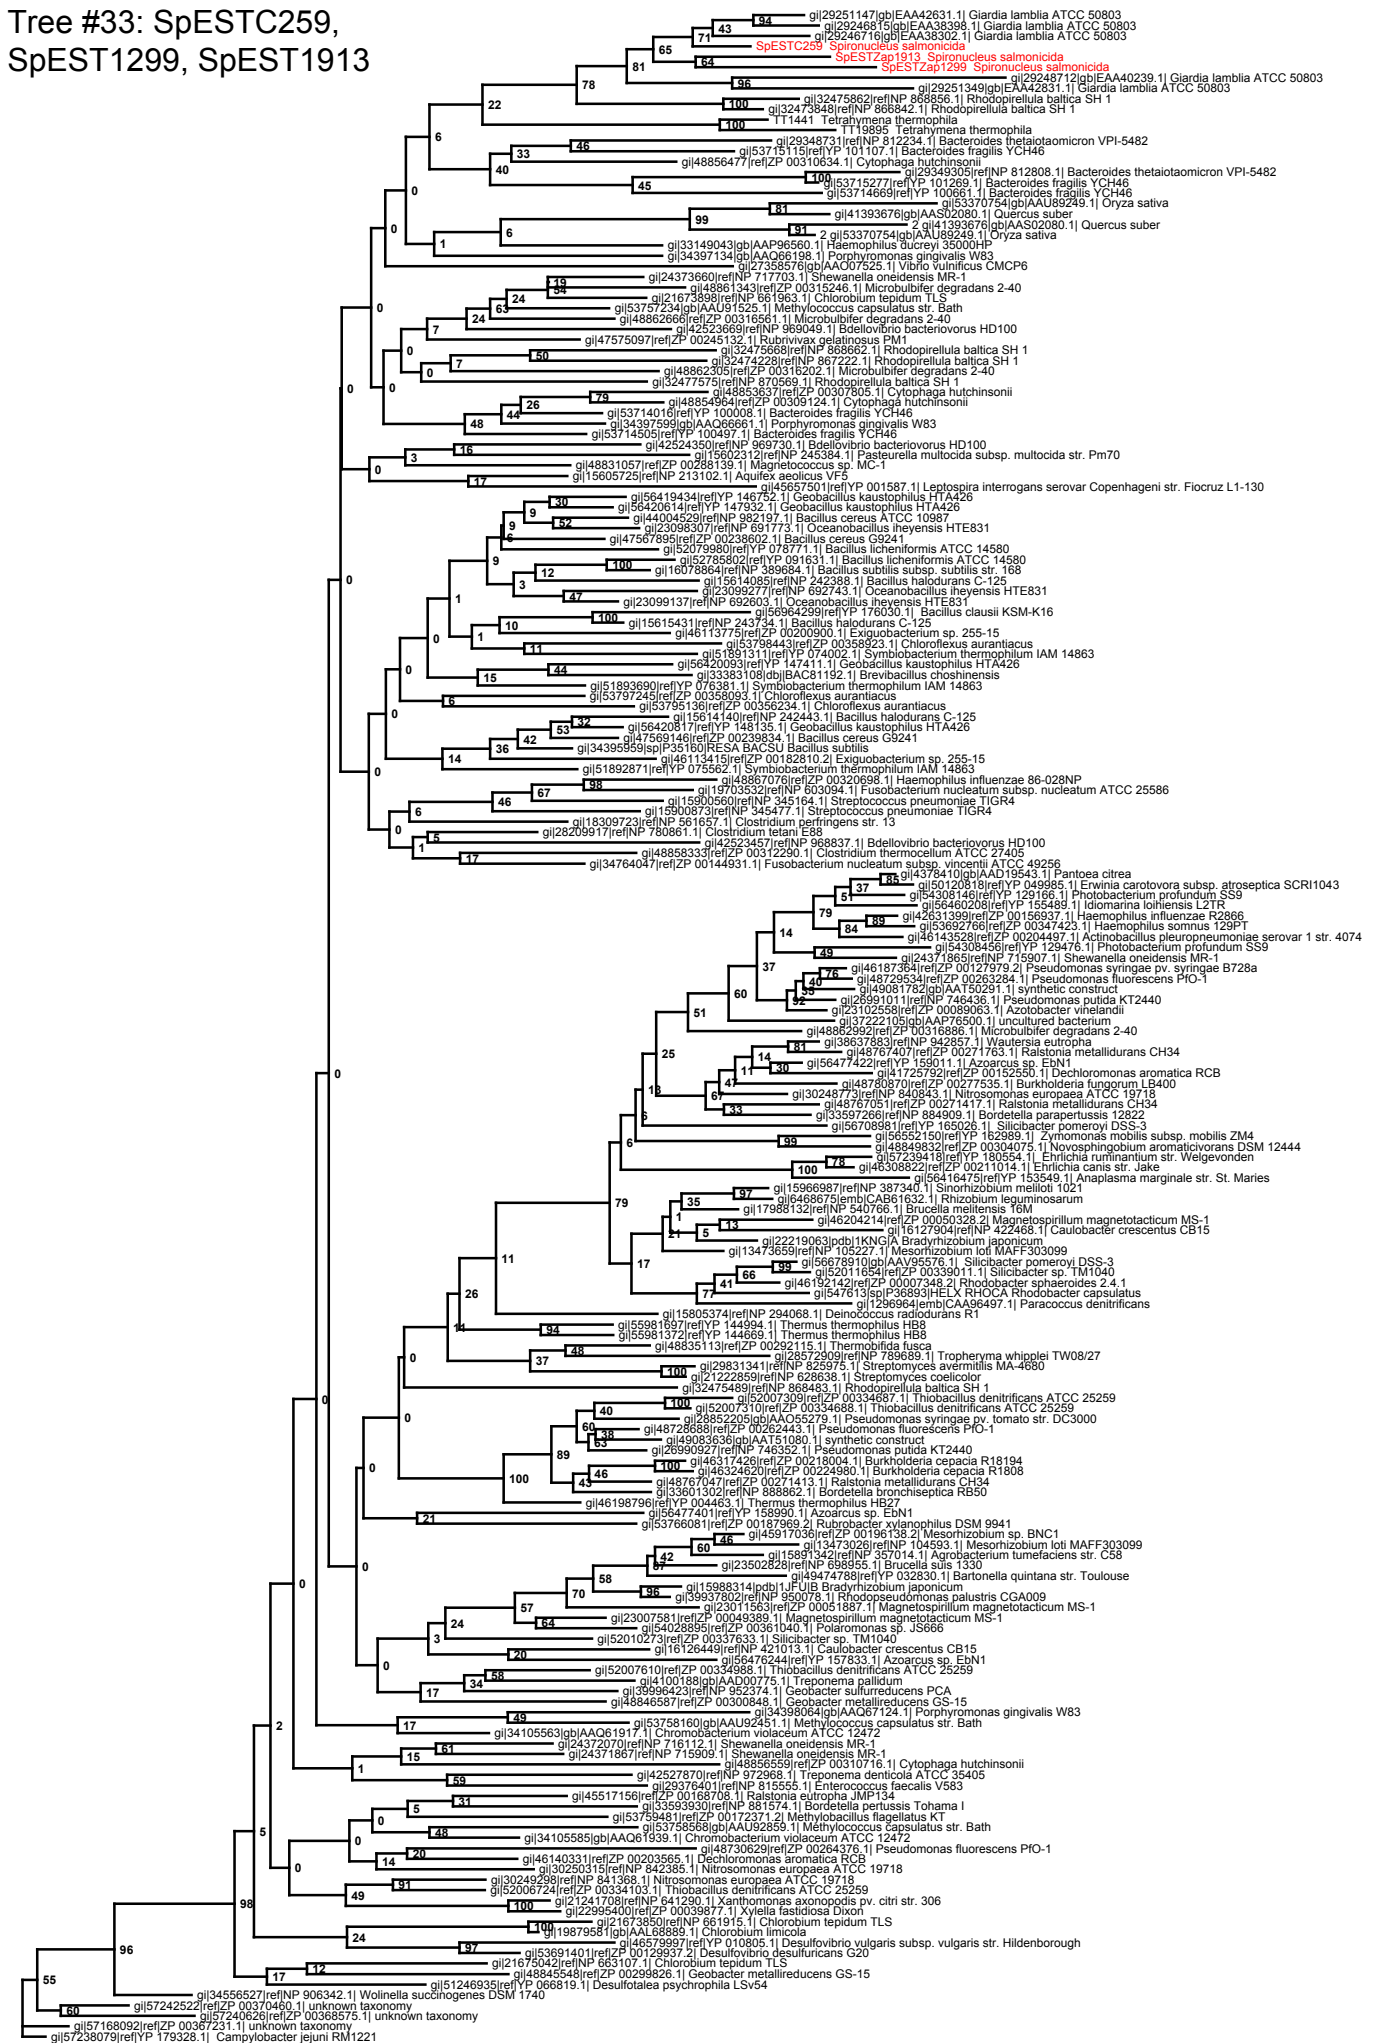



Tree #34: 20530910

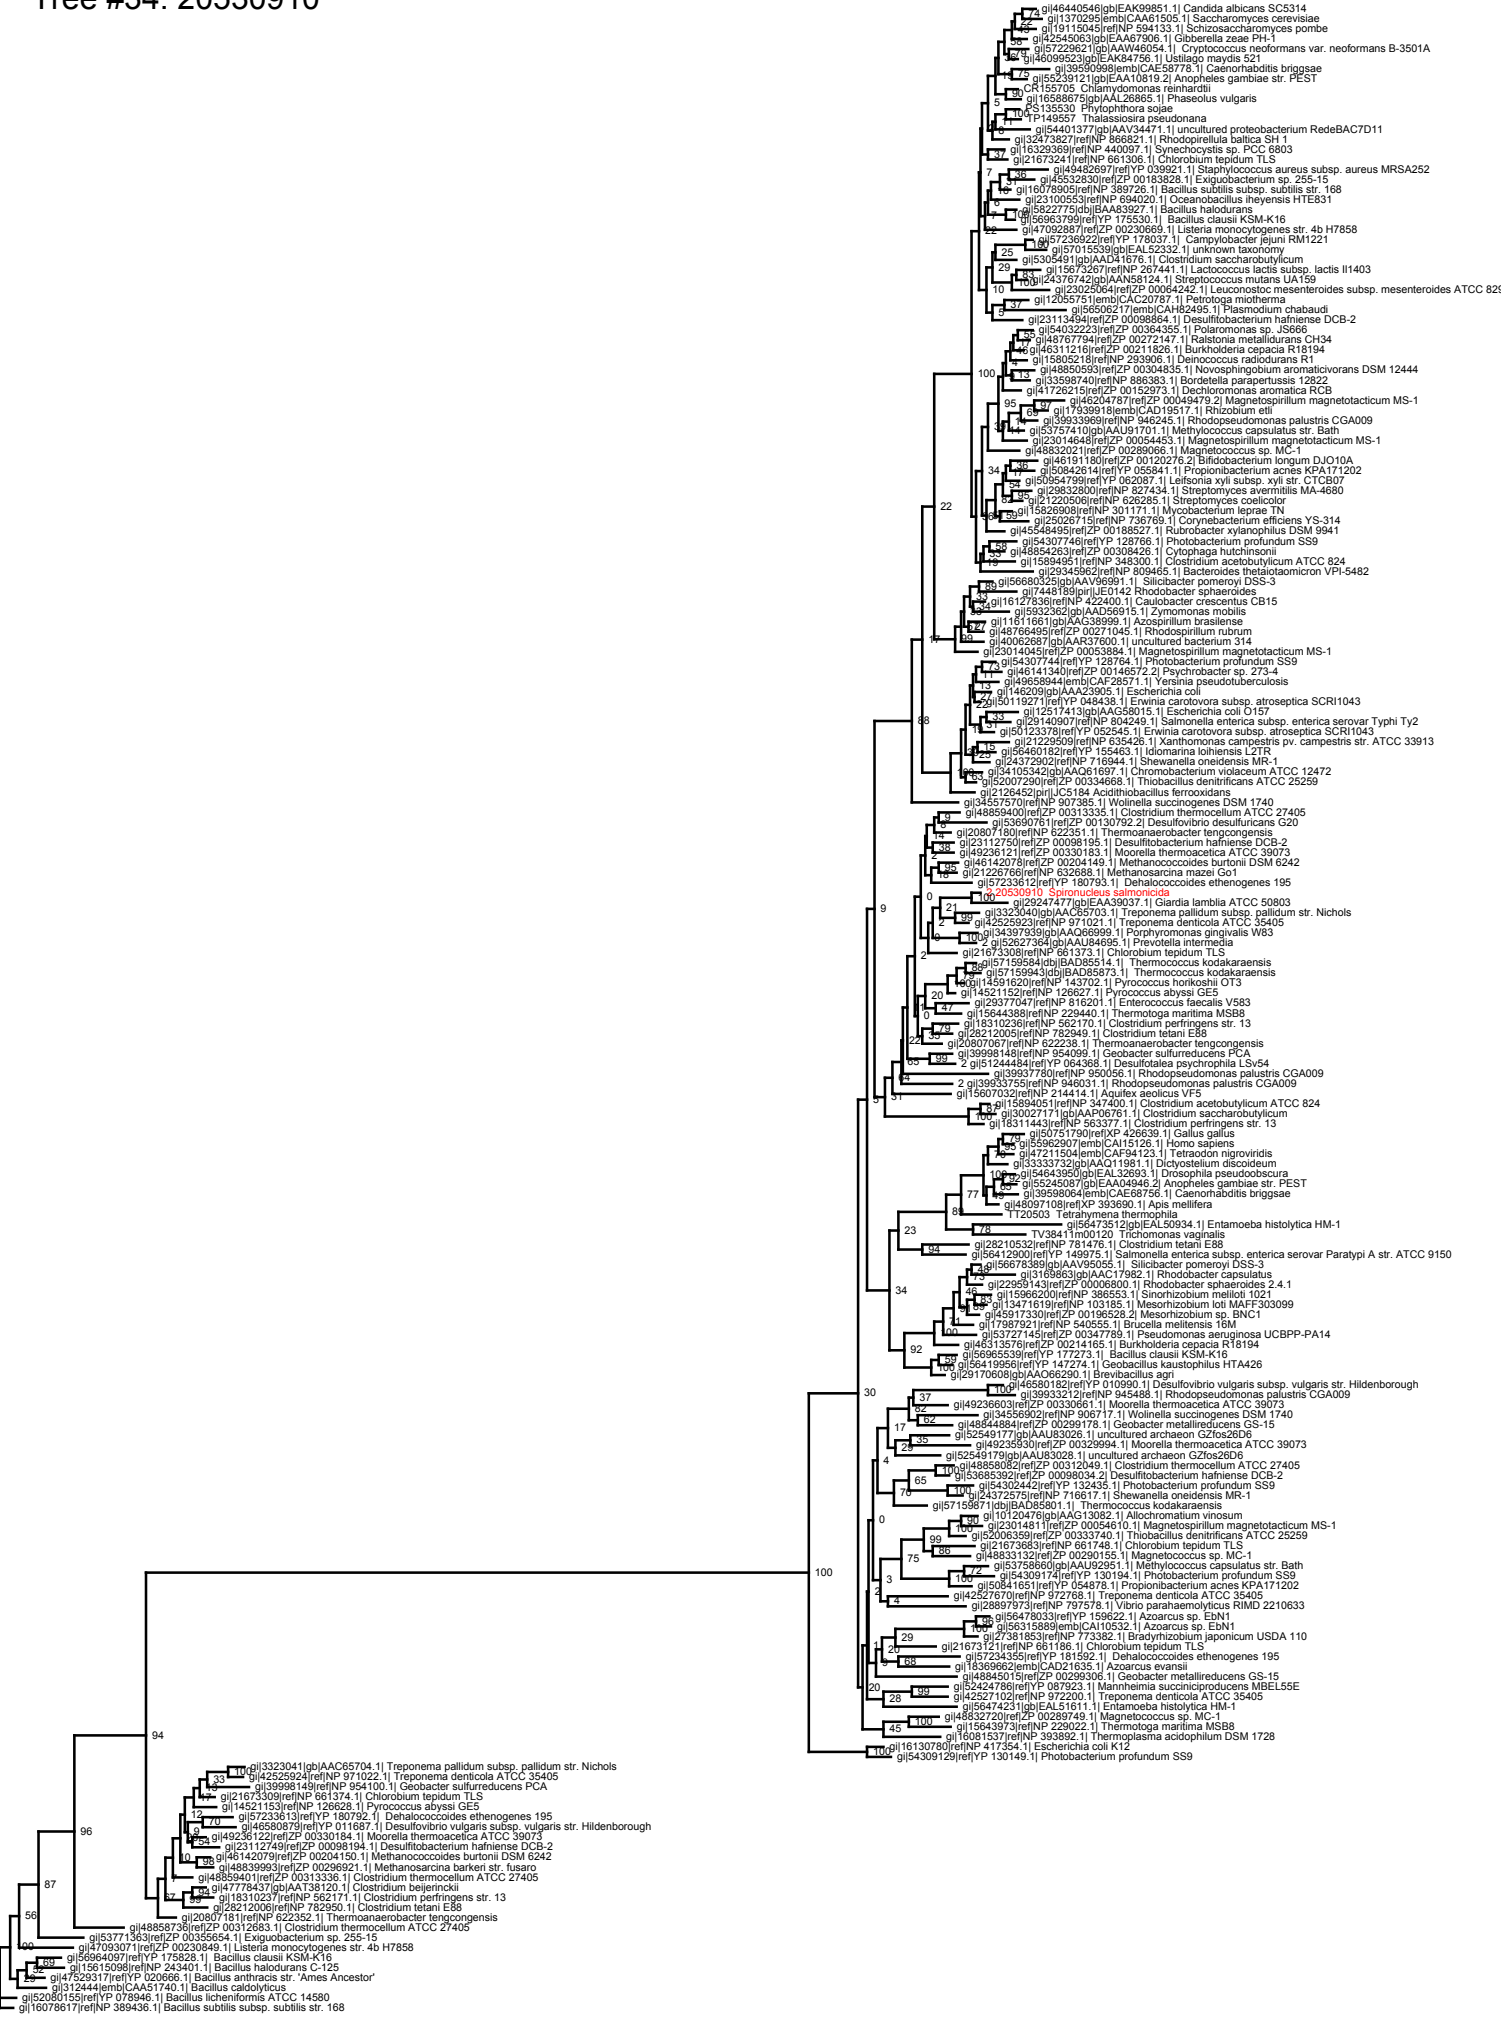

Tree #35: 27983817

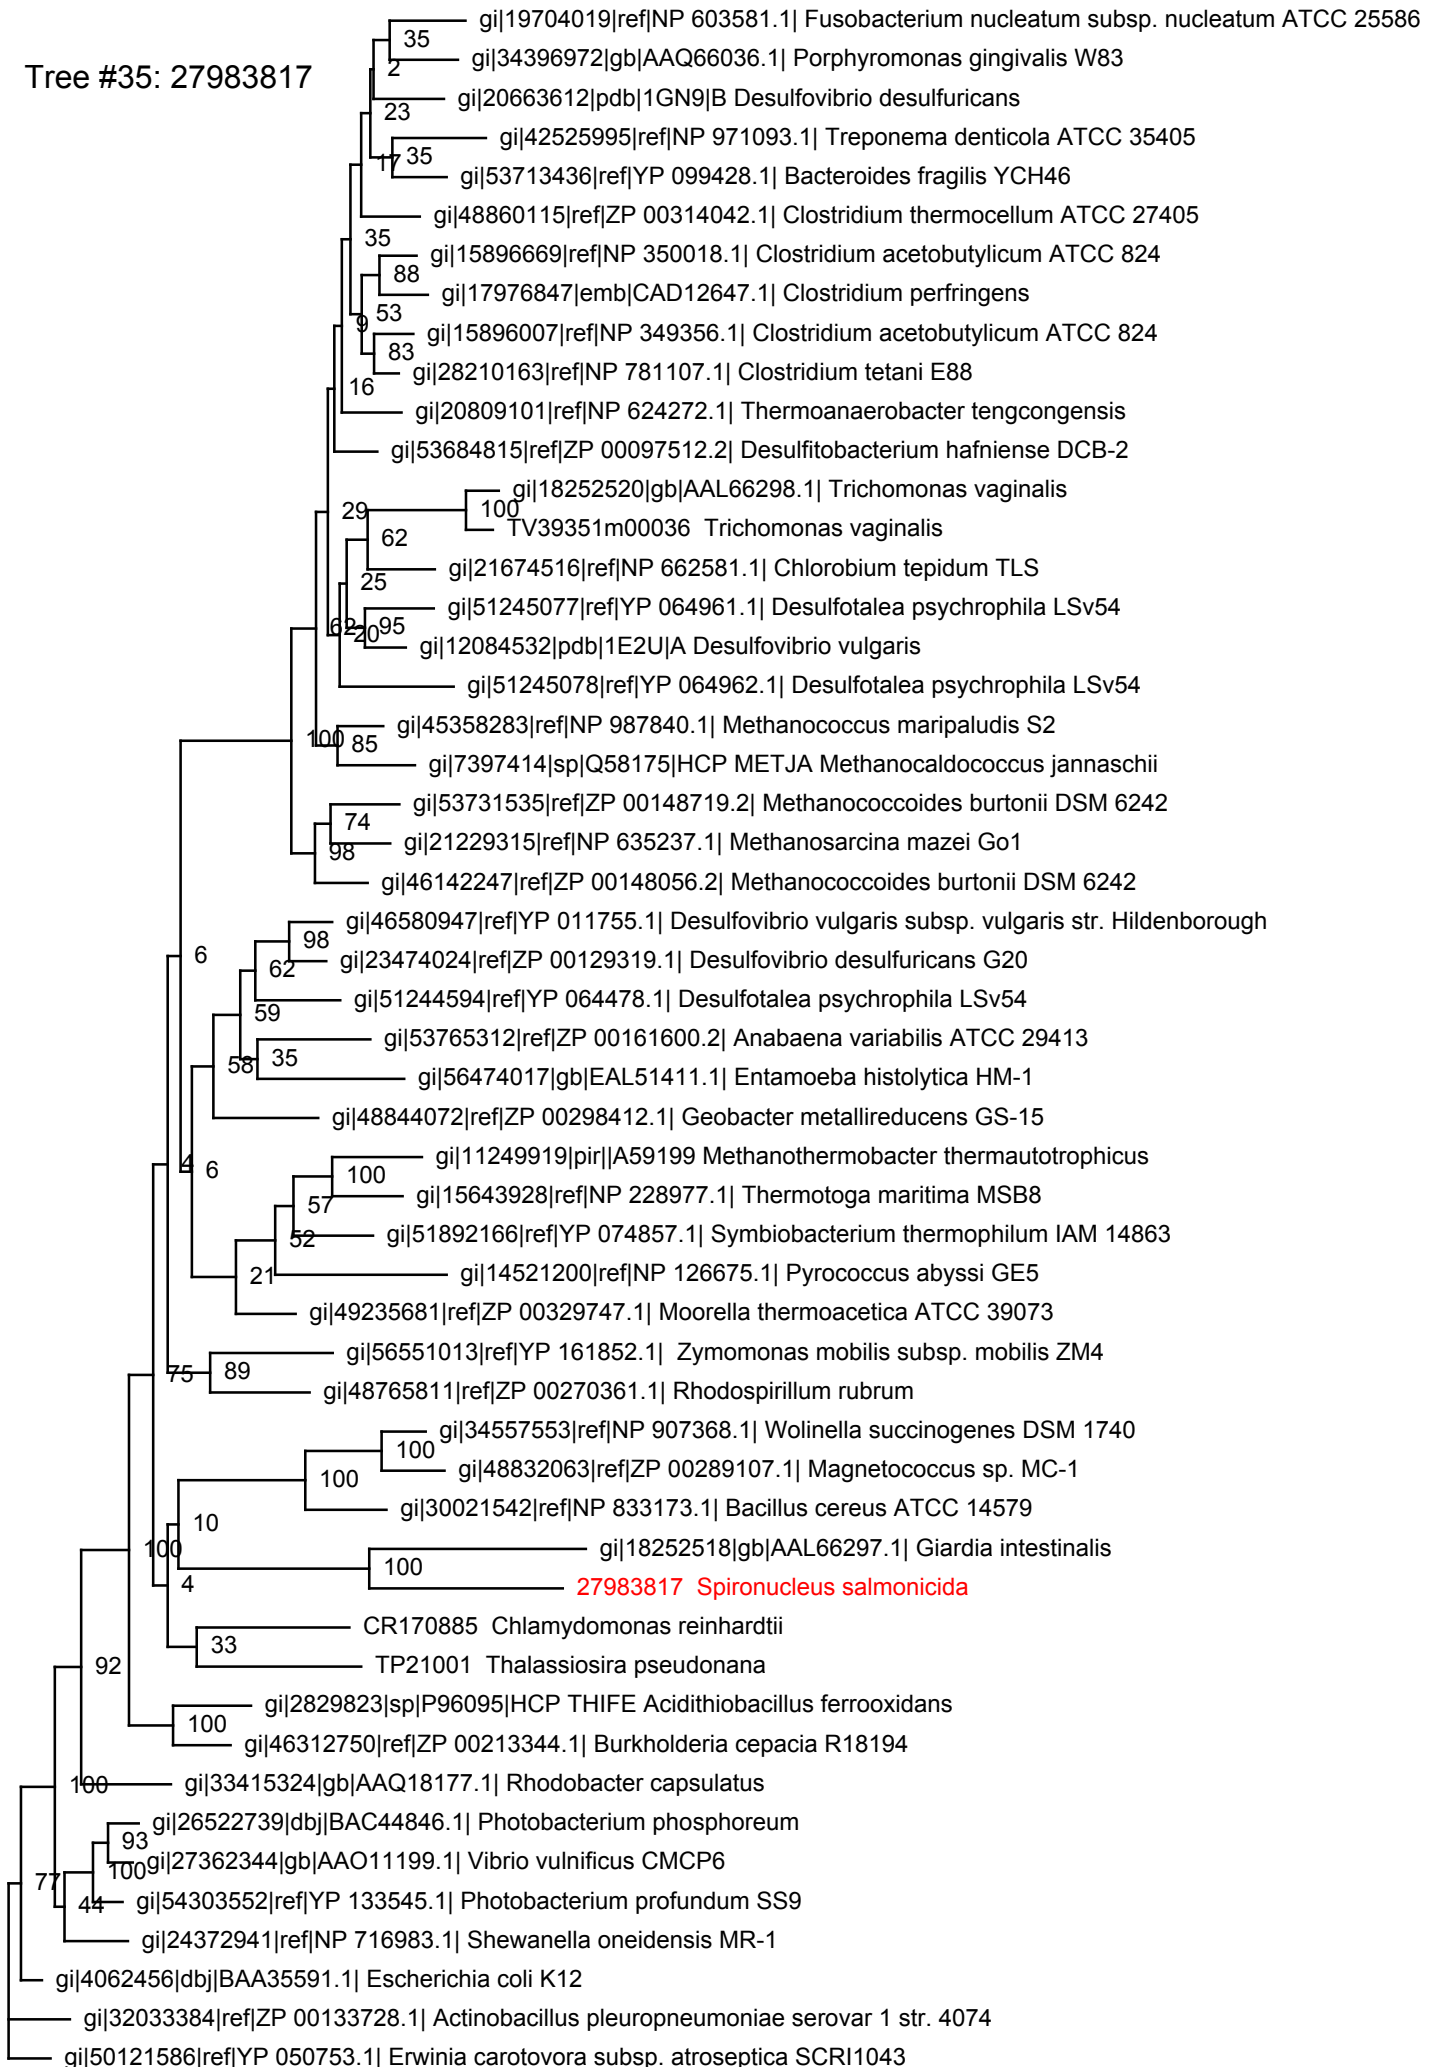

Tree #36: gTol313bMF

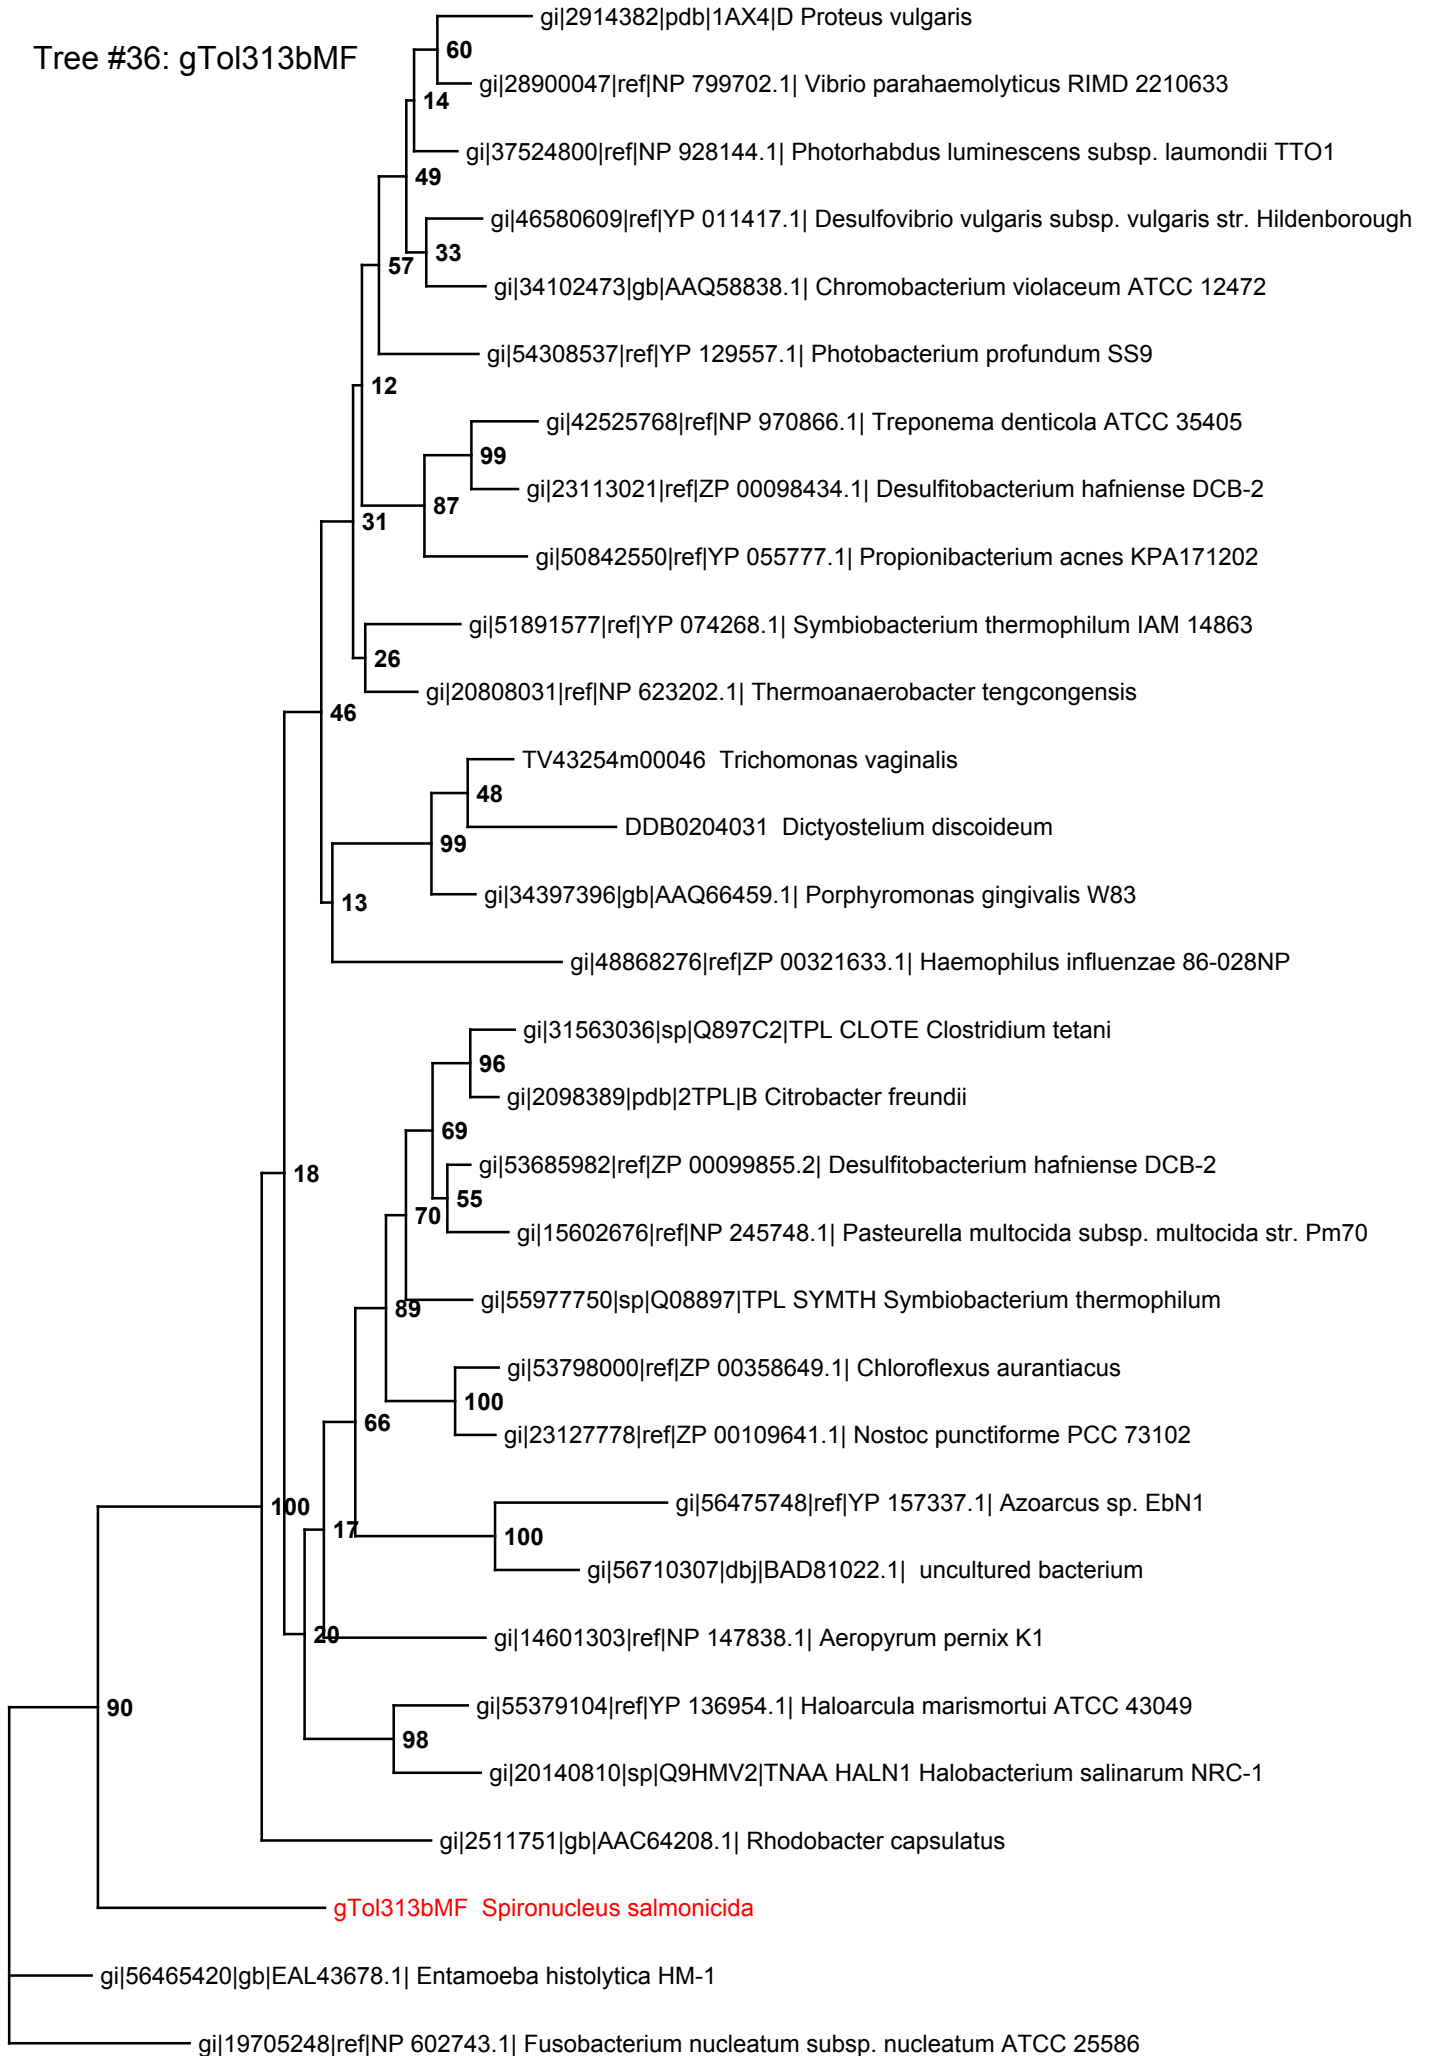

Tree #37: SpESTC204

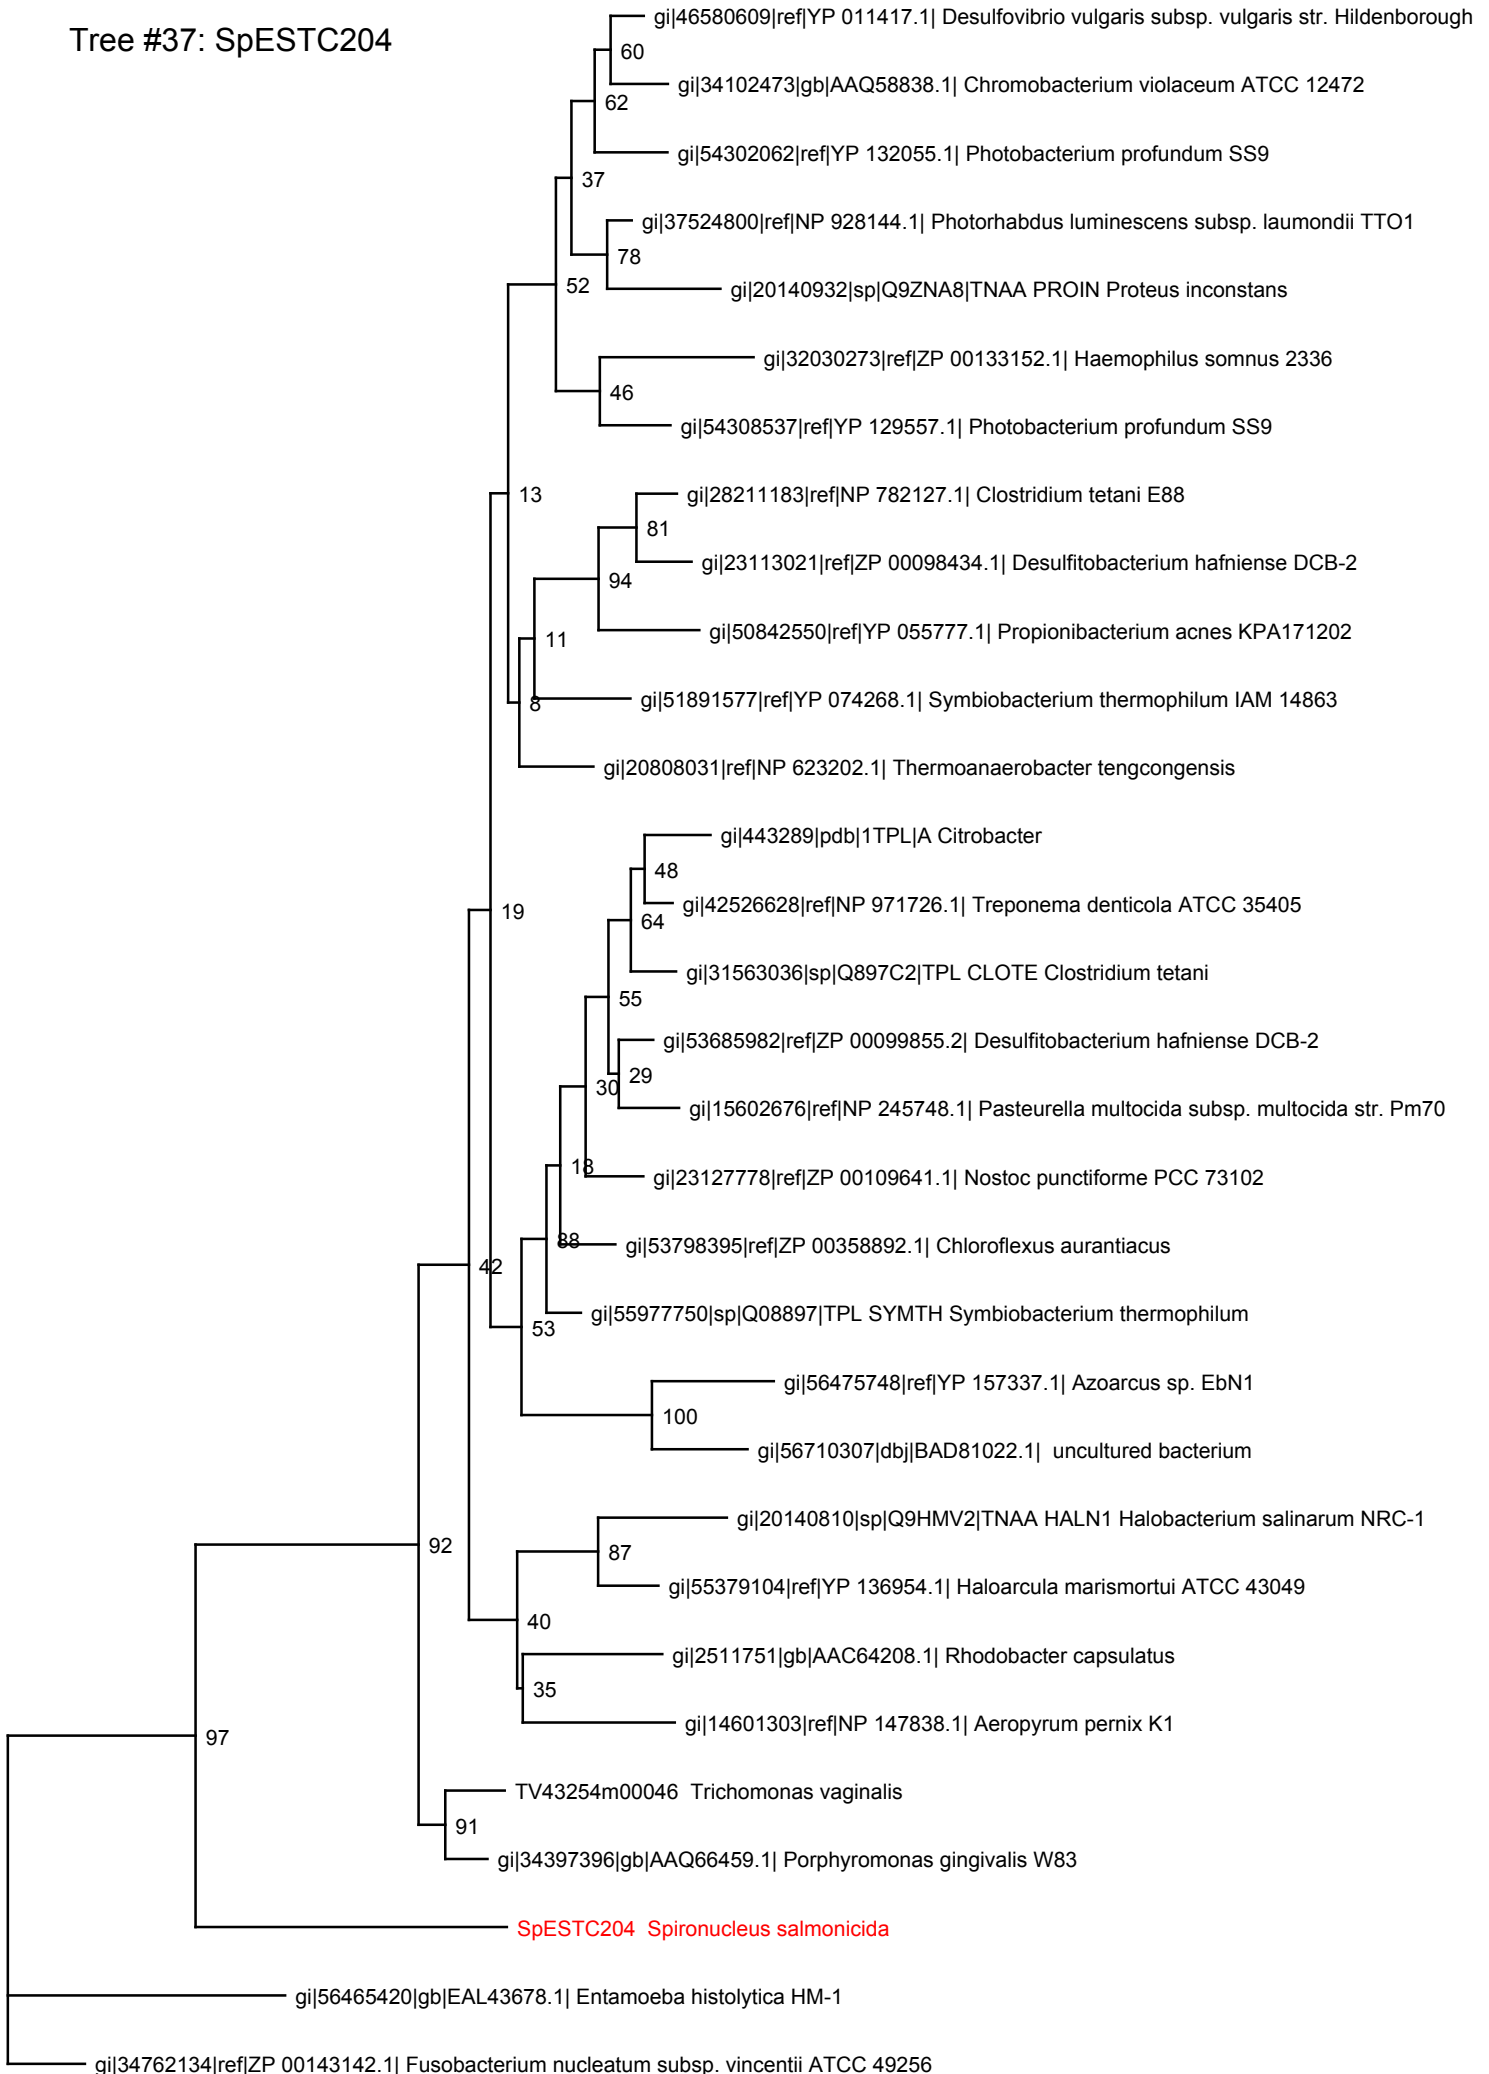



Tree #38: gZal229bMF

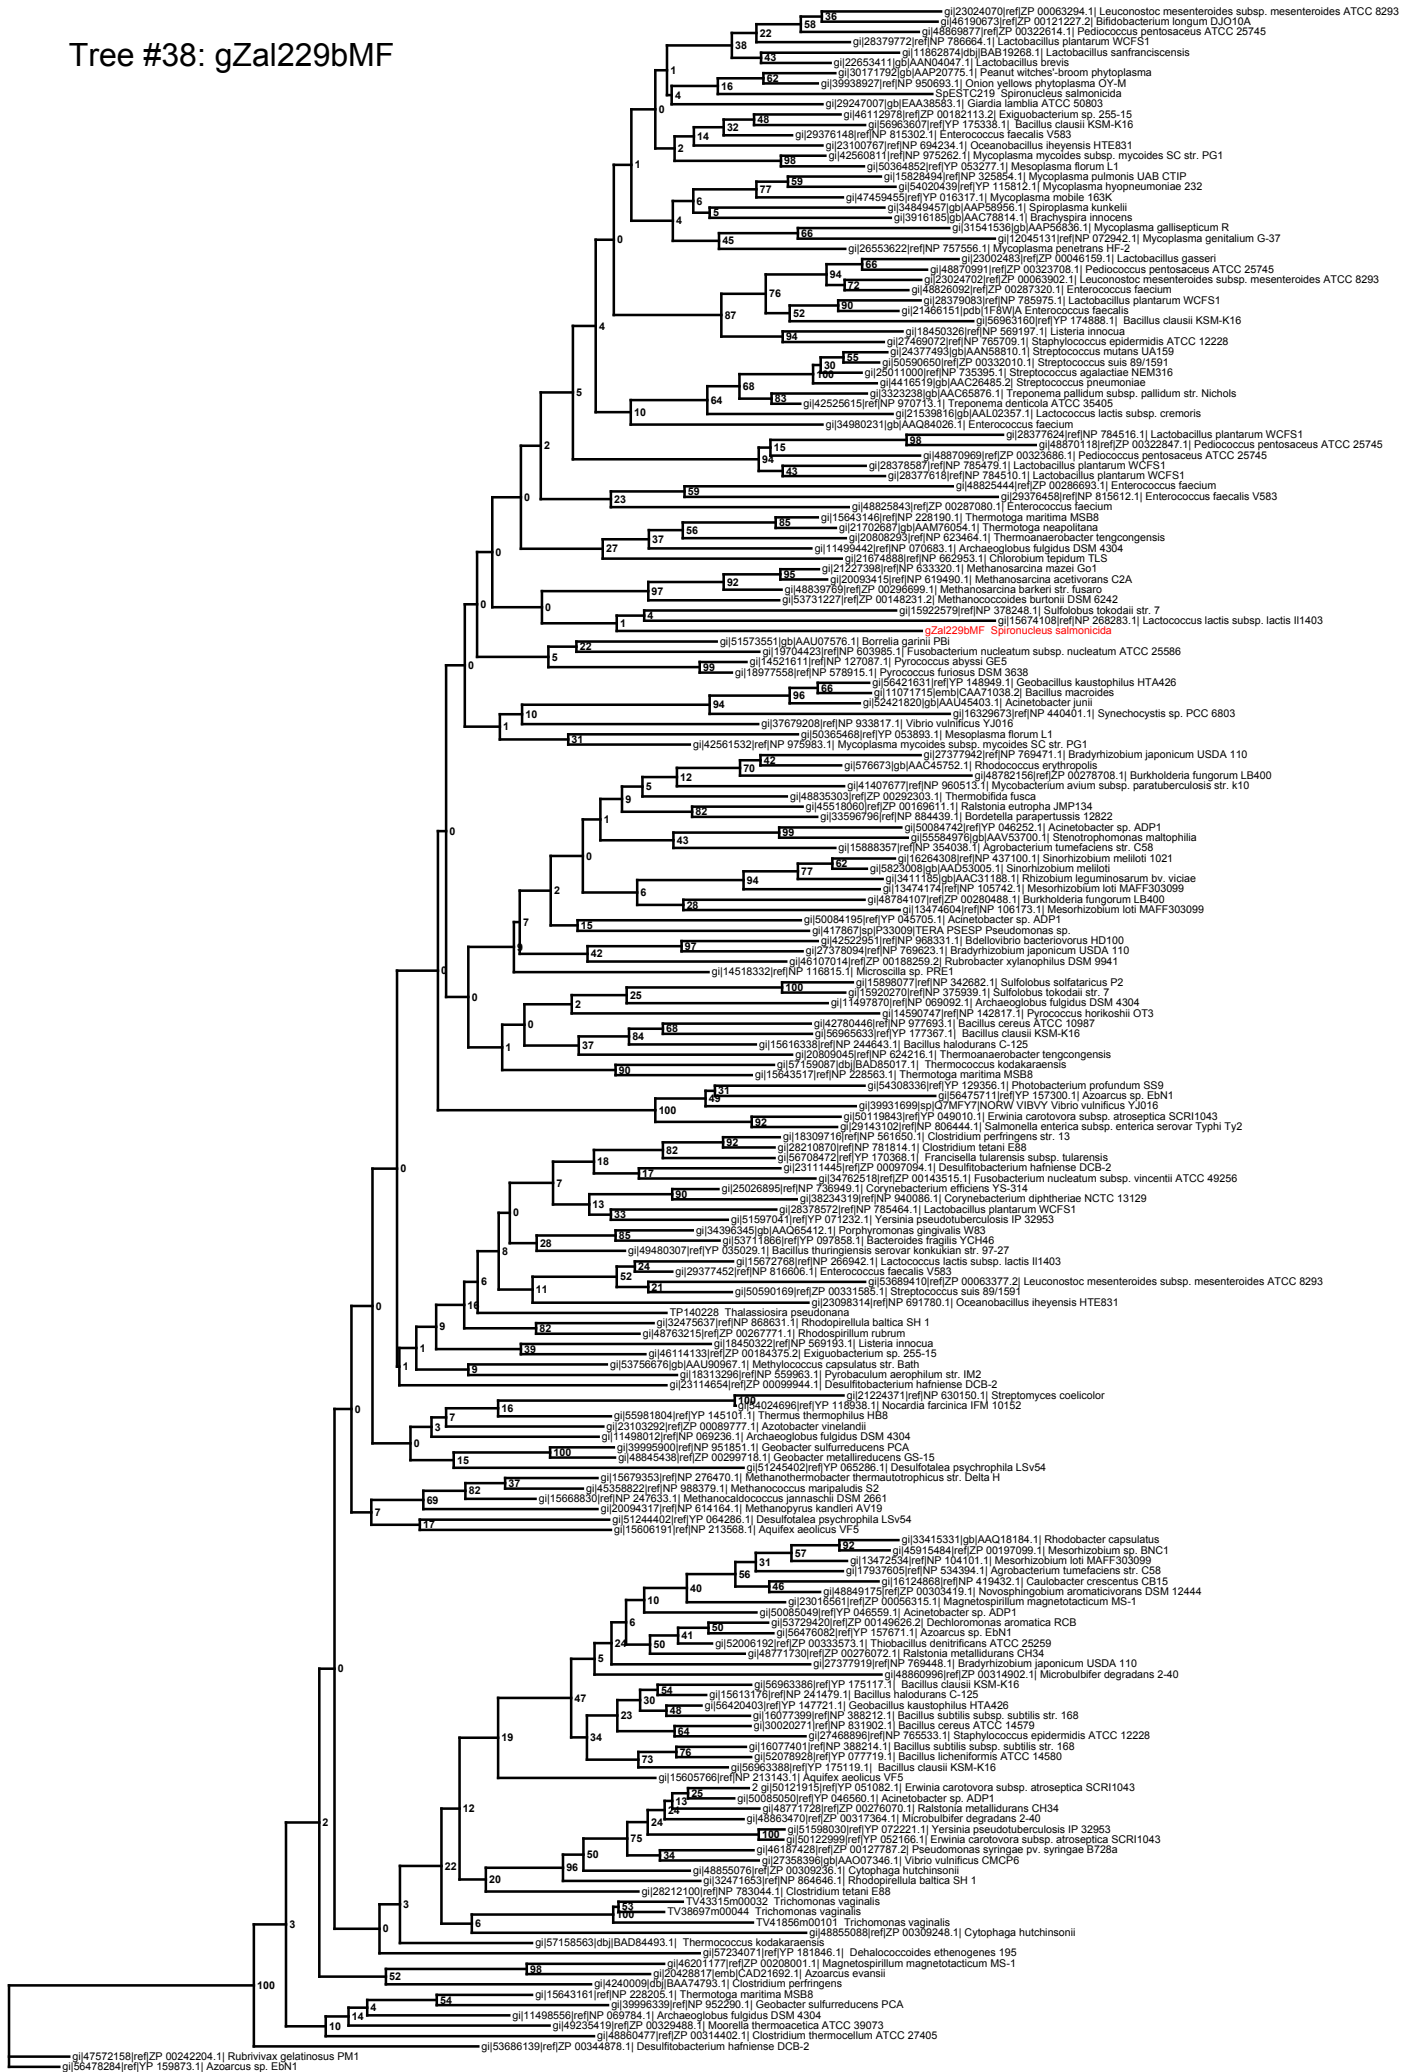

Tree #39: SpESTC219

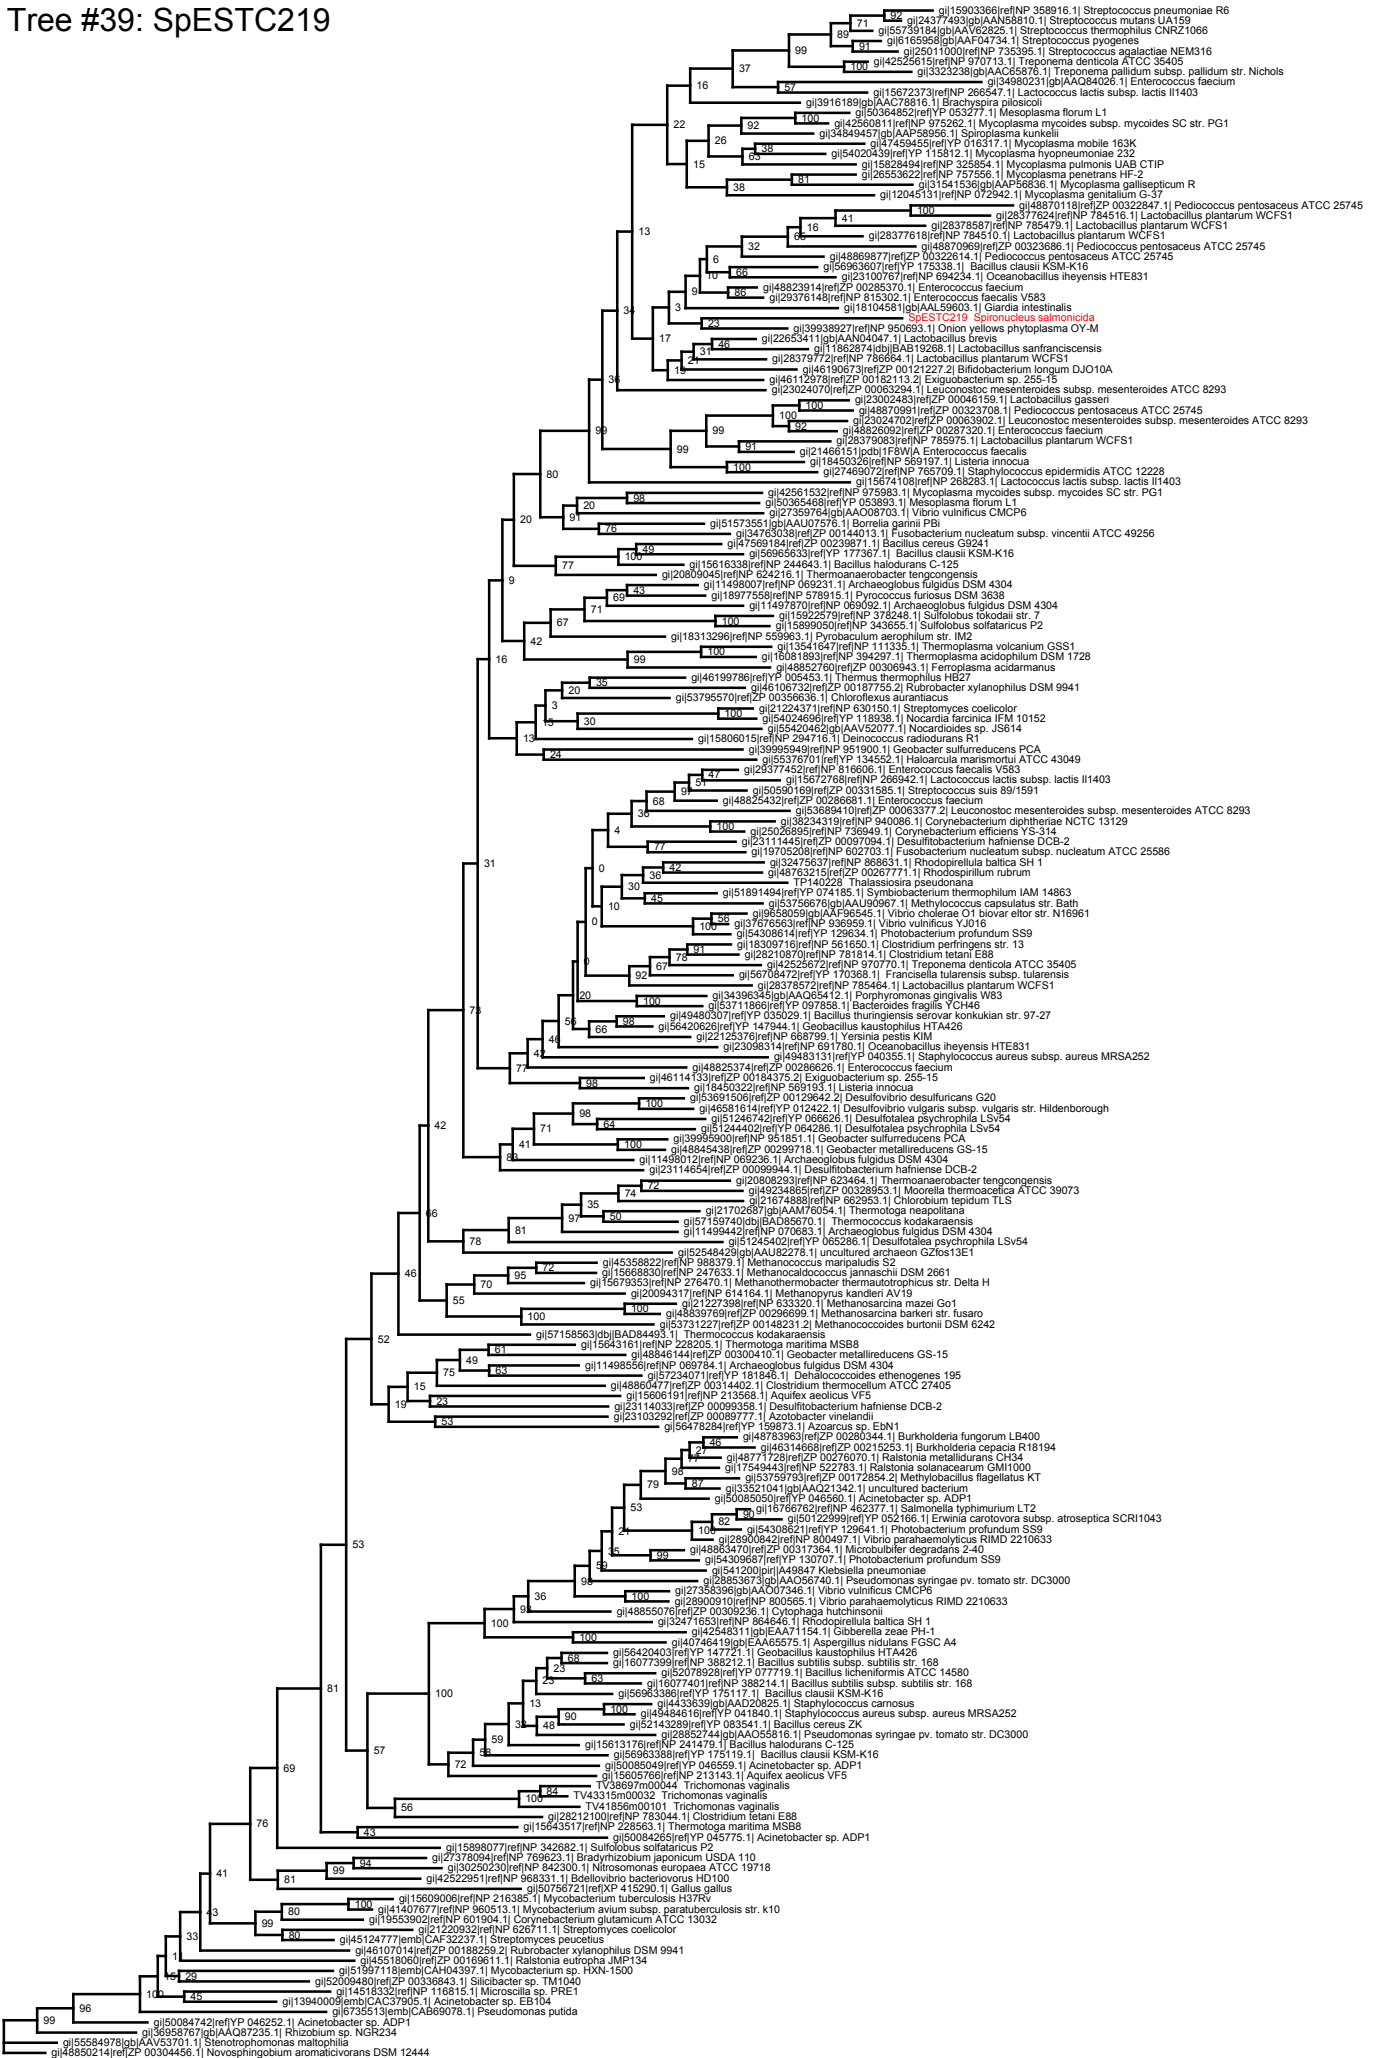

Tree #40: SpESTDH113

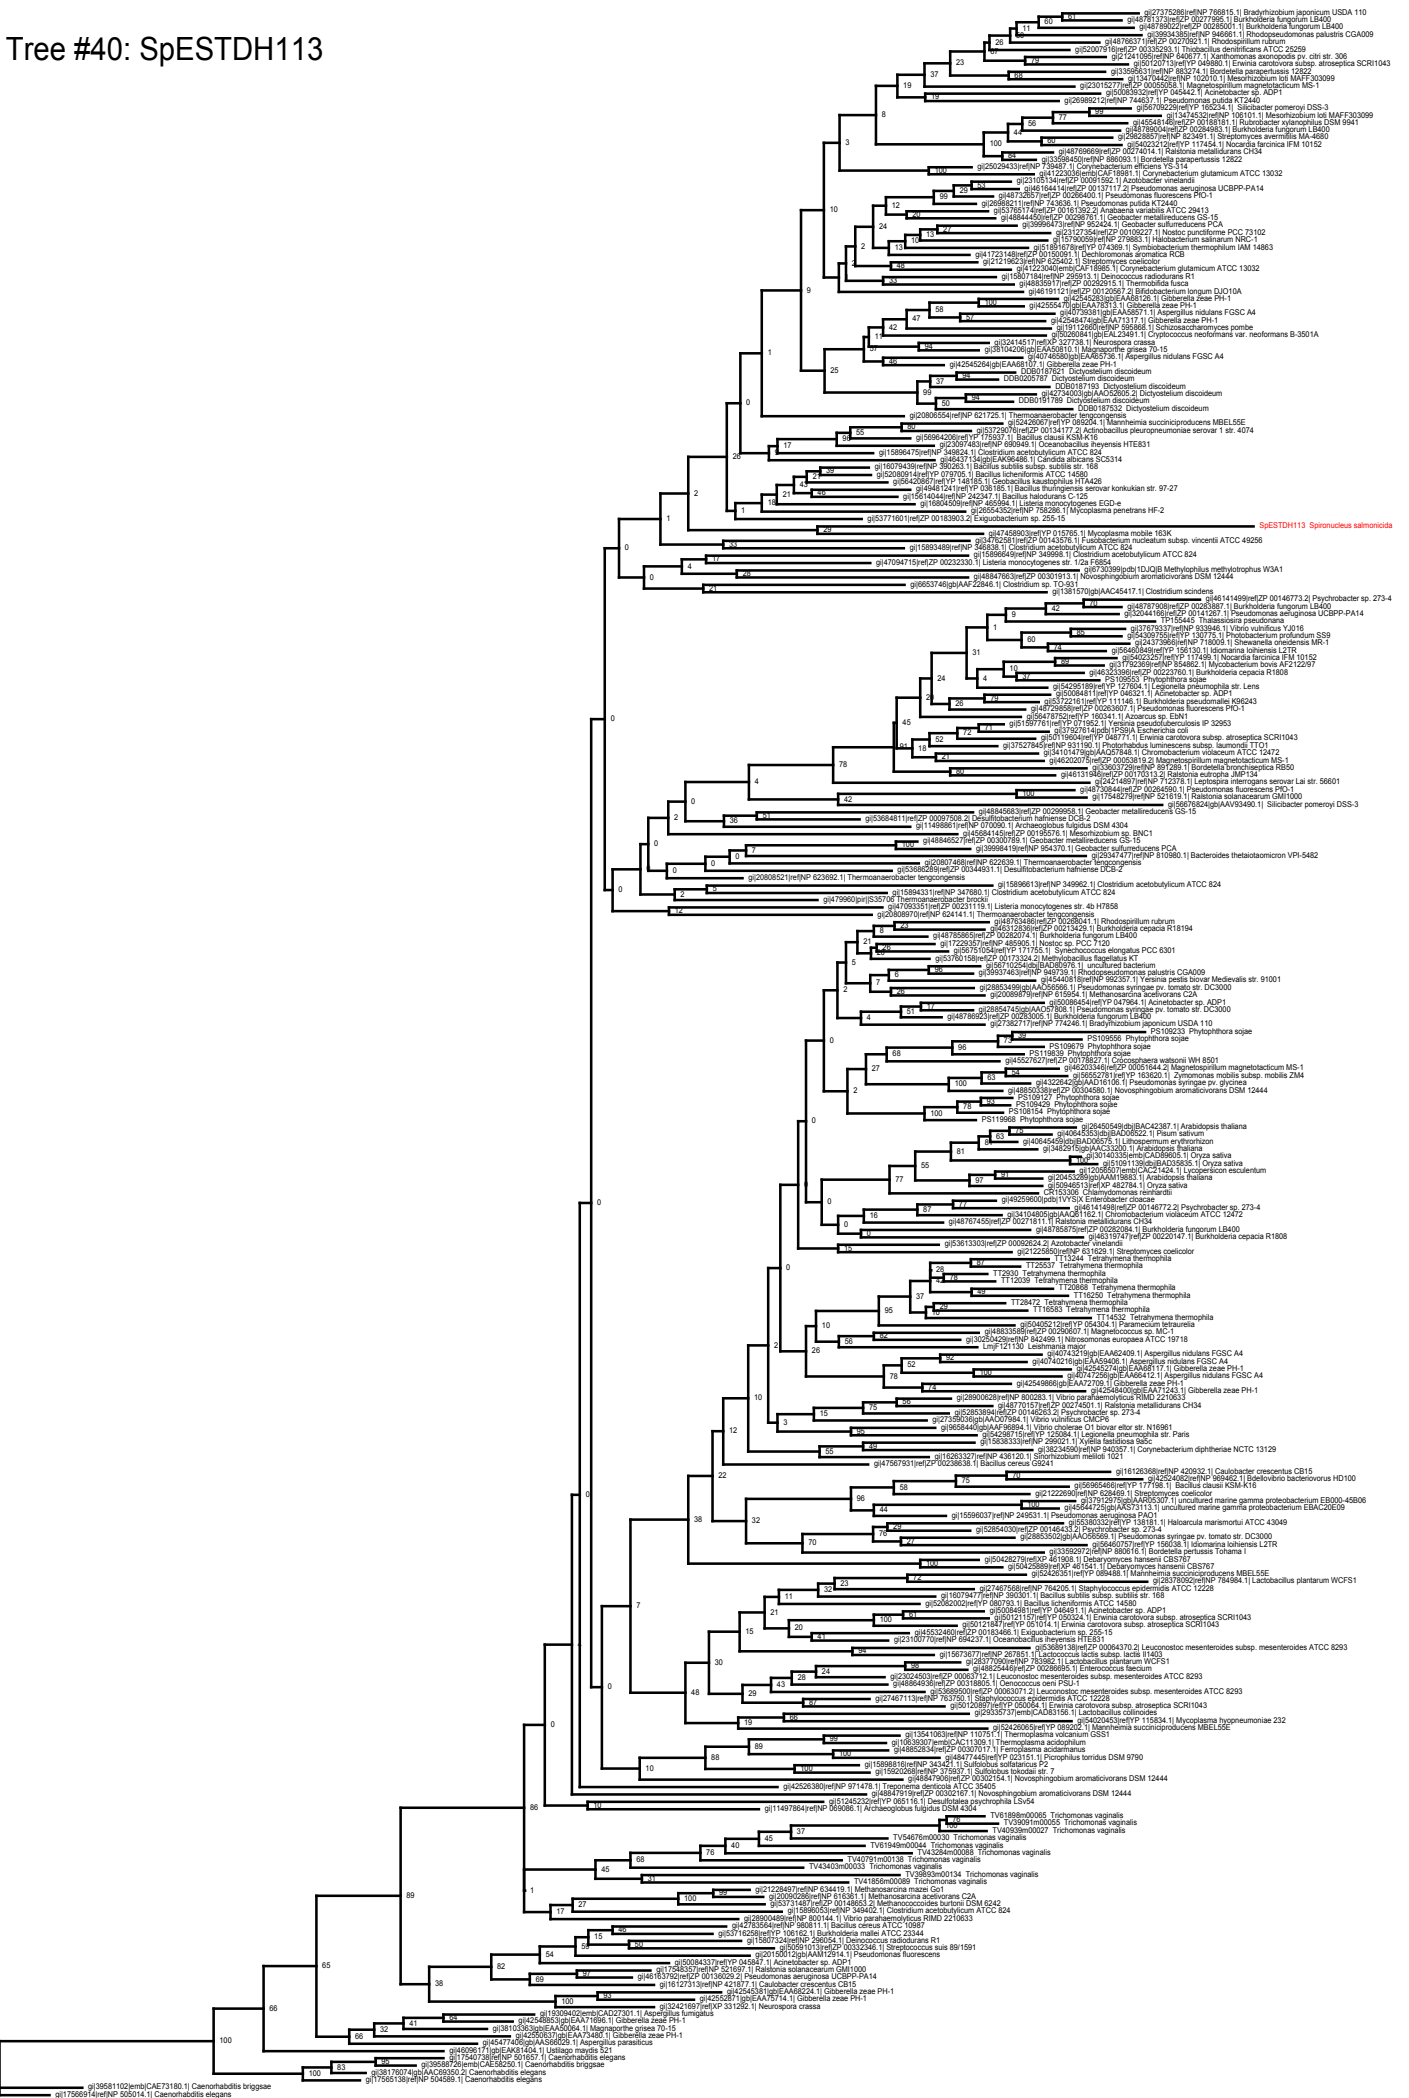

Tree #41: 11127702

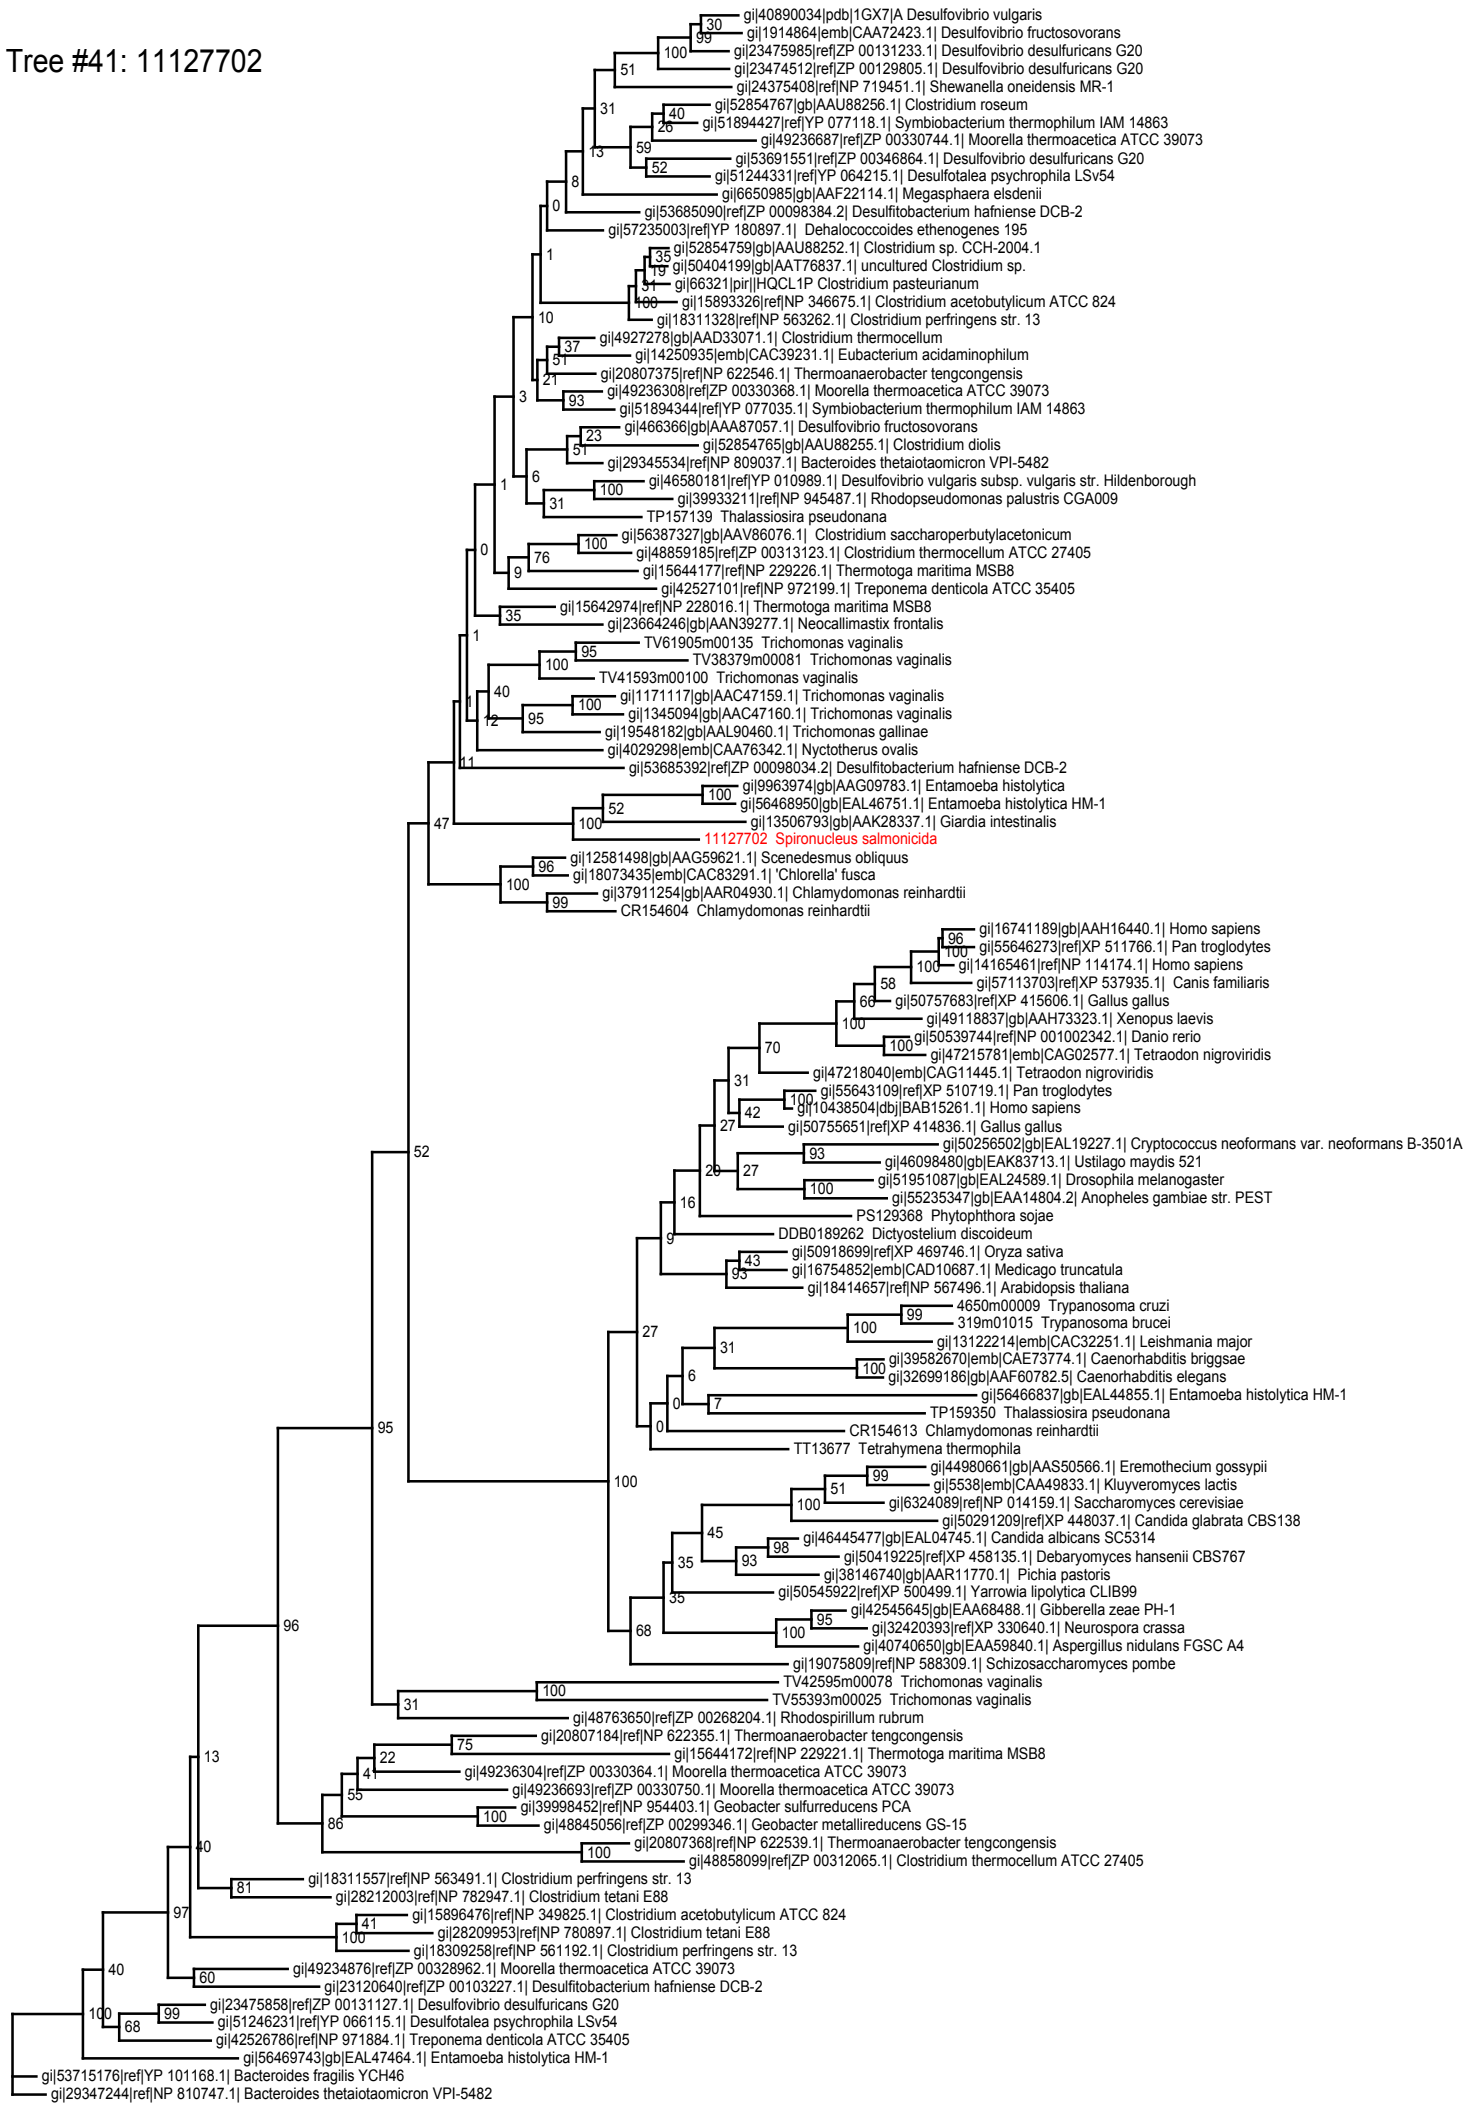



Tree #42: gTor1143gT3

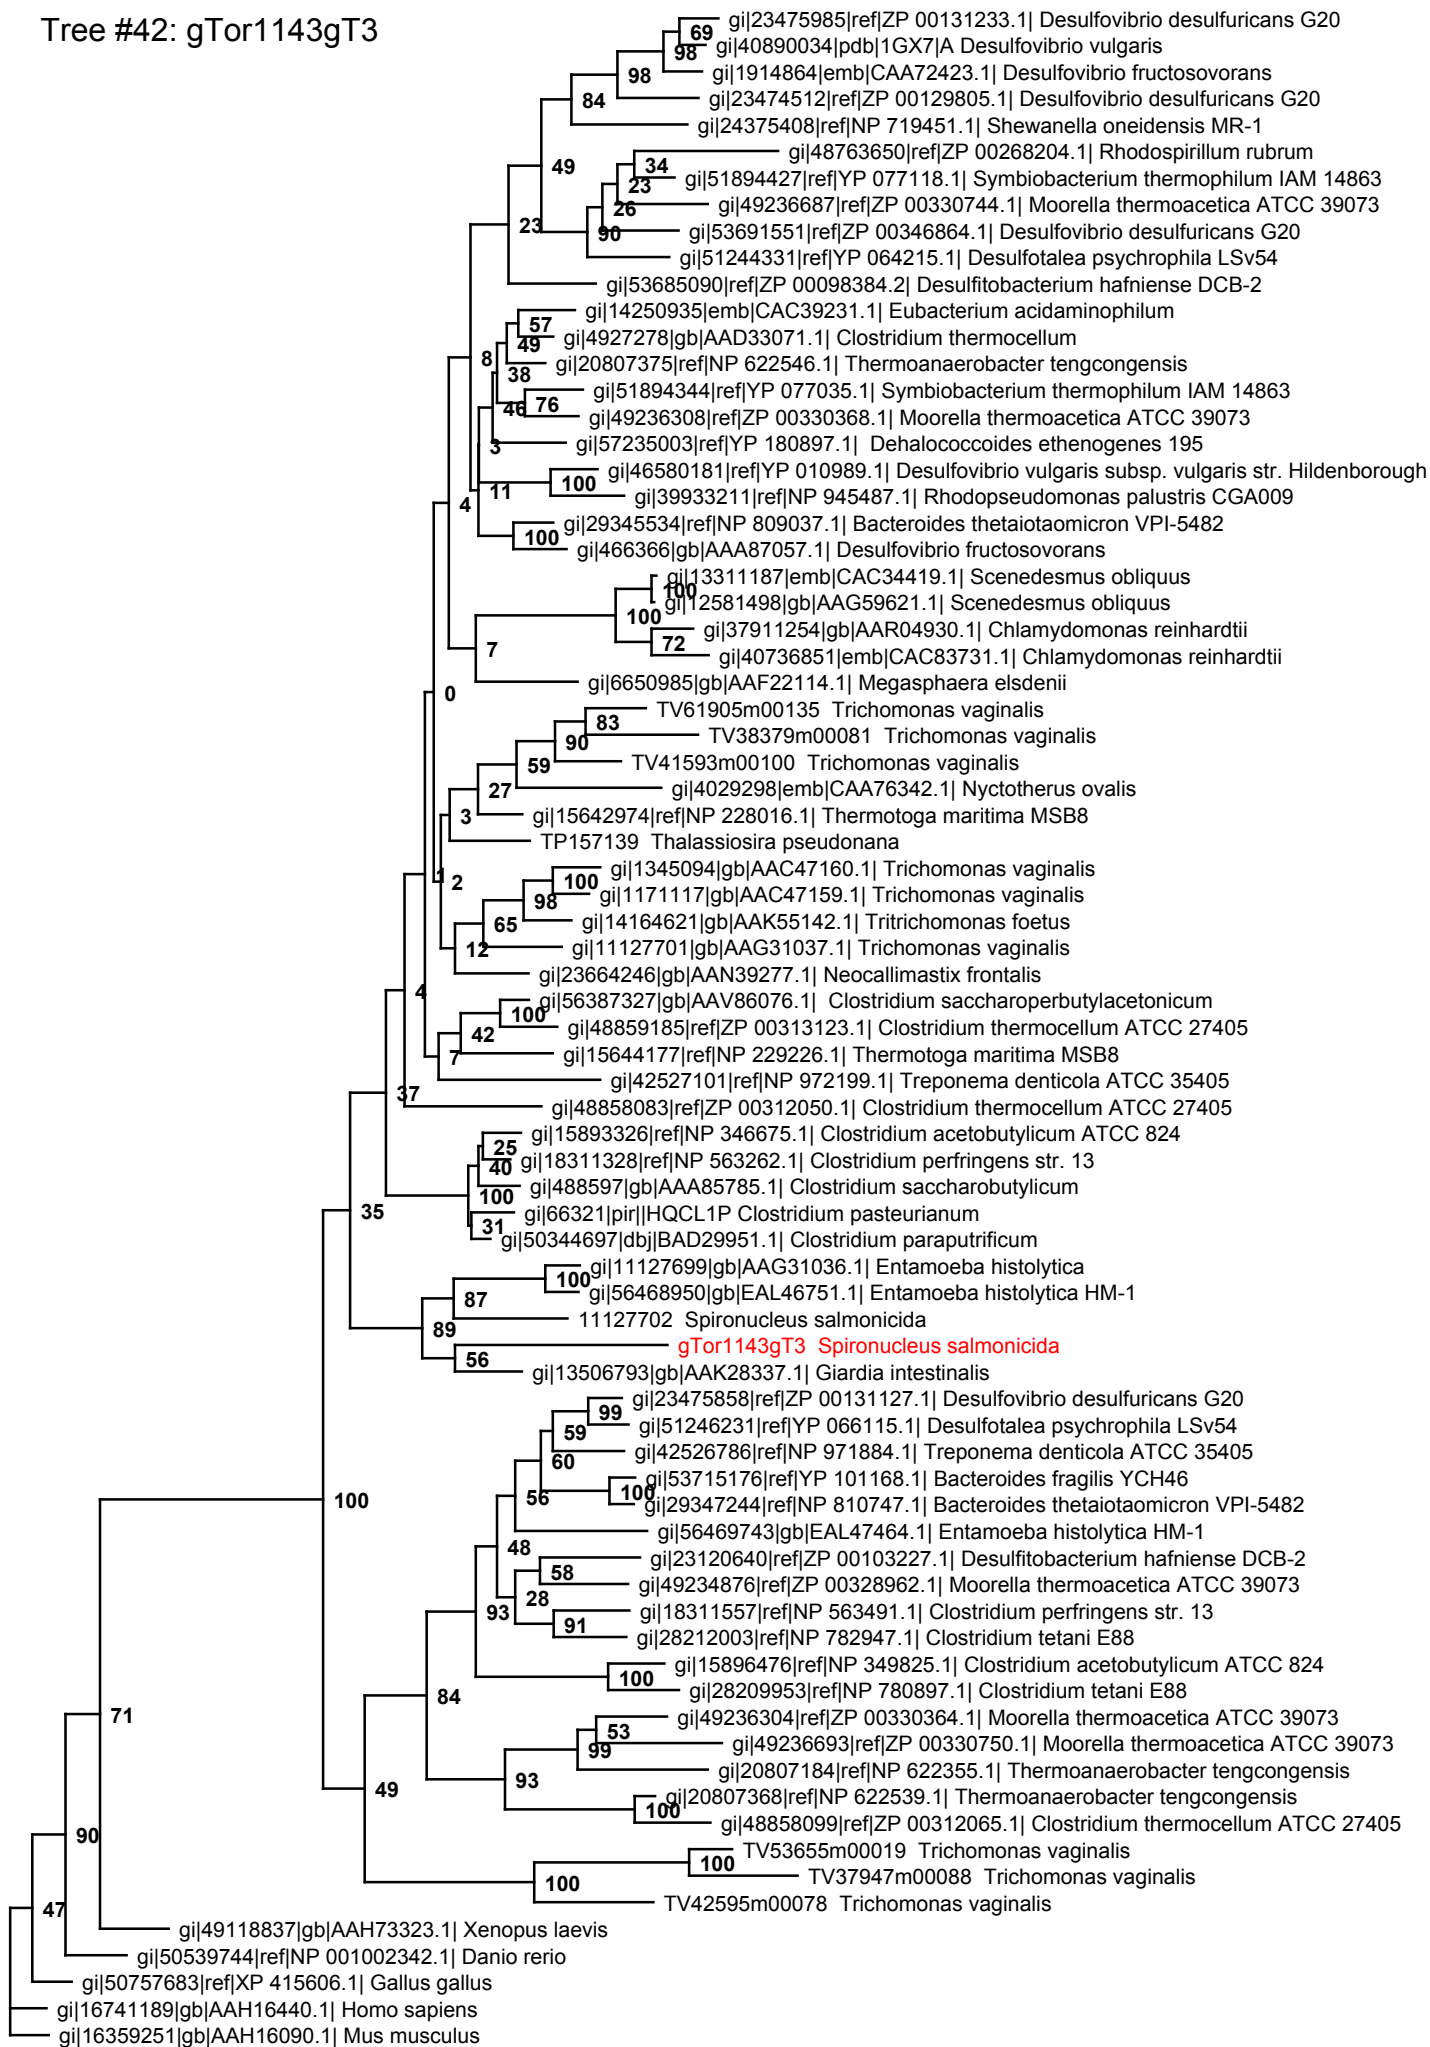

Tree #43: SpESTC115

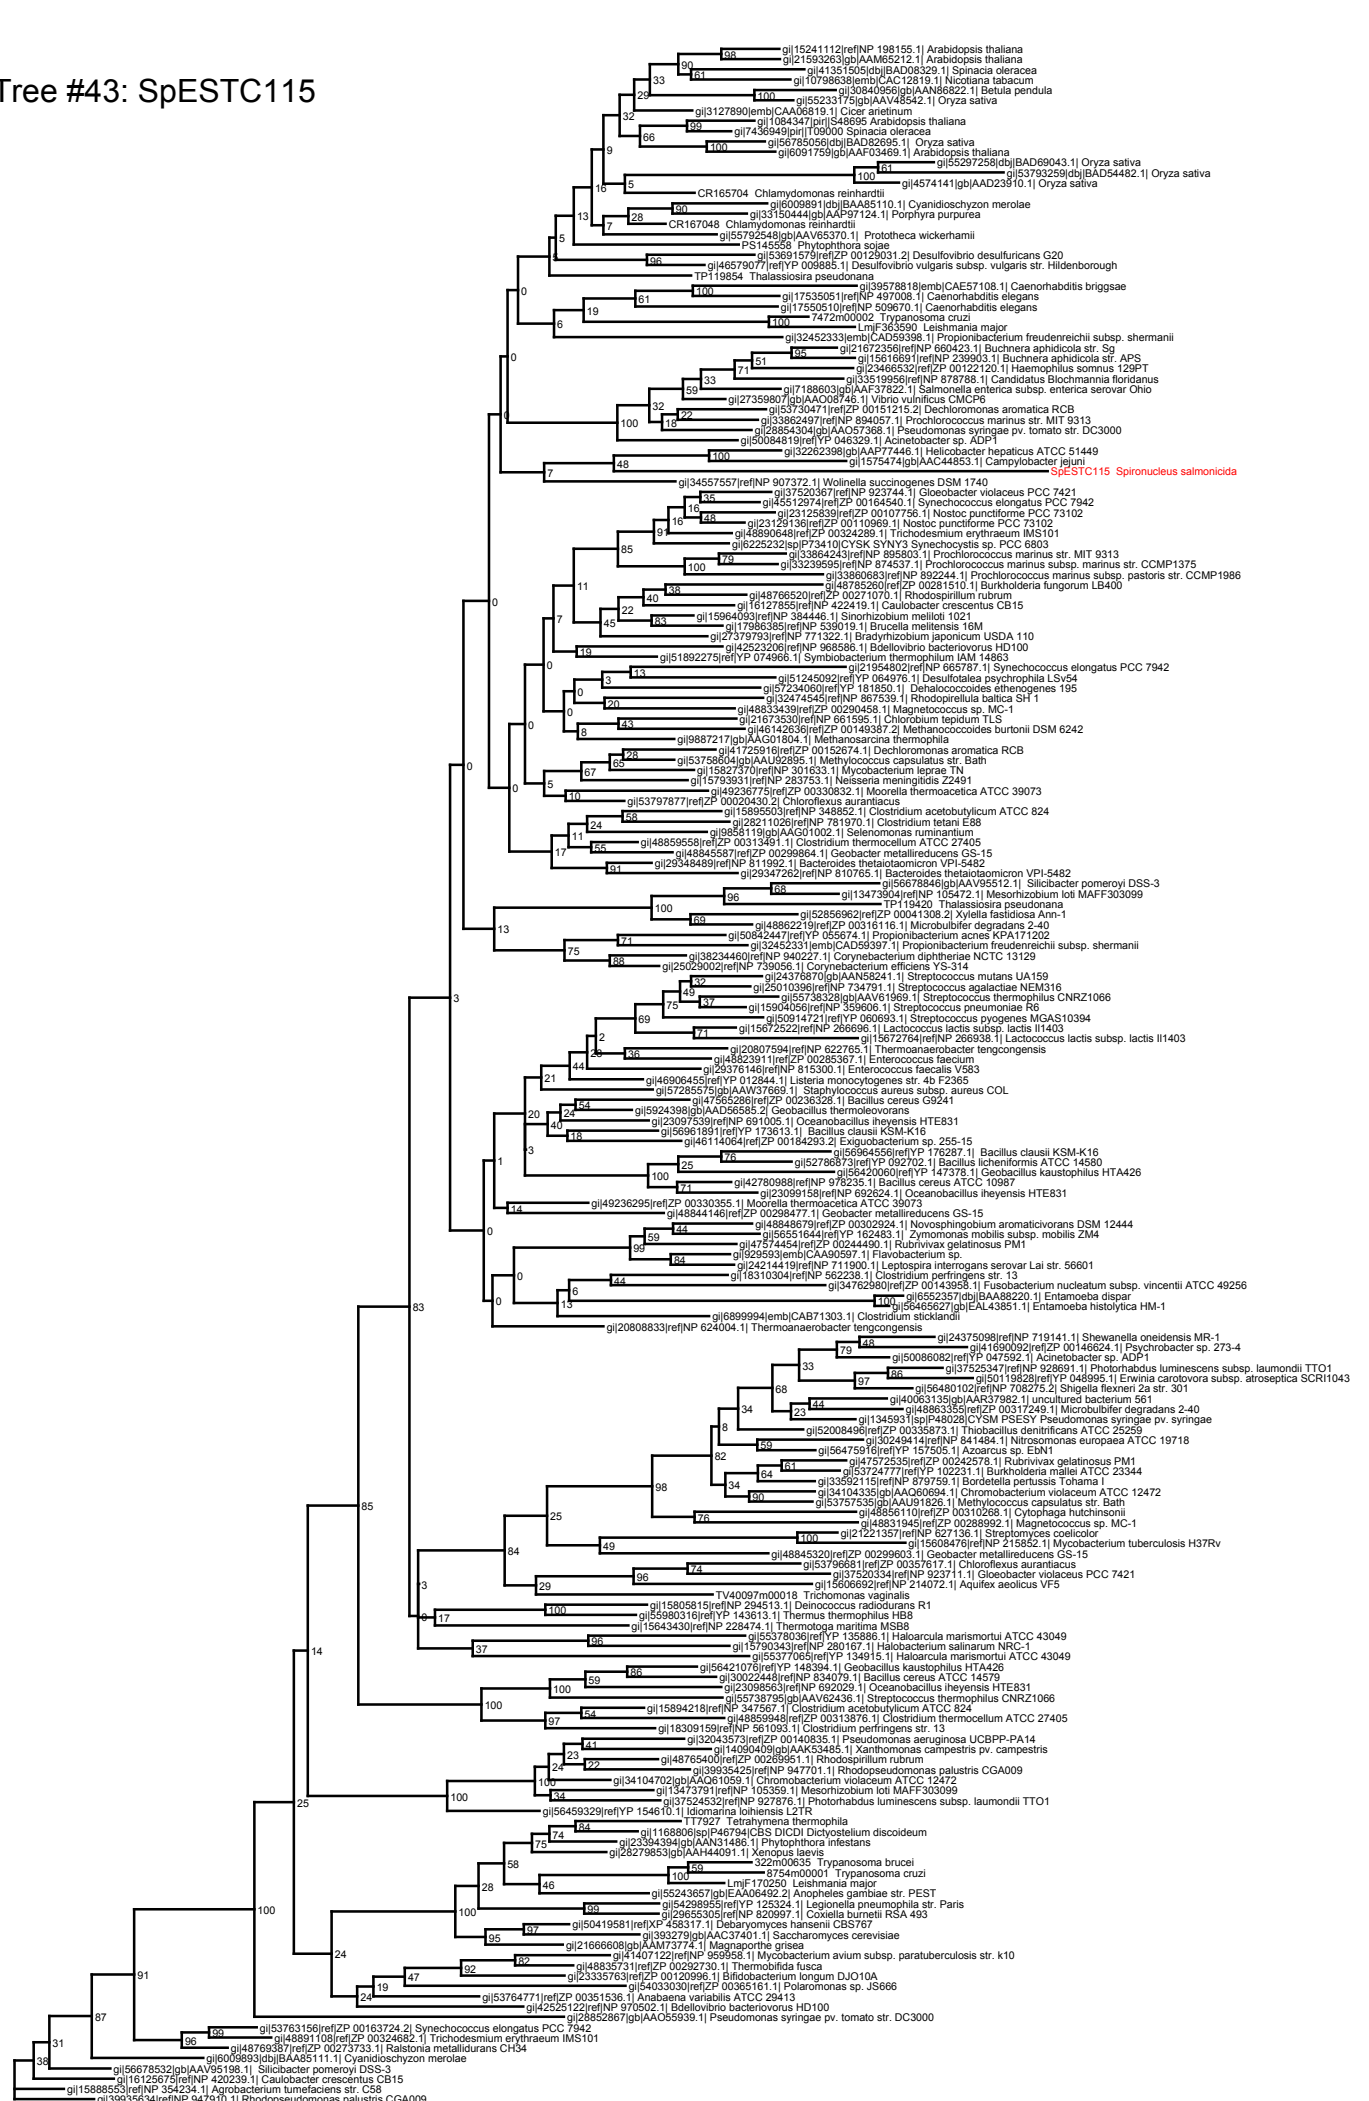

# Tree #44: SpESTZap1933

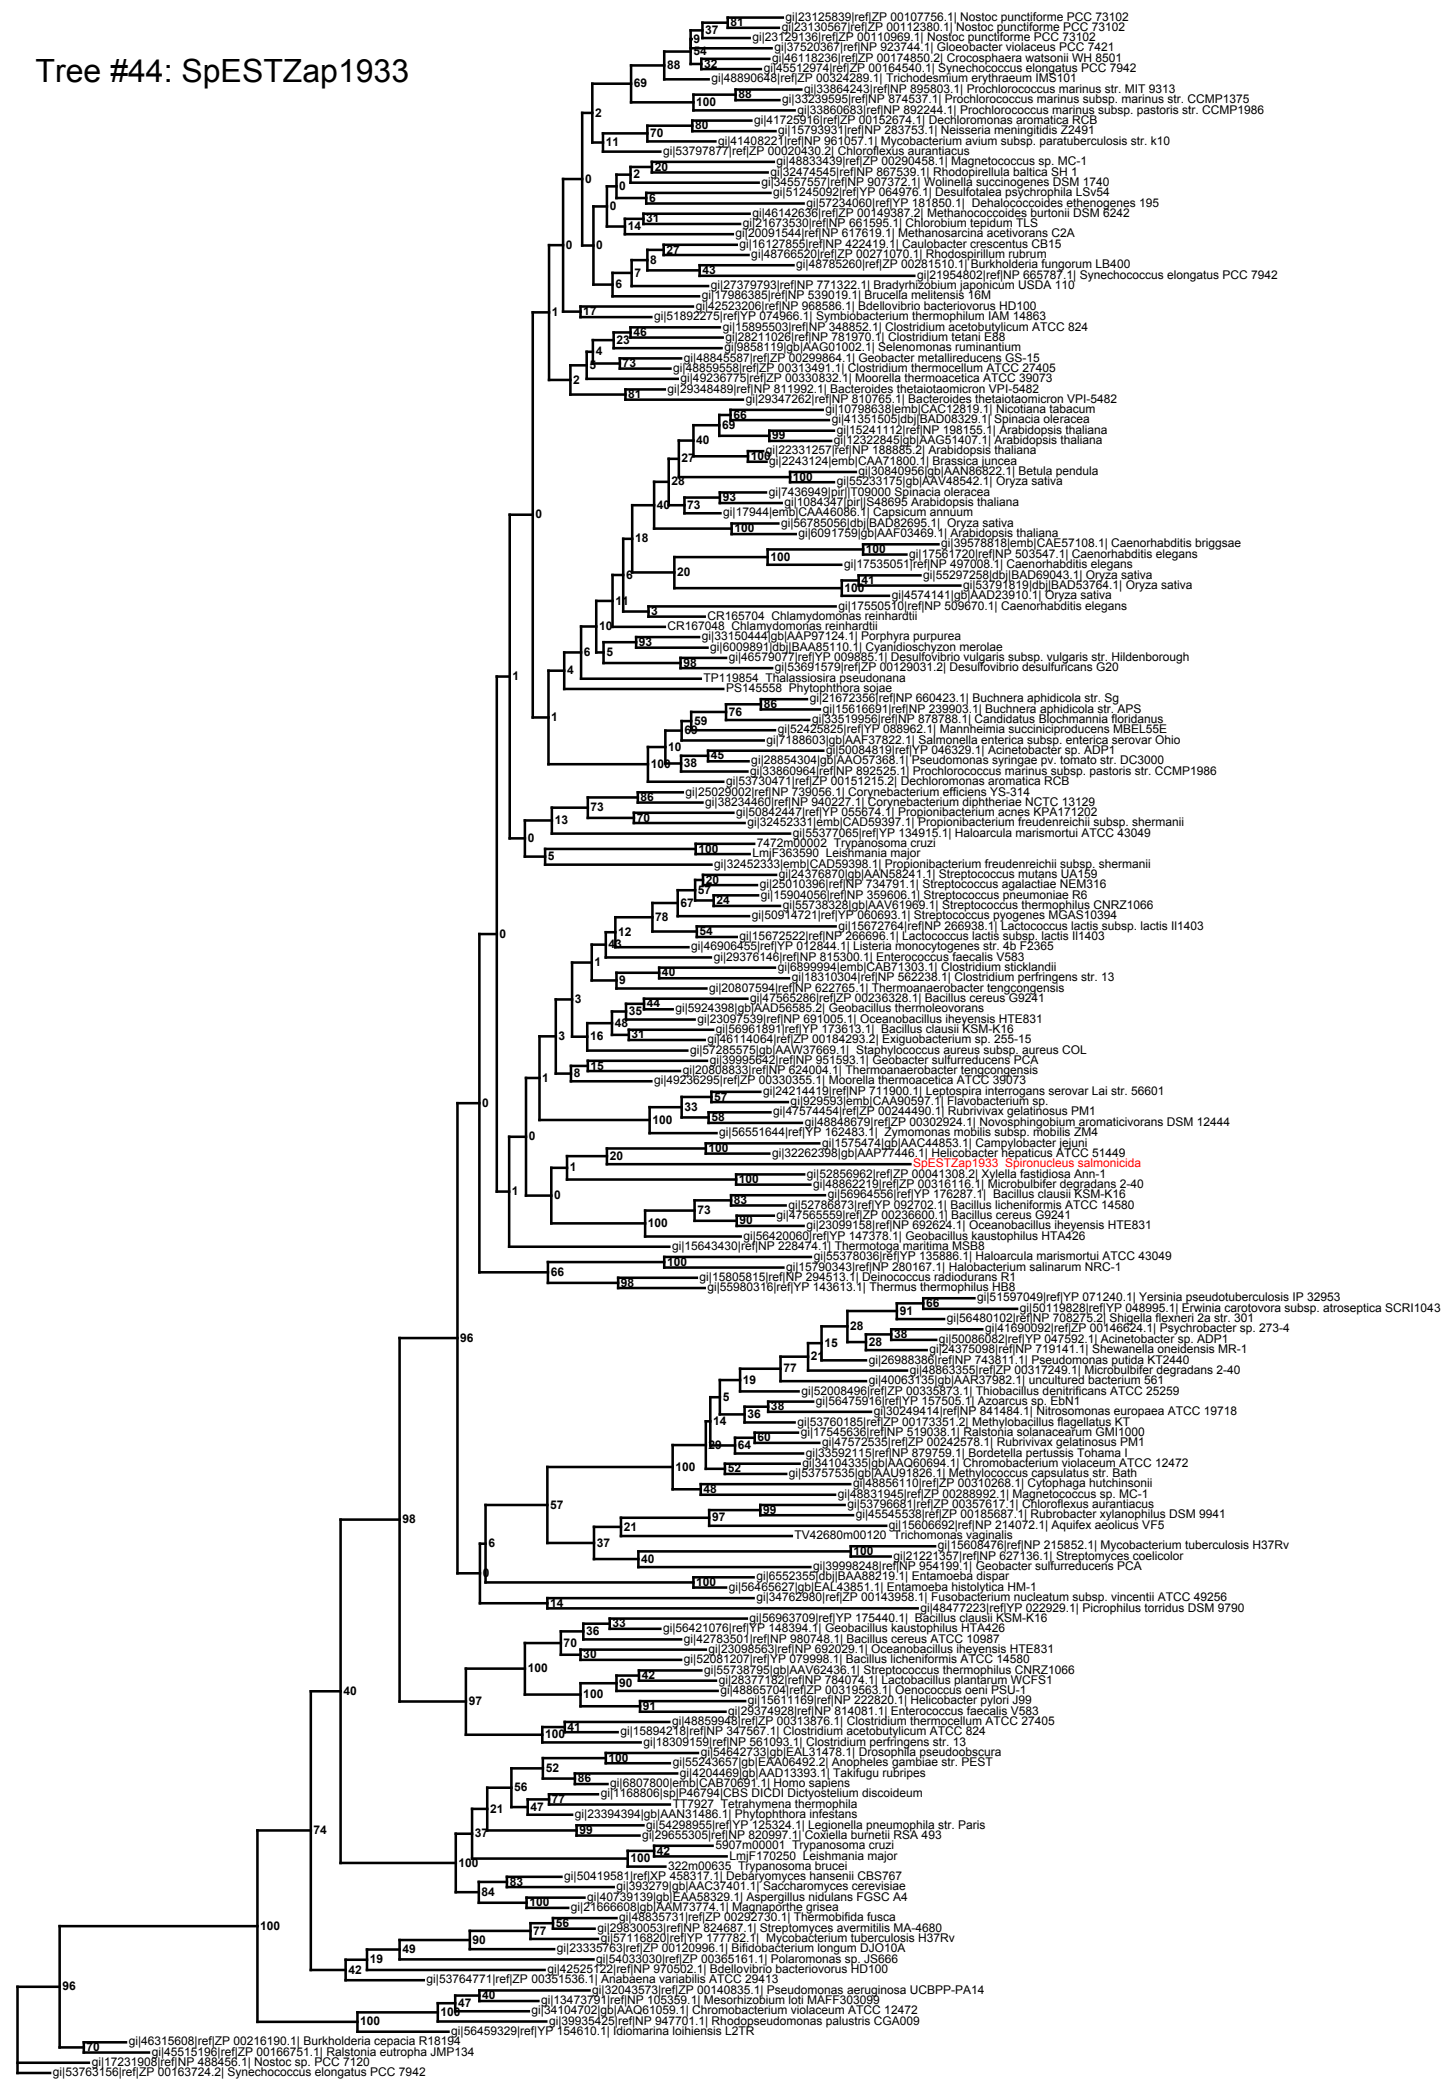

Tree #45: gZap471gT3

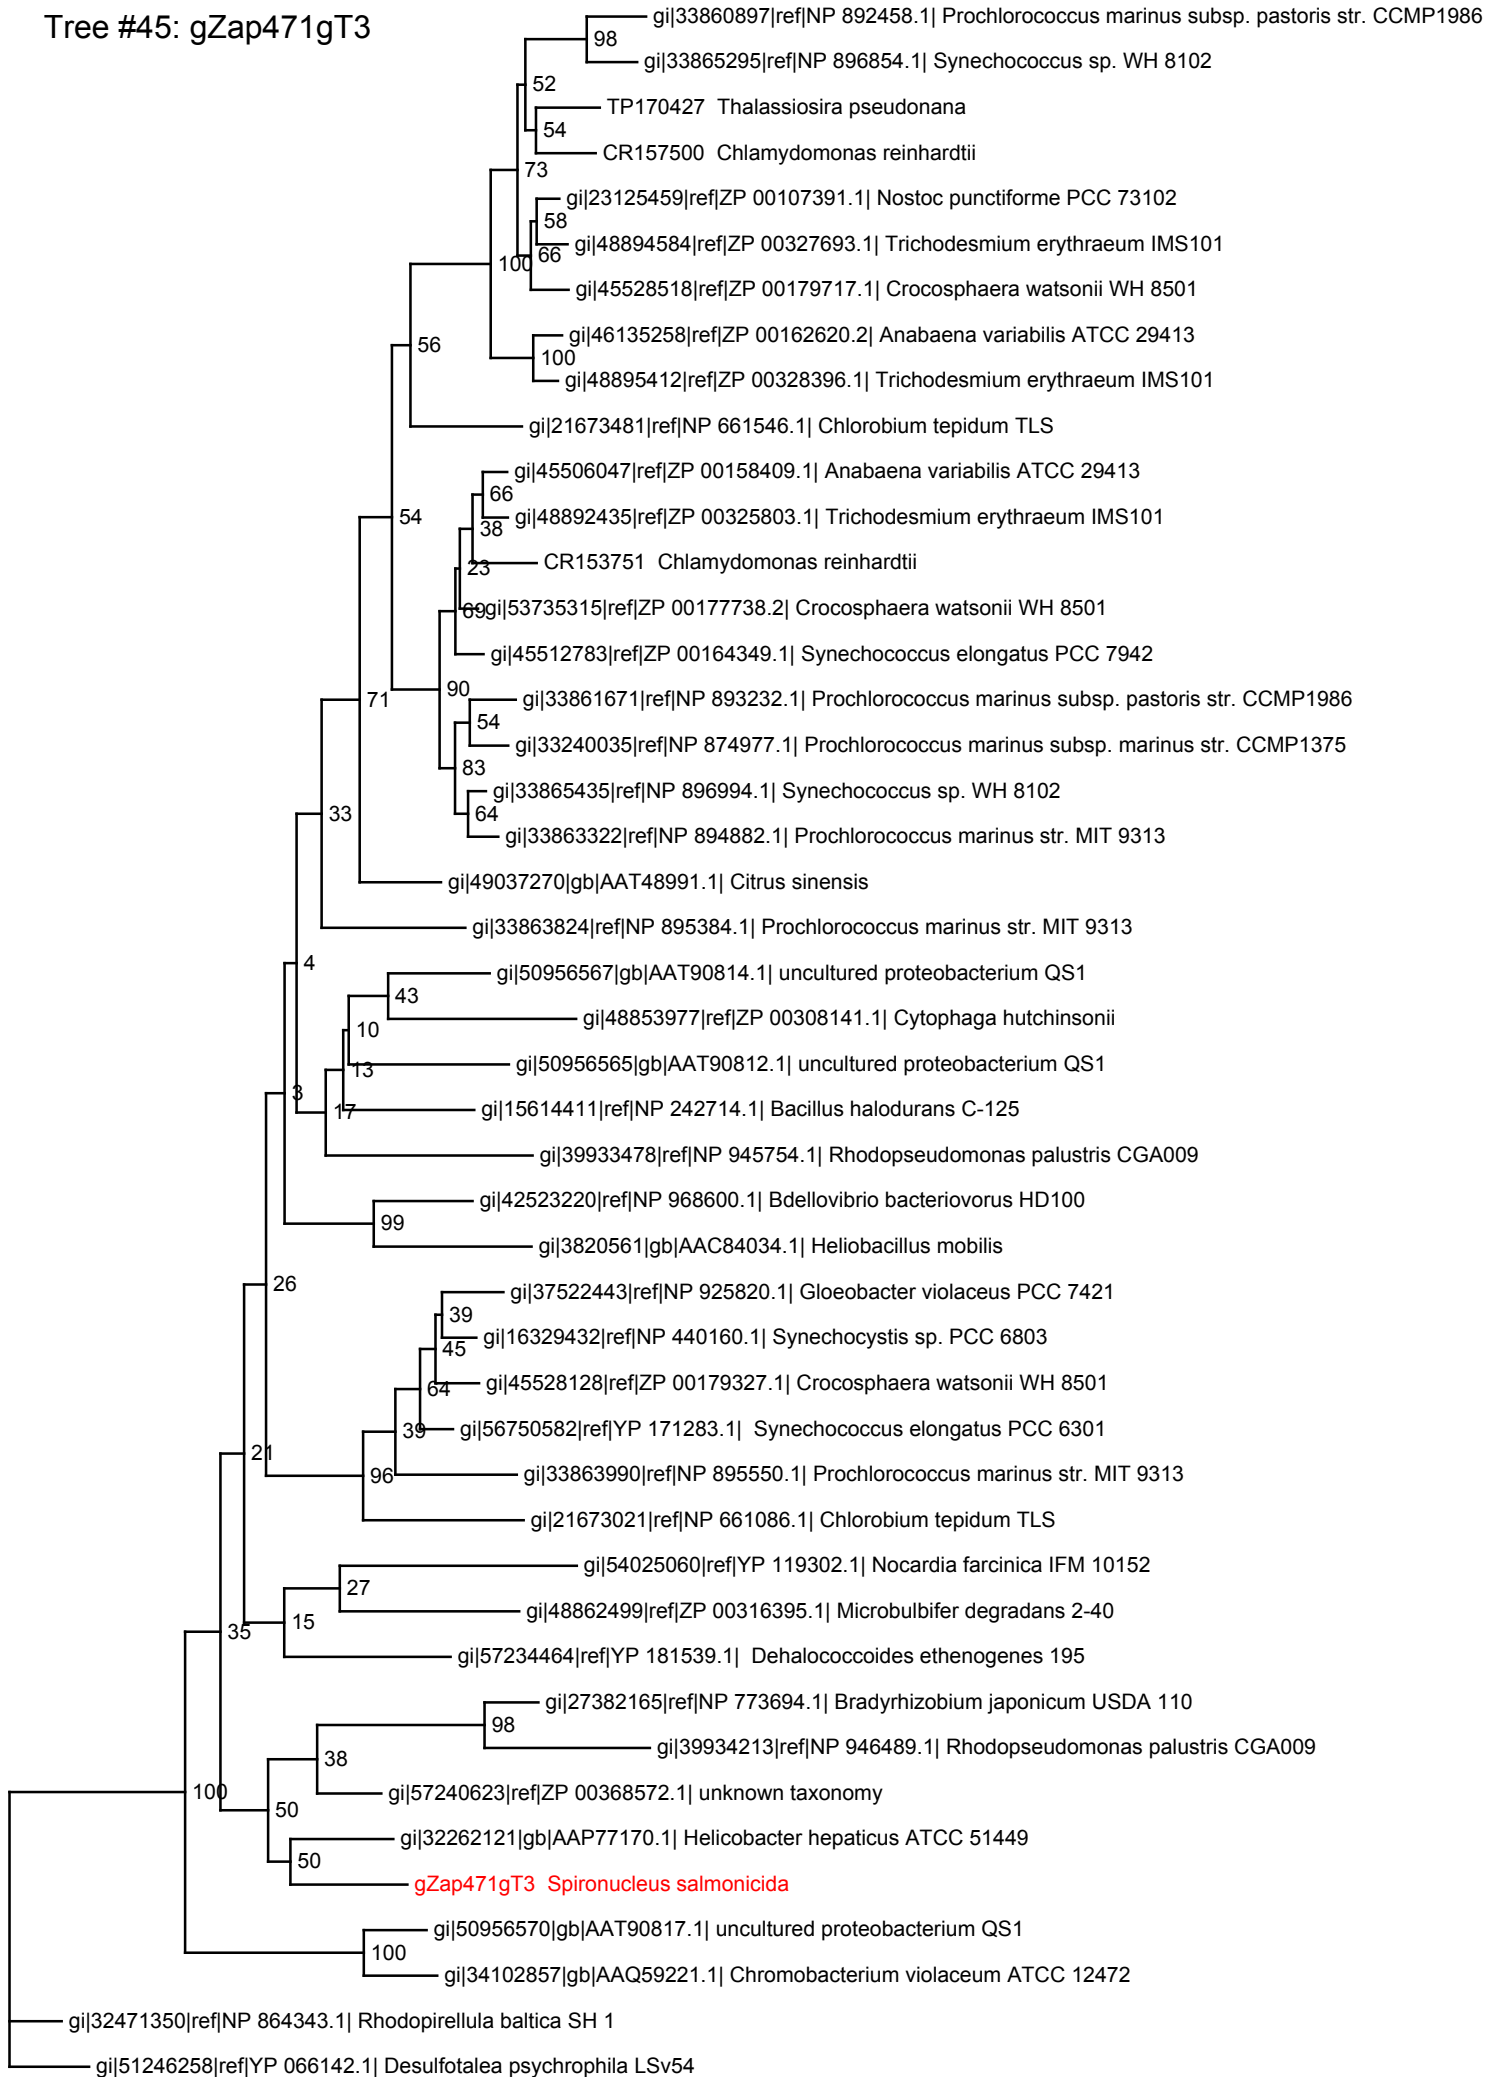



Tree #46: SpESTZap110

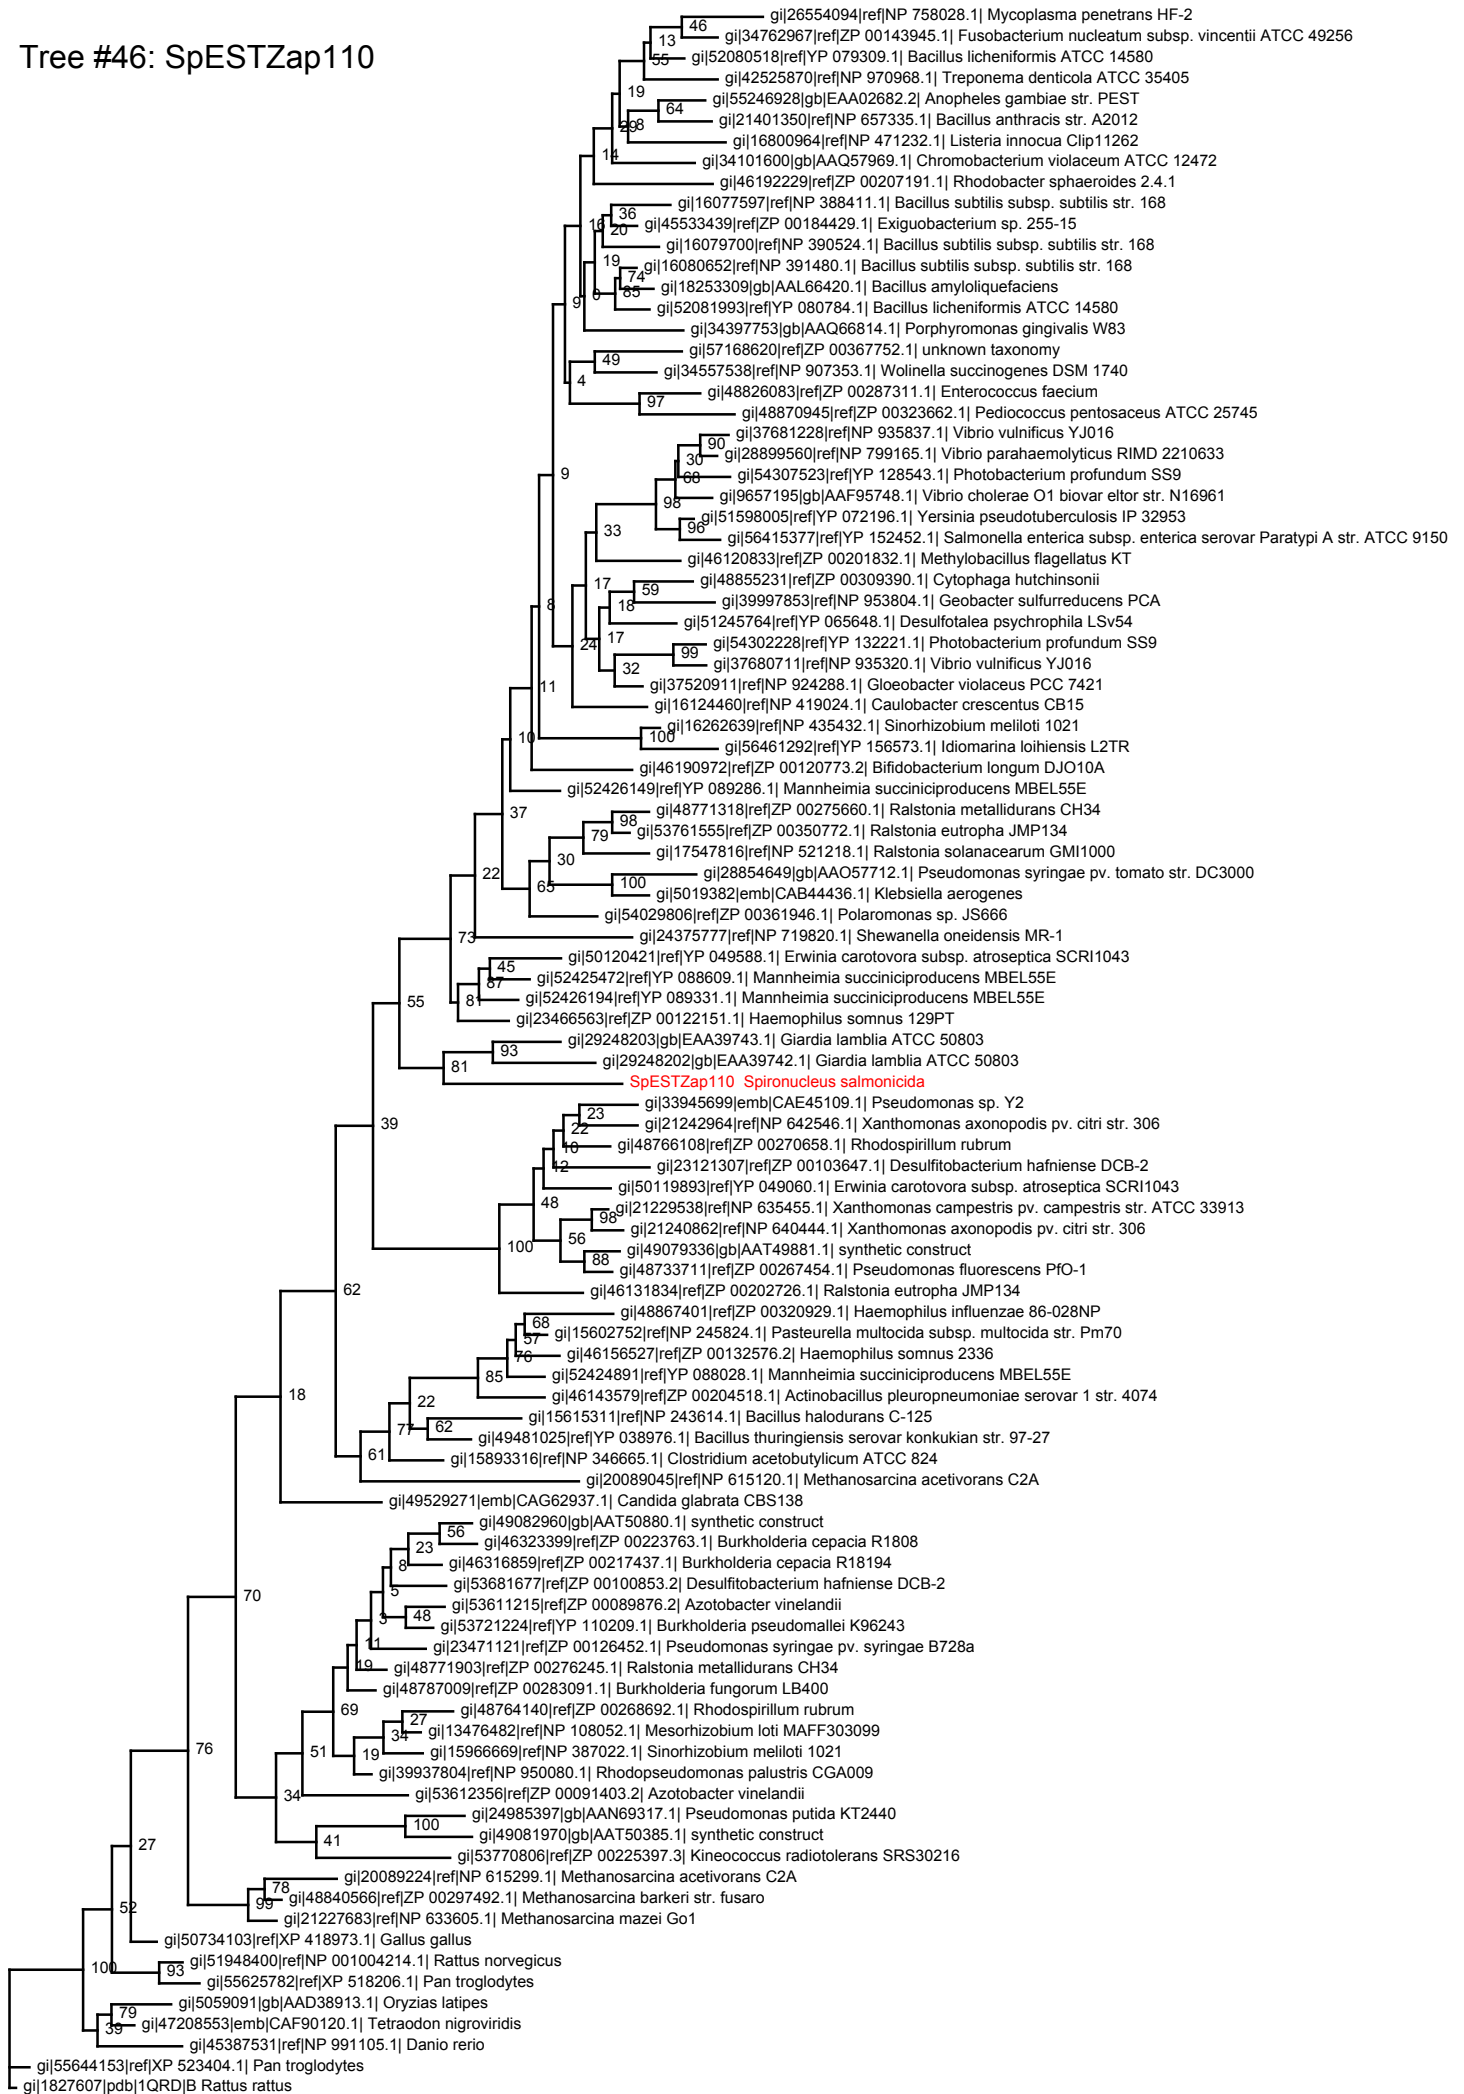

Tree #47: 27983595

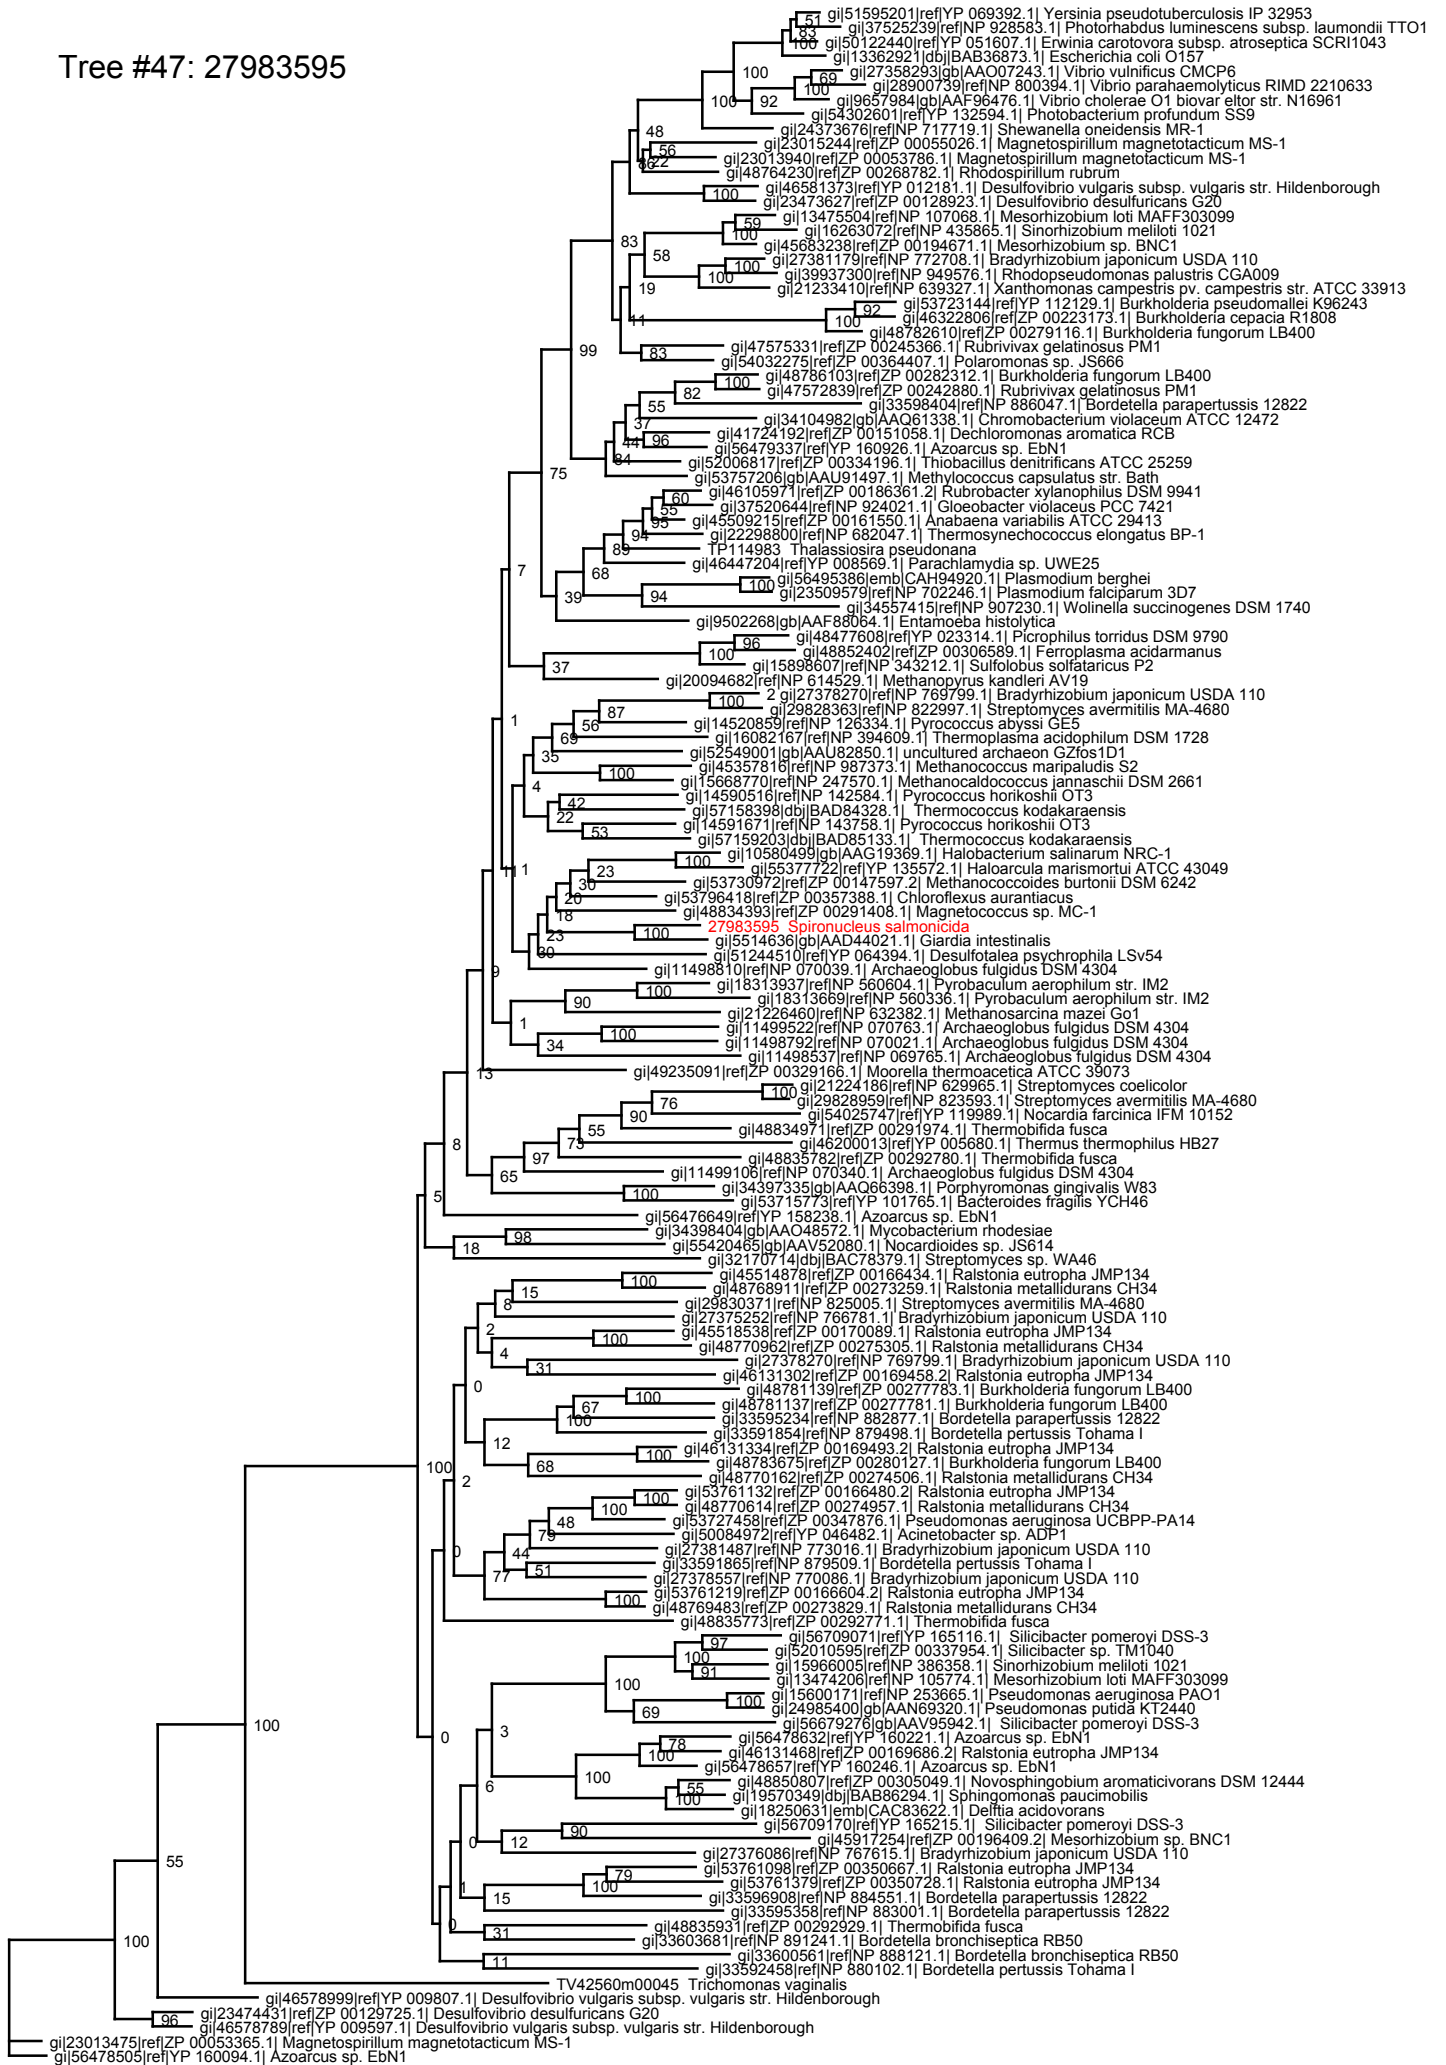

# Tree #48: SpESTZap2148

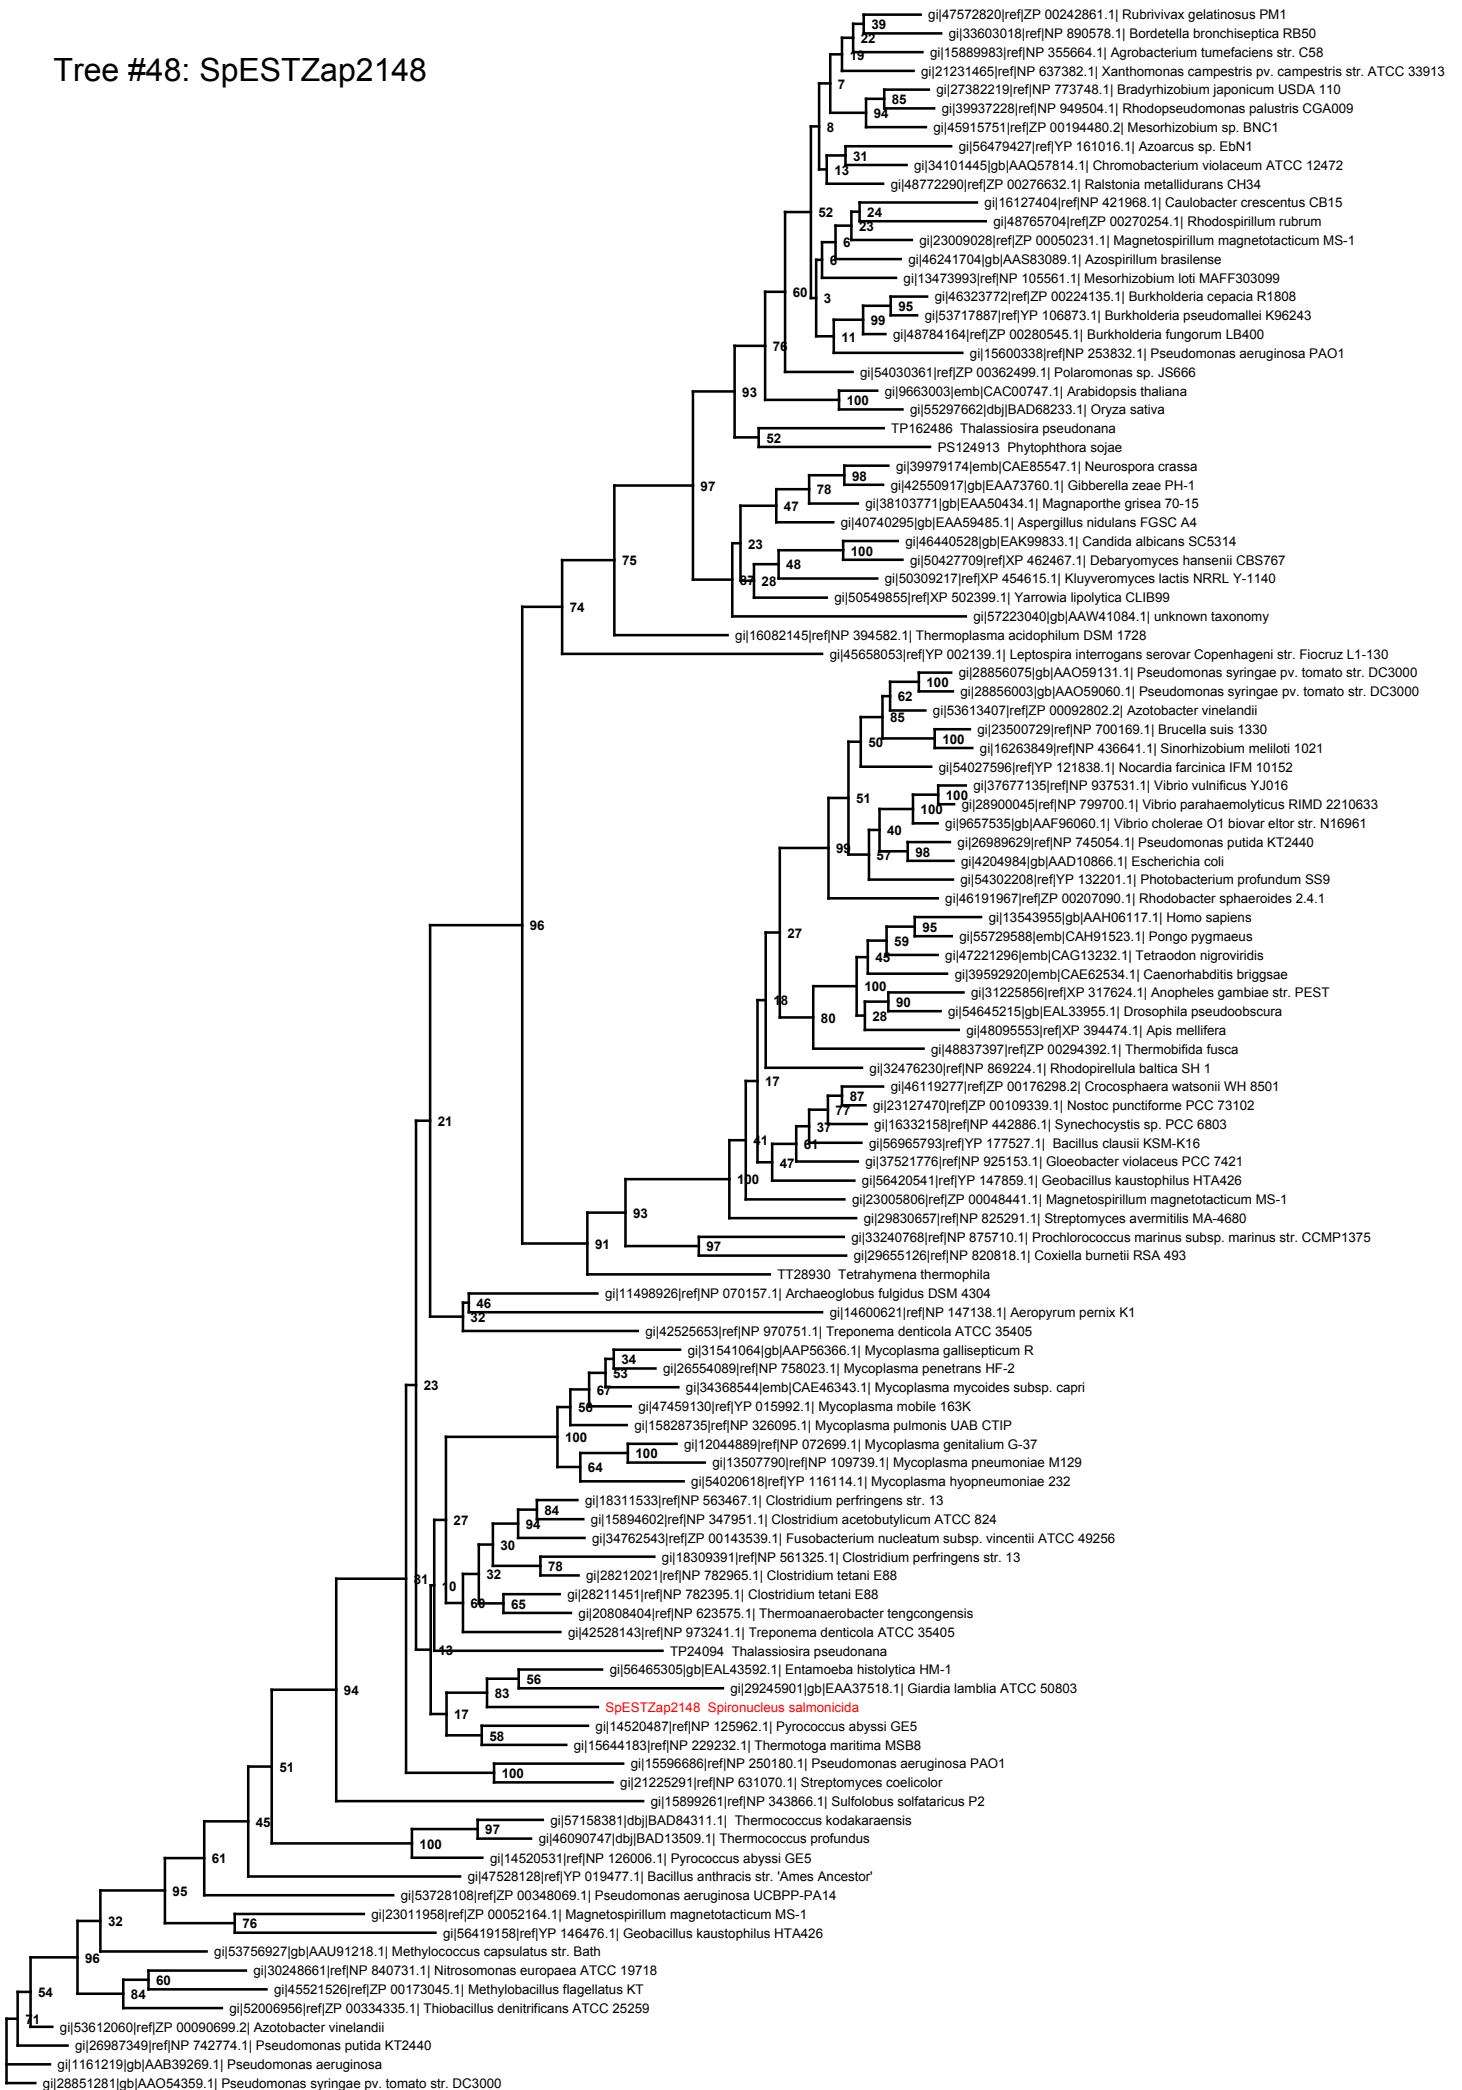

Tree #49: gTor927gT3

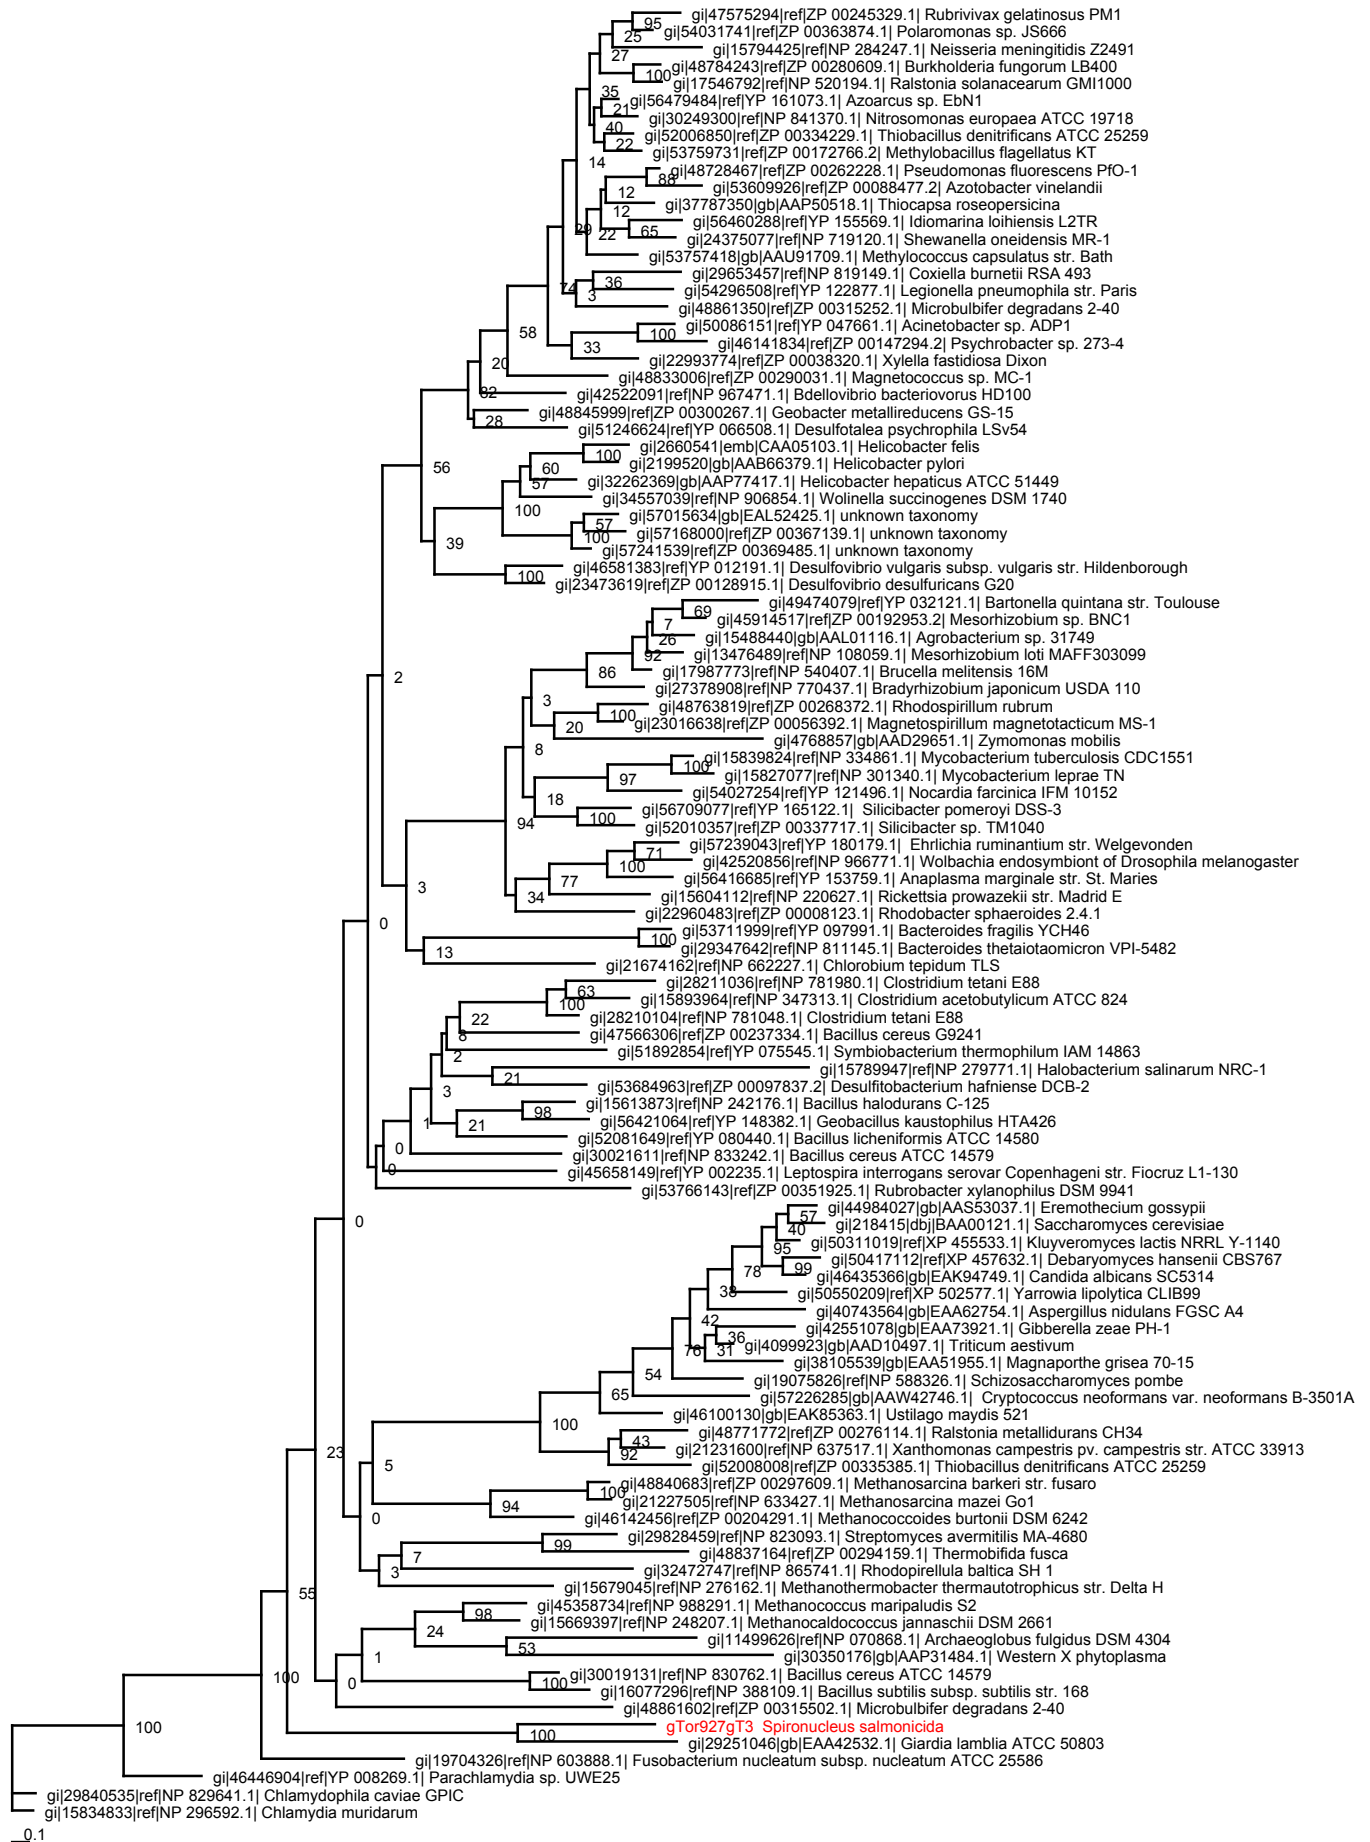



Tree #50: gZar919bT7

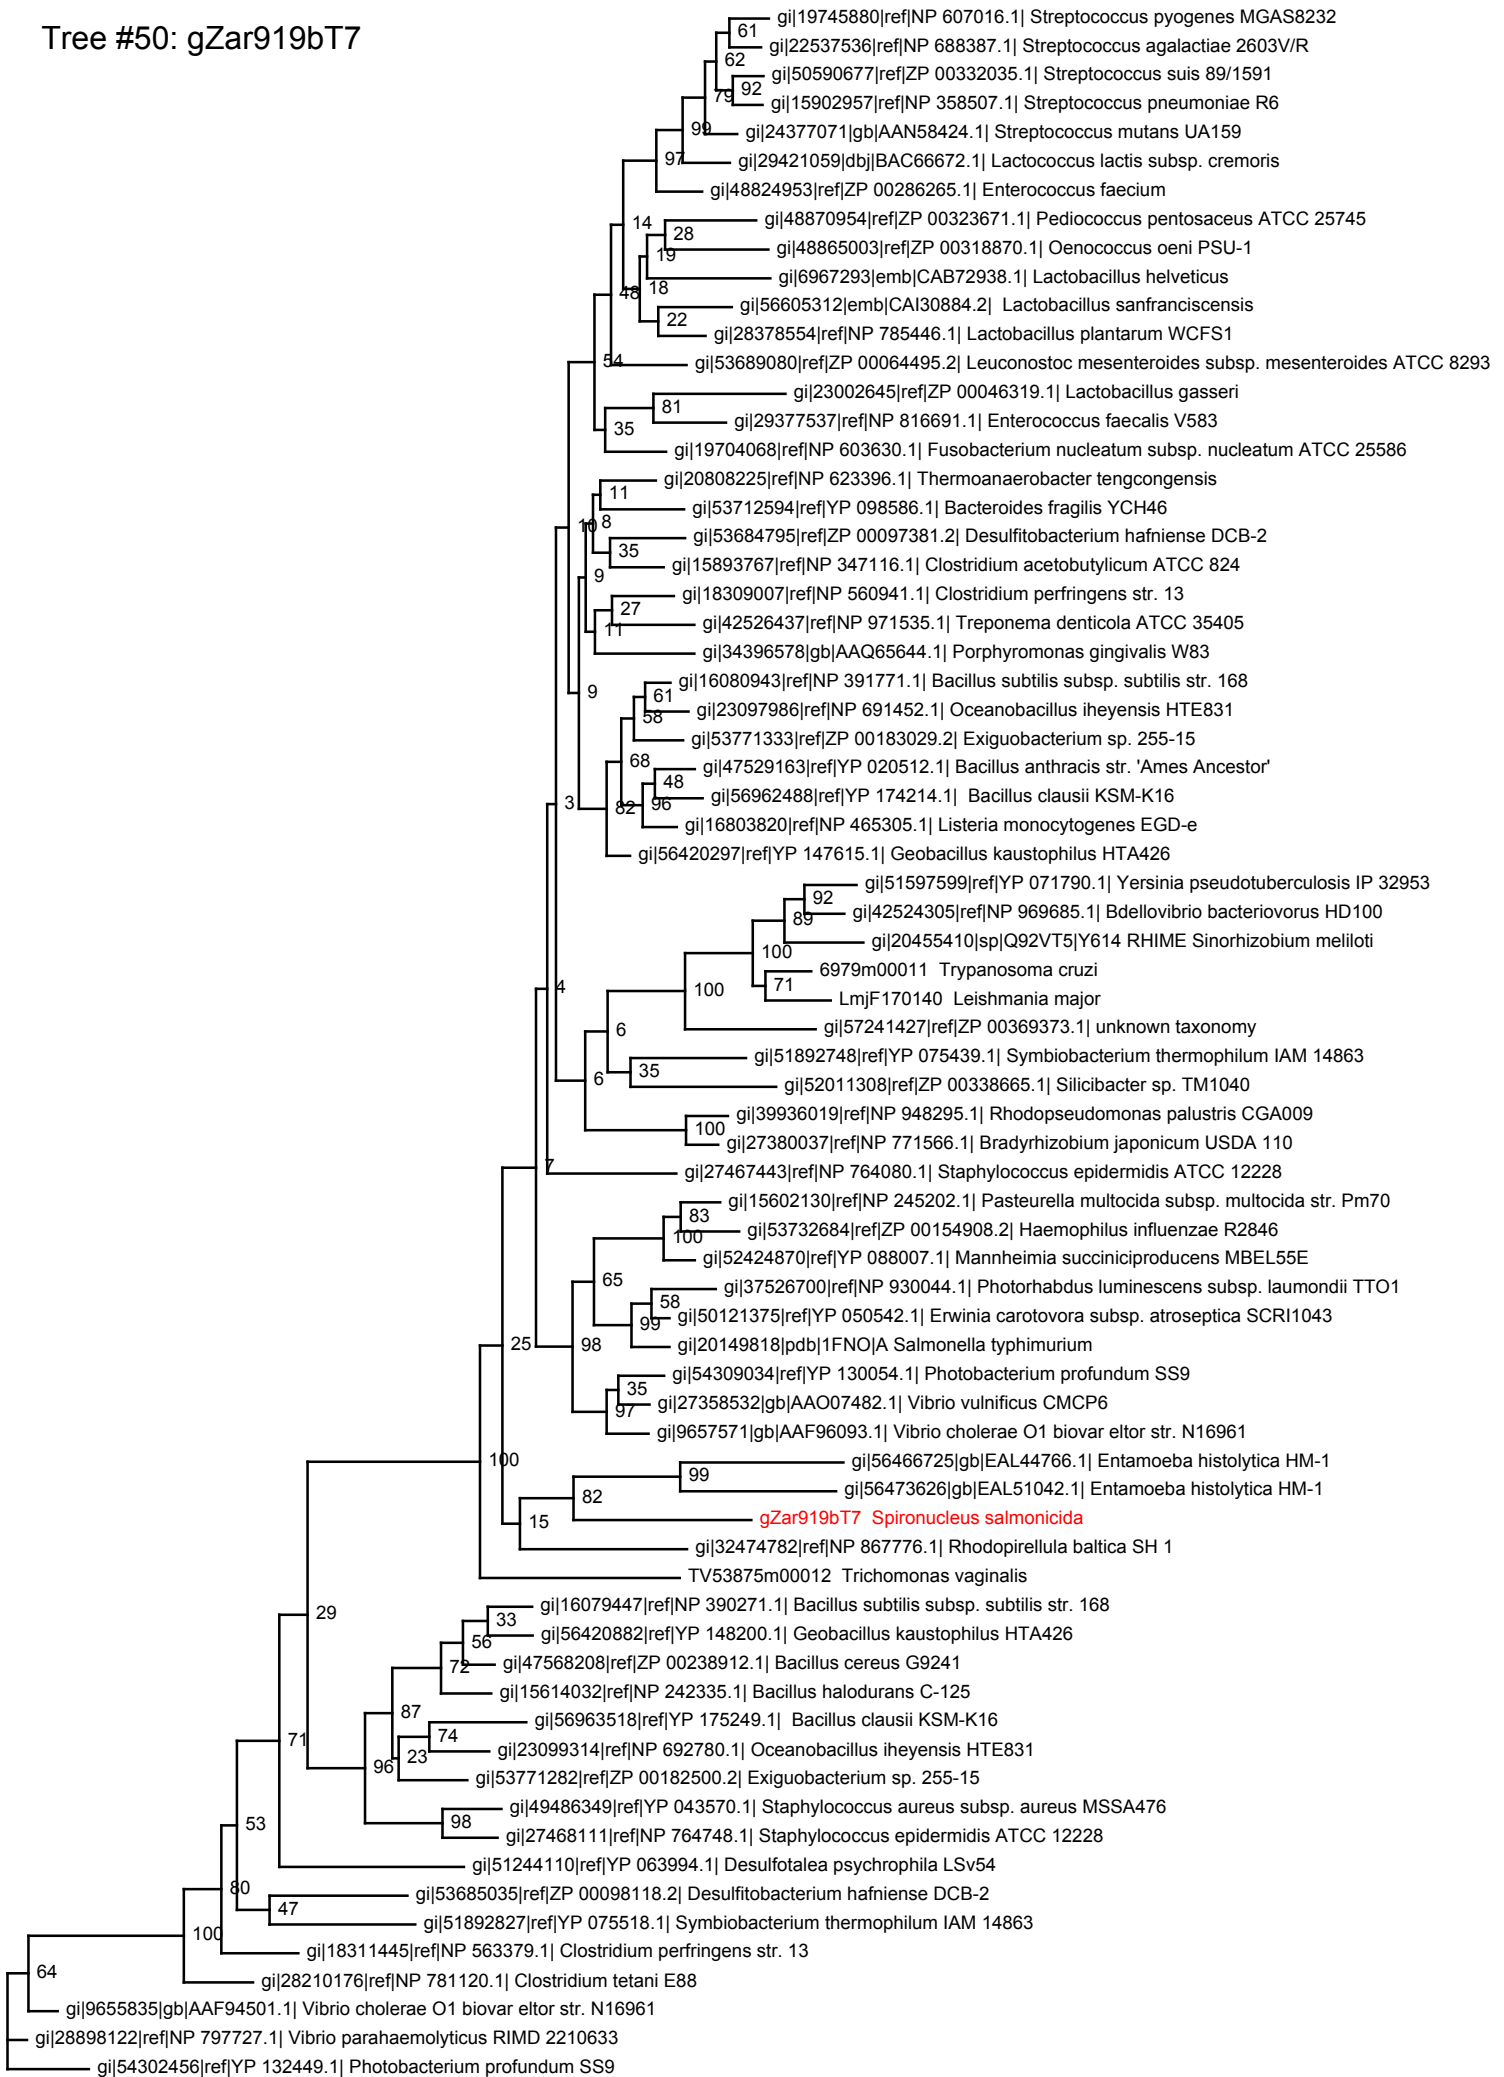

Supplement: 1471-2164-8-51-S5.pdf [file 1471-2164-8-51-S5.pdf]
