# Supplementary material for: A genomic survey of the fish parasite Spironucleus salmonicida indicates genomic plasticity among diplomonads and significant lateral gene transfer in eukaryote genome evolution
Source: PubMed Central journal article supplement (PMC1805757; doi:10.1186/1471-2164-8-51), 2007-02-14

# Additional file 6 - Andersson et al.

Phylogenetic trees 51-72 for genes putatively involved in LGT events and listed in Additional file 3.

Tree #51: SpESTC154

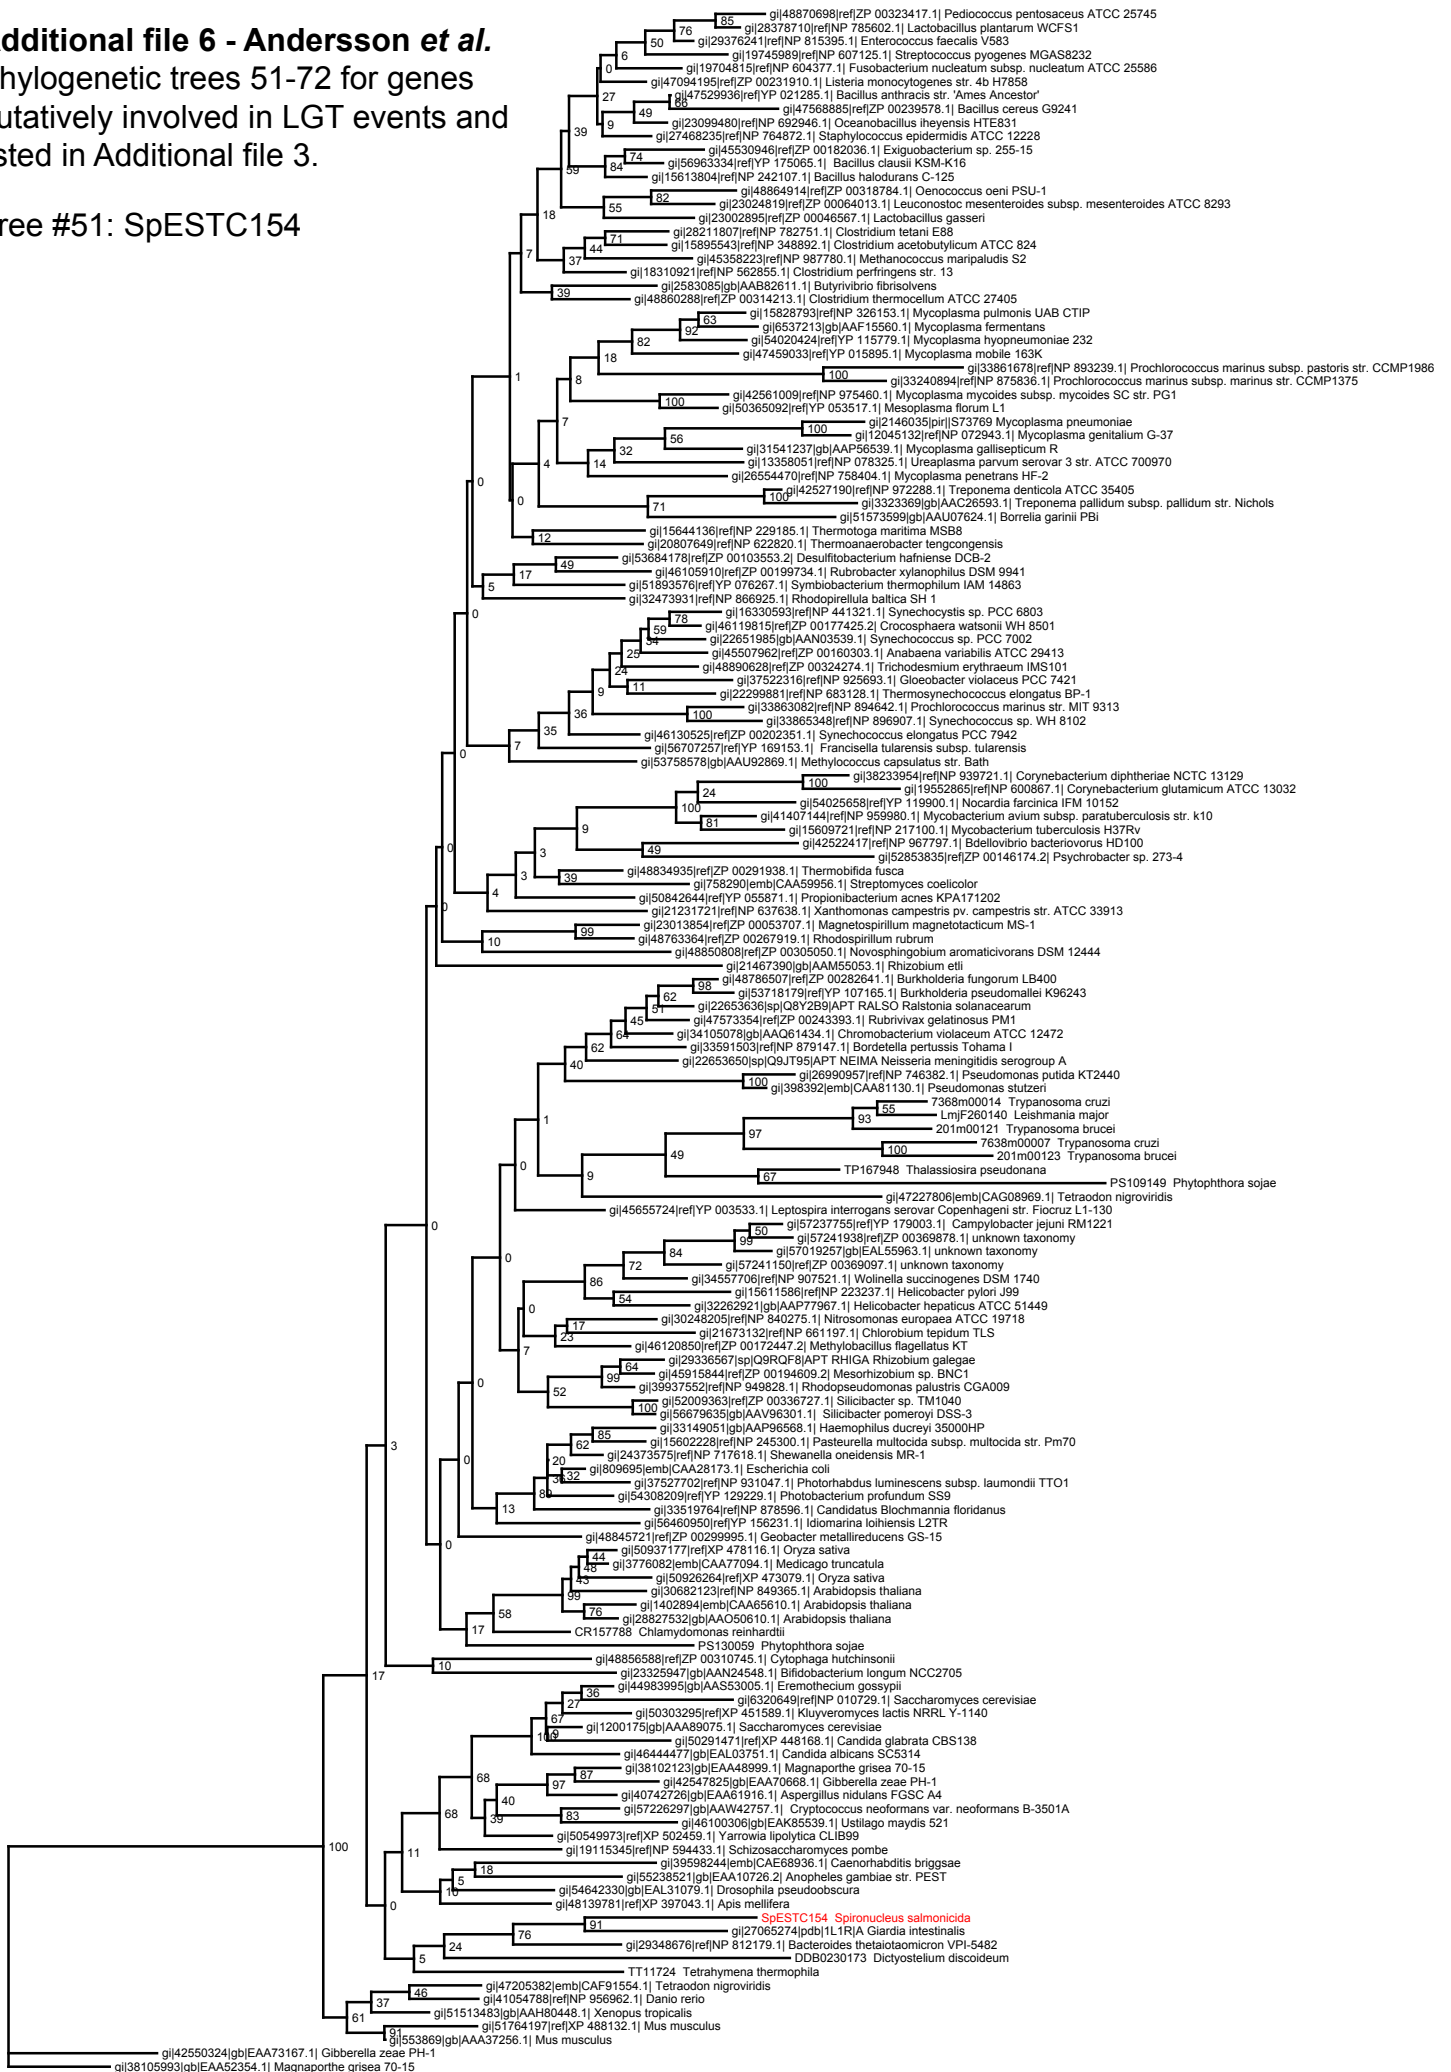

Tree #52: SpESTC251,  
SpESTC254

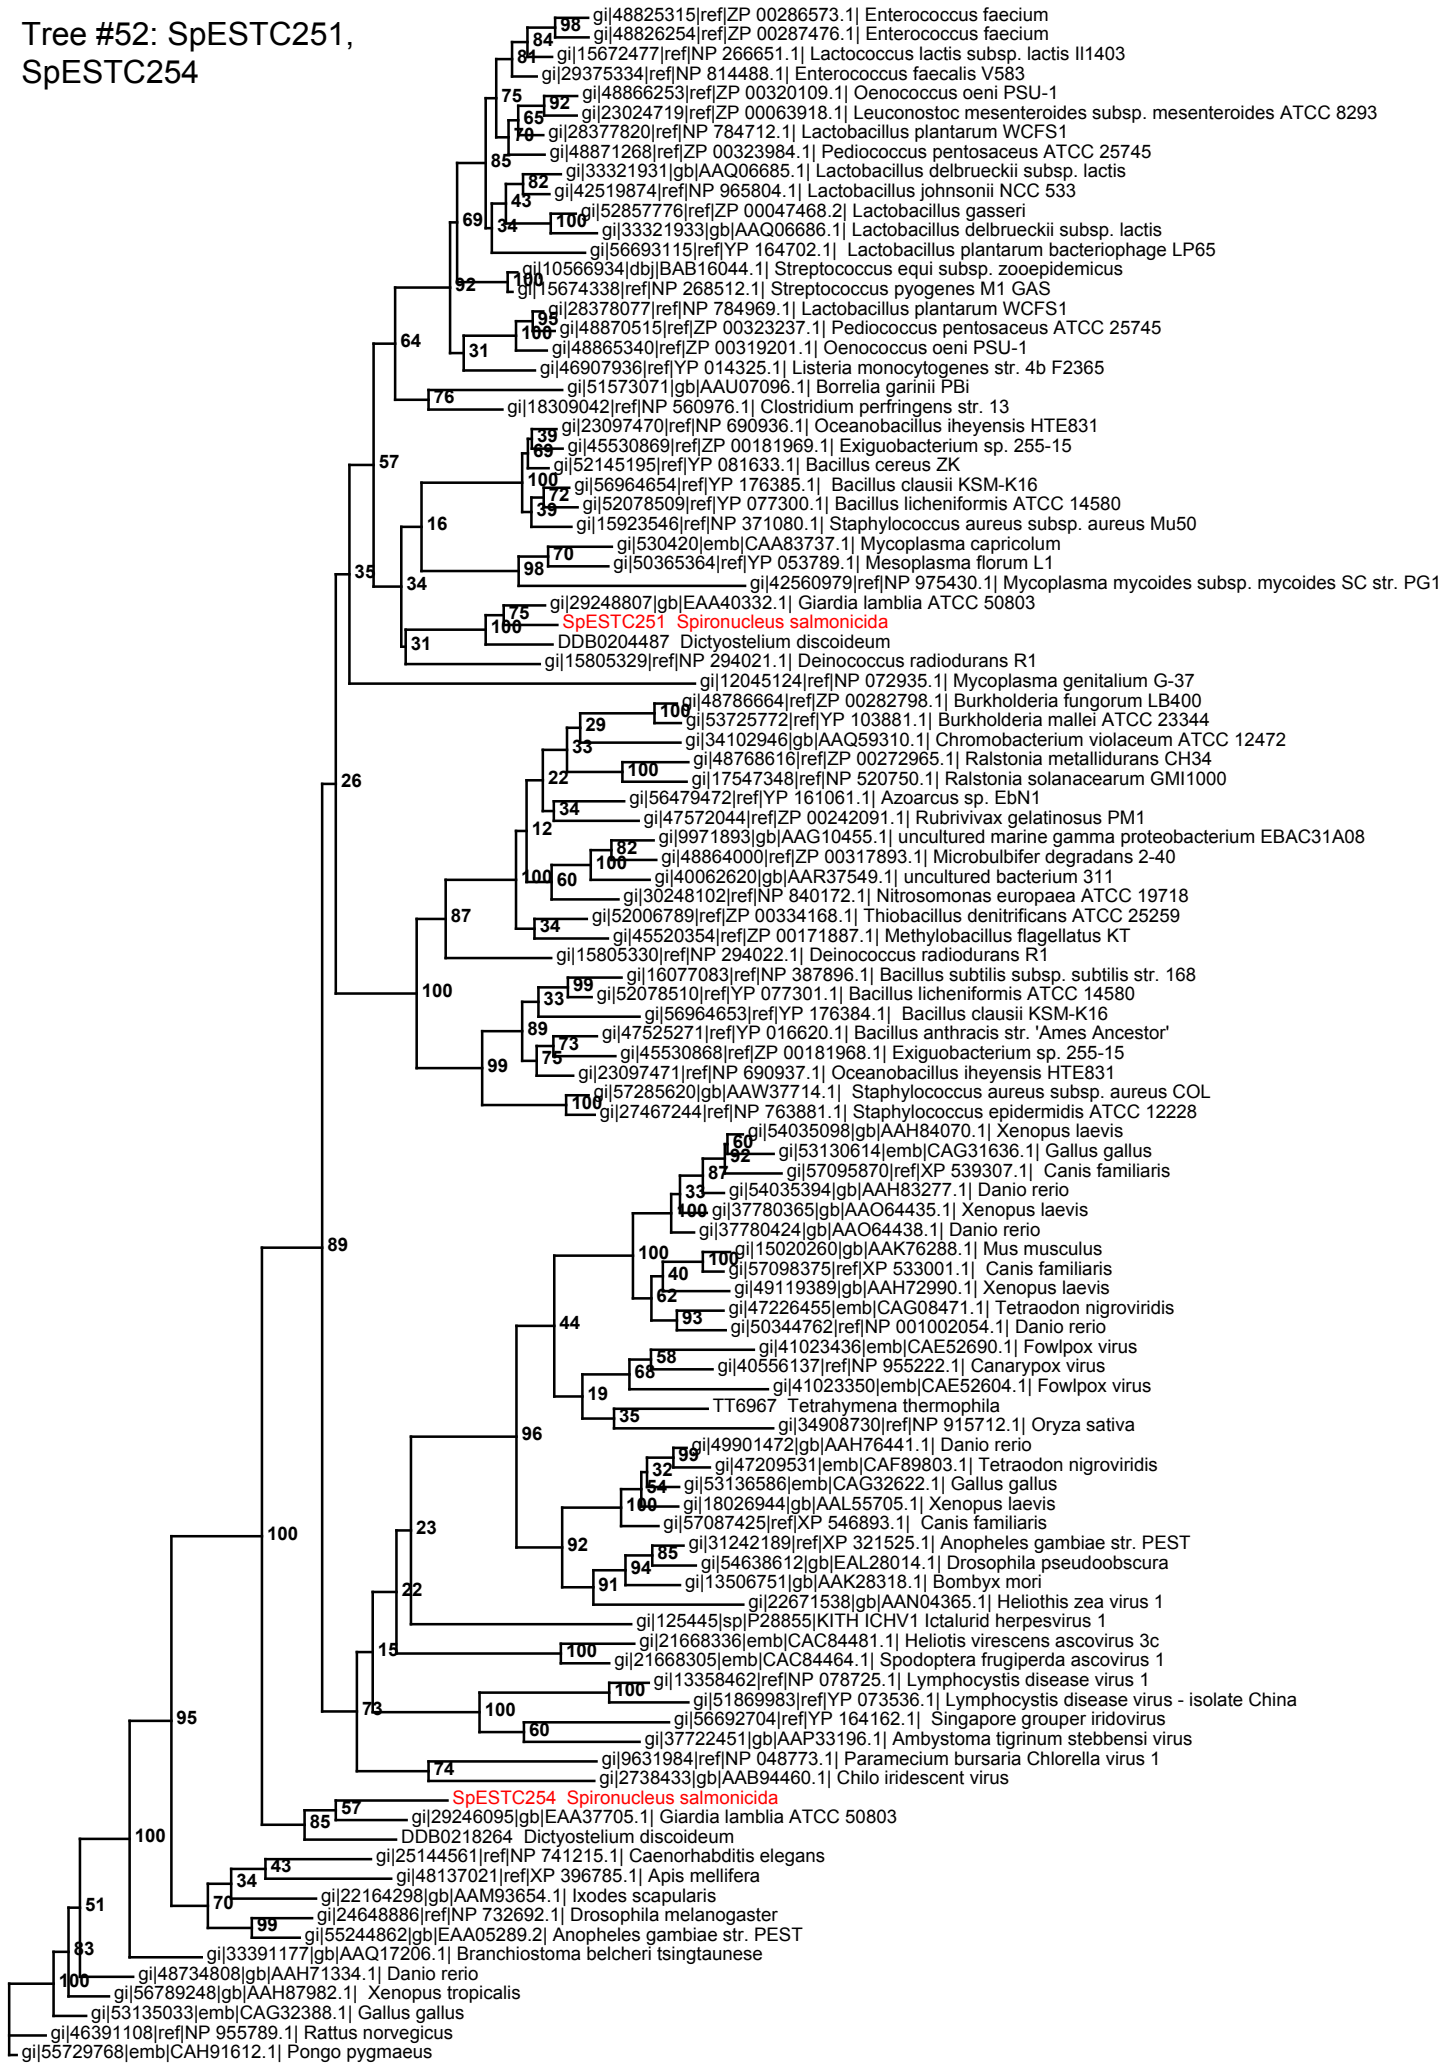

Tree #53: gTor125bT7

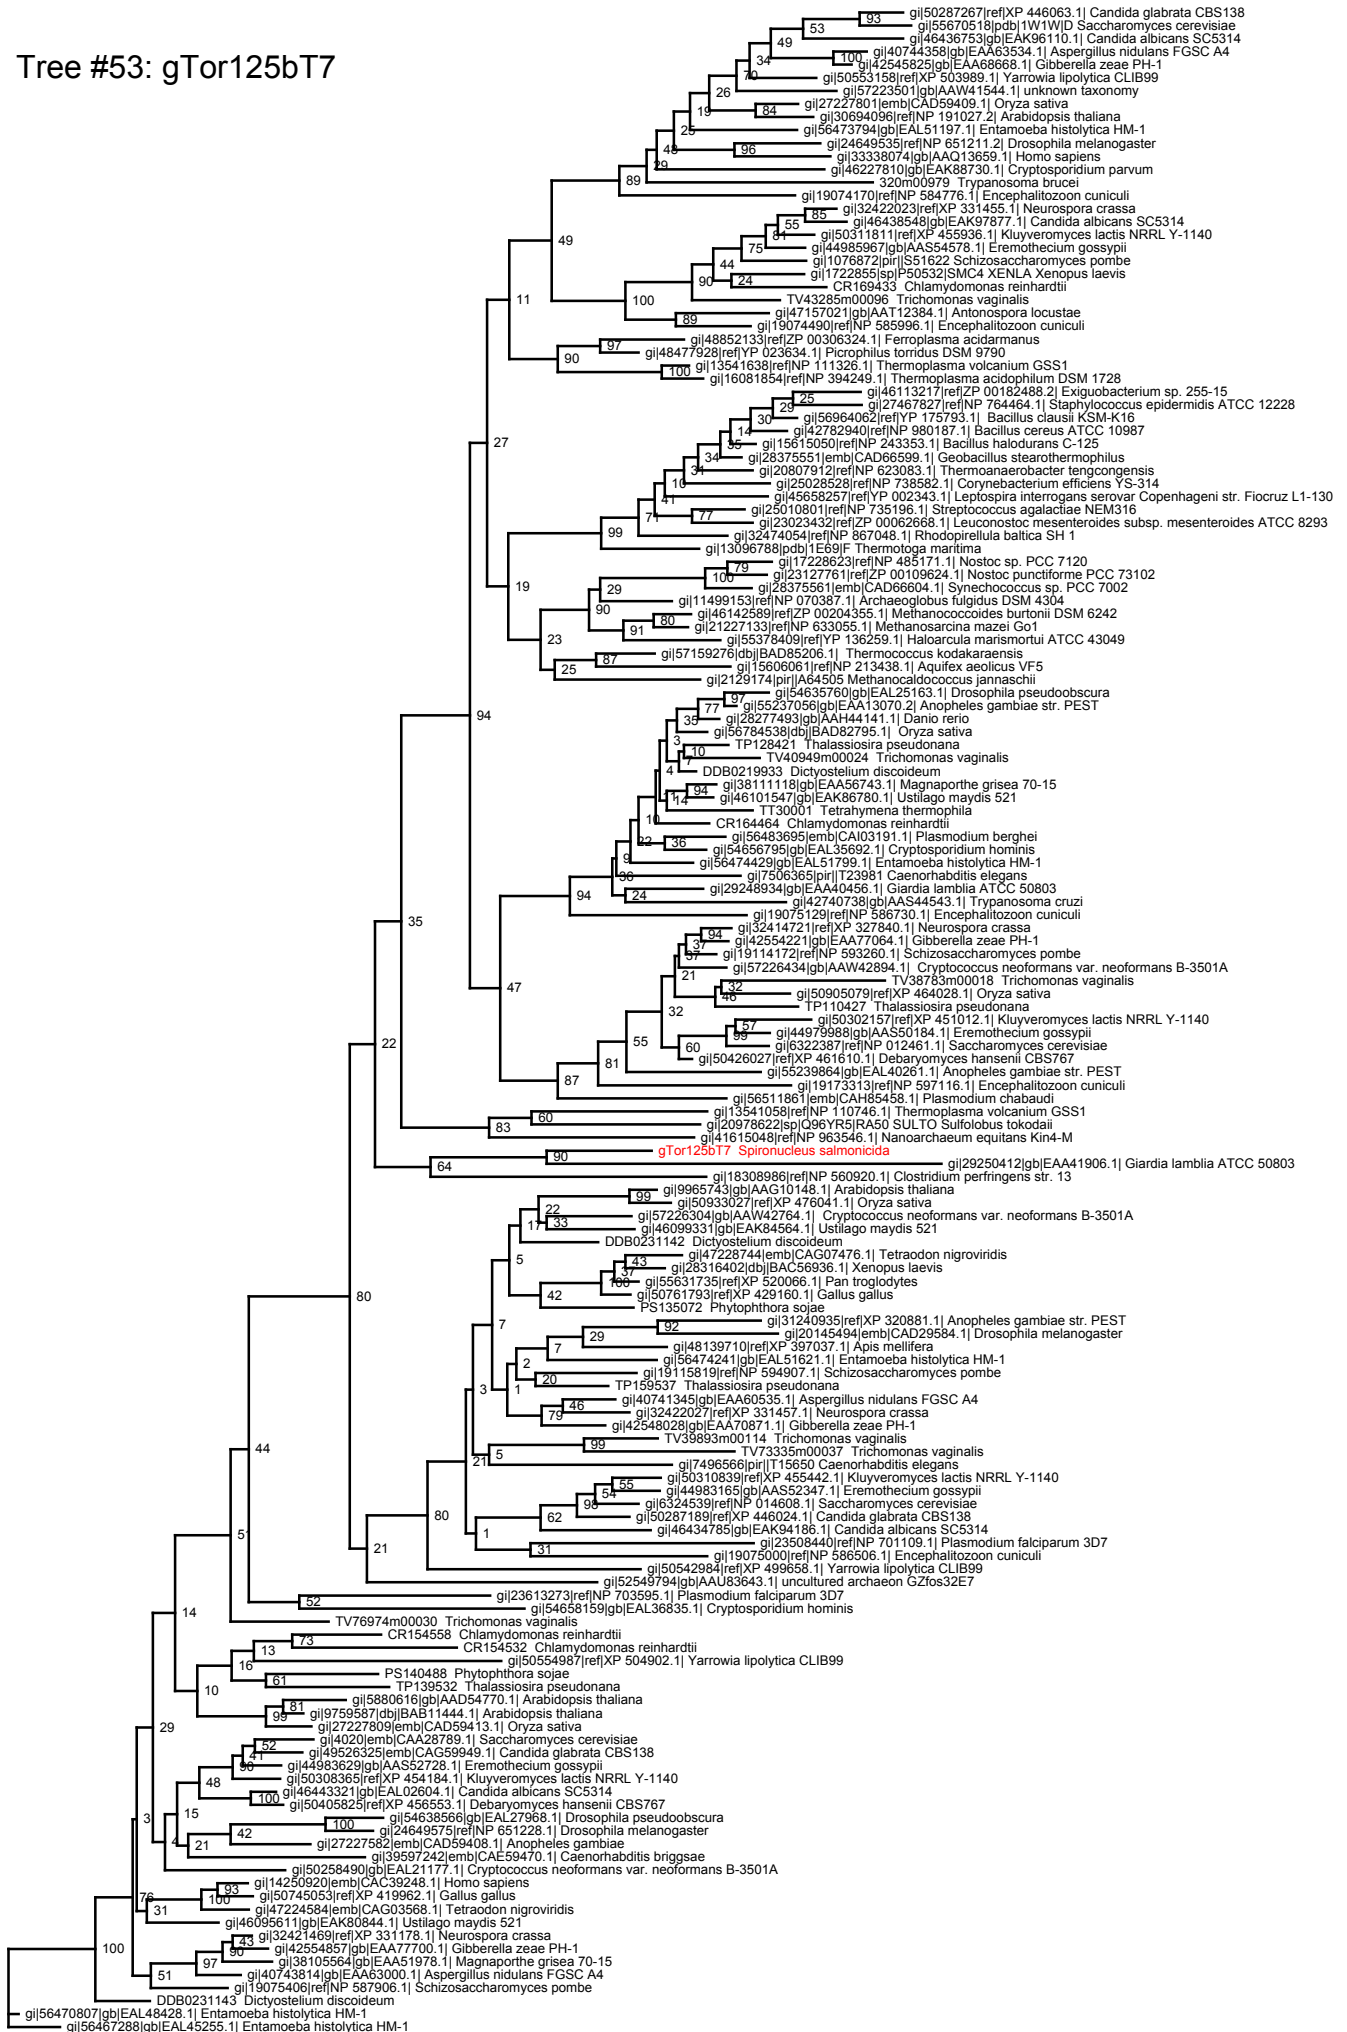



Tree #54: 27982526

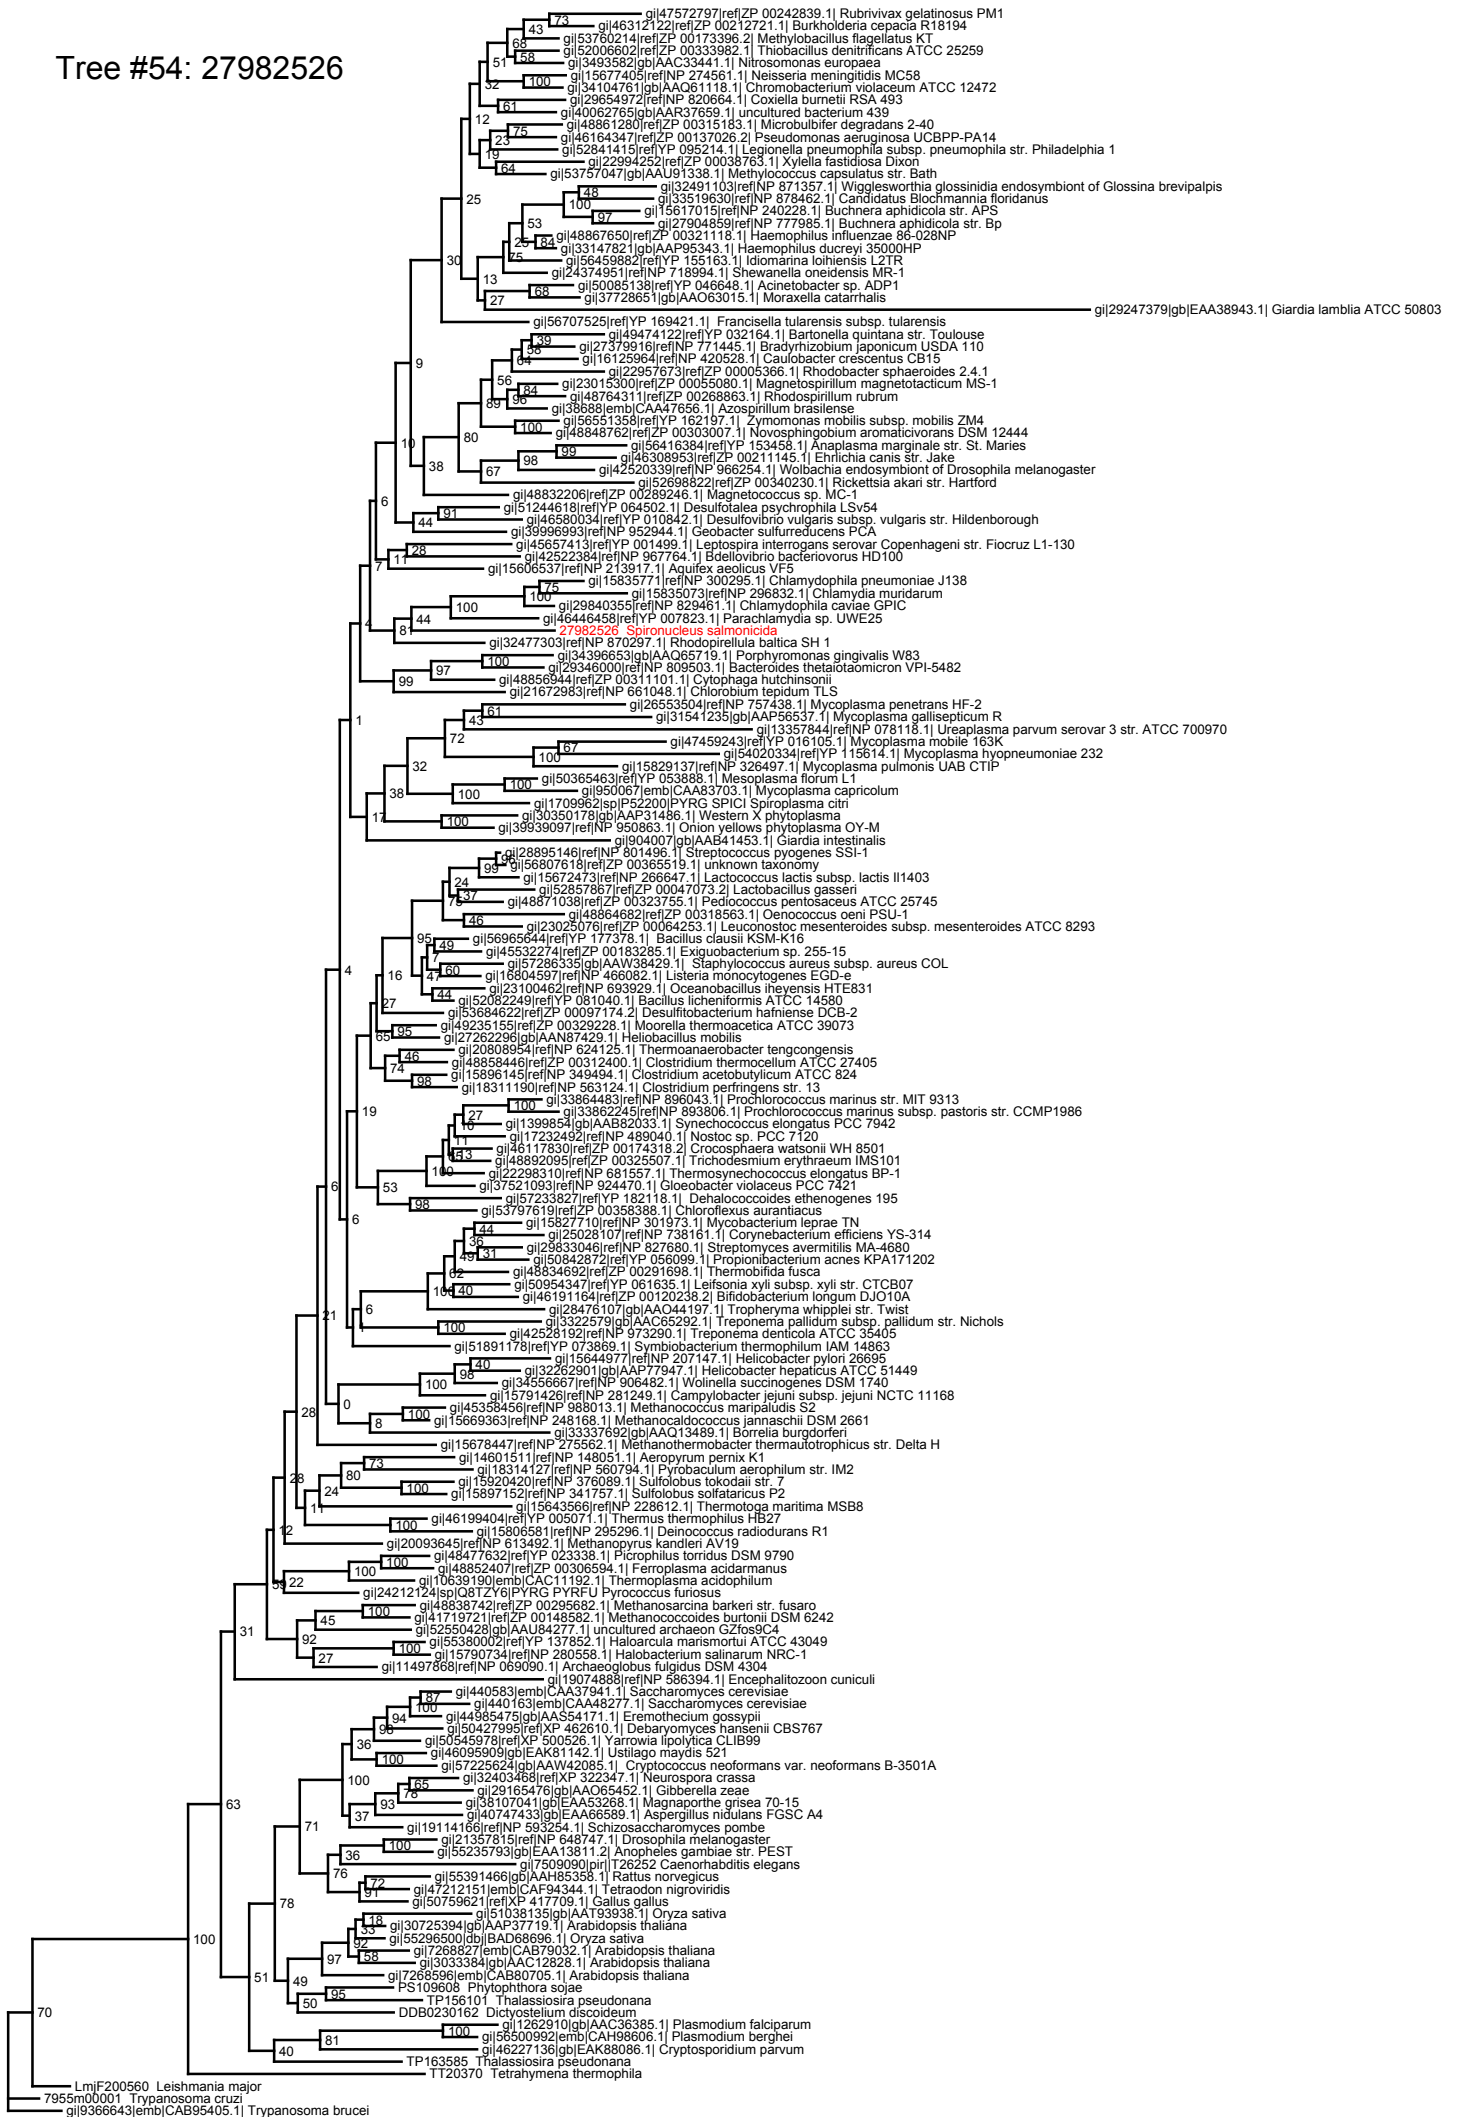

Tree #55: 27984028

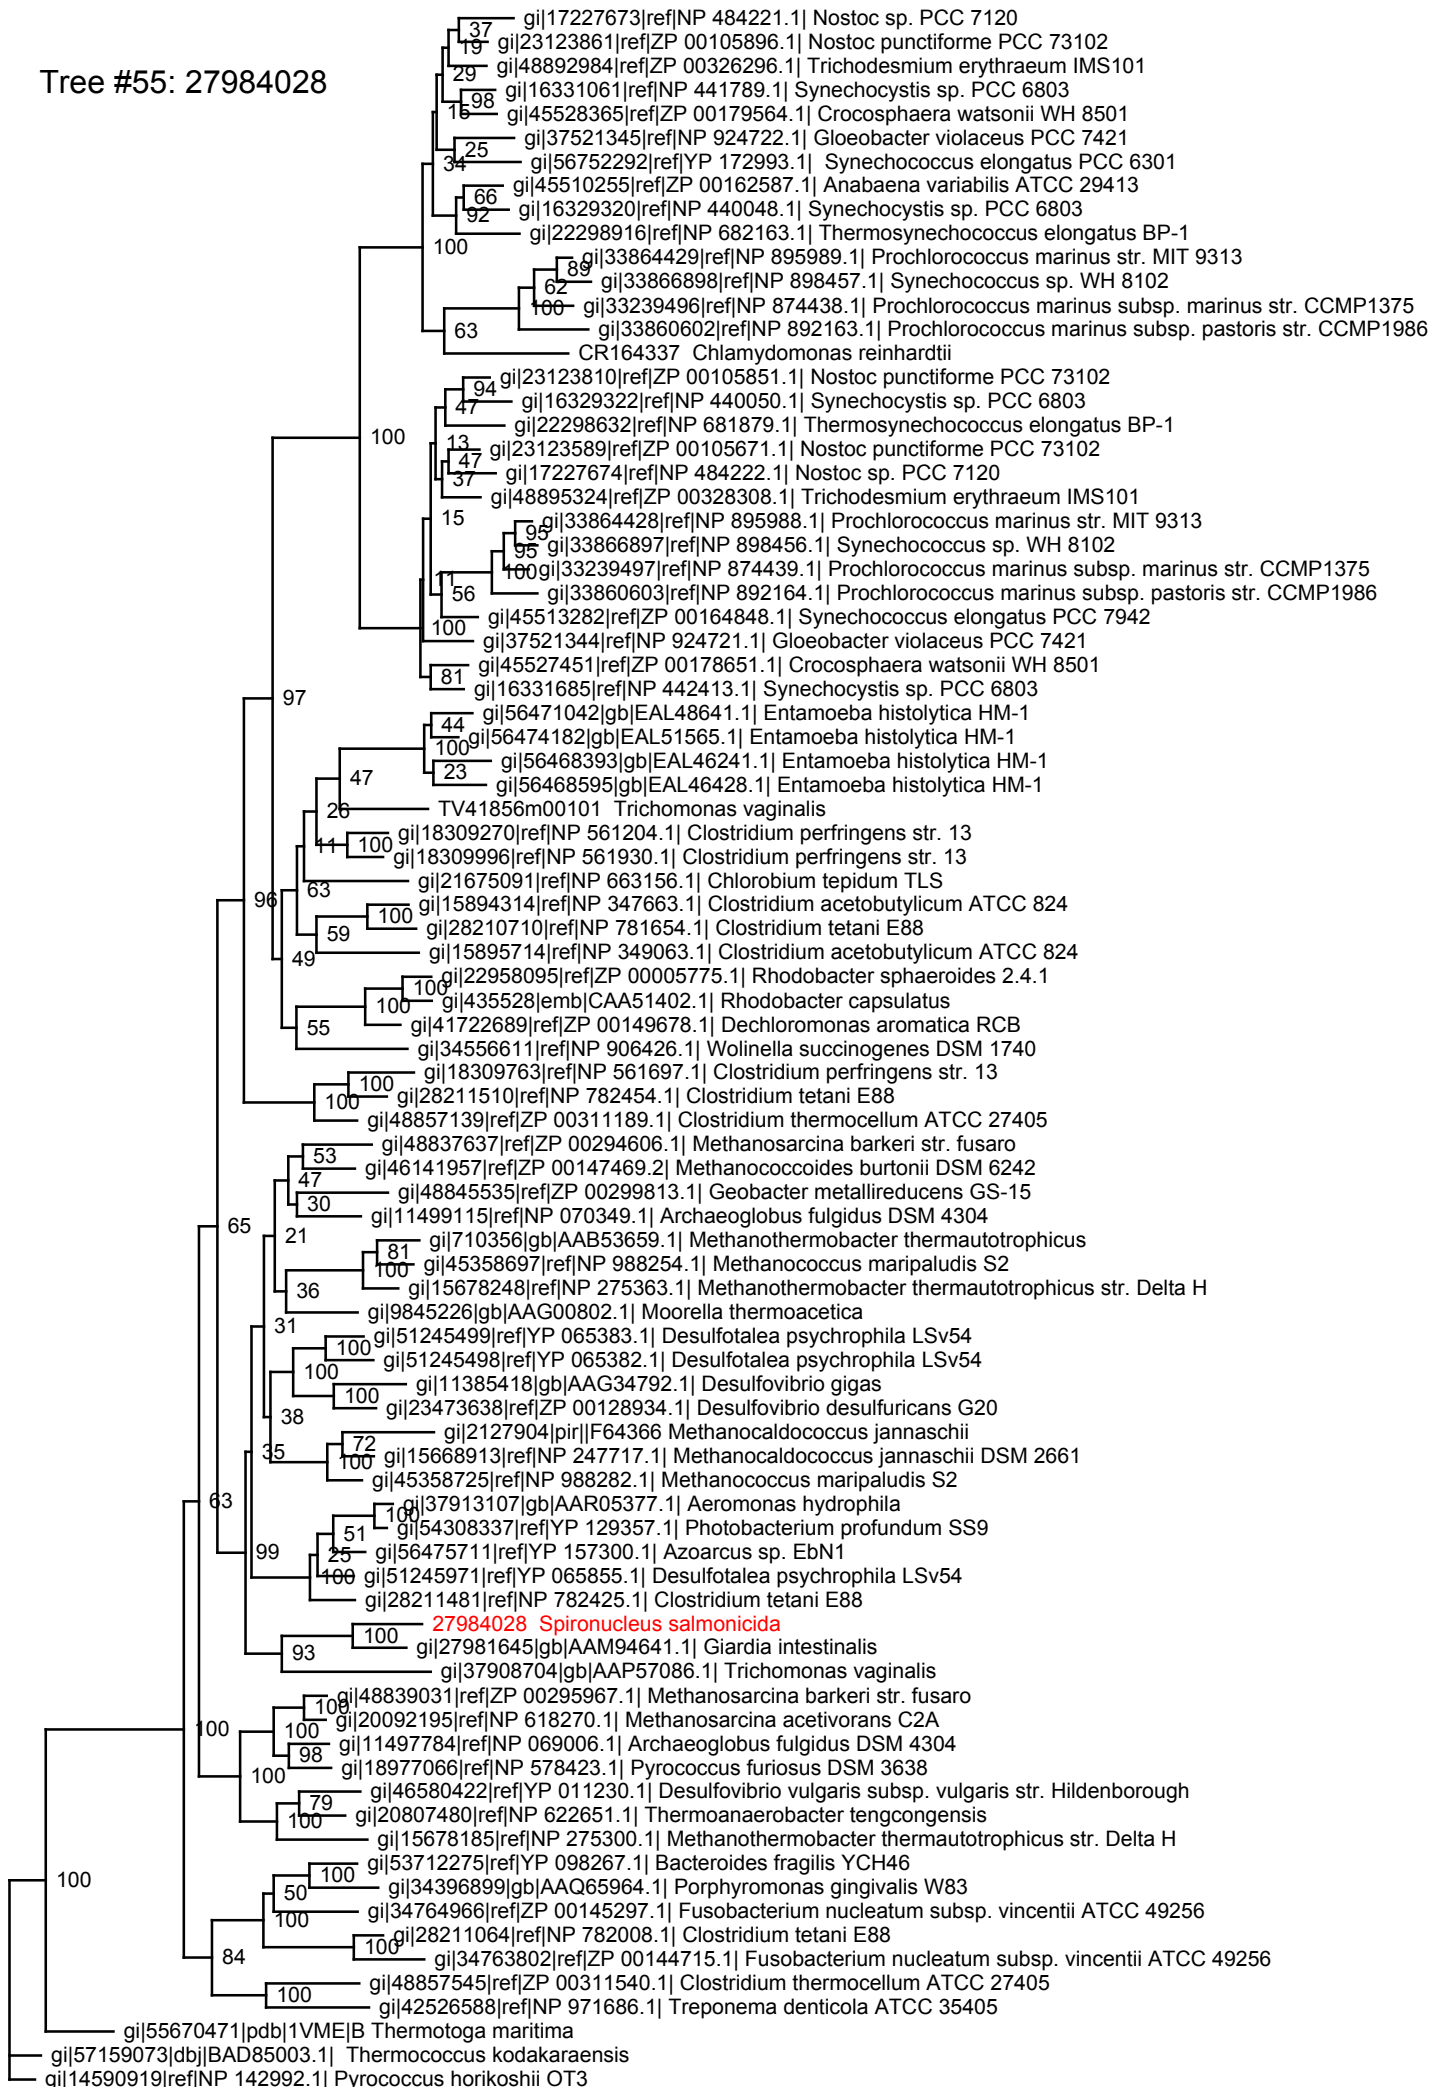

Tree #56: SpESTZap2025

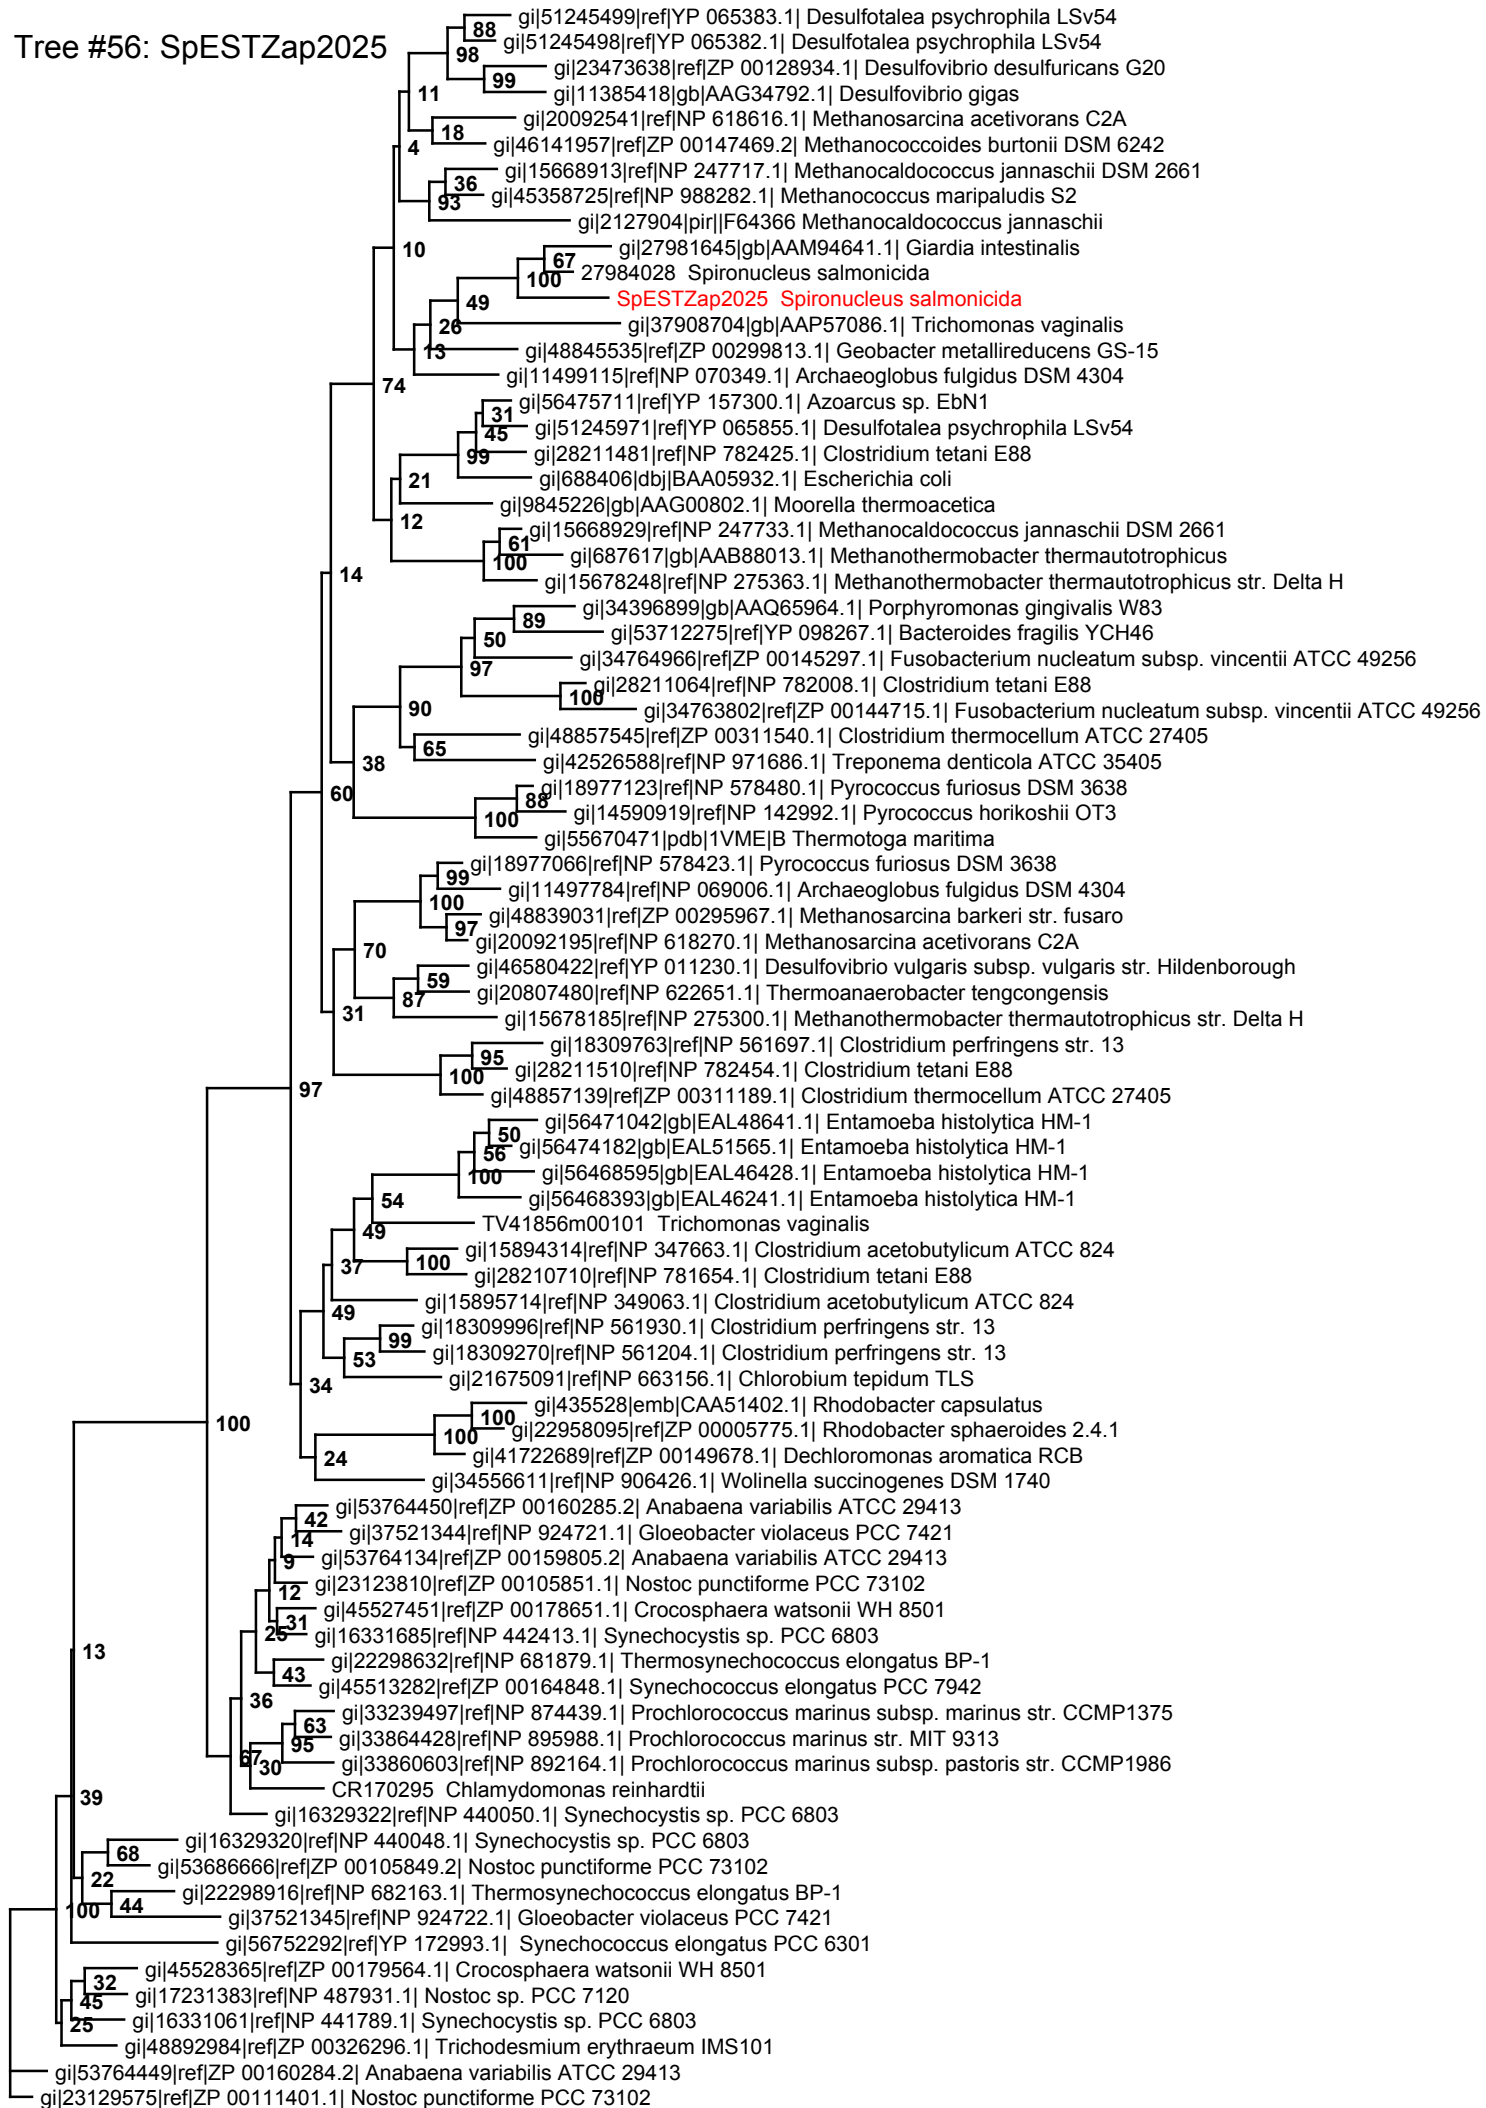

Tree #57: SpESTC196, gZap998gT3

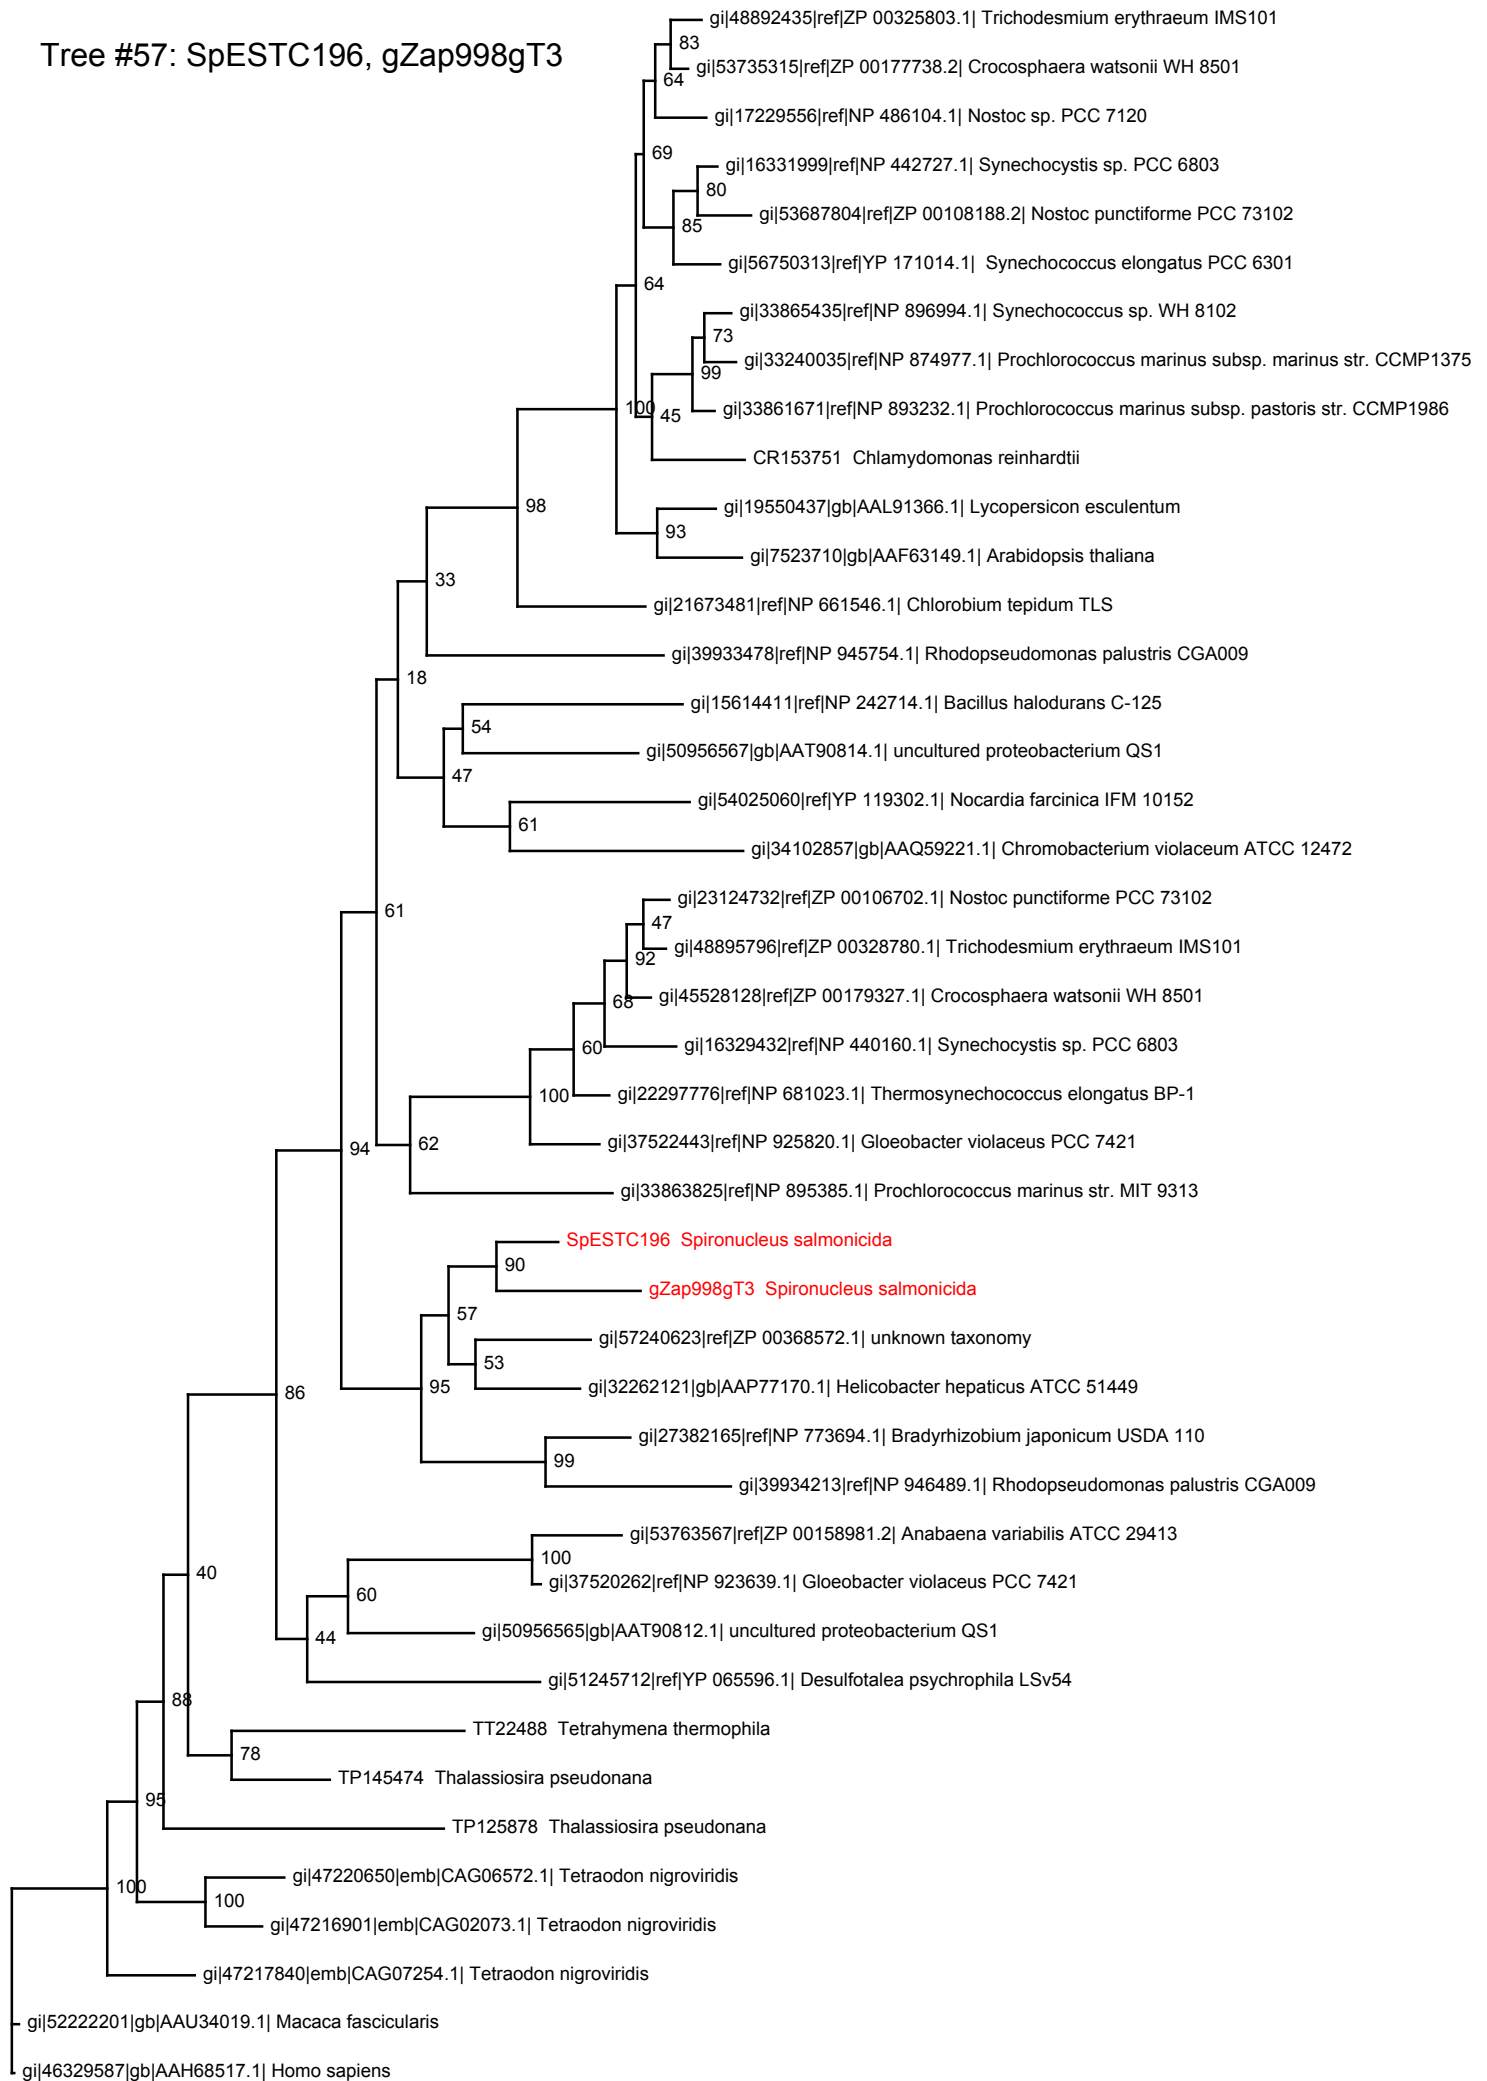



Tree #58: SpESTC267, SpESTC282

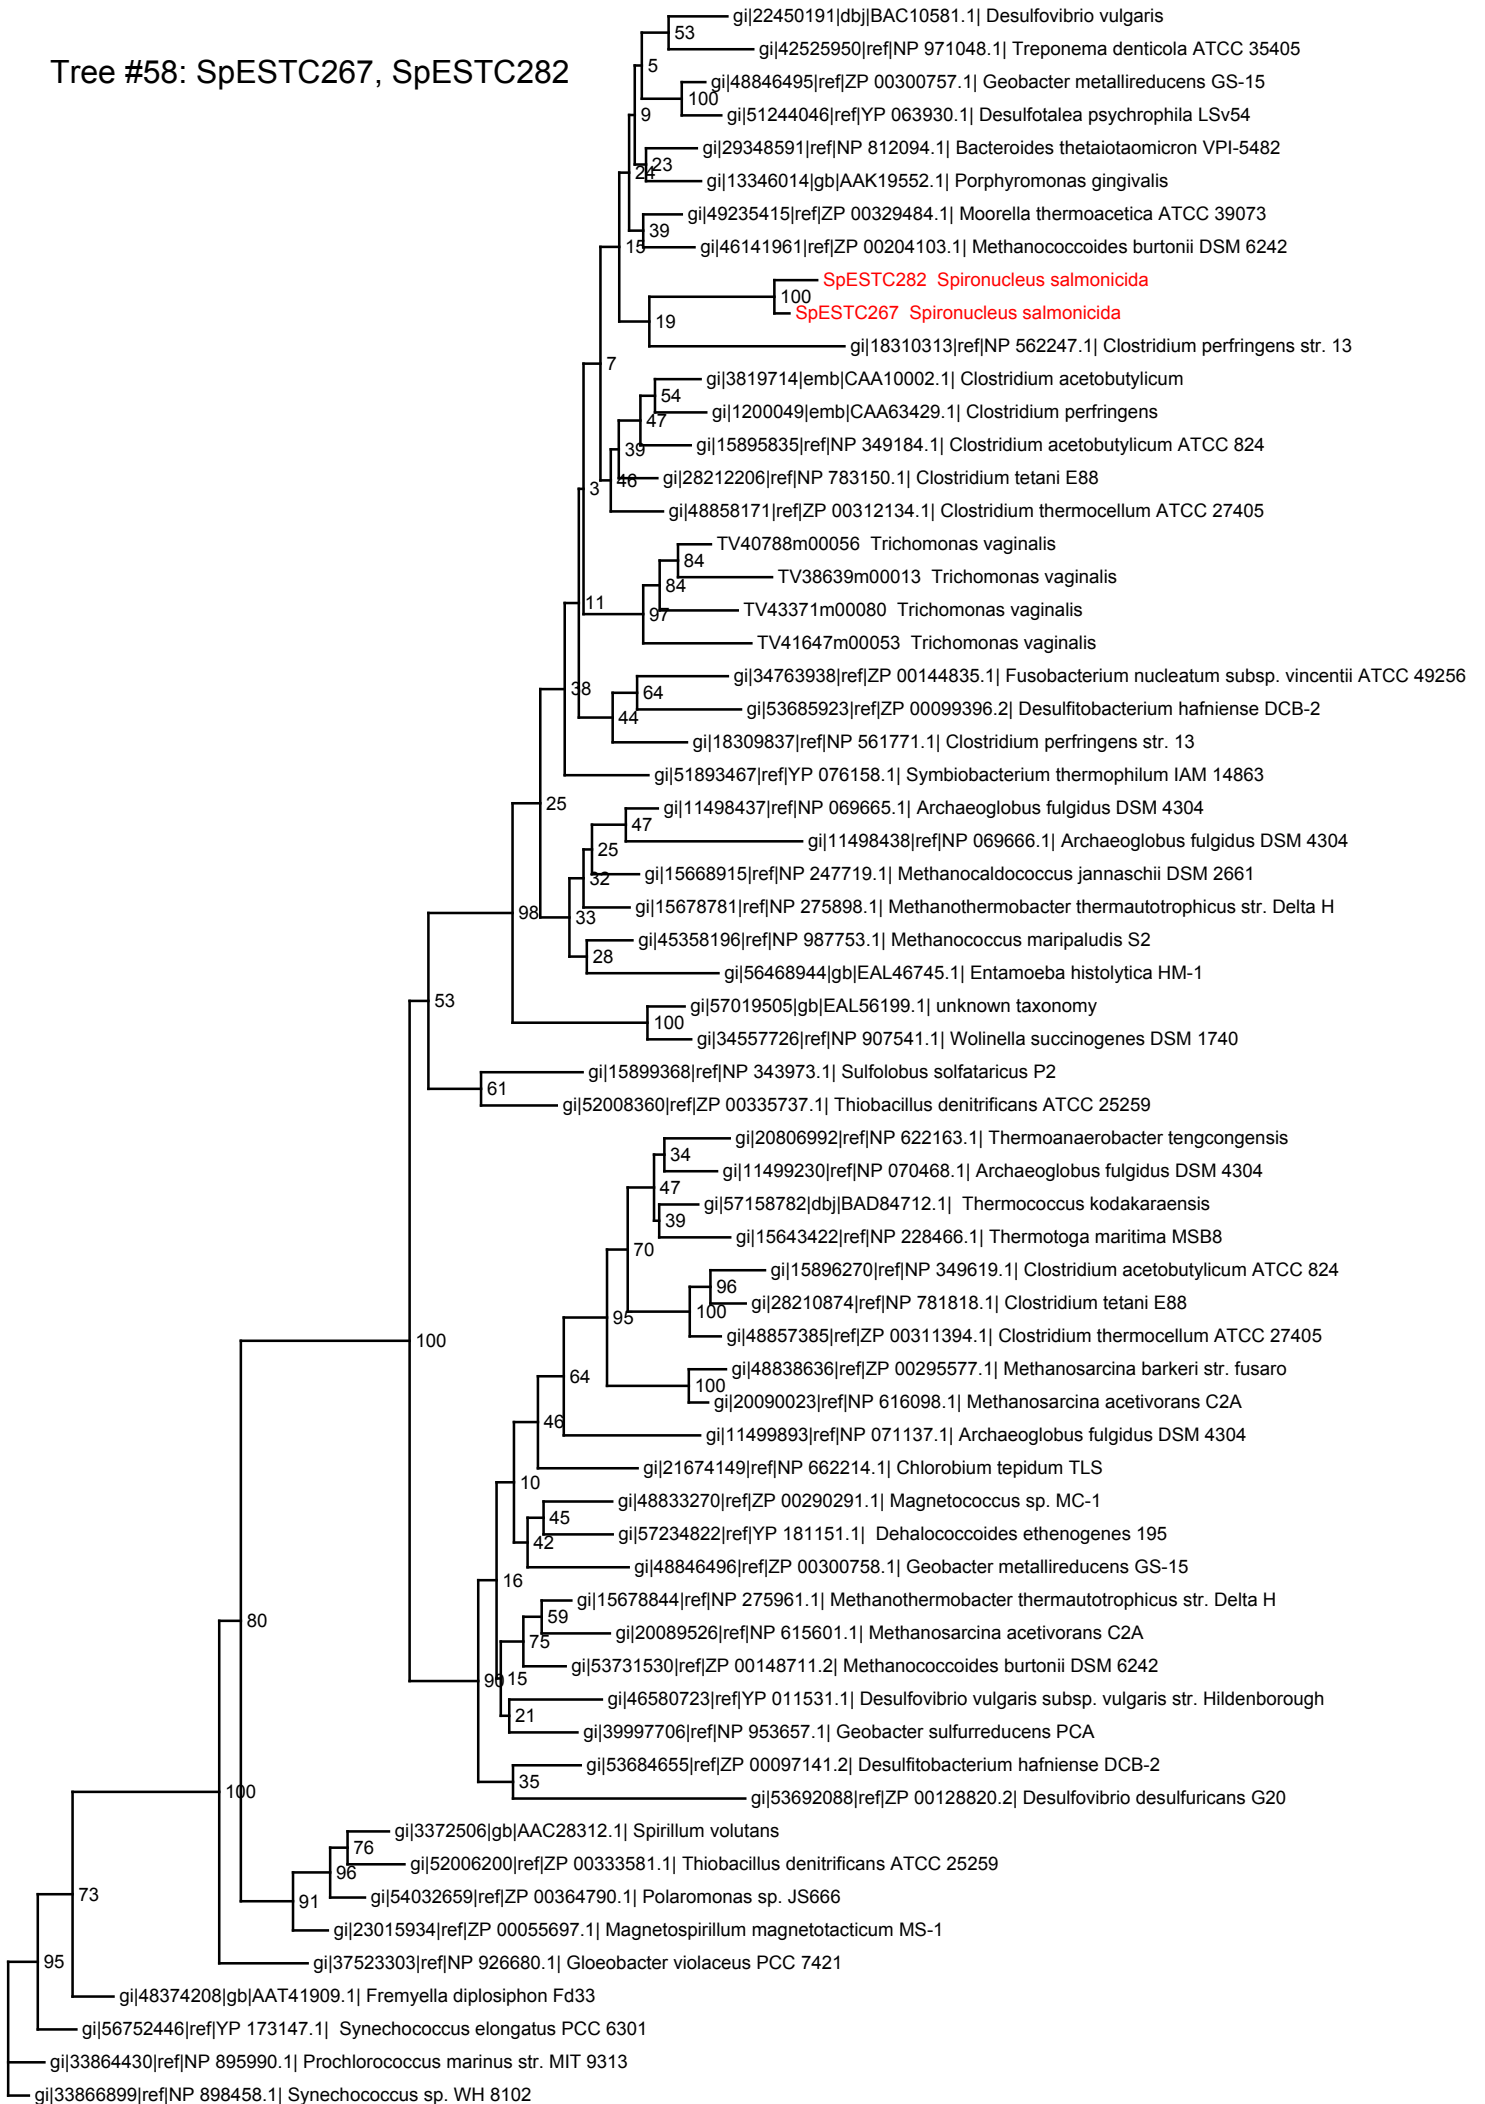



Tree #59: gTor1213bT7

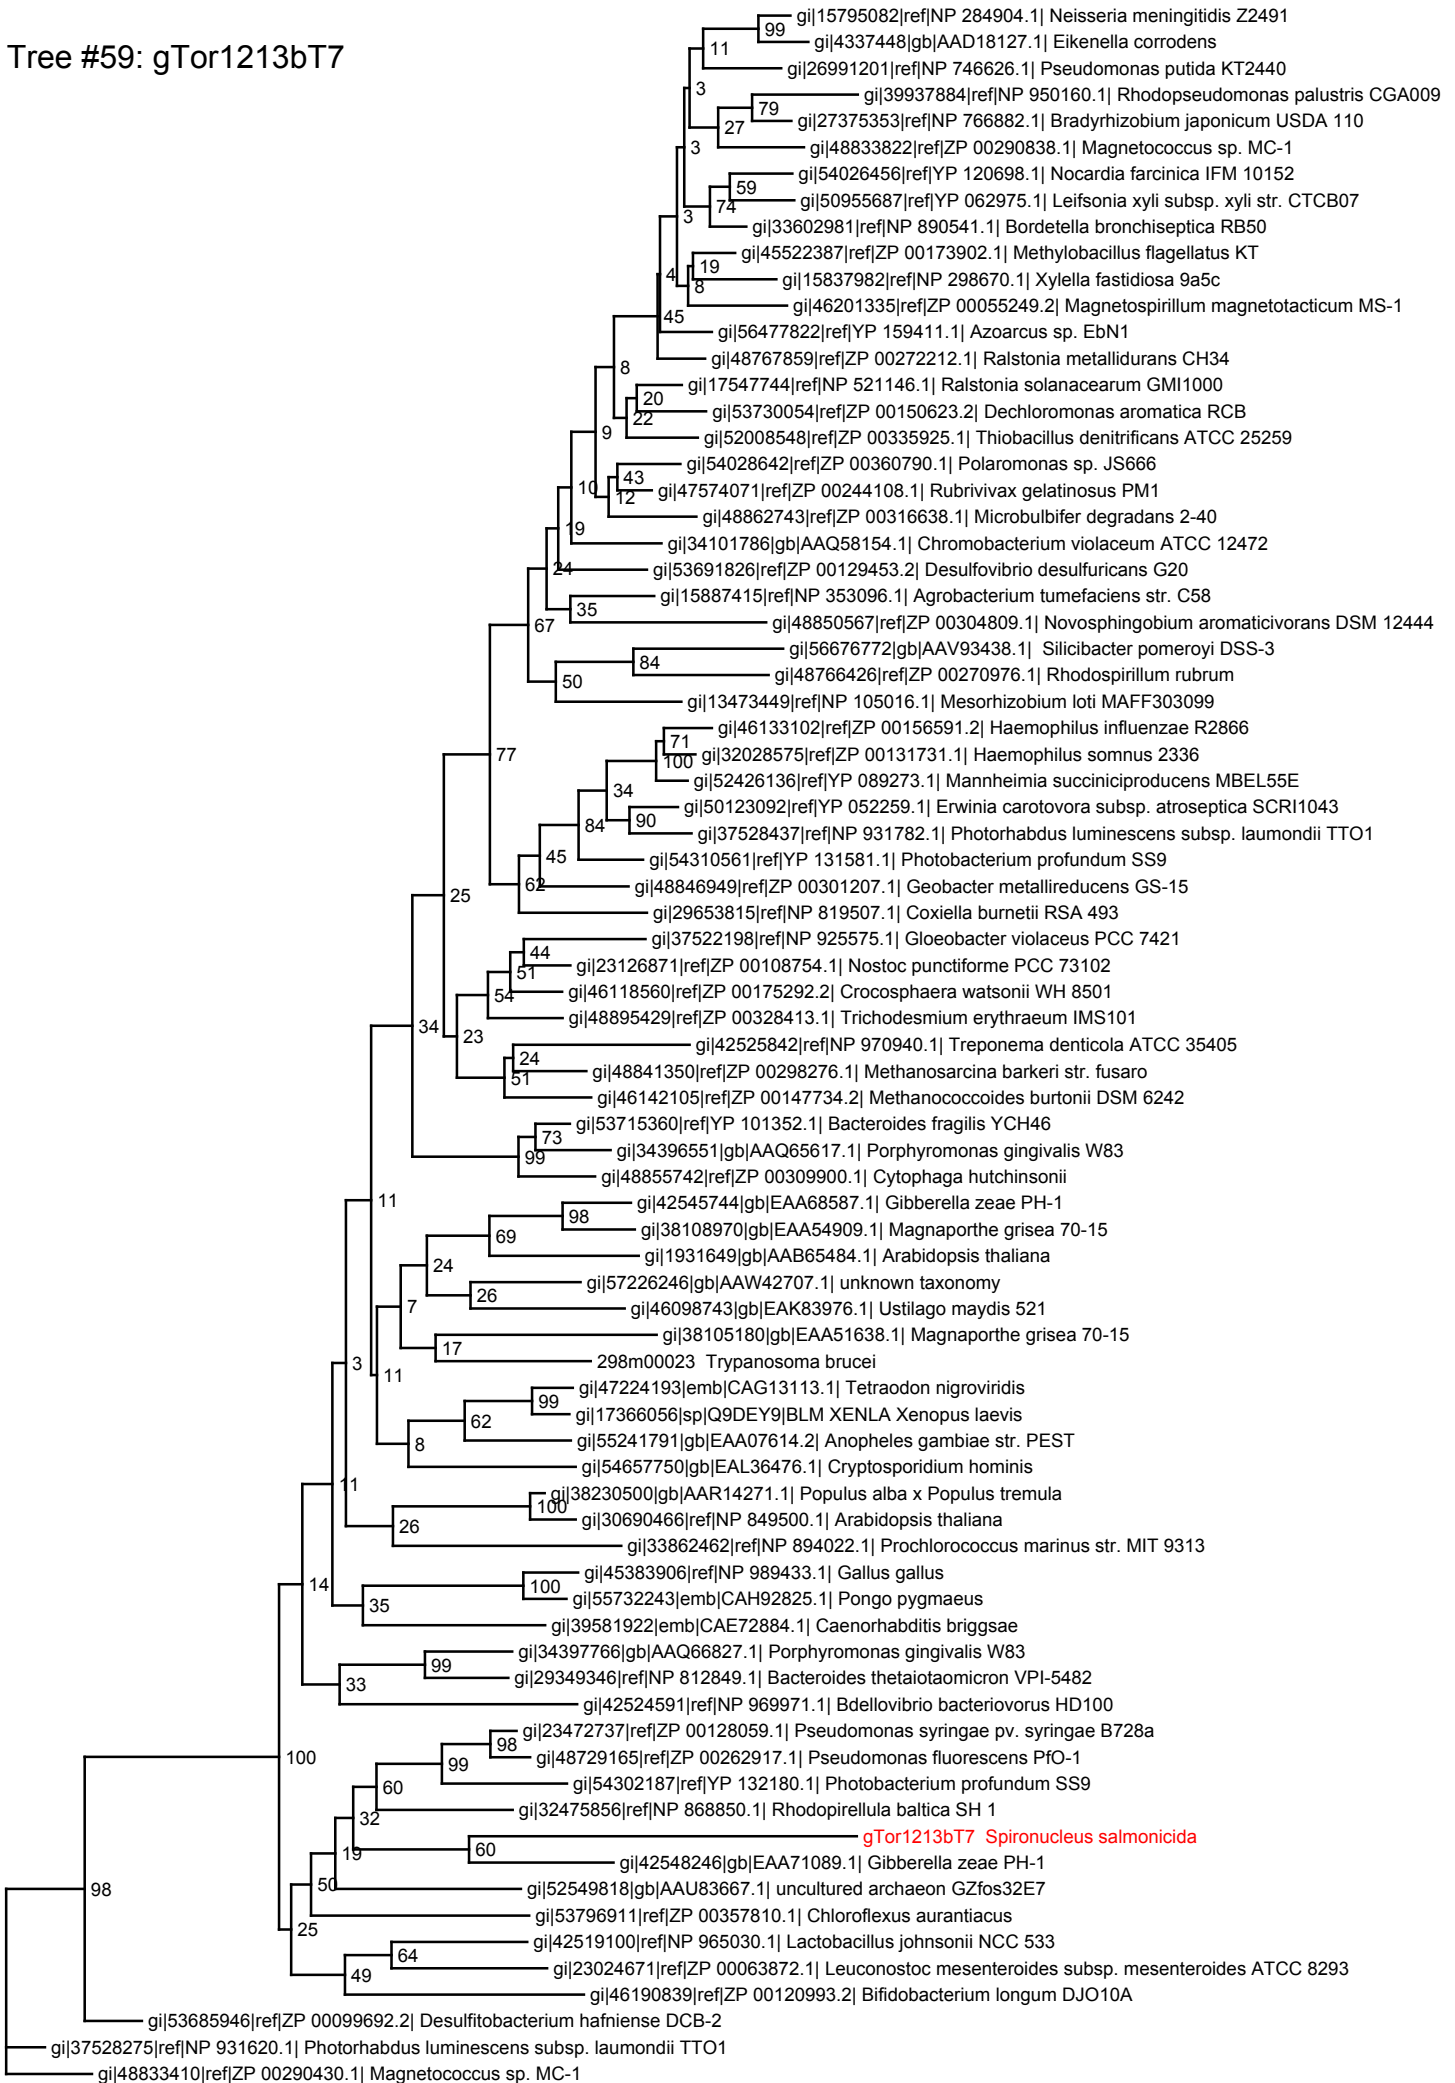

Tree #60: gTor541gT3

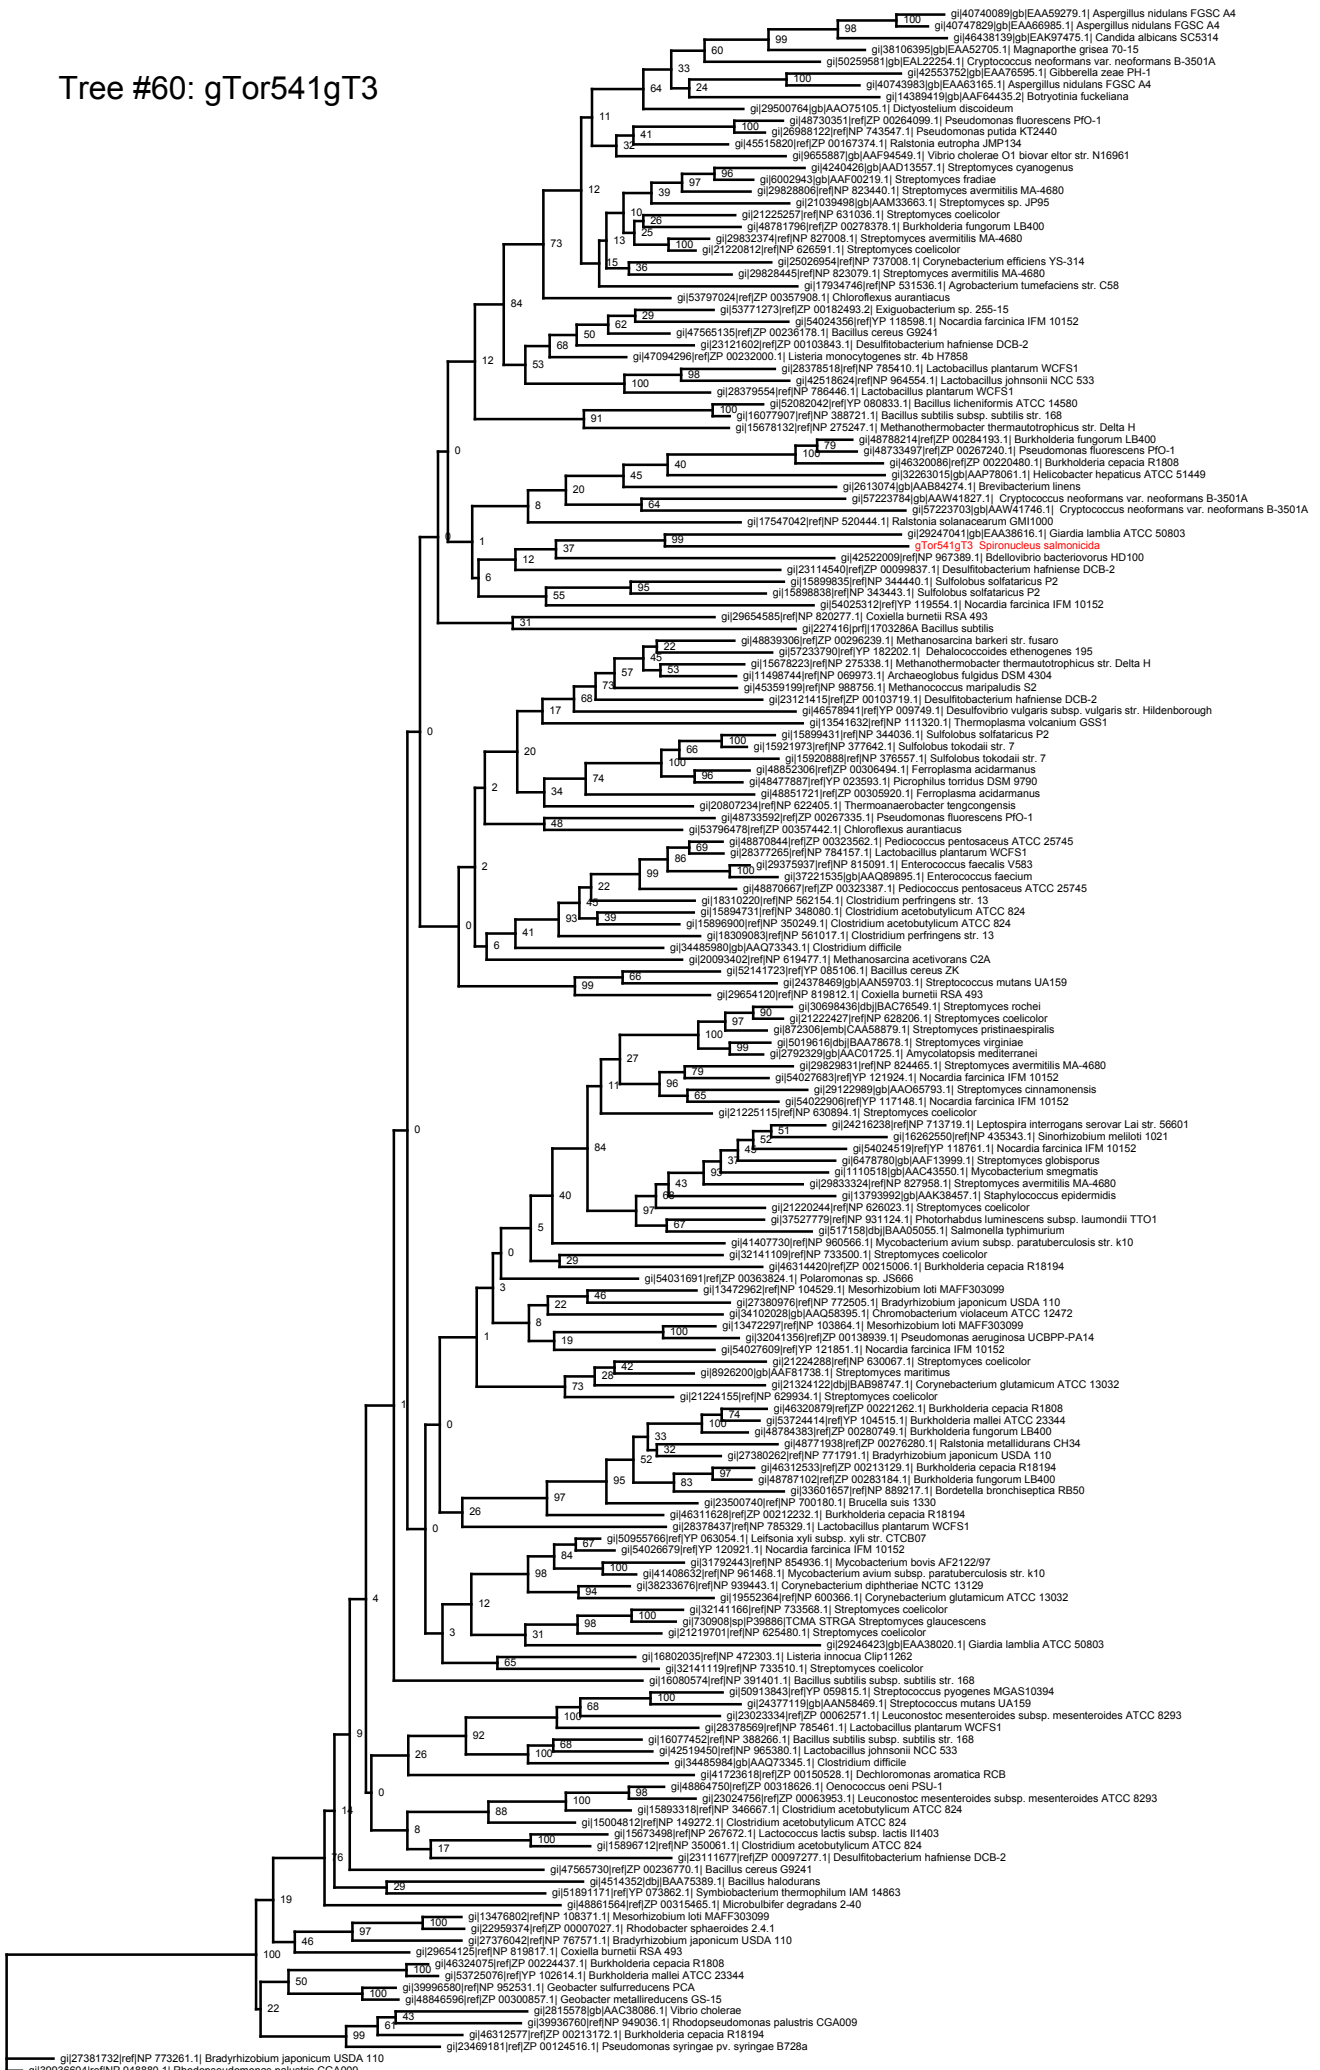

Tree #61: gTor565bT7

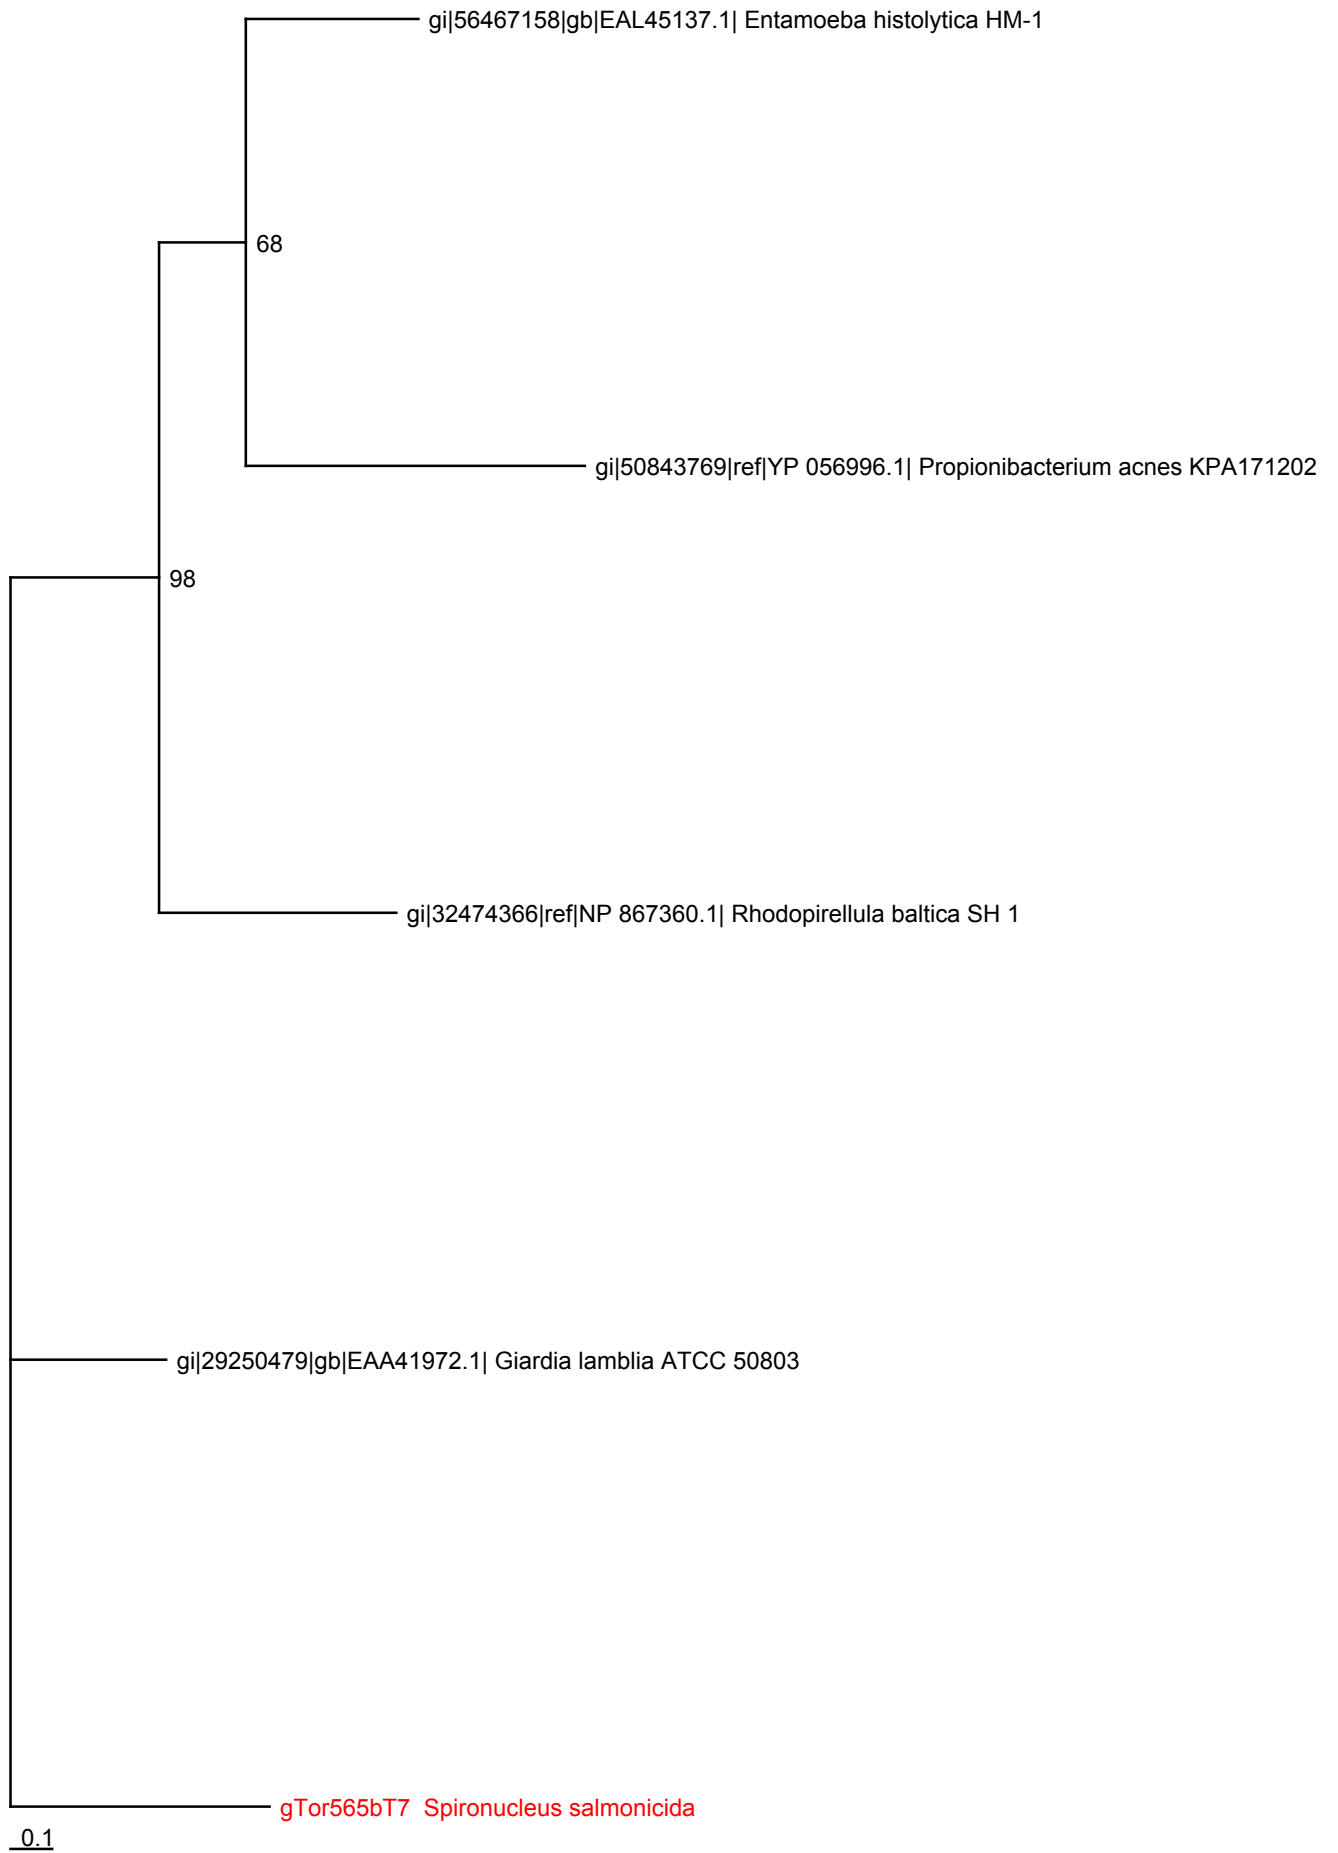

Tree #62: gTor916gT3

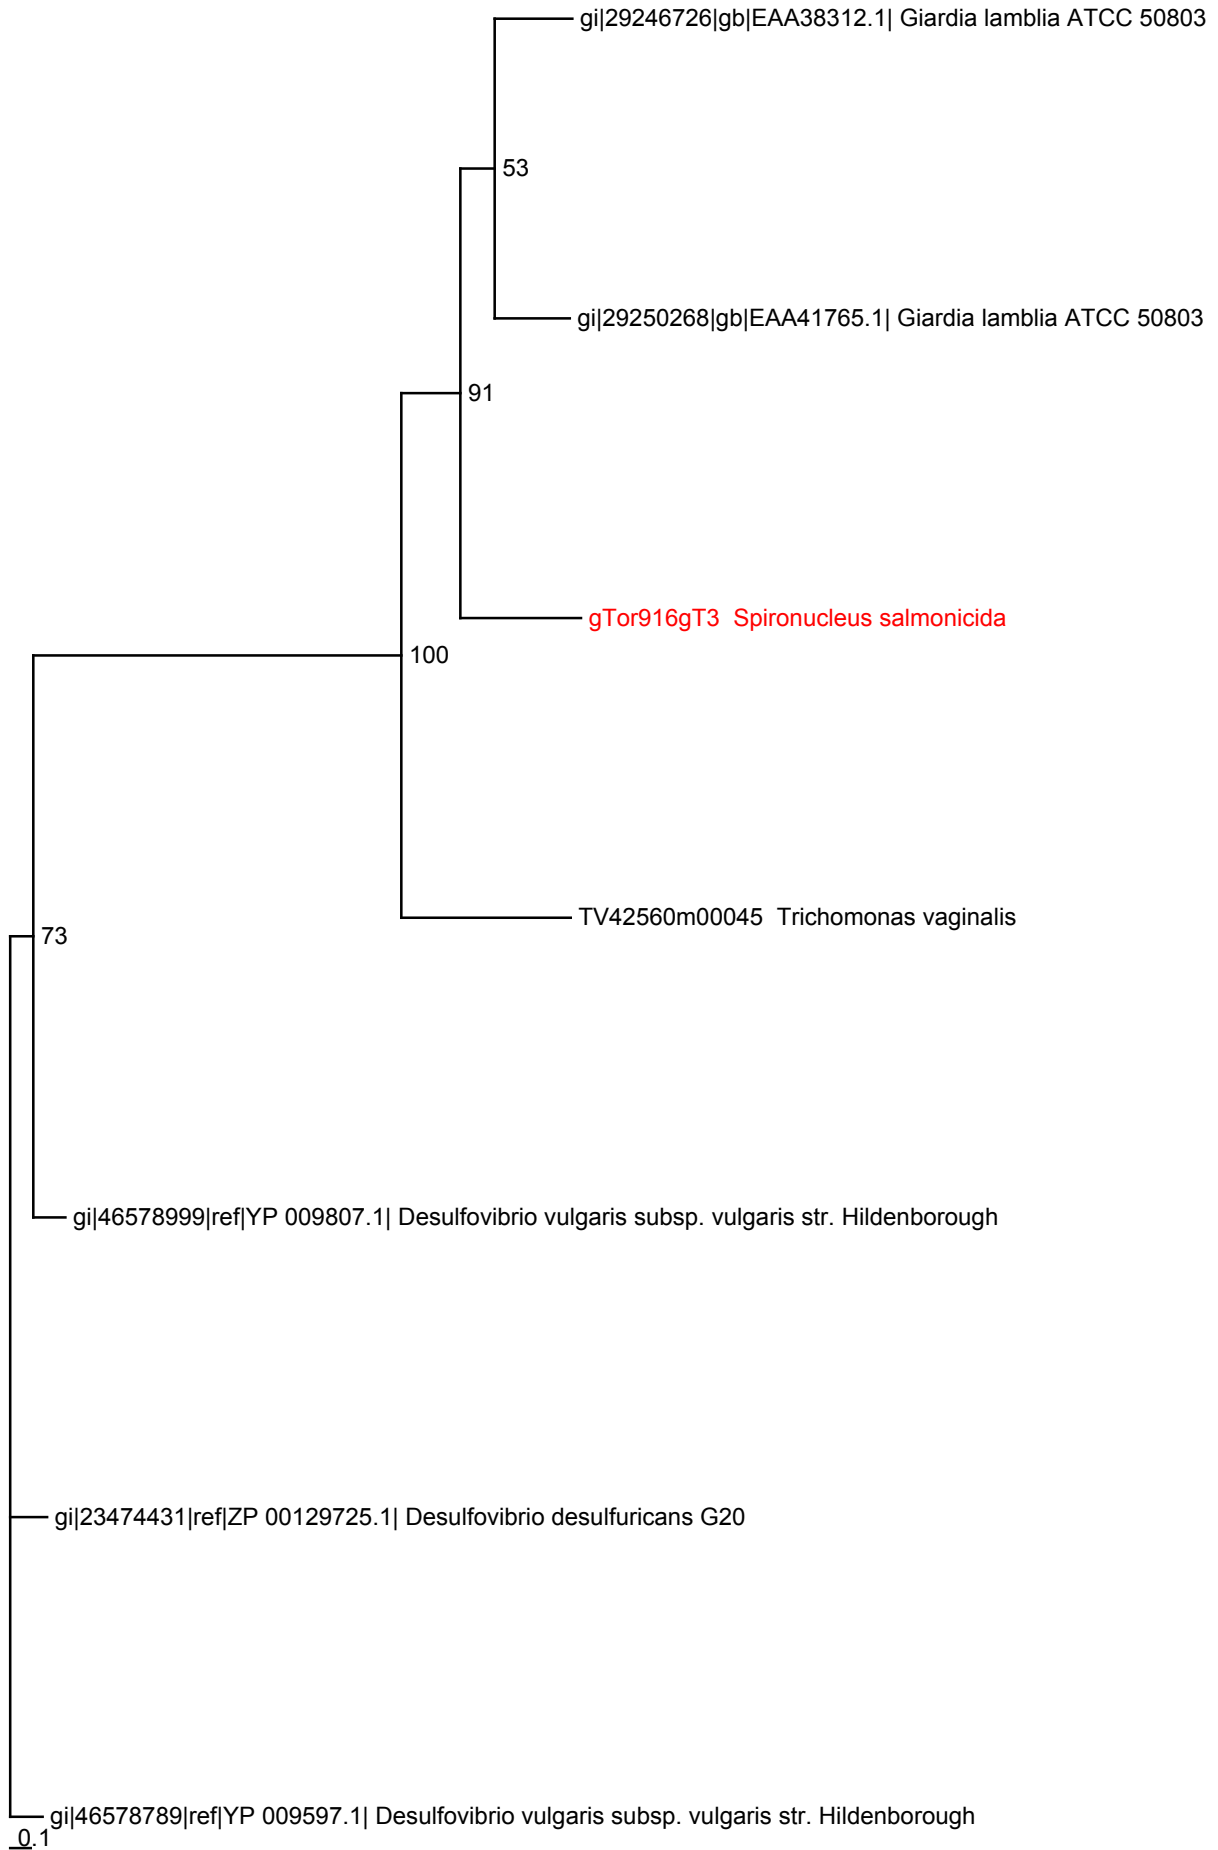



Tree #63: gTor930bT7

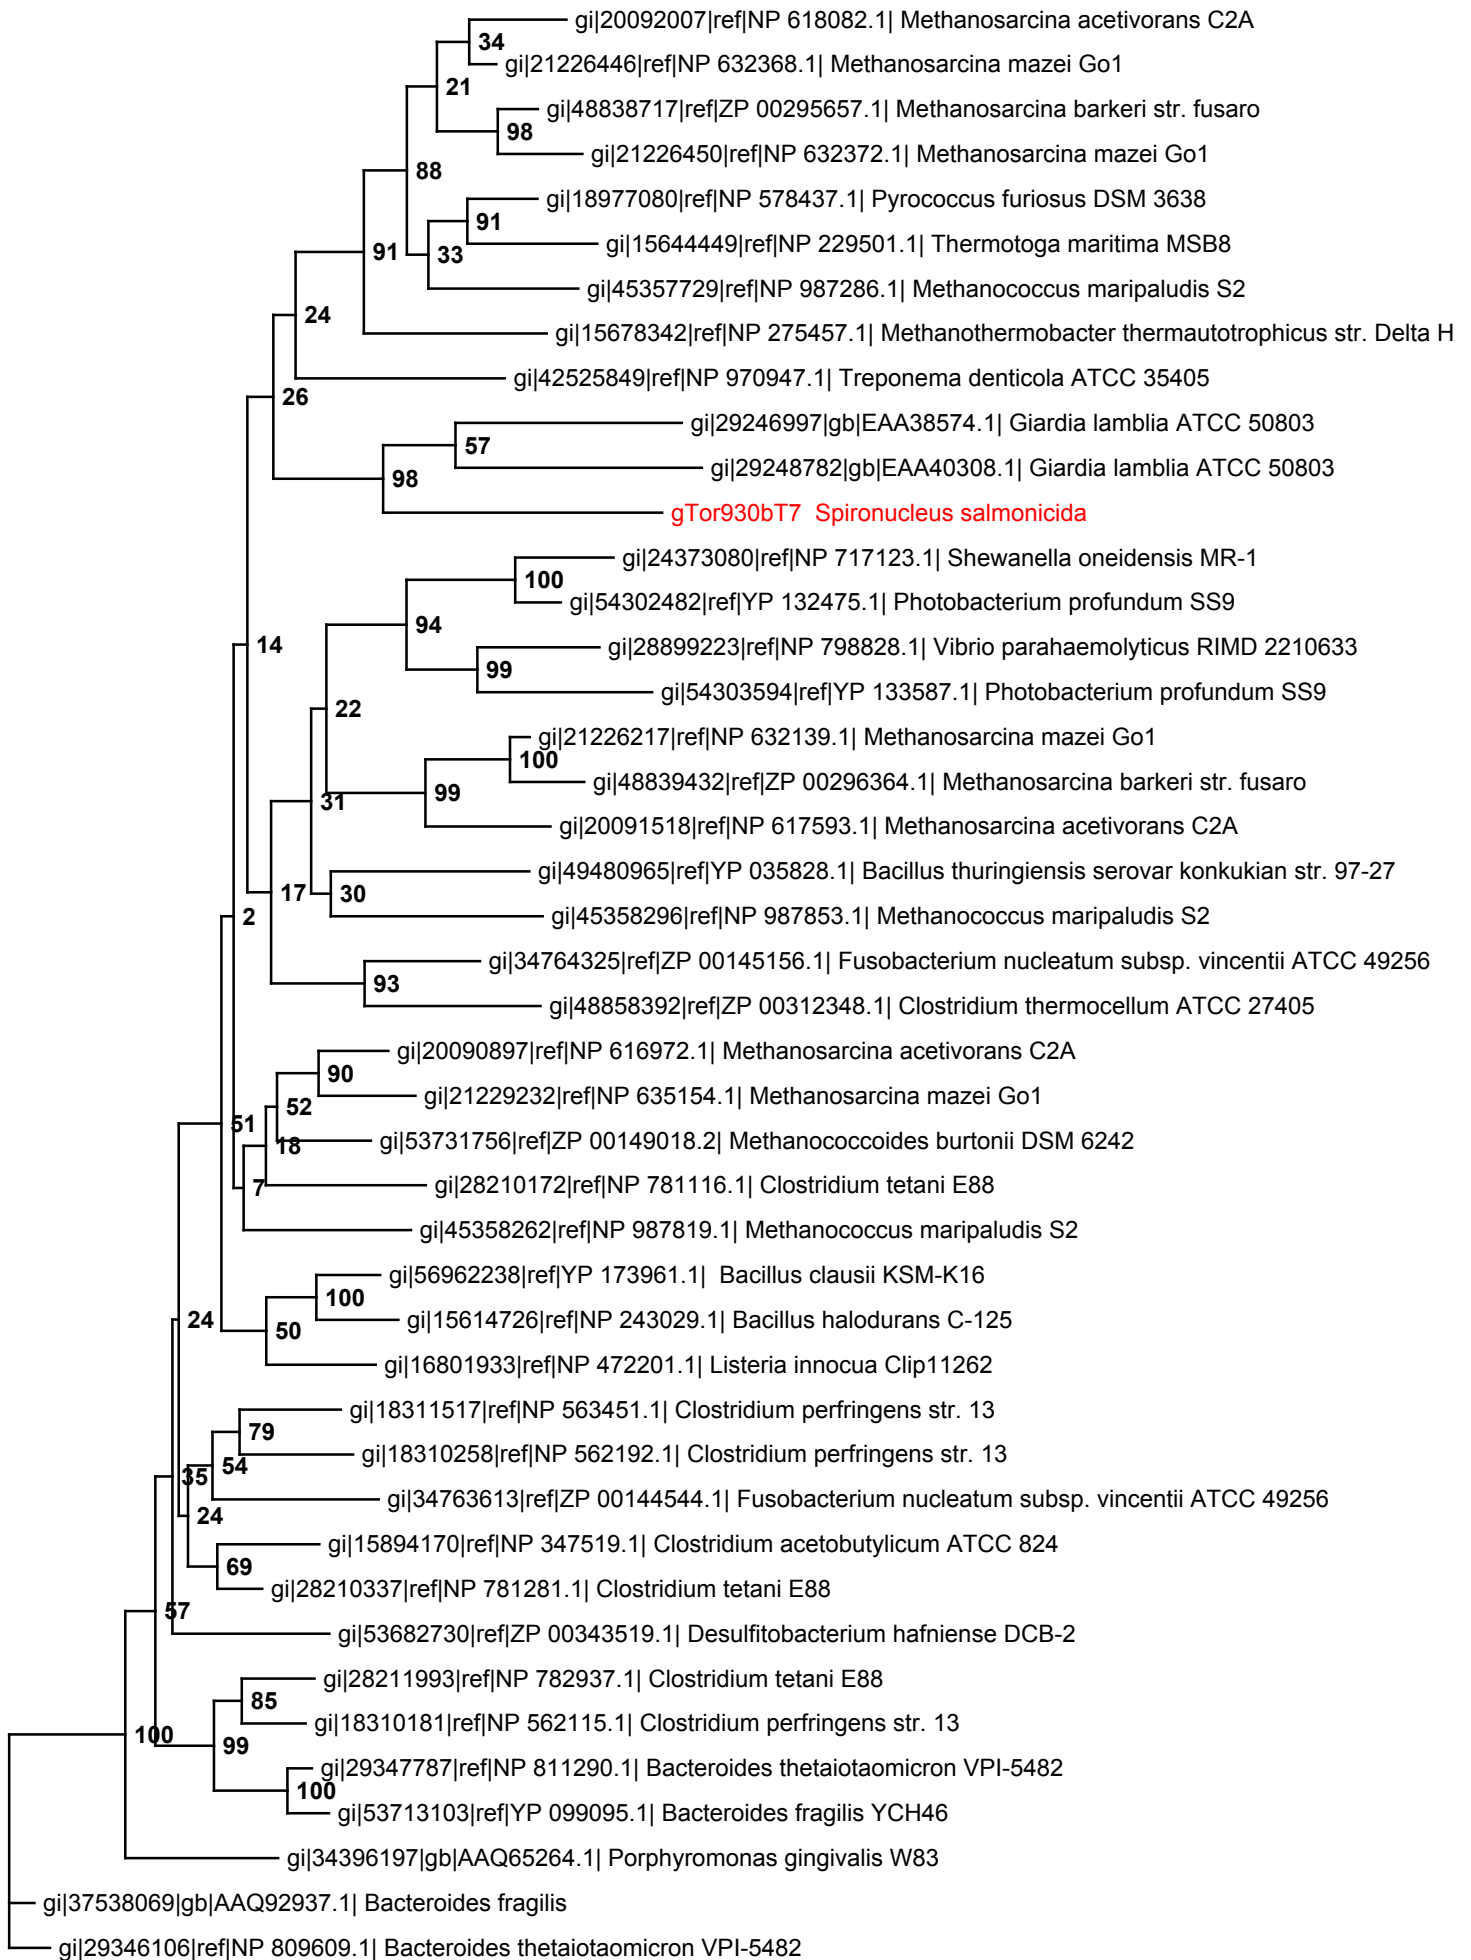

Tree #64: gZap260bT7

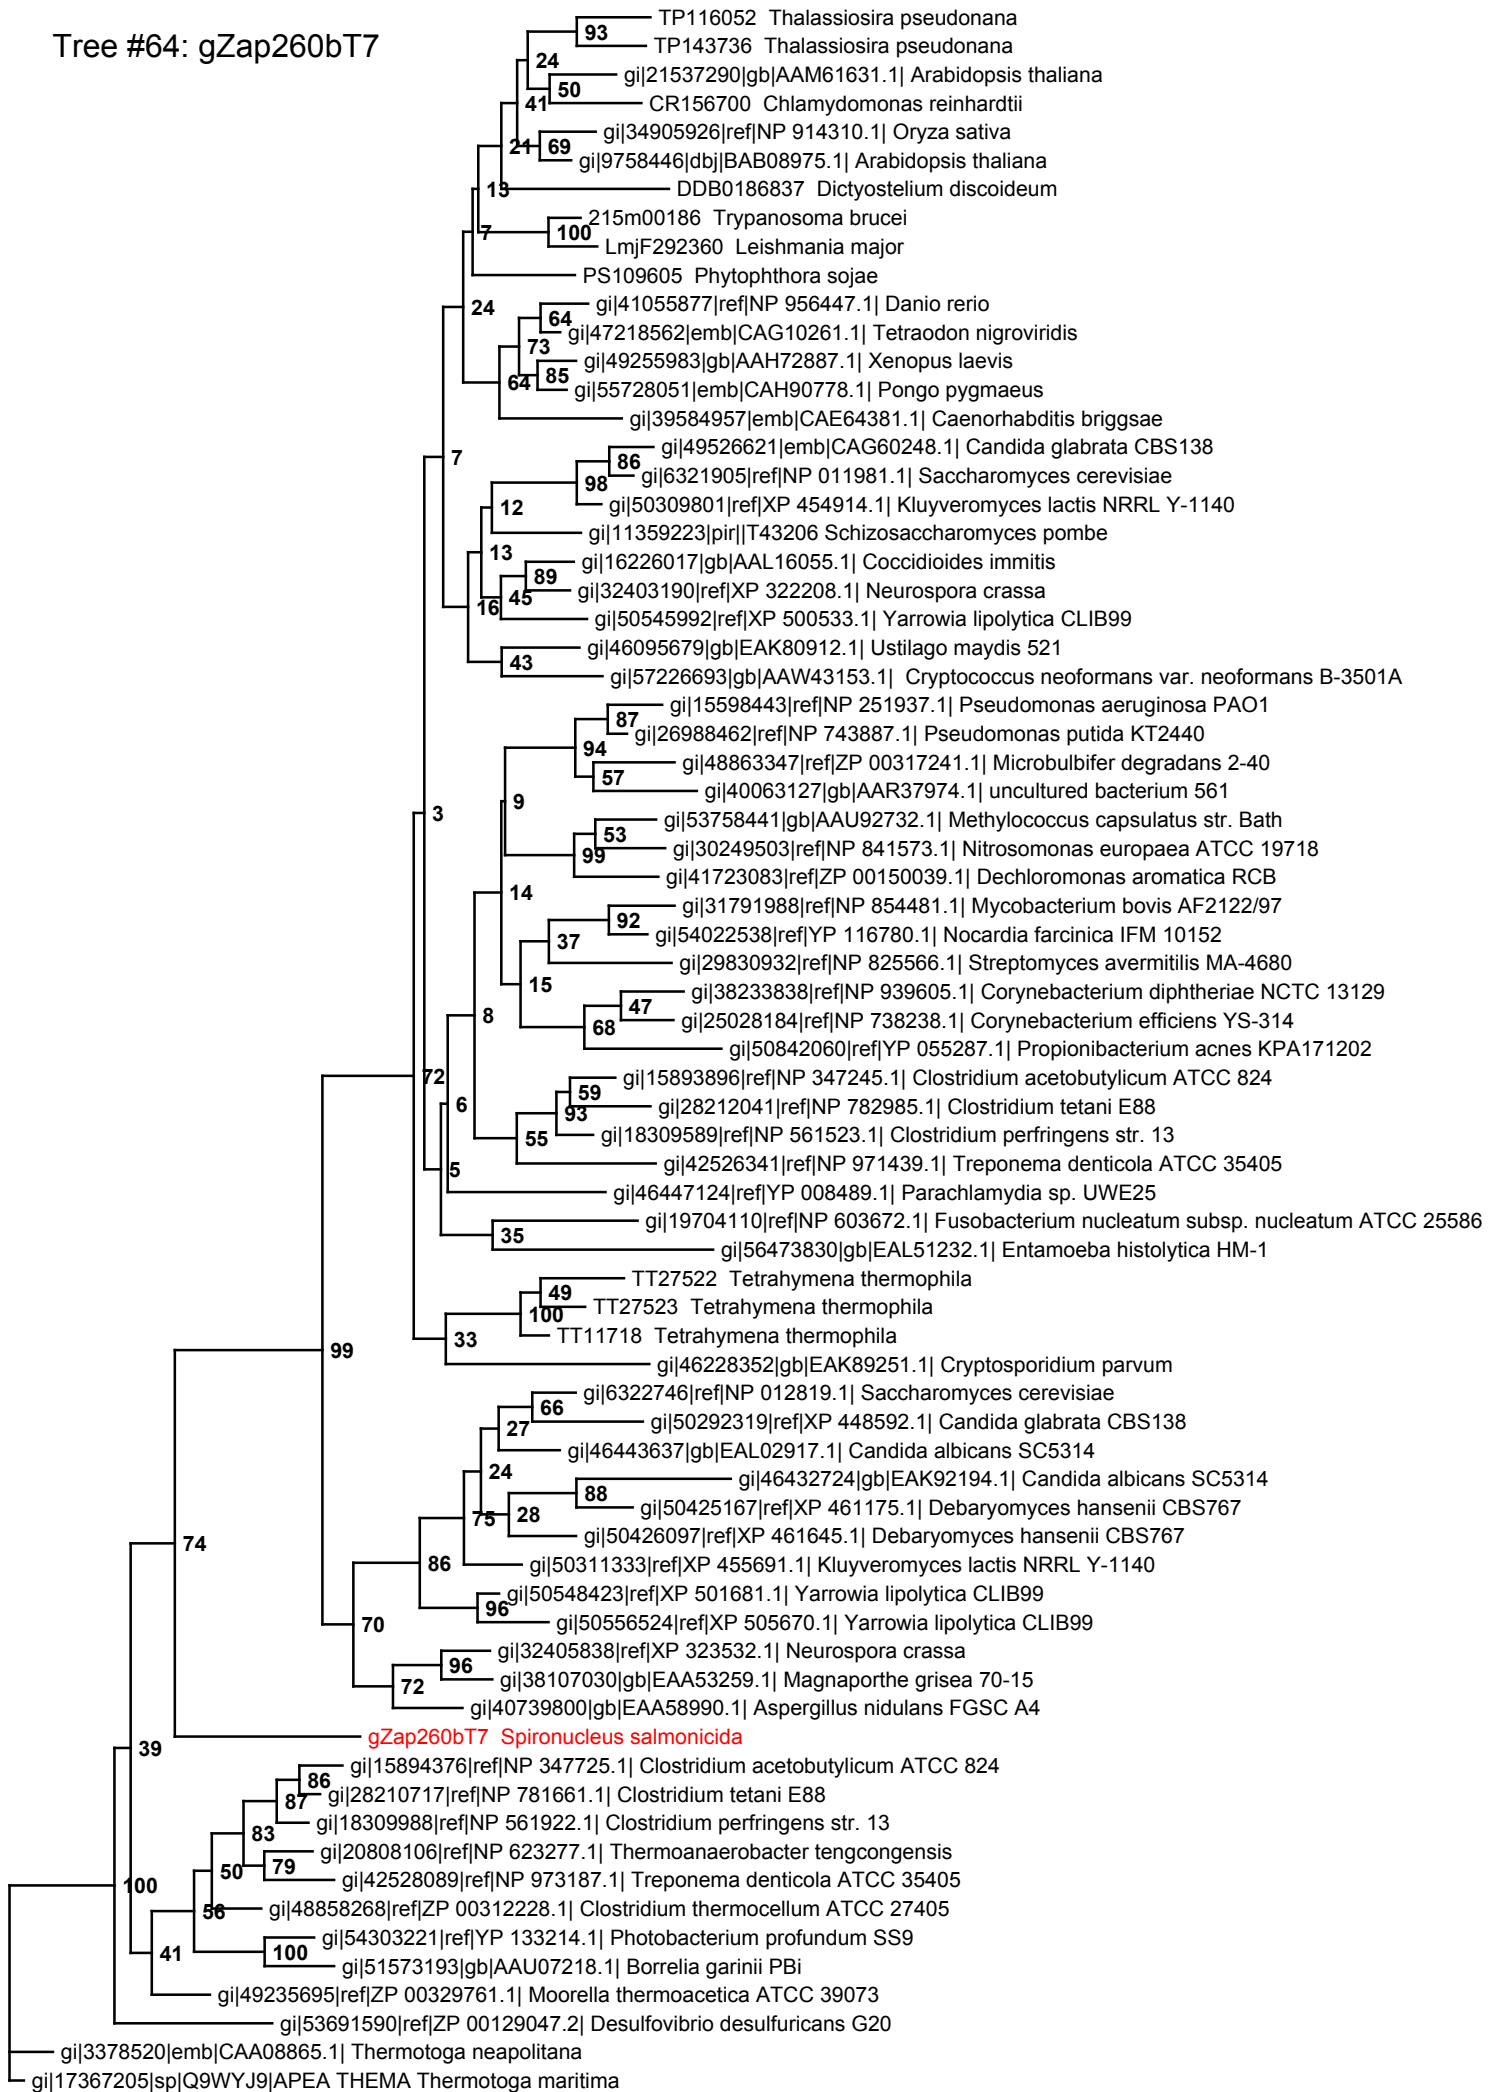

Tree #65: gZap950bT7

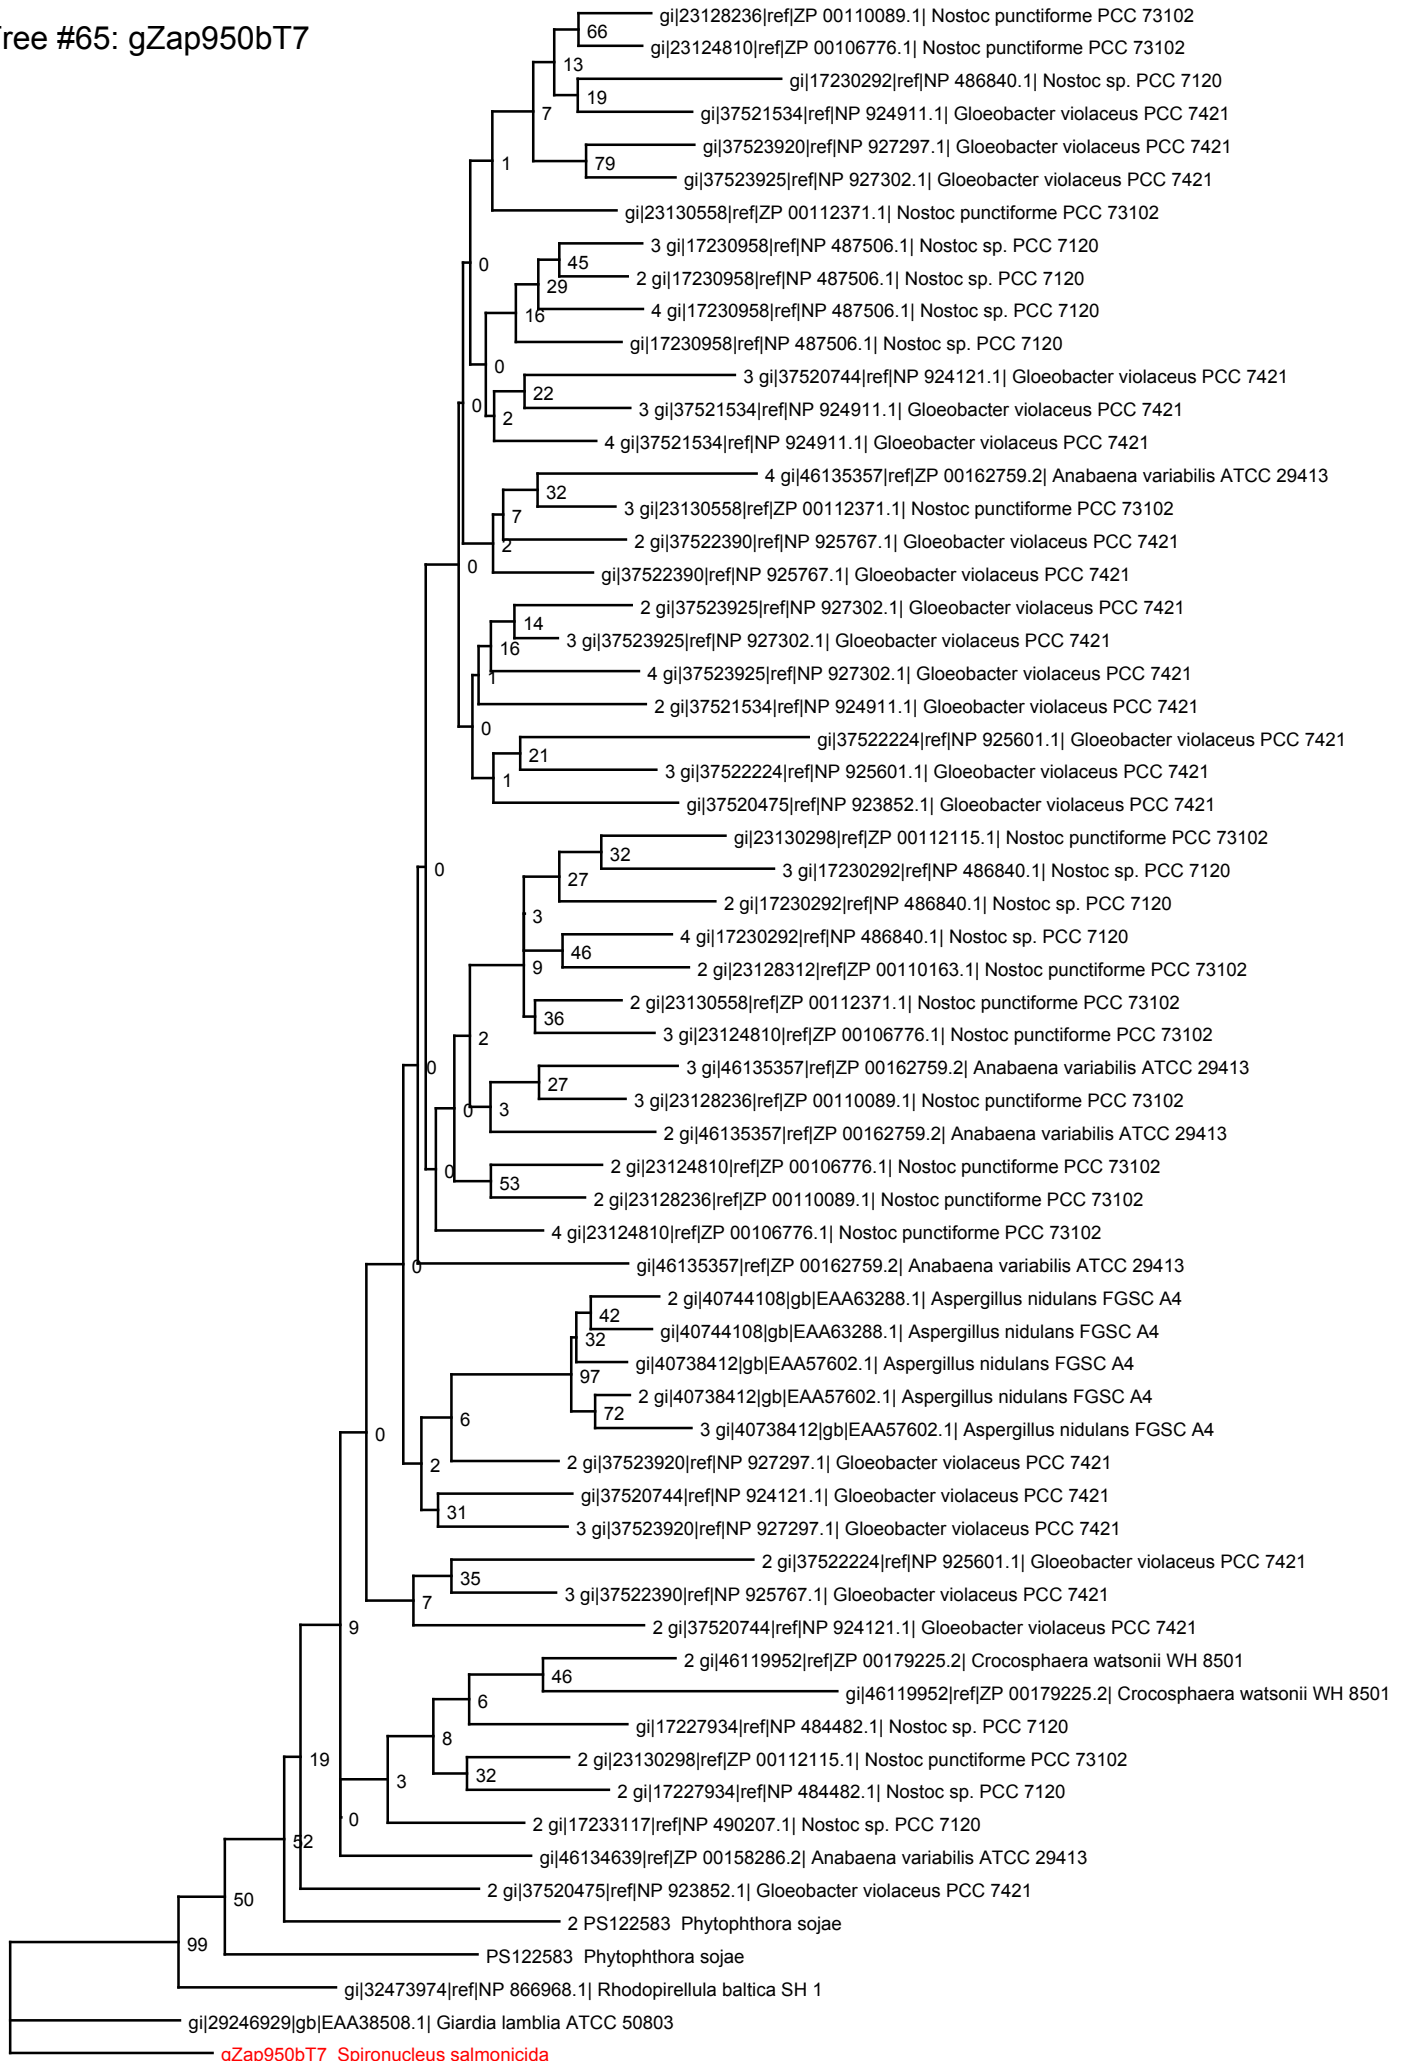

Tree #66: gZar587bT72

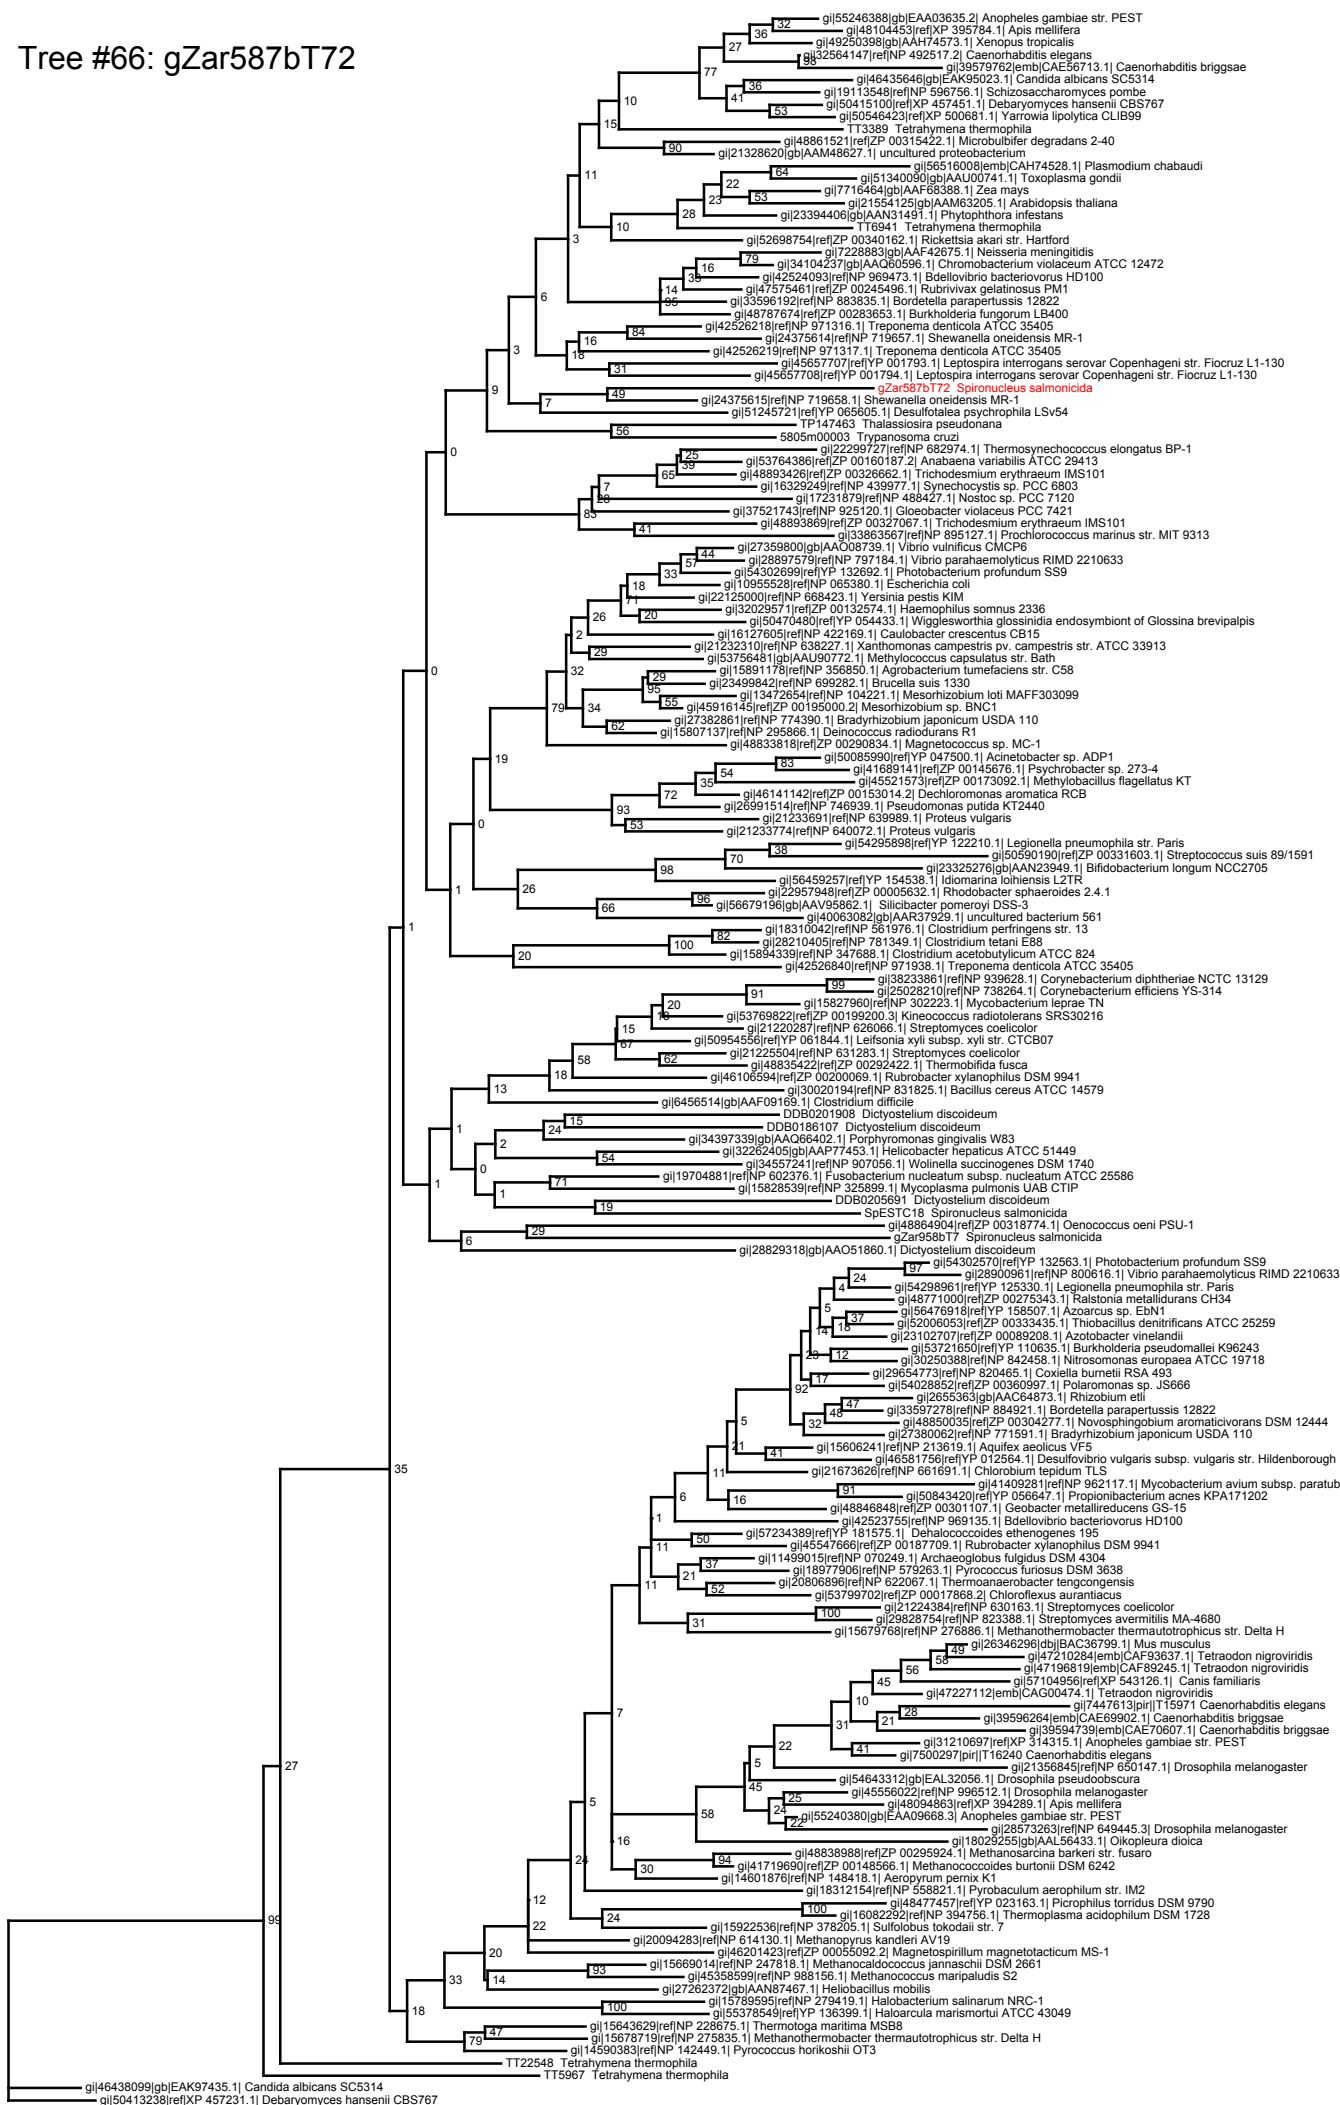



Tree #67: gZar847bT7

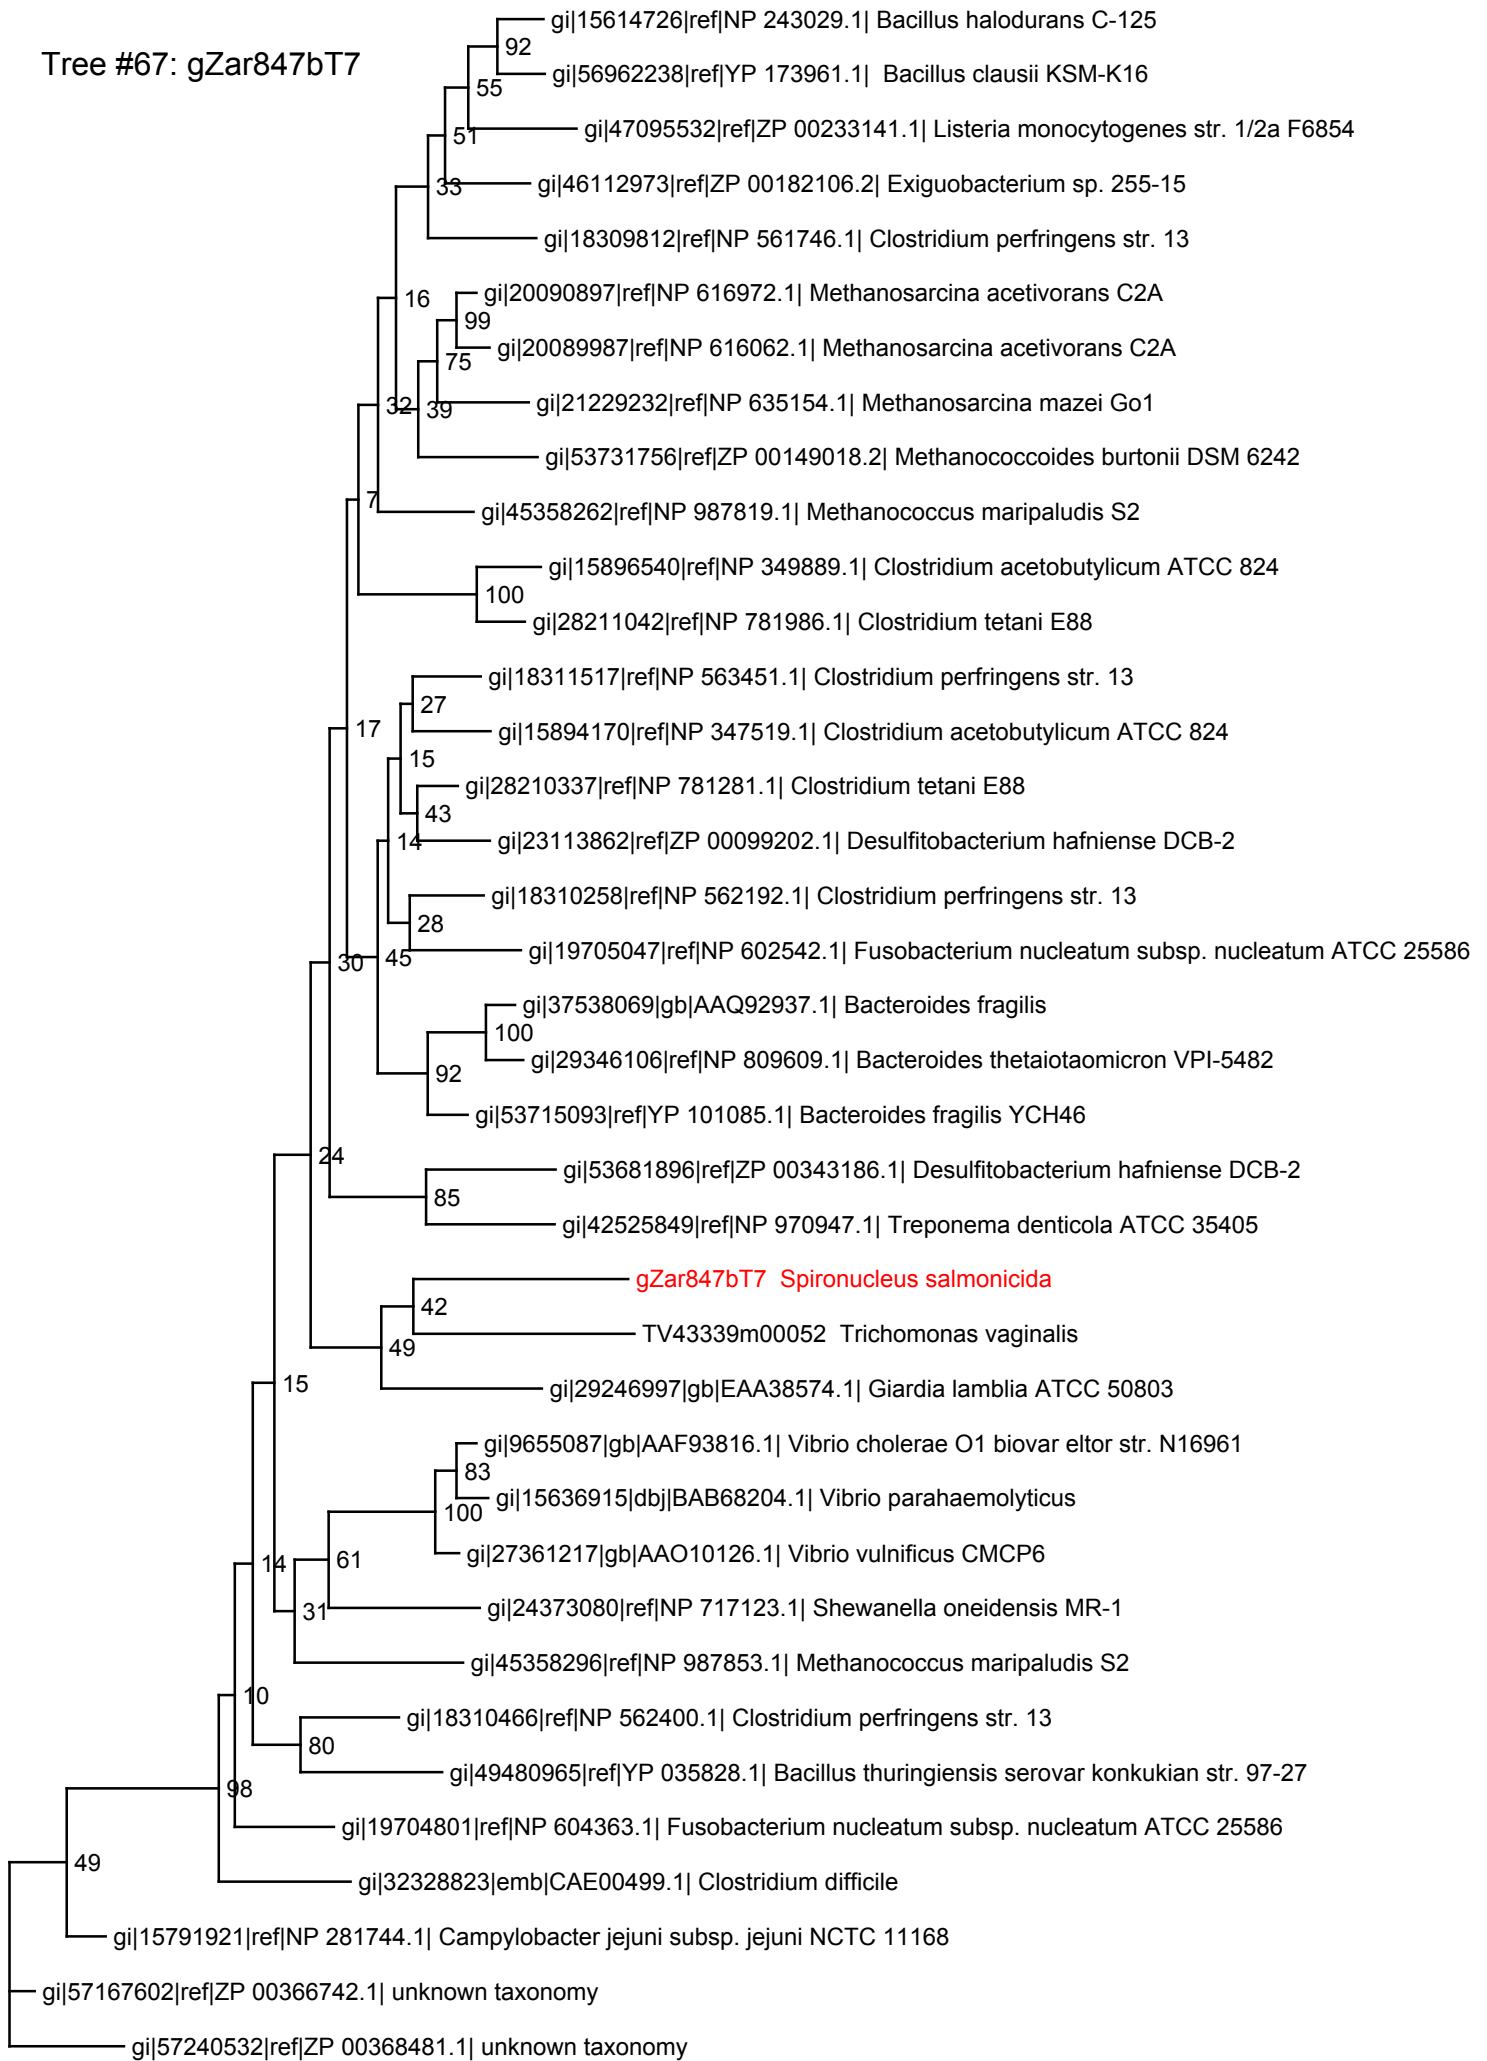

Tree #68: gZar96bT7

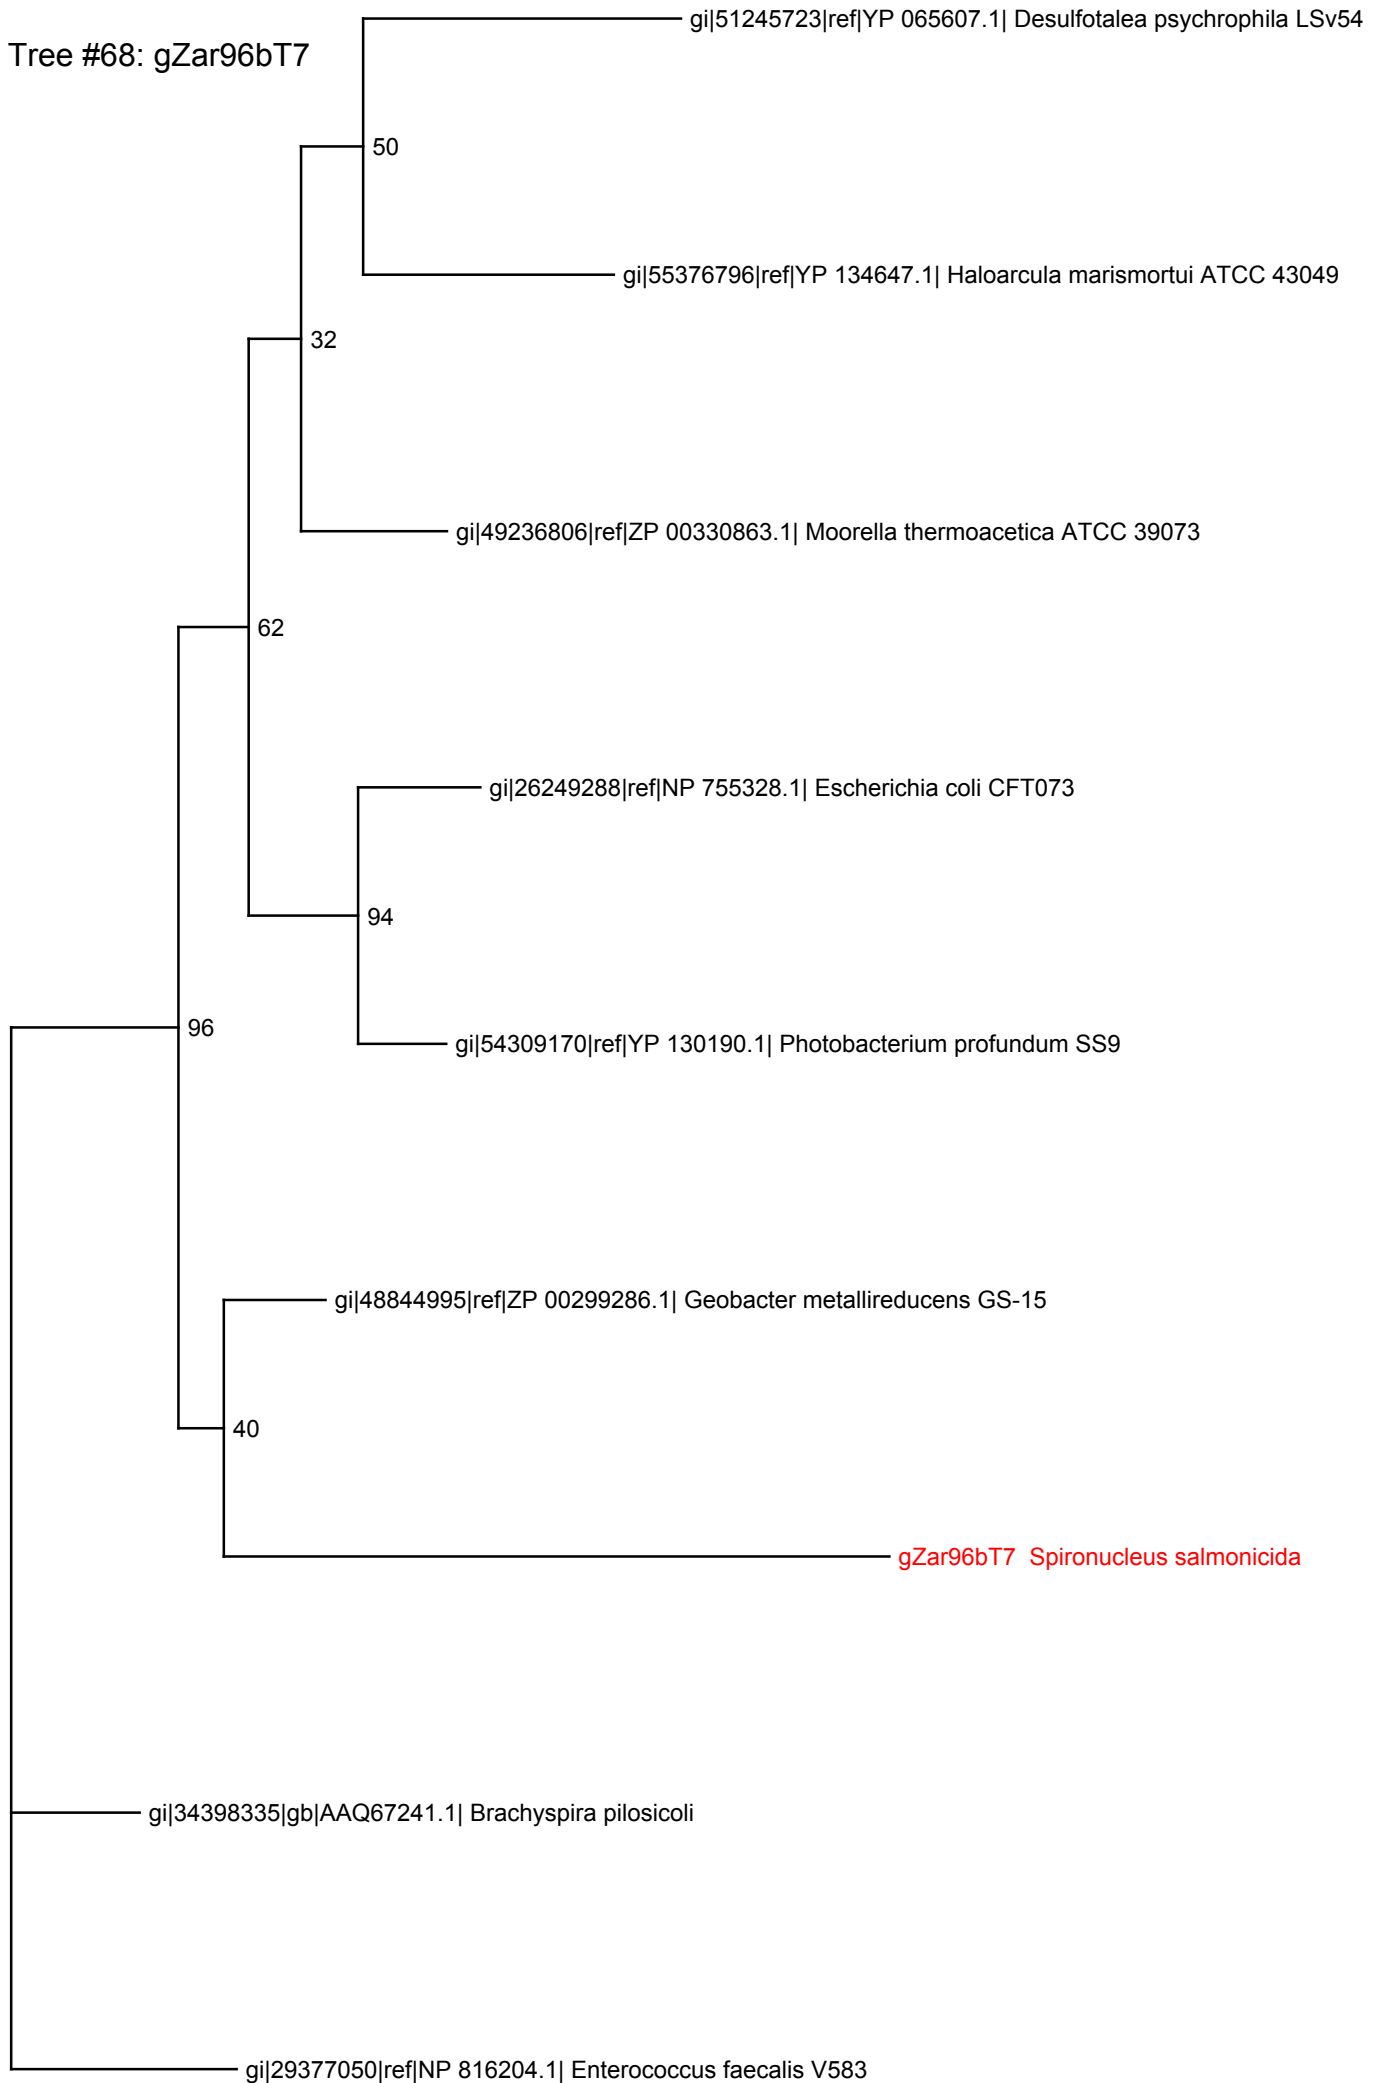

Tree #69: gZar978gT3,  
gZar789bT7

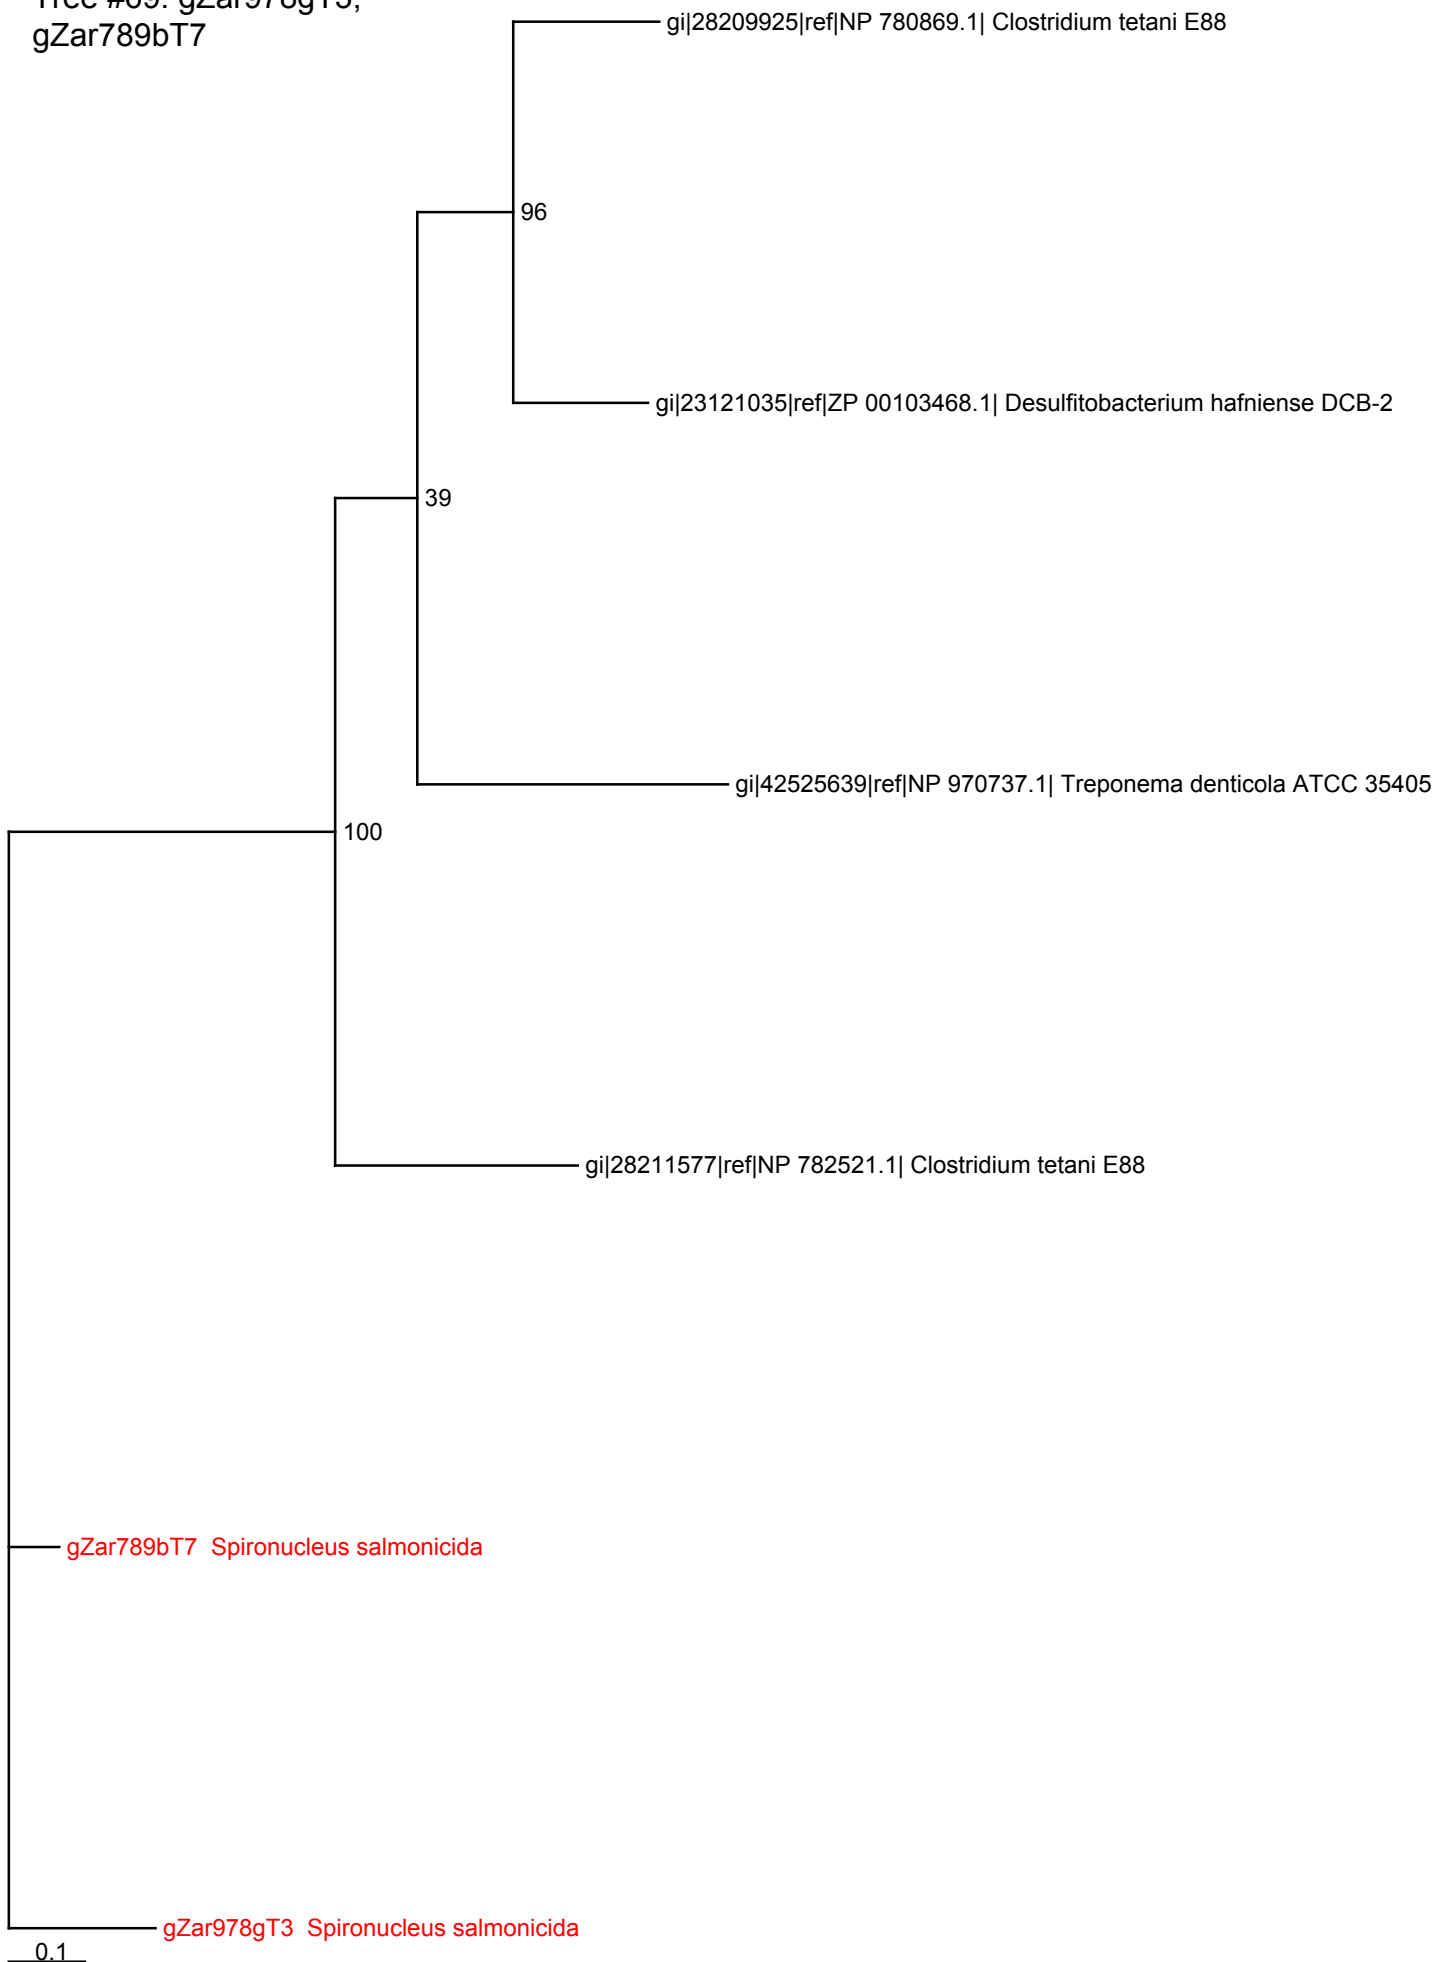

Tree #70: Sp11orf4

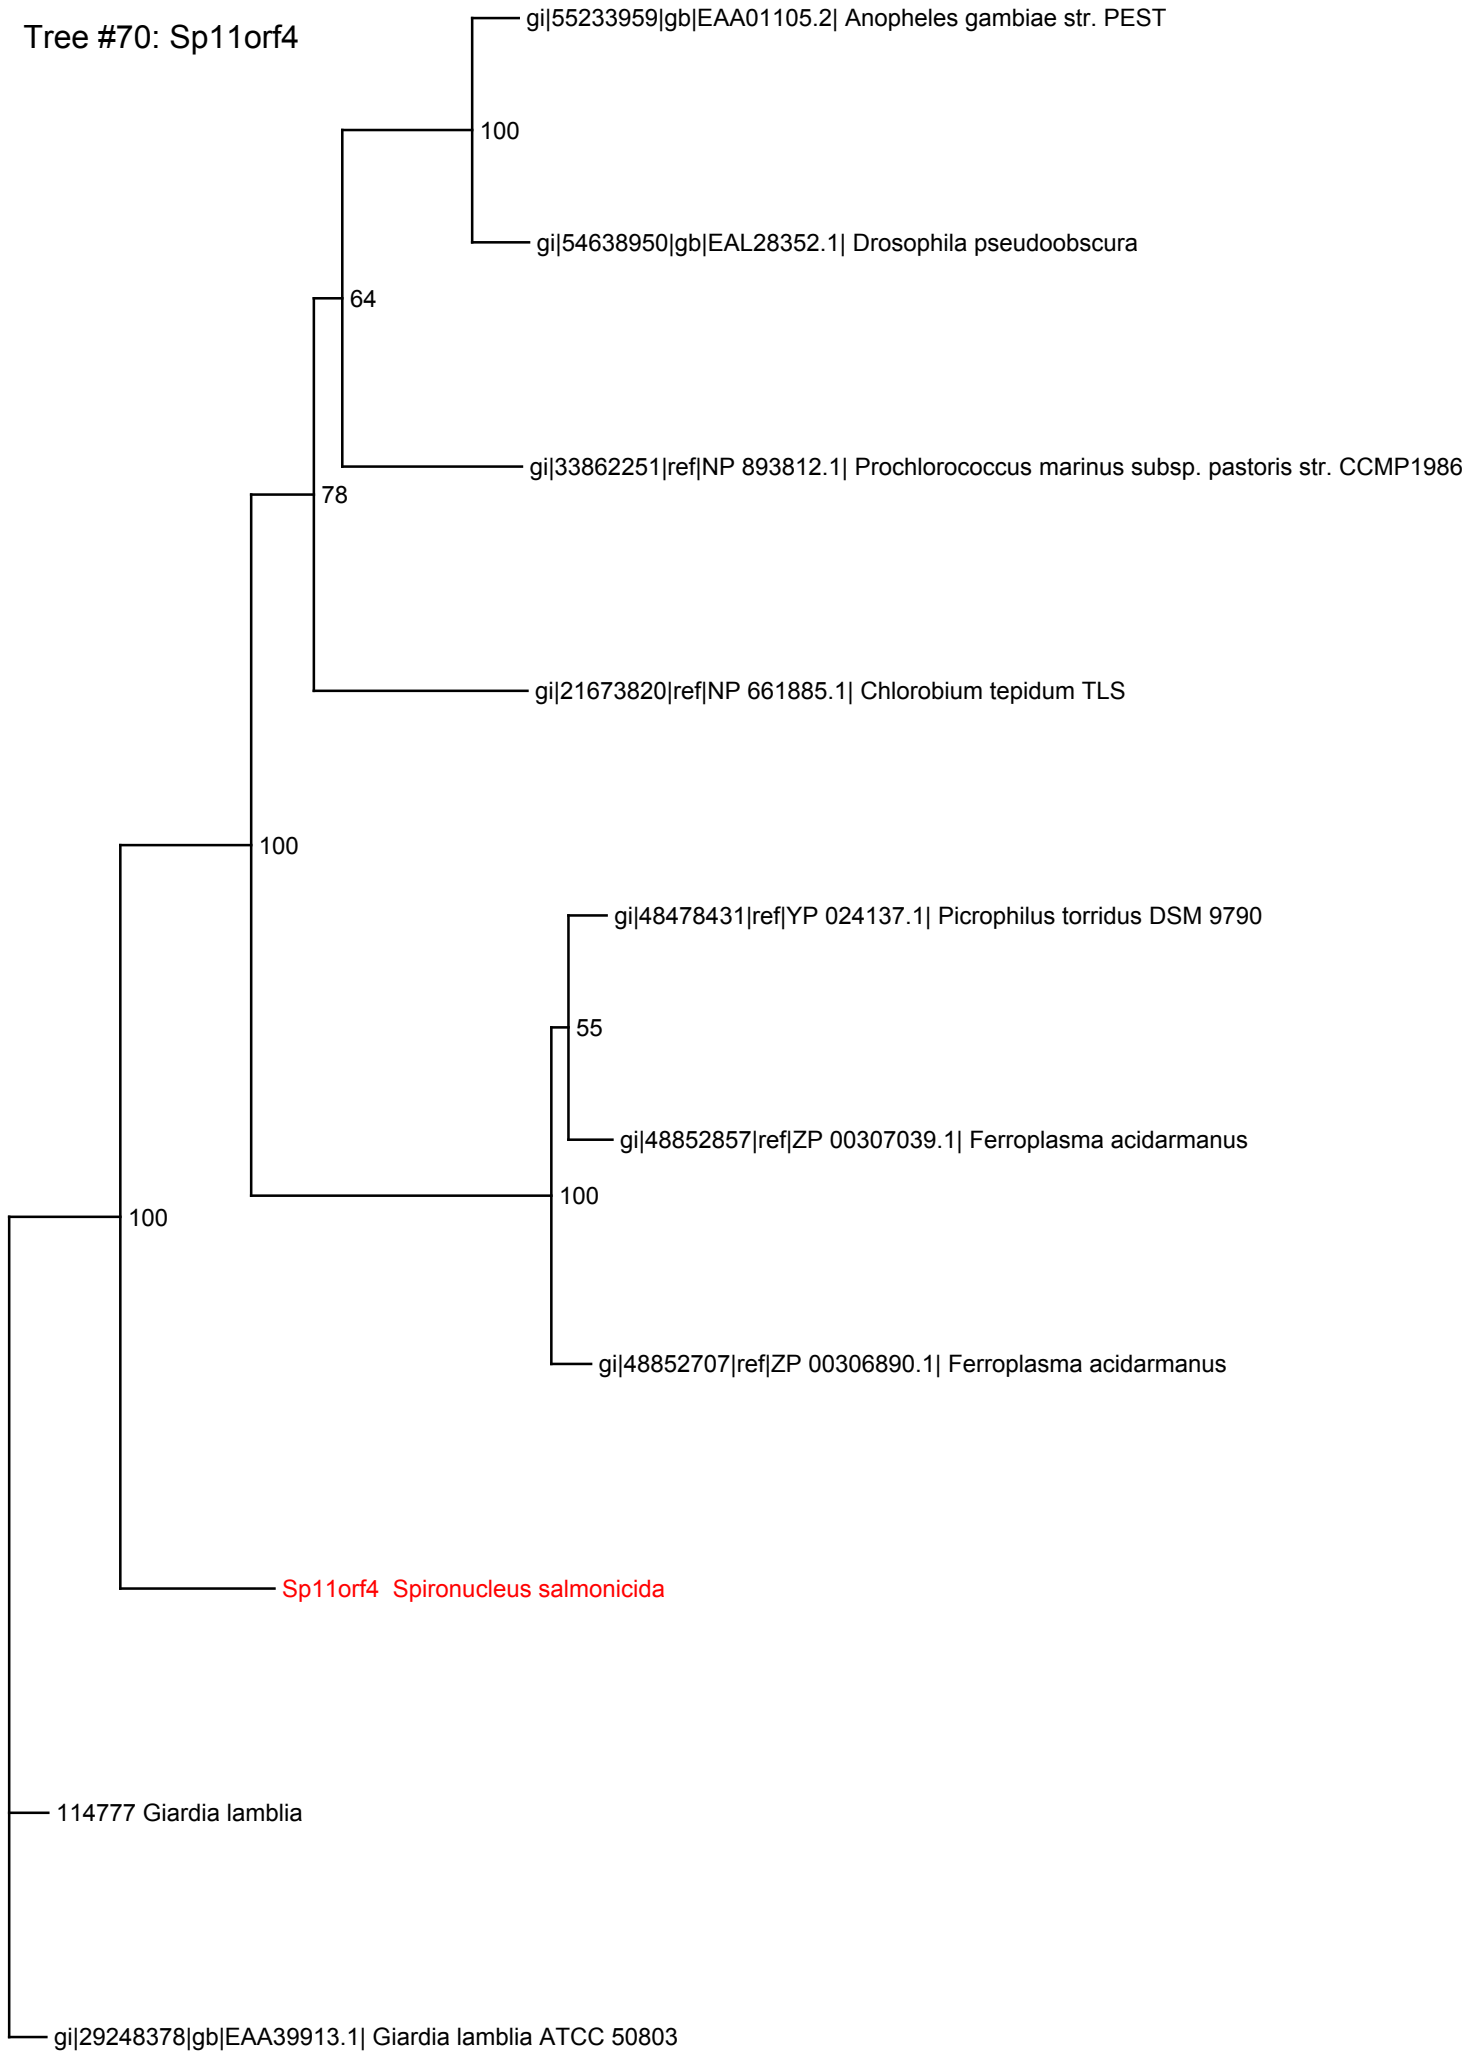



Tree #71: SpESTZap1004

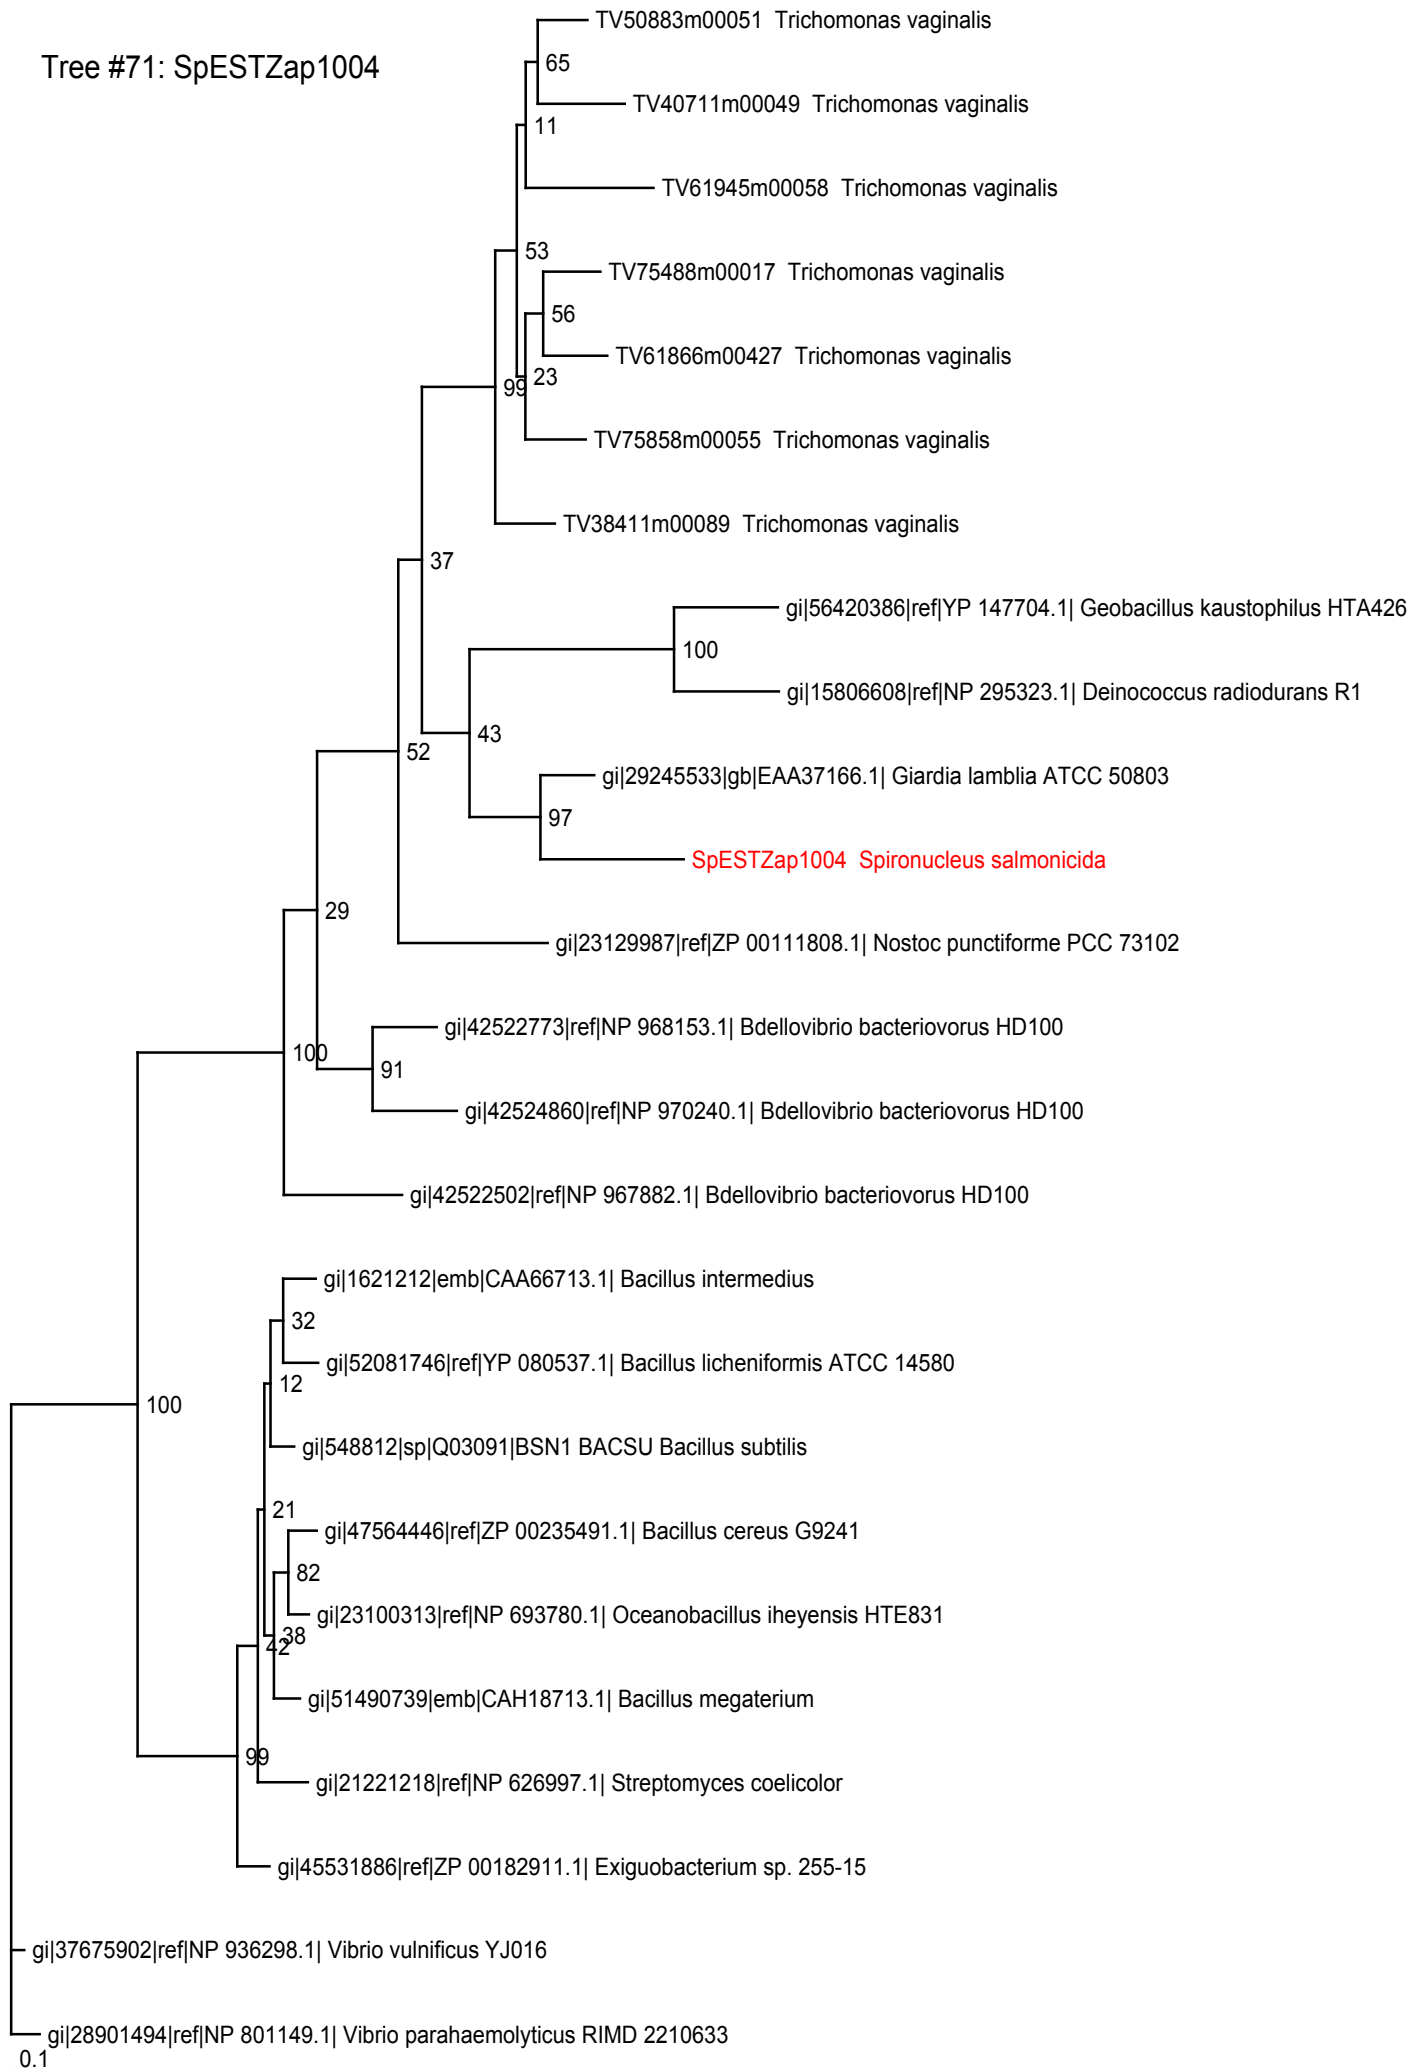

Tree #72: SpESTZap1248

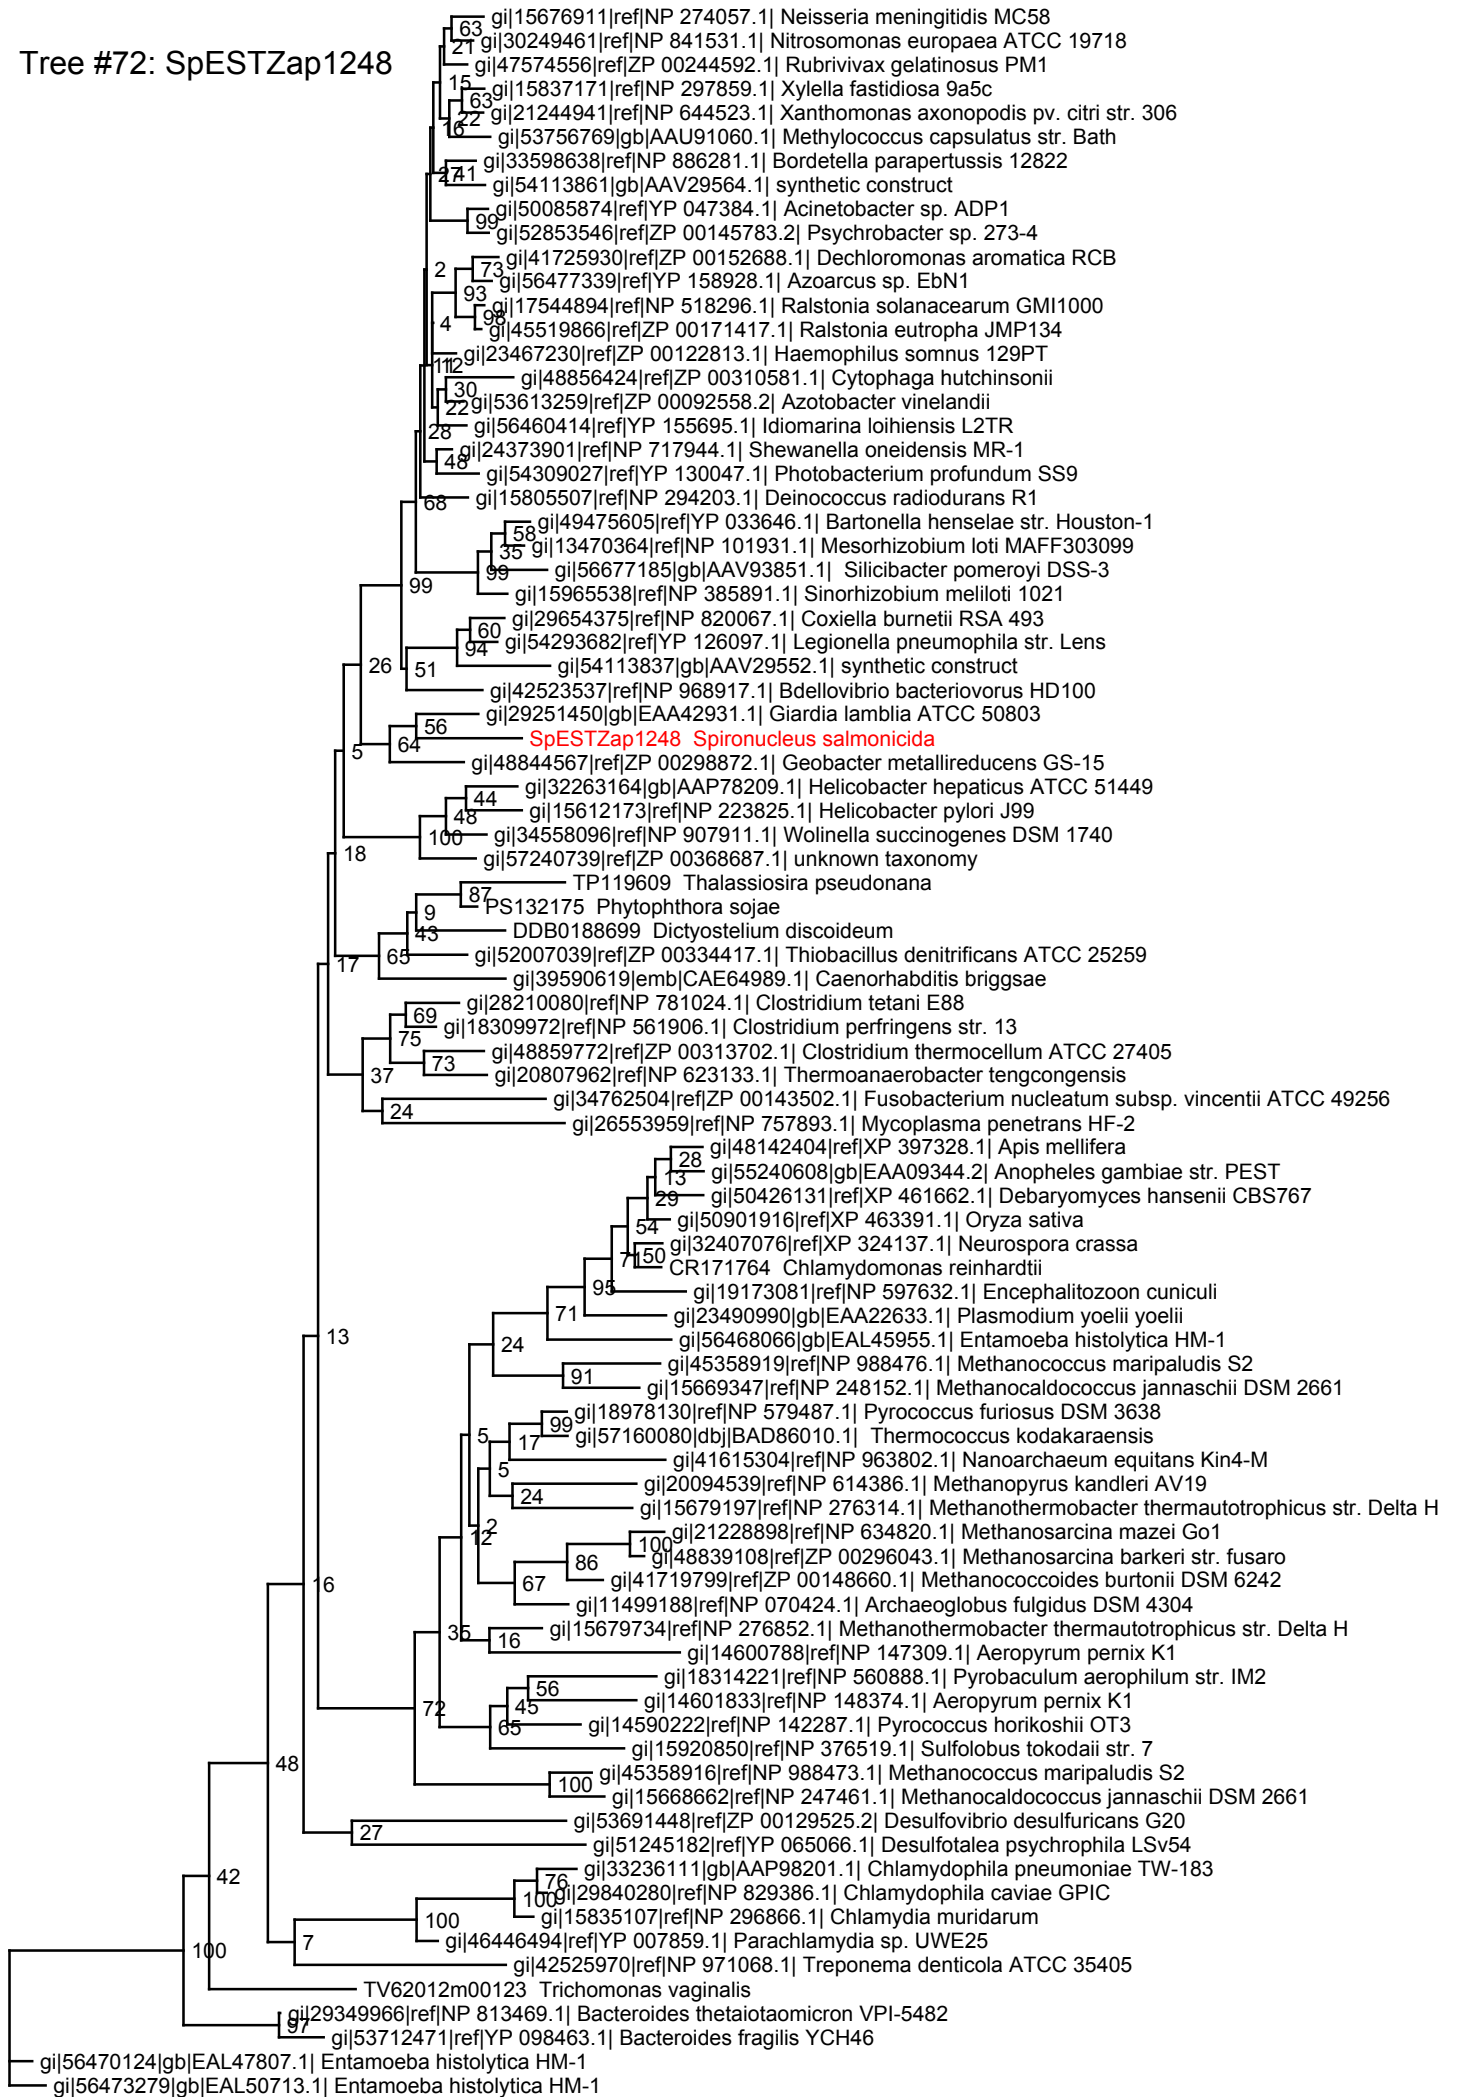

Supplement: 1471-2164-8-51-S6.pdf [file 1471-2164-8-51-S6.pdf]
