# Supplementary material for: A genomic survey of the fish parasite Spironucleus salmonicida indicates genomic plasticity among diplomonads and significant lateral gene transfer in eukaryote genome evolution
Source: PubMed Central journal article supplement (PMC1805757; doi:10.1186/1471-2164-8-51), 2007-02-14
Supplement: 1471-2164-8-51-S1.pdf [file 1471-2164-8-51-S1.pdf]

# A genomic survey of the fish parasite *Spironucleus salmonicida* indicates genomic plasticity among diplomonads and significant lateral gene transfer in eukaryote genome evolution

Jan O. Andersson, Åsa M. Sjögren, David S. Horner, Colleen A. Murphy, Patricia L. Dyal, Staffan G. Svärd, John M. Logsdon, Jr., Mark A. Ragan, Robert P. Hirt, and Andrew J. Roger

## Additional file 1

Characteristics of the *Spironucleus salmonicida* finished contigs.

|       | overall |       |                |        | coding |       |                  | non-coding |       |
|-------|---------|-------|----------------|--------|--------|-------|------------------|------------|-------|
|       | length  | GC    | #genes         | coding | length | GC    | GC3 <sub>s</sub> | length     | GC    |
| Sp1   | 14440   | 47,4% | 6              | 82%    | 11901  | 45,6% | 45,8%            | 2539       | 47,3% |
| Sp2   | 12550   | 30,7% | 9              | 96%    | 12093  | 30,0% | 23,7%            | 457        | 20,8% |
| Sp3   | 14129   | 31,2% | 9              | 84%    | 11853  | 31,2% | 22,5%            | 2276       | 25,5% |
| Sp4   | 4892    | 24,9% | 0              | -      | 0      | -     | -                | 4892       | 24,9% |
| Sp5   | 1856    | 35,9% | 1              | 100%   | 1851   | 34,5% | 28,4%            | 3          | 0%    |
| Sp6   | 2365    | 42,3% | 1              | 46%    | 1092   | 45,7% | 46,6%            | 1273       | 37,9% |
| Sp7   | 4163    | 36,4% | 3              | 88%    | 3651   | 36,6% | 28,8%            | 512        | 25,3% |
| Sp8   | 5489    | 58,3% | 3              | 75%    | 4113   | 57,5% | 70,3%            | 1376       | 58,2% |
| Sp9   | 9005    | 32,6% | 2 <sup>1</sup> | 31%    | 2823   | 45,0% | - <sup>1</sup>   | 6182       | 27,0% |
| Sp10  | 3418    | 44,8% | 2              | 60%    | 2058   | 45,5% | 54,3%            | 1360       | 42,1% |
| Sp11  | 8197    | 54,3% | 4              | 82%    | 6681   | 53,1% | 53,1%            | 1516       | 54,0% |
| TOTAL | 80504   | 39,3% | 40             | 72,2%  | 58116  | 39,9% | 37,3%            | 22388      | 37,9% |

<sup>1</sup>)This contig encodes 18S and 28S ribosomal RNA.
