# Supplementary material for: A genomic survey of the fish parasite Spironucleus salmonicida indicates genomic plasticity among diplomonads and significant lateral gene transfer in eukaryote genome evolution
Source: PubMed Central journal article supplement (PMC1805757; doi:10.1186/1471-2164-8-51), 2007-02-14
Supplement: 1471-2164-8-51-S2.pdf [file 1471-2164-8-51-S2.pdf]

# A genomic survey of the fish parasite *Spiroucleus salmonicida* indicates genomic plasticity among diplomonads and significant lateral gene transfer in eukaryote genome evolution

Jan O. Andersson, Åsa M. Sjögren, David S. Horner, Colleen A. Murphy, Patricia L. Dyal, Staffan G. Svärd, John M. Logsdon, Jr., Mark A. Ragan, Robert P. Hirt, and Andrew J. Roger

## Additional file 2

Genes identified in the *Spiroucleus salmonicida* genome survey.

| Clone          | L <sub>aa</sub> <sup>†</sup> | C <sup>‡</sup> | TM <sup>§</sup> | LGT <sup>¶</sup> | Protein                                                 | Classification                                                      |
|----------------|------------------------------|----------------|-----------------|------------------|---------------------------------------------------------|---------------------------------------------------------------------|
| gSpZar1039gT3  | 164                          |                |                 |                  | synovial sarcoma, X breakpoint 2 interacting protein    | Cellular Processes; Cell Communication; Adherens junction           |
| SpESTDH110     | 200                          |                |                 |                  | cingulin                                                | Cellular Processes; Cell Communication; Tight junction              |
| SpESTC112      | 197                          |                |                 |                  | Rab GTPase                                              | Cellular Processes; Cell Communication; Tight junction              |
| SpESTC208      | 205                          |                |                 |                  | Rab GTPase                                              | Cellular Processes; Cell Communication; Tight junction              |
| SpESTC44       | 211                          |                |                 |                  | Rab GTPase                                              | Cellular Processes; Cell Communication; Tight junction              |
| SpESTC106      | 203                          |                |                 |                  | Rab GTPase                                              | Cellular Processes; Cell Communication; Tight junction              |
| SpESTZap199    | 73                           |                |                 |                  | Rab GTPase                                              | Cellular Processes; Cell Communication; Tight junction              |
| SpESTC67       | 197                          |                | TM              |                  | cAMP-dependent protein kinase regulator                 | Cellular Processes; Cell Growth and Death; Apoptosis                |
| gSpZar984gT3   | 204                          |                |                 |                  | cell cycle arrest protein BUB2                          | Cellular Processes; Cell Growth and Death; Cell cycle               |
| gSpZap189bT7   | 172                          |                |                 |                  | cell division control protein CDC54                     | Cellular Processes; Cell Growth and Death; Cell cycle               |
| gSpTor126bT7   | 229                          |                |                 |                  | cyclin-dependent kinase                                 | Cellular Processes; Cell Growth and Death; Cell cycle               |
| gSpZap342bT7   | 134                          |                |                 |                  | cyclin-dependent kinase                                 | Cellular Processes; Cell Growth and Death; Cell cycle               |
| gSpZar649bT7   | 247                          |                |                 |                  | cyclin-dependent kinase                                 | Cellular Processes; Cell Growth and Death; Cell cycle               |
| SpESTZap1774   | 165                          |                |                 |                  | cyclin-dependent kinase 2                               | Cellular Processes; Cell Growth and Death; Cell cycle               |
| gSpZar325gT3   | 205                          |                |                 |                  | minichromosome maintenance protein MCM2                 | Cellular Processes; Cell Growth and Death; Cell cycle               |
| gSpZal621bMF   | 247                          |                |                 |                  | minichromosome maintenance protein MCM3                 | Cellular Processes; Cell Growth and Death; Cell cycle               |
| gSpTor508bT7   | 165                          |                |                 |                  | ser/thr/tyr protein kinase RAD53                        | Cellular Processes; Cell Growth and Death; Cell cycle               |
| SpESTC69       | 171                          |                |                 |                  | serine/threonine-protein kinase HSL1                    | Cellular Processes; Cell Growth and Death; Cell cycle               |
| SpESTC88       | 218                          |                |                 |                  | ATP-binding protein involved in chromosome partitioning | Cellular Processes; Cell Growth and Death; Cell division            |
| gSpTor587bT7   | 191                          |                |                 |                  | chromosome segregation protein                          | Cellular Processes; Cell Growth and Death; Cell division            |
| gSpZap14gT3    | 192                          |                |                 |                  | chromosome segregation protein                          | Cellular Processes; Cell Growth and Death; Cell division            |
| gSpZar1022bT7  | 204                          |                |                 |                  | chromosome segregation protein                          | Cellular Processes; Cell Growth and Death; Cell division            |
| gSpZar333gT3   | 187                          |                |                 |                  | chromosome segregation protein                          | Cellular Processes; Cell Growth and Death; Cell division            |
| gSpZar828gT3   | 234                          |                |                 |                  | chromosome segregation protein                          | Cellular Processes; Cell Growth and Death; Cell division            |
| gSpTor651gT3   | 245                          |                |                 |                  | chromosome segregation protein                          | Cellular Processes; Cell Growth and Death; Cell division            |
| SpESTZap1222   | 251                          |                |                 |                  | chromosome segregation protein                          | Cellular Processes; Cell Growth and Death; Cell division            |
| SpESTZap839    | 209                          |                |                 |                  | chromosome segregation protein                          | Cellular Processes; Cell Growth and Death; Cell division            |
| gSpZap25bT7    | 127                          |                |                 |                  | actin, beta/gamma, cytoplasmic                          | Cellular Processes; Cell Motility; Regulation of actin cytoskeleton |
| gSpTor118gT3   | 212                          |                |                 |                  | actinin, alpha                                          | Cellular Processes; Cell Motility; Regulation of actin cytoskeleton |
| gSpTor1552bT7  | 214                          | C              |                 |                  | integrin, beta                                          | Cellular Processes; Cell Motility; Regulation of actin cytoskeleton |
| gSpTor874bT7_2 | 172                          | C              |                 |                  | integrin, beta                                          | Cellular Processes; Cell Motility; Regulation of actin cytoskeleton |
| gSpZap165gT3   | 178                          | C              |                 |                  | integrin, beta                                          | Cellular Processes; Cell Motility; Regulation of actin cytoskeleton |
| SpESTZap1171   | 210                          | C              |                 |                  | integrin, beta                                          | Cellular Processes; Cell Motility; Regulation of actin cytoskeleton |
| gSpZar519gT3   | 70                           |                |                 |                  | slingshot                                               | Cellular Processes; Cell Motility; Regulation of actin cytoskeleton |
| gSpTor1229bMF  | 253                          | C              |                 |                  | gurken receptor precursor (torpedo)                     | Cellular Processes; Development; Dorsal-ventral axis formation      |
| SpESTDH444     | 187                          |                |                 |                  | adaptor protein complex medium subunit                  | Cellular Processes; unclassified                                    |
| gSpTor930gT3_2 | 108                          |                |                 |                  | cyst wall protein                                       | Cellular Processes; unclassified                                    |
| gSpTor1317bMF  | 207                          |                |                 |                  | cysteine protease                                       | Cellular Processes; unclassified                                    |
| gSpZar78bT7    | 110                          |                |                 |                  | cysteine protease                                       | Cellular Processes; unclassified                                    |
| SpESTC243      | 225                          |                |                 |                  | cysteine protease                                       | Cellular Processes; unclassified                                    |
| SpESTDH301     | 233                          |                |                 |                  | cysteine protease                                       | Cellular Processes; unclassified                                    |
| SpESTZap1687   | 216                          |                |                 |                  | dynactin                                                | Cellular Processes; unclassified                                    |
| Sp3orf4        | 746                          |                |                 |                  | dynammin-like protein                                   | Cellular Processes; unclassified                                    |
| gSpTor128bMF   | 178                          |                |                 |                  | dynein                                                  | Cellular Processes; unclassified                                    |
| gSpTor141bMF   | 153                          |                |                 |                  | dynein                                                  | Cellular Processes; unclassified                                    |
| gSpTor135gT3   | 230                          |                |                 |                  | dynein                                                  | Cellular Processes; unclassified                                    |
| gSpTor169bT7   | 249                          |                |                 |                  | dynein                                                  | Cellular Processes; unclassified                                    |
| gSpTor186bT7   | 235                          |                |                 |                  | dynein                                                  | Cellular Processes; unclassified                                    |
| gSpTor186gT3   | 220                          |                |                 |                  | dynein                                                  | Cellular Processes; unclassified                                    |
| gSpTor238gT3   | 210                          |                |                 |                  | dynein                                                  | Cellular Processes; unclassified                                    |
| gSpTor253bT7   | 189                          |                |                 |                  | dynein                                                  | Cellular Processes; unclassified                                    |
| gSpTor253gT3   | 235                          |                |                 |                  | dynein                                                  | Cellular Processes; unclassified                                    |
| gSpTor569bT7   | 201                          |                |                 |                  | dynein                                                  | Cellular Processes; unclassified                                    |
| gSpTor982bT7   | 215                          |                |                 |                  | dynein                                                  | Cellular Processes; unclassified                                    |
| gSpZal387bMF   | 143                          |                |                 |                  | dynein                                                  | Cellular Processes; unclassified                                    |
| gSpZap275bT7   | 97                           |                |                 |                  | dynein                                                  | Cellular Processes; unclassified                                    |
| gSpZap451bT7   | 183                          |                |                 |                  | dynein                                                  | Cellular Processes; unclassified                                    |
| gSpZap451gT3   | 160                          |                |                 |                  | dynein                                                  | Cellular Processes; unclassified                                    |
| gSpZap513gT3   | 200                          |                |                 |                  | dynein                                                  | Cellular Processes; unclassified                                    |
| gSpZap79bT7    | 164                          |                |                 |                  | dynein                                                  | Cellular Processes; unclassified                                    |
| gSpZap806gT3   | 180                          |                |                 |                  | dynein                                                  | Cellular Processes; unclassified                                    |
| gSpZar528gT3   | 198                          |                |                 |                  | dynein                                                  | Cellular Processes; unclassified                                    |
| gSpZar684gT3   | 193                          |                |                 |                  | dynein                                                  | Cellular Processes; unclassified                                    |
| SpESTC151      | 108                          |                |                 |                  | dynein                                                  | Cellular Processes; unclassified                                    |
| SpESTC185      | 233                          |                |                 |                  | dynein                                                  | Cellular Processes; unclassified                                    |
| gSpZap349gT3   | 197                          |                |                 |                  | guanidine dissociation inhibitor (GDI)                  | Cellular Processes; unclassified                                    |
| SpESTDH002     | 72                           |                |                 |                  | histone                                                 | Cellular Processes; unclassified                                    |
| SpESTDH406     | 194                          |                |                 |                  | histone acetyltransferase                               | Cellular Processes; unclassified                                    |
| SpESTC285      | 240                          |                |                 |                  | peptidylprolyl isomerase                                | Cellular Processes; unclassified                                    |
| SpESTZap1298   | 230                          |                |                 |                  | phosphotyrosyl phosphatase activator protein            | Cellular Processes; unclassified                                    |
| 1322213        | 395                          |                |                 |                  | tubulin                                                 | Cellular Processes; unclassified                                    |
| SpESTC312      | 448                          |                |                 |                  | tubulin                                                 | Cellular Processes; unclassified                                    |
| SpESTZap1216   | 190                          |                |                 |                  | tubulin                                                 | Cellular Processes; unclassified                                    |
| SpESTZap1633   | 219                          |                |                 |                  | Tubulin tyrosine ligase                                 | Cellular Processes; unclassified                                    |
| SpESTC172      | 245                          |                |                 |                  | annexin                                                 | Environmental Information Processing                                |
| SpESTC206      | 293                          |                |                 |                  | annexin                                                 | Environmental Information Processing                                |

|                |      |    |                                                                       |                                                                                                            |
|----------------|------|----|-----------------------------------------------------------------------|------------------------------------------------------------------------------------------------------------|
| SpESTC56       | 293  |    | annexin                                                               | Environmental Information Processing                                                                       |
| gSpZa608bMF    | 94   |    | GTP-binding protein; COG0012 and pfam06071                            | Environmental Information Processing                                                                       |
| gSpZap37gT3    | 200  |    | GTP-binding protein                                                   | Environmental Information Processing                                                                       |
| SpESTDH259     | 175  |    | GTP-binding protein                                                   | Environmental Information Processing                                                                       |
| gSpZa472bMF    | 111  |    | protein C inhibitor                                                   | Environmental Information Processing                                                                       |
| gSpZap444bT7   | 114  |    | olfactory receptor                                                    | Environmental Information Processing; Ligand-Receptor Interaction; G-protein coupled receptors             |
| gSpZap528bT7   | 43   |    | olfactory receptor                                                    | Environmental Information Processing; Ligand-Receptor Interaction; G-protein coupled receptors             |
| gSpZap596gT3   | 38   |    | olfactory receptor                                                    | Environmental Information Processing; Ligand-Receptor Interaction; G-protein coupled receptors             |
| SpESTC238      | 214  |    | gamma-aminobutyric acid (GABA) A receptor, epsilon                    | Environmental Information Processing; Ligand-Receptor Interaction; Neuroactive ligand-receptor interaction |
| gSpTor556bT7   | 84   | TM | Na+/H+ exchanger/antiporter; pfam00999                                | Environmental Information Processing; Membrane Transport                                                   |
| gSpZap219gT3   | 174  |    | ABC-2 type transport system ATP-binding protein                       | Environmental Information Processing; Membrane Transport; ABC transporters, ABC-2 and other types          |
| Sp1orf1        | 223  | TM | ATP-binding cassette, subfamily C (CFTR/MRP), member 1                | Environmental Information Processing; Membrane Transport; ABC transporters, eukaryotic                     |
| Sp1orf2        | 1514 | TM | ATP-binding cassette, subfamily C (CFTR/MRP), member 5                | Environmental Information Processing; Membrane Transport; ABC transporters, eukaryotic                     |
| gSpZar394bT7   | 78   |    | simple sugar transport system ATP-binding protein                     | Environmental Information Processing; Membrane Transport; ABC transporters, prokaryotic                    |
| gSpZar824bT7   | 120  |    | sulfonate/nitrate transport system ATP-binding protein                | Environmental Information Processing; Membrane Transport; ABC transporters, prokaryotic                    |
| SpESTZap1389   | 238  | TM | LG2 drug:H+ antiporter-2, DHA2 family                                 | Environmental Information Processing; Membrane Transport; Major facilitator superfamily (MFS)              |
| gSpTor1167gT3  | 132  | TM | sugar porter, SP family                                               | Environmental Information Processing; Membrane Transport; Major facilitator superfamily (MFS)              |
| gSpTor978bT7   | 164  | TM | Ca2+ transporting ATPase, plasma membrane                             | Environmental Information Processing; Signal Transduction; Calcium signaling pathway                       |
| gSpTor978gT3   | 161  |    | Ca2+ transporting ATPase, plasma membrane                             | Environmental Information Processing; Signal Transduction; Calcium signaling pathway                       |
| gSpZap127bT7   | 183  | TM | Ca2+ transporting ATPase, plasma membrane                             | Environmental Information Processing; Signal Transduction; Calcium signaling pathway                       |
| gSpTor39bT7    | 85   |    | calmodulin                                                            | Environmental Information Processing; Signal Transduction; Calcium signaling pathway                       |
| Sp1orf5        | 147  |    | Calmodulin                                                            | Environmental Information Processing; Signal Transduction; Calcium signaling pathway                       |
| SpESTZap862    | 171  | TM | Calmodulin                                                            | Environmental Information Processing; Signal Transduction; Calcium signaling pathway                       |
| gSpTor927gT3_2 | 192  |    | cyclin B                                                              | Environmental Information Processing; Signal Transduction; Calcium signaling pathway                       |
| SpESTZap933    | 152  |    | cyclin-dependent kinase 1                                             | Environmental Information Processing; Signal Transduction; Calcium signaling pathway                       |
| gSpZap949gT3   | 141  |    | guanine nucleotide binding protein (G protein), alpha 15              | Environmental Information Processing; Signal Transduction; Calcium signaling pathway                       |
| gSpZa266bMF    | 81   |    | peptidylprolyl isomerase D (cyclophilin D)                            | Environmental Information Processing; Signal Transduction; Calcium signaling pathway                       |
| SpESTDH065     | 160  |    | peptidylprolyl isomerase D (cyclophilin D)                            | Environmental Information Processing; Signal Transduction; Calcium signaling pathway                       |
| gSpZar353bT7   | 112  |    | extracellular signal-regulated kinase                                 | Environmental Information Processing; Signal Transduction; MAPK signaling pathway                          |
| SpESTDH126     | 240  |    | extracellular signal-regulated kinase                                 | Environmental Information Processing; Signal Transduction; MAPK signaling pathway                          |
| SpESTZap854    | 230  |    | extracellular signal-regulated kinase                                 | Environmental Information Processing; Signal Transduction; MAPK signaling pathway                          |
| gSpZar658bT7   | 189  |    | inhibitor of kappa light polypeptide gene enhancer in B-cells, kinase | Environmental Information Processing; Signal Transduction; MAPK signaling pathway                          |
| SpESTZap869    | 183  |    | misshapen/NIK-related kinase                                          | Environmental Information Processing; Signal Transduction; MAPK signaling pathway                          |
| SpESTZap978    | 241  |    | misshapen/NIK-related kinase                                          | Environmental Information Processing; Signal Transduction; MAPK signaling pathway                          |
| gSpZap536bT7   | 112  |    | mitogen and stress response kinase 1                                  | Environmental Information Processing; Signal Transduction; MAPK signaling pathway                          |
| gSpZap1011gT3  | 138  |    | mitogen-, stress activated protein kinases                            | Environmental Information Processing; Signal Transduction; MAPK signaling pathway                          |
| gSpZar938bT7   | 208  |    | mitogen-, stress activated protein kinases                            | Environmental Information Processing; Signal Transduction; MAPK signaling pathway                          |
| gSpZar494gT3   | 200  |    | mitogen-activated protein kinase kinase kinase 13                     | Environmental Information Processing; Signal Transduction; MAPK signaling pathway                          |
| gSpTor797bT7   | 132  |    | mitogen-activated protein kinase kinase kinase 2                      | Environmental Information Processing; Signal Transduction; MAPK signaling pathway                          |
| gSpTor951gT3_2 | 235  |    | mitogen-activated protein kinase kinase kinase 2                      | Environmental Information Processing; Signal Transduction; MAPK signaling pathway                          |
| gSpTor707gT3   | 162  |    | mitogen-activated protein kinase kinase kinase 9                      | Environmental Information Processing; Signal Transduction; MAPK signaling pathway                          |
| gSpZar667gT3   | 173  |    | mitogen-activated protein kinase kinase kinase kinase 1               | Environmental Information Processing; Signal Transduction; MAPK signaling pathway                          |
| gSpTor1559bT7  | 132  |    | p21-activated kinase 1                                                | Environmental Information Processing; Signal Transduction; MAPK signaling pathway                          |
| SpESTDH364     | 181  |    | p21-activated kinase 1                                                | Environmental Information Processing; Signal Transduction; MAPK signaling pathway                          |
| gSpZar828bT7   | 133  |    | p38 MAP Kinase                                                        | Environmental Information Processing; Signal Transduction; MAPK signaling pathway                          |
| gSpZar201bT7   | 146  | TM | p90 ribosomal S6 kinase                                               | Environmental Information Processing; Signal Transduction; MAPK signaling pathway                          |
| gSpZap793bT7   | 151  |    | protein kinase A                                                      | Environmental Information Processing; Signal Transduction; MAPK signaling pathway                          |
| gSpZap816gT3   | 108  |    | protein kinase A                                                      | Environmental Information Processing; Signal Transduction; MAPK signaling pathway                          |
| SpESTZap368    | 189  |    | protein kinase A                                                      | Environmental Information Processing; Signal Transduction; MAPK signaling pathway                          |
| SpESTZap819    | 188  |    | protein kinase C                                                      | Environmental Information Processing; Signal Transduction; MAPK signaling pathway                          |
| gSpZap837bT7   | 153  |    | protein phosphatase 1A (formerly 2C)                                  | Environmental Information Processing; Signal Transduction; MAPK signaling pathway                          |
| SpESTC175      | 232  |    | protein phosphatase 1A (formerly 2C)                                  | Environmental Information Processing; Signal Transduction; MAPK signaling pathway                          |
| gSpZap256gT3   | 121  |    | protein phosphatase 1B (formerly 2C)                                  | Environmental Information Processing; Signal Transduction; MAPK signaling pathway                          |
| SpESTC153      | 111  |    | protein phosphatase 1B (formerly 2C)                                  | Environmental Information Processing; Signal Transduction; MAPK signaling pathway                          |
| gSpZar560gT3   | 236  |    | protein phosphatase 5                                                 | Environmental Information Processing; Signal Transduction; MAPK signaling pathway                          |
| SpESTC209      | 215  |    | protein phosphatase 5                                                 | Environmental Information Processing; Signal Transduction; MAPK signaling pathway                          |
| SpESTC270      | 367  |    | protein phosphatase 5                                                 | Environmental Information Processing; Signal Transduction; MAPK signaling pathway                          |
| SpESTZap1875   | 214  |    | protein phosphatase 5                                                 | Environmental Information Processing; Signal Transduction; MAPK signaling pathway                          |
| SpESTZap191    | 161  |    | protein phosphatase 5                                                 | Environmental Information Processing; Signal Transduction; MAPK signaling pathway                          |
| SpESTZap54     | 225  |    | protein phosphatase 5                                                 | Environmental Information Processing; Signal Transduction; MAPK signaling pathway                          |
| gSpZar609bT7   | 149  |    | RAP1, member of RAS oncogene family                                   | Environmental Information Processing; Signal Transduction; MAPK signaling pathway                          |
| SpESTC180      | 195  |    | Rho superfamily, small GTP binding protein Rac                        | Environmental Information Processing; Signal Transduction; MAPK signaling pathway                          |
| SpESTZap52     | 208  |    | serine/threonine kinase 4                                             | Environmental Information Processing; Signal Transduction; MAPK signaling pathway                          |
| gSpZap77gT3    | 196  | C  | tumor necrosis factor receptor superfamily, member 1A                 | Environmental Information Processing; Signal Transduction; MAPK signaling pathway                          |
| gSpZap289bT7   | 105  |    | v-akt murine thymoma viral oncogene homolog                           | Environmental Information Processing; Signal Transduction; MAPK signaling pathway                          |
| gSpTor570bT7   | 222  | C  | jagged                                                                | Environmental Information Processing; Signal Transduction; Notch signaling pathway                         |
| gSpTor757bT7   | 125  | C  | Notch                                                                 | Environmental Information Processing; Signal Transduction; Notch signaling pathway                         |
| gSpTor957gT3_2 | 223  | C  | Notch                                                                 | Environmental Information Processing; Signal Transduction; Notch signaling pathway                         |
| gSpZap443bT7   | 117  | C  | Notch                                                                 | Environmental Information Processing; Signal Transduction; Notch signaling pathway                         |
| gSpZap601gT3   | 148  | C  | Notch                                                                 | Environmental Information Processing; Signal Transduction; Notch signaling pathway                         |
| gSpZar633gT3   | 210  | C  | Notch                                                                 | Environmental Information Processing; Signal Transduction; Notch signaling pathway                         |
| SpESTC104      | 226  | C  | Notch                                                                 | Environmental Information Processing; Signal Transduction; Notch signaling pathway                         |
| SpESTZap901    | 190  | C  | Notch                                                                 | Environmental Information Processing; Signal Transduction; Notch signaling pathway                         |
| gSpZap337gT3   | 175  | TM | p300/CBP-associated factor                                            | Environmental Information Processing; Signal Transduction; Notch signaling pathway                         |
| gSpZar604bT7   | 92   |    | p300/CBP-associated factor                                            | Environmental Information Processing; Signal Transduction; Notch signaling pathway                         |
| gSpTor764bT7   | 142  |    | type III PIP kinase                                                   | Environmental Information Processing; Signal Transduction; Phosphatidylinositol signaling system           |
| gSpZap650gT3   | 219  |    | casein kinase 1                                                       | Environmental Information Processing; Signal Transduction; Wnt signaling pathway                           |
| SpESTZap333    | 244  |    | casein kinase 1                                                       | Environmental Information Processing; Signal Transduction; Wnt signaling pathway                           |
| gSpTor256gT3   | 115  |    | glycogen synthase kinase 3 beta                                       | Environmental Information Processing; Signal Transduction; Wnt signaling pathway                           |
| gSpZar932bT7   | 194  |    | glycogen synthase kinase 3 beta                                       | Environmental Information Processing; Signal Transduction; Wnt signaling pathway                           |
| gSpTor88bT7    | 76   |    | protein phosphatase 2 (formerly 2A), catalytic subunit                | Environmental Information Processing; Signal Transduction; Wnt signaling pathway                           |
| gSpTor951bT7_2 | 92   |    | protein phosphatase 2 (formerly 2A), catalytic subunit                | Environmental Information Processing; Signal Transduction; Wnt signaling pathway                           |
| SpESTC129      | 194  |    | protein phosphatase 2 (formerly 2A), catalytic subunit                | Environmental Information Processing; Signal Transduction; Wnt signaling pathway                           |
| SpESTC201      | 235  |    | protein phosphatase 2 (formerly 2A), catalytic subunit                | Environmental Information Processing; Signal Transduction; Wnt signaling pathway                           |
| SpESTDH019     | 106  |    | protein phosphatase 2 (formerly 2A), catalytic subunit                | Environmental Information Processing; Signal Transduction; Wnt signaling pathway                           |

|              |     |     |                                                                      |                                                                                                                                    |
|--------------|-----|-----|----------------------------------------------------------------------|------------------------------------------------------------------------------------------------------------------------------------|
| SpESTZap135  | 130 |     | subunit<br>protein phosphatase 2 (formerly 2A), catalytic subunit    | Environmental Information Processing; Signal Transduction; Wnt signaling pathway                                                   |
| SpESTZap1619 | 220 |     | subunit<br>protein phosphatase 2 (formerly 2A), catalytic subunit    | Environmental Information Processing; Signal Transduction; Wnt signaling pathway                                                   |
| gSpZap320gT3 | 83  |     | subunit<br>protein phosphatase 2 (formerly 2A), regulatory subunit B | Environmental Information Processing; Signal Transduction; Wnt signaling pathway                                                   |
| gSpTor487bT7 | 184 |     | Rho-associated, coiled-coil containing protein kinase                | Environmental Information Processing; Signal Transduction; Wnt signaling pathway                                                   |
| SpESTC234    | 289 |     | RuvB-like protein 1 (pontin 52)                                      | Environmental Information Processing; Signal Transduction; Wnt signaling pathway                                                   |
| gSpZap222bT7 | 132 |     | hect domain ubiquitin protein ligase E3 component                    | Genetic Information Processing; Folding, Sorting and Degradation; Genetic Information Processing; Folding, Sorting and Degradation |
| gSpZap912bT7 | 91  |     | hect domain ubiquitin protein ligase E3 component                    | Genetic Information Processing; Folding, Sorting and Degradation; Genetic Information Processing; Folding, Sorting and Degradation |
| SpESTZap2092 | 172 |     | hect domain ubiquitin protein ligase E3 component                    | Genetic Information Processing; Folding, Sorting and Degradation; Genetic Information Processing; Folding, Sorting and Degradation |
| SpESTZap279  | 202 |     | 20S proteasome subunit alpha1                                        | Genetic Information Processing; Folding, Sorting and Degradation; Proteasome                                                       |
| SpESTC101    | 170 |     | 20S proteasome subunit alpha3                                        | Genetic Information Processing; Folding, Sorting and Degradation; Proteasome                                                       |
| SpESTZap1656 | 169 |     | 20S proteasome subunit alpha7                                        | Genetic Information Processing; Folding, Sorting and Degradation; Proteasome                                                       |
| gSpTor2gT3   | 100 |     | 20S proteasome subunit beta1                                         | Genetic Information Processing; Folding, Sorting and Degradation; Proteasome                                                       |
| SpESTC215    | 228 |     | 20S proteasome subunit beta5                                         | Genetic Information Processing; Folding, Sorting and Degradation; Proteasome                                                       |
| SpESTC166    | 188 |     | 20S proteasome subunit beta6                                         | Genetic Information Processing; Folding, Sorting and Degradation; Proteasome                                                       |
| SpESTZap889  | 129 |     | 20S proteasome subunit beta7                                         | Genetic Information Processing; Folding, Sorting and Degradation; Proteasome                                                       |
| SpESTC119    | 165 |     | 26S proteasome regulatory subunit N11                                | Genetic Information Processing; Folding, Sorting and Degradation; Proteasome                                                       |
| SpESTC146    | 209 |     | 26S proteasome regulatory subunit N8                                 | Genetic Information Processing; Folding, Sorting and Degradation; Proteasome                                                       |
| SpESTZap1256 | 211 |     | 26S proteasome regulatory subunit T2                                 | Genetic Information Processing; Folding, Sorting and Degradation; Proteasome                                                       |
| gSpZap532gT3 | 88  |     | 26S proteasome regulatory subunit T4                                 | Genetic Information Processing; Folding, Sorting and Degradation; Proteasome                                                       |
| SpESTC107    | 233 |     | 26S proteasome regulatory subunit T5                                 | Genetic Information Processing; Folding, Sorting and Degradation; Proteasome                                                       |
| gSpTor154bT7 | 159 |     | 26S proteasome regulatory subunit T6                                 | Genetic Information Processing; Folding, Sorting and Degradation; Proteasome                                                       |
| gSpZap115gT3 | 176 |     | proteasome alpha subunit                                             | Genetic Information Processing; Folding, Sorting and Degradation; Proteasome                                                       |
| gSpZap497gT3 | 166 |     | Mg-dependent DNase                                                   | Genetic Information Processing; Folding, Sorting and Degradation; Protein export                                                   |
| SpESTZap2118 | 155 | TM  | preprotein translocase SecY subunit                                  | Genetic Information Processing; Folding, Sorting and Degradation; Protein export                                                   |
| SpESTZap2097 | 94  |     | signal recognition particle, subunit SRP19                           | Genetic Information Processing; Folding, Sorting and Degradation; Protein export                                                   |
| gSpTor27gT3  | 139 |     | ATP-dependent Zn protease, cell division protein                     | Genetic Information Processing; Folding, Sorting and Degradation; Protein folding and associated processing                        |
| 15990567     | 512 |     | chaperonin GroEL (Hsp60)                                             | Genetic Information Processing; Folding, Sorting and Degradation; Protein folding and associated processing                        |
| gSpZar636gT3 | 130 |     | chaperonin GroEL (Hsp60)                                             | Genetic Information Processing; Folding, Sorting and Degradation; Protein folding and associated processing                        |
| SpESTC121    | 201 |     | chaperonin GroEL (Hsp60)                                             | Genetic Information Processing; Folding, Sorting and Degradation; Protein folding and associated processing                        |
| SpESTC170    | 209 |     | chaperonin GroEL (Hsp60)                                             | Genetic Information Processing; Folding, Sorting and Degradation; Protein folding and associated processing                        |
| SpESTC73     | 341 |     | chaperonin GroEL (Hsp60)                                             | Genetic Information Processing; Folding, Sorting and Degradation; Protein folding and associated processing                        |
| SpESTDH392   | 191 |     | chaperonin GroEL (Hsp60)                                             | Genetic Information Processing; Folding, Sorting and Degradation; Protein folding and associated processing                        |
| SpESTZap392  | 225 |     | chaperonin GroEL (Hsp60)                                             | Genetic Information Processing; Folding, Sorting and Degradation; Protein folding and associated processing                        |
| 23306653     | 657 |     | heat shock protein 70, Hsp70 family                                  | Genetic Information Processing; Folding, Sorting and Degradation; Protein folding and associated processing                        |
| gSpZal522bMF | 164 |     | heat shock protein 70, Hsp70 family                                  | Genetic Information Processing; Folding, Sorting and Degradation; Protein folding and associated processing                        |
| SpESTC184    | 221 |     | heat shock protein 70, Hsp70 family                                  | Genetic Information Processing; Folding, Sorting and Degradation; Protein folding and associated processing                        |
| SpESTC236    | 230 |     | heat shock protein 70, Hsp70 family                                  | Genetic Information Processing; Folding, Sorting and Degradation; Protein folding and associated processing                        |
| SpESTZap1064 | 205 |     | heat shock protein 70, Hsp70 family                                  | Genetic Information Processing; Folding, Sorting and Degradation; Protein folding and associated processing                        |
| SpESTC148    | 303 |     | Heat shock protein 90; pfam00183                                     | Genetic Information Processing; Folding, Sorting and Degradation; Protein folding and associated processing                        |
| SpESTC18     | 183 | LGT | membrane protease subunit HflK                                       | Genetic Information Processing; Folding, Sorting and Degradation; Protein folding and associated processing                        |
| gSpZar958bT7 | 125 | LGT | membrane protease subunit HflK                                       | Genetic Information Processing; Folding, Sorting and Degradation; Protein folding and associated processing                        |
| gSpZap739gT3 | 111 |     | prefoldin alpha subunit                                              | Genetic Information Processing; Folding, Sorting and Degradation; Protein folding and associated processing                        |
| SpESTC227    | 228 |     | protein disulfide-isomerase                                          | Genetic Information Processing; Folding, Sorting and Degradation; Protein folding and associated processing                        |
| SpESTC258    | 220 |     | protein disulfide-isomerase                                          | Genetic Information Processing; Folding, Sorting and Degradation; Protein folding and associated processing                        |
| SpESTZap295  | 92  |     | protein disulfide-isomerase                                          | Genetic Information Processing; Folding, Sorting and Degradation; Protein folding and associated processing                        |
| SpESTZap885  | 95  |     | protein disulfide-isomerase                                          | Genetic Information Processing; Folding, Sorting and Degradation; Protein folding and associated processing                        |
| SpESTZap970  | 223 |     | ubiquilin 1                                                          | Genetic Information Processing; Folding, Sorting and Degradation; Ubiquitin mediated proteolysis                                   |
| gSpZar929bT7 | 165 |     | ubiquitin-activating enzyme E1                                       | Genetic Information Processing; Folding, Sorting and Degradation; Ubiquitin mediated proteolysis                                   |
| gSpTor755bT7 | 81  |     | ubiquitin-conjugating enzyme                                         | Genetic Information Processing; Folding, Sorting and Degradation; Ubiquitin mediated proteolysis                                   |
| SpESTDH402   | 166 |     | ubiquitin-conjugating enzyme                                         | Genetic Information Processing; Folding, Sorting and Degradation; Ubiquitin mediated proteolysis                                   |
| SpESTZap86   | 125 |     | ubiquitin-conjugating enzyme                                         | Genetic Information Processing; Folding, Sorting and Degradation; Ubiquitin mediated proteolysis                                   |
| gSpZap808gT3 | 130 |     | ubiquitin-conjugating enzyme E2                                      | Genetic Information Processing; Folding, Sorting and Degradation; Ubiquitin mediated proteolysis                                   |
| gSpZap913gT3 | 102 |     | ubiquitin-conjugating enzyme E2                                      | Genetic Information Processing; Folding, Sorting and Degradation; Ubiquitin mediated proteolysis                                   |
| gSpTol292bMF | 186 |     | DNA polymerase                                                       | Genetic Information Processing; Replication and Repair; DNA polymerase                                                             |
| SpESTDH269   | 187 |     | DNA polymerase                                                       | Genetic Information Processing; Replication and Repair; DNA polymerase                                                             |
| gSpZap446bT7 | 163 |     | DNA polymerase alpha, subunit A                                      | Genetic Information Processing; Replication and Repair; DNA polymerase                                                             |
| gSpZap813gT3 | 197 |     | DNA polymerase delta, subunit A                                      | Genetic Information Processing; Replication and Repair; DNA polymerase                                                             |
| gSpZap553gT3 | 47  | C   | DNA polymerase IV                                                    | Genetic Information Processing; Replication and Repair; DNA polymerase                                                             |
| gSpZap842bT7 | 83  |     | ATP-dependent DNA helicase RecQ                                      | Genetic Information Processing; Replication and Repair; Other replication, recombination and repair factors                        |
| SpESTC164    | 225 |     | ATP-dependent RNA helicase DeaD                                      | Genetic Information Processing; Replication and Repair; Other replication, recombination and repair factors                        |
| SpESTZap741  | 217 |     | ATP-dependent RNA helicase DeaD                                      | Genetic Information Processing; Replication and Repair; Other replication, recombination and repair factors                        |
| gSpTor801bT7 | 152 |     | ATP-dependent RNA helicase RhlB                                      | Genetic Information Processing; Replication and Repair; Other replication, recombination and repair factors                        |
| gSpTor162gT3 | 185 |     | ATP-dependent RNA helicase SrmB                                      | Genetic Information Processing; Replication and Repair; Other replication, recombination and repair factors                        |
| SpESTZap1984 | 120 |     | ATP-independent RNA helicase DbpA                                    | Genetic Information Processing; Replication and Repair; Other replication, recombination and repair factors                        |
| SpESTC43     | 188 | LGT | DNA glycosylase                                                      | Genetic Information Processing; Replication and Repair; Other replication, recombination                                           |

|              |     |    |                                                  |                                                                                                             |
|--------------|-----|----|--------------------------------------------------|-------------------------------------------------------------------------------------------------------------|
| gSpZap869bT7 | 149 |    | DNA mismatch repair protein MutS                 | Genetic Information Processing; Replication and Repair; Other replication, recombination and repair factors |
| gSpZar426bT7 | 126 |    | DNA repair protein Rad51                         | Genetic Information Processing; Replication and Repair; Other replication, recombination and repair factors |
| SpESTDH274   | 130 |    | DNA-(apurinic or pyrimidinic site) lyase         | Genetic Information Processing; Replication and Repair; Other replication, recombination and repair factors |
| gSpZal070bMF | 156 |    | exodeoxyribonuclease I                           | Genetic Information Processing; Replication and Repair; Other replication, recombination and repair factors |
| SpESTZap438  | 181 |    | exodeoxyribonuclease III                         | Genetic Information Processing; Replication and Repair; Other replication, recombination and repair factors |
| gSpTor235gT3 | 214 |    | exonuclease SbcC                                 | Genetic Information Processing; Replication and Repair; Other replication, recombination and repair factors |
| SpESTC237    | 234 |    | exonuclease SbcC                                 | Genetic Information Processing; Replication and Repair; Other replication, recombination and repair factors |
| SpESTZap1967 | 102 |    | flap endonuclease-1                              | Genetic Information Processing; Replication and Repair; Other replication, recombination and repair factors |
| gSpTor13gT3  | 195 | TM | helicase                                         | Genetic Information Processing; Replication and Repair; Other replication, recombination and repair factors |
| gSpZar813gT3 | 226 |    | DNA topoisomerase II                             | Genetic Information Processing; Replication and Repair; Replication complex                                 |
| gSpZap319gT3 | 109 |    | transcription initiation factor TFIID subunit D4 | Genetic Information Processing; Transcription; Basal transcription factors                                  |
| gSpZap288bT7 | 167 |    | DNA-directed RNA polymerase I subunit A1         | Genetic Information Processing; Transcription; RNA polymerase                                               |
| gSpZar356gT3 | 122 |    | DNA-directed RNA polymerase I subunit A2         | Genetic Information Processing; Transcription; RNA polymerase                                               |
| gSpZal444bMF | 121 |    | DNA-directed RNA polymerase II subunit A         | Genetic Information Processing; Transcription; RNA polymerase                                               |
| gSpTor153bT7 | 222 |    | DNA-directed RNA polymerase II subunit B         | Genetic Information Processing; Transcription; RNA polymerase                                               |
| gSpTor153gT3 | 120 |    | DNA-directed RNA polymerase II subunit B         | Genetic Information Processing; Transcription; RNA polymerase                                               |
| gSpZar943bT7 | 108 |    | DNA-directed RNA polymerase II subunit J         | Genetic Information Processing; Transcription; RNA polymerase                                               |
| gSpTor141bT7 | 231 |    | DNA-directed RNA polymerase III subunit C1       | Genetic Information Processing; Transcription; RNA polymerase                                               |
| gSpTor141gT3 | 227 |    | DNA-directed RNA polymerase III subunit C1       | Genetic Information Processing; Transcription; RNA polymerase                                               |
| gSpZap239bT7 | 162 |    | DNA-directed RNA Polymerase III subunit C5       | Genetic Information Processing; Transcription; RNA polymerase                                               |
| gSpTor660gT3 | 69  |    | DNA-directed RNA polymerase subunit N            | Genetic Information Processing; Transcription; RNA polymerase                                               |
| gSpZar21gT3  | 229 |    | tRNA-dihydrouridine synthase 3                   | Genetic Information Processing; Translation; Other translation factors                                      |
| SpESTZap366  | 197 |    | tRNA-dihydrouridine synthase A                   | Genetic Information Processing; Translation; Other translation factors                                      |
| SpESTC286    | 214 |    | large subunit ribosomal protein L10Ae            | Genetic Information Processing; Translation; Ribosome                                                       |
| SpESTC287    | 204 |    | large subunit ribosomal protein L10e             | Genetic Information Processing; Translation; Ribosome                                                       |
| SpESTC303    | 169 |    | large subunit ribosomal protein L11e             | Genetic Information Processing; Translation; Ribosome                                                       |
| SpESTC283    | 177 |    | large subunit ribosomal protein L12e             | Genetic Information Processing; Translation; Ribosome                                                       |
| SpESTC296    | 191 |    | large subunit ribosomal protein L13Ae            | Genetic Information Processing; Translation; Ribosome                                                       |
| SpESTZap1021 | 192 |    | large subunit ribosomal protein L13e             | Genetic Information Processing; Translation; Ribosome                                                       |
| SpESTC250    | 124 |    | large subunit ribosomal protein L14e             | Genetic Information Processing; Translation; Ribosome                                                       |
| SpESTC302    | 201 |    | large subunit ribosomal protein L15e             | Genetic Information Processing; Translation; Ribosome                                                       |
| SpESTC229    | 162 |    | large subunit ribosomal protein L17e             | Genetic Information Processing; Translation; Ribosome                                                       |
| SpESTC187    | 167 |    | large subunit ribosomal protein L18Ae            | Genetic Information Processing; Translation; Ribosome                                                       |
| SpESTC291    | 178 |    | large subunit ribosomal protein L18e             | Genetic Information Processing; Translation; Ribosome                                                       |
| SpESTC256    | 175 |    | large subunit ribosomal protein L19e             | Genetic Information Processing; Translation; Ribosome                                                       |
| SpESTC244    | 156 |    | large subunit ribosomal protein L21e             | Genetic Information Processing; Translation; Ribosome                                                       |
| SpESTC168    | 110 |    | large subunit ribosomal protein L22e             | Genetic Information Processing; Translation; Ribosome                                                       |
| SpESTC68     | 133 |    | large subunit ribosomal protein L23e             | Genetic Information Processing; Translation; Ribosome                                                       |
| SpESTZap1971 | 126 |    | large subunit ribosomal protein L24              | Genetic Information Processing; Translation; Ribosome                                                       |
| SpESTDH056   | 95  |    | large subunit ribosomal protein L24e             | Genetic Information Processing; Translation; Ribosome                                                       |
| SpESTC15     | 145 |    | large subunit ribosomal protein L27Ae            | Genetic Information Processing; Translation; Ribosome                                                       |
| SpESTC95     | 124 |    | large subunit ribosomal protein L27e             | Genetic Information Processing; Translation; Ribosome                                                       |
| SpESTC297    | 106 |    | large subunit ribosomal protein L30e             | Genetic Information Processing; Translation; Ribosome                                                       |
| SpESTC232    | 100 |    | large subunit ribosomal protein L31e             | Genetic Information Processing; Translation; Ribosome                                                       |
| SpESTC194    | 130 |    | large subunit ribosomal protein L32e             | Genetic Information Processing; Translation; Ribosome                                                       |
| SpESTC160    | 110 |    | large subunit ribosomal protein L34e             | Genetic Information Processing; Translation; Ribosome                                                       |
| SpESTZap1267 | 89  |    | large subunit ribosomal protein L35Ae            | Genetic Information Processing; Translation; Ribosome                                                       |
| SpESTC310    | 127 |    | large subunit ribosomal protein L35e             | Genetic Information Processing; Translation; Ribosome                                                       |
| SpESTC220    | 86  |    | large subunit ribosomal protein L37Ae            | Genetic Information Processing; Translation; Ribosome                                                       |
| SpESTZap1647 | 76  |    | large subunit ribosomal protein L37e             | Genetic Information Processing; Translation; Ribosome                                                       |
| SpESTZap673  | 111 |    | large subunit ribosomal protein L3e              | Genetic Information Processing; Translation; Ribosome                                                       |
| SpESTC306    | 126 |    | large subunit ribosomal protein L40e             | Genetic Information Processing; Translation; Ribosome                                                       |
| SpESTC274    | 104 |    | large subunit ribosomal protein L44e             | Genetic Information Processing; Translation; Ribosome                                                       |
| SpESTC309    | 109 |    | large subunit ribosomal protein L44e             | Genetic Information Processing; Translation; Ribosome                                                       |
| SpESTC131    | 207 |    | large subunit ribosomal protein L4e              | Genetic Information Processing; Translation; Ribosome                                                       |
| SpESTC290    | 240 |    | large subunit ribosomal protein L5e              | Genetic Information Processing; Translation; Ribosome                                                       |
| gSpTor643gT3 | 121 |    | large subunit ribosomal protein L7Ae             | Genetic Information Processing; Translation; Ribosome                                                       |
| SpESTC314    | 227 |    | large subunit ribosomal protein L7Ae             | Genetic Information Processing; Translation; Ribosome                                                       |
| SpESTZap830  | 116 | TM | large subunit ribosomal protein L7Ae             | Genetic Information Processing; Translation; Ribosome                                                       |
| SpESTC216    | 210 |    | large subunit ribosomal protein L7e              | Genetic Information Processing; Translation; Ribosome                                                       |
| SpESTC163    | 164 |    | large subunit ribosomal protein L8e              | Genetic Information Processing; Translation; Ribosome                                                       |
| SpESTC20     | 133 |    | large subunit ribosomal protein L9e              | Genetic Information Processing; Translation; Ribosome                                                       |
| SpESTZap665  | 171 |    | large subunit ribosomal protein L9e              | Genetic Information Processing; Translation; Ribosome                                                       |
| SpESTC304    | 244 | TM | large subunit ribosomal protein LP0              | Genetic Information Processing; Translation; Ribosome                                                       |
| SpESTC205    | 103 |    | large subunit ribosomal protein LP1              | Genetic Information Processing; Translation; Ribosome                                                       |
| SpESTZap844  | 118 |    | small subunit ribosomal protein S10e             | Genetic Information Processing; Translation; Ribosome                                                       |
| SpESTC277    | 148 |    | small subunit ribosomal protein S11e             | Genetic Information Processing; Translation; Ribosome                                                       |
| SpESTZap1447 | 119 |    | small subunit ribosomal protein S12e             | Genetic Information Processing; Translation; Ribosome                                                       |
| SpESTC262    | 152 |    | small subunit ribosomal protein S13e             | Genetic Information Processing; Translation; Ribosome                                                       |
| SpESTZap1202 | 136 |    | small subunit ribosomal protein S14e             | Genetic Information Processing; Translation; Ribosome                                                       |
| SpESTC313    | 127 |    | small subunit ribosomal protein S15Ae            | Genetic Information Processing; Translation; Ribosome                                                       |
| SpESTC299    | 133 |    | small subunit ribosomal protein S16e             | Genetic Information Processing; Translation; Ribosome                                                       |
| SpESTC288    | 113 |    | small subunit ribosomal protein S17e             | Genetic Information Processing; Translation; Ribosome                                                       |
| SpESTC292    | 150 |    | small subunit ribosomal protein S18e             | Genetic Information Processing; Translation; Ribosome                                                       |
| SpESTC240    | 143 |    | small subunit ribosomal protein S19              | Genetic Information Processing; Translation; Ribosome                                                       |
| SpESTC183    | 131 |    | small subunit ribosomal protein S19e             | Genetic Information Processing; Translation; Ribosome                                                       |
| SpESTZap828  | 107 |    | small subunit ribosomal protein S20e             | Genetic Information Processing; Translation; Ribosome                                                       |
| SpESTDH098   | 74  |    | small subunit ribosomal protein S21e             | Genetic Information Processing; Translation; Ribosome                                                       |
| SpESTC294    | 139 |    | small subunit ribosomal protein S23e             | Genetic Information Processing; Translation; Ribosome                                                       |
| SpESTC241    | 126 |    | small subunit ribosomal protein S24e             | Genetic Information Processing; Translation; Ribosome                                                       |
| SpESTC211    | 91  |    | small subunit ribosomal protein S25e             | Genetic Information Processing; Translation; Ribosome                                                       |
| SpESTC264    | 100 |    | small subunit ribosomal protein S26e             | Genetic Information Processing; Translation; Ribosome                                                       |
| SpESTC218    | 130 |    | small subunit ribosomal protein S27Ae            | Genetic Information Processing; Translation; Ribosome                                                       |
| SpESTC224    | 77  |    | small subunit ribosomal protein S27e             | Genetic Information Processing; Translation; Ribosome                                                       |
| SpESTC193    | 63  |    | small subunit ribosomal protein S28e             | Genetic Information Processing; Translation; Ribosome                                                       |
| SpESTC62     | 47  | C  | small subunit ribosomal protein S29e             | Genetic Information Processing; Translation; Ribosome                                                       |
| SpESTC279    | 230 |    | small subunit ribosomal protein S2e              | Genetic Information Processing; Translation; Ribosome                                                       |
| SpESTZap358  | 74  |    | small subunit ribosomal protein S30e             | Genetic Information Processing; Translation; Ribosome                                                       |
| SpESTC284    | 240 |    | small subunit ribosomal protein S3Ae             | Genetic Information Processing; Translation; Ribosome                                                       |
| SpESTC308    | 204 |    | small subunit ribosomal protein S3e              | Genetic Information Processing; Translation; Ribosome                                                       |
| SpESTC255    | 210 |    | small subunit ribosomal protein S4e              | Genetic Information Processing; Translation; Ribosome                                                       |
| SpESTC298    | 188 |    | small subunit ribosomal protein S5e              | Genetic Information Processing; Translation; Ribosome                                                       |
| SpESTC272    | 225 |    | small subunit ribosomal protein S6e              | Genetic Information Processing; Translation; Ribosome                                                       |
| SpESTDH084   | 138 |    | small subunit ribosomal protein S7e              | Genetic Information Processing; Translation; Ribosome                                                       |
| SpESTC278    | 167 |    | small subunit ribosomal protein S8e              | Genetic Information Processing; Translation; Ribosome                                                       |
| SpESTC261    | 165 |    | small subunit ribosomal protein S9e              | Genetic Information Processing; Translation; Ribosome                                                       |
| SpESTC311    | 224 |    | small subunit ribosomal protein S9e              | Genetic Information Processing; Translation; Ribosome                                                       |

|                |     |     |                                                                                  |                                                                                        |
|----------------|-----|-----|----------------------------------------------------------------------------------|----------------------------------------------------------------------------------------|
| gSpTor722bT7   | 143 |     | elongation factor EF-1 alpha subunit                                             | Genetic Information Processing; Translation; Translation factors                       |
| gSpZar859bT7   | 68  |     | elongation factor EF-1 alpha subunit                                             | Genetic Information Processing; Translation; Translation factors                       |
| SpESTC305      | 435 |     | elongation factor EF-1 alpha subunit                                             | Genetic Information Processing; Translation; Translation factors                       |
| SpESTZap1479   | 234 |     | elongation factor EF-1 alpha subunit                                             | Genetic Information Processing; Translation; Translation factors                       |
| 32B16837       | 224 |     | elongation factor EF-1 beta subunit                                              | Genetic Information Processing; Translation; Translation factors                       |
| SpESTDH009     | 104 |     | elongation factor EF-2                                                           | Genetic Information Processing; Translation; Translation factors                       |
| gSpZap36gT3    | 148 |     | peptide chain release factor eRF subunit 1                                       | Genetic Information Processing; Translation; Translation factors                       |
| SpESTZap940    | 218 |     | translation initiation factor eIF-2 beta subunit                                 | Genetic Information Processing; Translation; Translation factors                       |
| gSpZap92bT7    | 179 |     | translation initiation factor eIF-2 gamma subunit                                | Genetic Information Processing; Translation; Translation factors                       |
| gSpTor822bT7_2 | 220 |     | translation initiation factor eIF-2B epsilon subunit                             | Genetic Information Processing; Translation; Translation factors                       |
| SpESTC57       | 185 |     | translation initiation factor eIF-3 subunit 2                                    | Genetic Information Processing; Translation; Translation factors                       |
| gSpTor973gT3   | 105 |     | translation initiation factor eIF-4A                                             | Genetic Information Processing; Translation; Translation factors                       |
| gSpZap278bT7   | 141 |     | translation initiation factor eIF-4A                                             | Genetic Information Processing; Translation; Translation factors                       |
| gSpZap373gT3   | 191 |     | translation initiation factor eIF-4A                                             | Genetic Information Processing; Translation; Translation factors                       |
| SpESTC84       | 235 |     | translation initiation factor eIF-4A                                             | Genetic Information Processing; Translation; Translation factors                       |
| SpESTZap768    | 228 |     | translation initiation factor eIF-4A                                             | Genetic Information Processing; Translation; Translation factors                       |
| SpESTC301      | 148 |     | translation initiation factor eIF-5A                                             | Genetic Information Processing; Translation; Translation factors                       |
| gSpZap490gT3   | 91  |     | translation initiation factor eIF-6                                              | Genetic Information Processing; Translation; Translation factors                       |
| gSpTor308bT7   | 168 |     | translation initiation factor IF-2                                               | Genetic Information Processing; Translation; Translation factors                       |
| gSpTor587gT3   | 239 |     | translation initiation factor IF-2 unclassified subunit                          | Genetic Information Processing; Translation; Translation factors                       |
| gSpZap790gT3   | 160 |     | CCTbeta                                                                          | Genetic Information Processing; unclassified                                           |
| SpESTZap1495   | 230 |     | CCTtheta                                                                         | Genetic Information Processing; unclassified                                           |
| gSpZar107bT7   | 111 |     | clathrin                                                                         | Genetic Information Processing; unclassified                                           |
| 34148554       | 326 |     | coatamer-like protein beta subunit                                               | Genetic Information Processing; unclassified                                           |
| SpESTZap1250   | 145 |     | exoribonuclease                                                                  | Genetic Information Processing; unclassified                                           |
| gSpTor1287bT7  | 135 |     | N2,N2-dimethylguanosine tRNA methyltransferase                                   | Genetic Information Processing; unclassified                                           |
| gSpZap780gT3   | 136 |     | Ribosomal RNA adenine dimethylase                                                | Genetic Information Processing; unclassified                                           |
| gSpTor397gT3   | 214 |     | snoRNA binding protein                                                           | Genetic Information Processing; unclassified                                           |
| SpESTZap1982   | 222 |     | snoRNA binding protein                                                           | Genetic Information Processing; unclassified                                           |
| SpESTZap276    | 247 | TM  | sulfurase                                                                        | Genetic Information Processing; unclassified                                           |
| SpESTZap1340   | 107 | LGT | tRNA (5-methylaminomethyl-2-thiouridylate) - methyltransferase                   | Genetic Information Processing; unclassified                                           |
| 34148556       | 174 |     | vacuolar protein sorting 26-like                                                 | Genetic Information Processing; unclassified                                           |
| 27982008       | 623 | LGT | alanyl-tRNA synthetase                                                           | Metabolism; Amino Acid Metabolism; Alanine and aspartate Metabolism                    |
| SpESTDH287     | 214 | LGT | aminoacylhistidine dipeptidase                                                   | Metabolism; Amino Acid Metabolism; Alanine and aspartate Metabolism                    |
| SpESTZap149    | 259 | LGT | aminoacylhistidine dipeptidase                                                   | Metabolism; Amino Acid Metabolism; Alanine and aspartate Metabolism                    |
| SpESTC149      | 412 | LGT | aminoacylhistidine dipeptidase                                                   | Metabolism; Amino Acid Metabolism; Alanine and aspartate Metabolism                    |
| SpESTC143      | 444 |     | asparaginyl-tRNA synthetase                                                      | Metabolism; Amino Acid Metabolism; Alanine and aspartate Metabolism                    |
| SpESTC26       | 192 |     | aspartyl-tRNA synthetase                                                         | Metabolism; Amino Acid Metabolism; Alanine and aspartate Metabolism                    |
| SpESTC31       | 172 | LGT | 5'-methylthioadenosine nucleosidase                                              | Metabolism; Amino Acid Metabolism; Arginine and proline Metabolism                     |
| SpESTC83       | 385 | LGT | arginine deiminase                                                               | Metabolism; Amino Acid Metabolism; Arginine and proline Metabolism                     |
| SpESTC221      | 314 | LGT | ornithine carbamoyltransferase                                                   | Metabolism; Amino Acid Metabolism; Arginine and proline Metabolism                     |
| gSpZar652bT7   | 94  |     | ornithine decarboxylase                                                          | Metabolism; Amino Acid Metabolism; Arginine and proline Metabolism                     |
| 27981826       | 299 | LGT | prolyl-tRNA synthetase                                                           | Metabolism; Amino Acid Metabolism; Arginine and proline Metabolism                     |
| gSpTol076bMF   | 117 |     | cysteinylyl-tRNA synthetase                                                      | Metabolism; Amino Acid Metabolism; Cysteine Metabolism                                 |
| gSpTor417bT7   | 243 |     | glutaminylyl-tRNA synthetase                                                     | Metabolism; Amino Acid Metabolism; Glutamate Metabolism                                |
| SpESTDH021     | 95  |     | glycyl-tRNA synthetase, class II                                                 | Metabolism; Amino Acid Metabolism; Glycine, serine and threonine Metabolism            |
| gSpZap391gT3   | 101 | TM  | L-serine dehydratase                                                             | Metabolism; Amino Acid Metabolism; Glycine, serine and threonine Metabolism            |
| gSpZar602gT3   | 218 | LGT | sarcosine oxidase                                                                | Metabolism; Amino Acid Metabolism; Glycine, serine and threonine Metabolism            |
| gSpZap30gT3    | 172 | LGT | sarcosine oxidase                                                                | Metabolism; Amino Acid Metabolism; Glycine, serine and threonine Metabolism            |
| gSpZar953bT7   | 62  |     | sarcosine oxidase                                                                | Metabolism; Amino Acid Metabolism; Glycine, serine and threonine Metabolism            |
| gSpZar496gT3   | 78  |     | seryl-tRNA synthetase                                                            | Metabolism; Amino Acid Metabolism; Glycine, serine and threonine Metabolism            |
| SpESTDH141     | 104 |     | seryl-tRNA synthetase                                                            | Metabolism; Amino Acid Metabolism; Glycine, serine and threonine Metabolism            |
| 27982357       | 303 | LGT | threonine dehydratase                                                            | Metabolism; Amino Acid Metabolism; Glycine, serine and threonine Metabolism            |
| gSpTor190gT3   | 223 |     | threonyl-tRNA synthetase                                                         | Metabolism; Amino Acid Metabolism; Glycine, serine and threonine Metabolism            |
| SpESTZap946    | 122 | LGT | histidinol-phosphatase (PHP family)                                              | Metabolism; Amino Acid Metabolism; Histidine Metabolism                                |
| gSpZap859bT7   | 183 |     | histidyl-tRNA synthetase                                                         | Metabolism; Amino Acid Metabolism; Histidine Metabolism                                |
| gSpZar416gT3   | 174 |     | histidyl-tRNA synthetase                                                         | Metabolism; Amino Acid Metabolism; Histidine Metabolism                                |
| gSpZap345gT3   | 178 |     | lysyl-tRNA synthetase, class II                                                  | Metabolism; Amino Acid Metabolism; Lysine biosynthesis                                 |
| SpESTC19       | 205 |     | lysyl-tRNA synthetase, class II                                                  | Metabolism; Amino Acid Metabolism; Lysine biosynthesis                                 |
| Sp7orf3        | 480 |     | histone-lysine N-methyltransferase                                               | Metabolism; Amino Acid Metabolism; Lysine degradation                                  |
| gSpZap292gT3   | 159 | TM  | methionyl-tRNA synthetase                                                        | Metabolism; Amino Acid Metabolism; Methionine Metabolism                               |
| SpESTZap947    | 94  |     | methionyl-tRNA synthetase                                                        | Metabolism; Amino Acid Metabolism; Methionine Metabolism                               |
| SpESTZap902    | 196 |     | tyrosyl-tRNA synthetase                                                          | Metabolism; Amino Acid Metabolism; Phenylalanine, tyrosine and tryptophan biosynthesis |
| gSpZar1005bT7  | 100 |     | tryptophanyl-tRNA synthetase                                                     | Metabolism; Amino Acid Metabolism; Tryptophan Metabolism                               |
| SpESTZap1526   | 182 |     | tryptophanyl-tRNA synthetase                                                     | Metabolism; Amino Acid Metabolism; Tryptophan Metabolism                               |
| SpESTC86       | 198 |     | alanine aminotransferase - aspartate/tyrosine/aromatic aminotransferase; COG0436 | Metabolism; Amino Acid Metabolism; unclassified                                        |
| gSpTor628bT7   | 200 |     | isoleucyl-tRNA synthetase                                                        | Metabolism; Amino Acid Metabolism; Valine, leucine and isoleucine biosynthesis         |
| SpESTZap2033   | 183 |     | leucyl-tRNA synthetase                                                           | Metabolism; Amino Acid Metabolism; Valine, leucine and isoleucine biosynthesis         |
| 27982171       | 352 |     | branched-chain amino acid aminotransferase                                       | Metabolism; Amino Acid Metabolism; Valine, leucine and isoleucine degradation          |
| gSpZar678bT7   | 154 |     | branched-chain amino acid aminotransferase                                       | Metabolism; Amino Acid Metabolism; Valine, leucine and isoleucine degradation          |
| 27982840       | 124 |     | glucosamine-6-phosphate isomerase                                                | Metabolism; Carbohydrate Metabolism; Aminosugars Metabolism                            |
| 27983037       | 234 |     | glucosamine-6-phosphate isomerase                                                | Metabolism; Carbohydrate Metabolism; Aminosugars Metabolism                            |
| gSpTor1448bT7  | 117 |     | glucosamine-6-phosphate isomerase                                                | Metabolism; Carbohydrate Metabolism; Aminosugars Metabolism                            |
| SpESTZap1594   | 245 |     | N-acetylglucosamine kinase                                                       | Metabolism; Carbohydrate Metabolism; Aminosugars Metabolism                            |
| gSpZar522gT3   | 149 |     | UDP-N-acetylglucosamine pyrophosphorylase                                        | Metabolism; Carbohydrate Metabolism; Aminosugars Metabolism                            |
| gSpZal255bMF   | 77  |     | malate dehydrogenase                                                             | Metabolism; Carbohydrate Metabolism; Citrate cycle (TCA cycle)                         |
| gSpZar147bT7   | 45  |     | malate dehydrogenase                                                             | Metabolism; Carbohydrate Metabolism; Citrate cycle (TCA cycle)                         |
| SpESTC228      | 228 |     | malate dehydrogenase                                                             | Metabolism; Carbohydrate Metabolism; Citrate cycle (TCA cycle)                         |
| gSpZap180bT7   | 113 |     | phosphomannomutase                                                               | Metabolism; Carbohydrate Metabolism; Fructose and mannose Metabolism                   |
| SpESTZap1908   | 224 |     | Phosphomannomutase; pfam02878, COG1109                                           | Metabolism; Carbohydrate Metabolism; Fructose and mannose Metabolism                   |
| gSpZap60gT3    | 212 |     | pyrophosphate-fructose-6-phosphate 1-phosphotransferase                          | Metabolism; Carbohydrate Metabolism; Fructose and mannose Metabolism                   |
| gSpZap424gT3   | 180 |     | beta-galactosidase                                                               | Metabolism; Carbohydrate Metabolism; Galactose Metabolism                              |
| SpESTZap1666   | 216 |     | beta-galactosidase                                                               | Metabolism; Carbohydrate Metabolism; Galactose Metabolism                              |
| gSpTor1113bT7  | 47  |     | UDP-glucose 4-epimerase                                                          | Metabolism; Carbohydrate Metabolism; Galactose Metabolism                              |
| Sp7orf2        | 306 |     | UDP-glucose 4-epimerase                                                          | Metabolism; Carbohydrate Metabolism; Galactose Metabolism                              |
| SpESTZap1567   | 240 |     | acetyl-CoA synthetase                                                            | Metabolism; Carbohydrate Metabolism; Glycolysis / Gluconeogenesis                      |
| 27983189       | 880 | LGT | alcohol dehydrogenase                                                            | Metabolism; Carbohydrate Metabolism; Glycolysis / Gluconeogenesis                      |
| 27983404       | 397 | LGT | alcohol dehydrogenase                                                            | Metabolism; Carbohydrate Metabolism; Glycolysis / Gluconeogenesis                      |
| SpESTDH325     | 235 | LGT | alcohol dehydrogenase                                                            | Metabolism; Carbohydrate Metabolism; Glycolysis / Gluconeogenesis                      |
| SpESTZap588    | 229 | LGT | alcohol dehydrogenase                                                            | Metabolism; Carbohydrate Metabolism; Glycolysis / Gluconeogenesis                      |
| gSpZap84gT3    | 122 | LGT | alcohol dehydrogenase                                                            | Metabolism; Carbohydrate Metabolism; Glycolysis / Gluconeogenesis                      |
| SpESTZap1364   | 88  |     | alcohol dehydrogenase (NADP+)                                                    | Metabolism; Carbohydrate Metabolism; Glycolysis / Gluconeogenesis                      |
| SpESTZap998    | 152 |     | aldose 1-epimerase                                                               | Metabolism; Carbohydrate Metabolism; Glycolysis / Gluconeogenesis                      |
| SpESTC268      | 226 |     | enolase                                                                          | Metabolism; Carbohydrate Metabolism; Glycolysis / Gluconeogenesis                      |
| 23266714       | 327 | LGT | fructose-bisphosphate aldolase, class II                                         | Metabolism; Carbohydrate Metabolism; Glycolysis / Gluconeogenesis                      |
| SpESTZap404    | 235 | LGT | glucokinase                                                                      | Metabolism; Carbohydrate Metabolism; Glycolysis / Gluconeogenesis                      |
| 18030018       | 507 | LGT | glucose-6-phosphate isomerase                                                    | Metabolism; Carbohydrate Metabolism; Glycolysis / Gluconeogenesis                      |
| 1263024        | 297 |     | glyceraldehyde 3-phosphate dehydrogenase                                         | Metabolism; Carbohydrate Metabolism; Glycolysis / Gluconeogenesis                      |
| SpESTC202      | 258 |     | phosphoglycerate kinase                                                          | Metabolism; Carbohydrate Metabolism; Glycolysis / Gluconeogenesis                      |
| gSpTol047bMF   | 193 | LGT | phosphoglycerate mutase                                                          | Metabolism; Carbohydrate Metabolism; Glycolysis / Gluconeogenesis                      |
| SpESTC266      | 339 |     | phosphoglycerate mutase                                                          | Metabolism; Carbohydrate Metabolism; Glycolysis / Gluconeogenesis                      |

|               |      |     |                                                                                   |                                                                                          |
|---------------|------|-----|-----------------------------------------------------------------------------------|------------------------------------------------------------------------------------------|
| SpESTC275     | 213  | LGT | pyruvate kinase                                                                   | Metabolism; Carbohydrate Metabolism; Glycolysis / Gluconeogenesis                        |
| gSpTor696gT3  | 153  |     | hydrogenase                                                                       | Metabolism; Carbohydrate Metabolism; Glyoxylate and dicarboxylate Metabolism             |
| gSpTor983gT3  | 146  | LGT | phosphoglycolate phosphatase                                                      | Metabolism; Carbohydrate Metabolism; Glyoxylate and dicarboxylate Metabolism             |
| gSpTor707bT7  | 144  |     | phosphatidylinositol 3-kinase                                                     | Metabolism; Carbohydrate Metabolism; Inositol phosphate Metabolism                       |
| gSpZap388gT3  | 197  |     | phosphatidylinositol 4-kinase                                                     | Metabolism; Carbohydrate Metabolism; Inositol phosphate Metabolism                       |
| SpESTC177     | 187  |     | type I PIP kinase                                                                 | Metabolism; Carbohydrate Metabolism; Inositol phosphate Metabolism                       |
| SpESTC118     | 236  |     | dTDP-glucose 4,6-dehydratase                                                      | Metabolism; Carbohydrate Metabolism; Nucleotide sugars Metabolism                        |
| SpESTZap89    | 232  |     | aldehyde reductase                                                                | Metabolism; Carbohydrate Metabolism; Pentose and glucuronate interconversions            |
| gSpTor589bT7  | 122  |     | L-arabinose isomerase                                                             | Metabolism; Carbohydrate Metabolism; Pentose and glucuronate interconversions            |
| SpESTZap1761  | 186  |     | UTP--glucose-1-phosphate uridylyltransferase                                      | Metabolism; Carbohydrate Metabolism; Pentose and glucuronate interconversions            |
| 27982678      | 138  |     | deoxyribose-phosphate aldolase                                                    | Metabolism; Carbohydrate Metabolism; Pentose phosphate pathway                           |
| SpESTDH419    | 204  |     | ribokinase                                                                        | Metabolism; Carbohydrate Metabolism; Pentose phosphate pathway                           |
| SpESTC23      | 142  | LGT | ribose 5-phosphate isomerase B                                                    | Metabolism; Carbohydrate Metabolism; Pentose phosphate pathway                           |
| SpESTC198     | 341  |     | ribose-phosphate pyrophosphokinase                                                | Metabolism; Carbohydrate Metabolism; Pentose phosphate pathway                           |
| SpESTZap360   | 197  | LGT | transketolase                                                                     | Metabolism; Carbohydrate Metabolism; Pentose phosphate pathway                           |
| gSpZal591bMF  | 58   |     | acetyl-CoA carboxylase carboxyl transferase subunit alpha                         | Metabolism; Carbohydrate Metabolism; Pyruvate Metabolism                                 |
| gSpZap797bT7  | 131  | LGT | acetyl-CoA synthetase (ADP-forming)                                               | Metabolism; Carbohydrate Metabolism; Pyruvate Metabolism                                 |
| gSpZap472bT7  | 164  | LGT | hydroxyacylglutathione hydrolase                                                  | Metabolism; Carbohydrate Metabolism; Pyruvate Metabolism                                 |
| SpESTZap1028  | 202  | LGT | hydroxyacylglutathione hydrolase                                                  | Metabolism; Carbohydrate Metabolism; Pyruvate Metabolism                                 |
| SpESTZap934   | 199  |     | lactoylglutathione lyase                                                          | Metabolism; Carbohydrate Metabolism; Pyruvate Metabolism                                 |
| gSpZap625gT3  | 181  | TM  | malate dehydrogenase (oxaloacetate-decarboxylating)                               | Metabolism; Carbohydrate Metabolism; Pyruvate Metabolism                                 |
| 5911348       | 1182 |     | putative pyruvate-flavodoxin oxidoreductase                                       | Metabolism; Carbohydrate Metabolism; Pyruvate Metabolism                                 |
| gSpTor106bT7  | 281  |     | putative pyruvate-flavodoxin oxidoreductase                                       | Metabolism; Carbohydrate Metabolism; Pyruvate Metabolism                                 |
| gSpTor106gT3  | 211  |     | putative pyruvate-flavodoxin oxidoreductase                                       | Metabolism; Carbohydrate Metabolism; Pyruvate Metabolism                                 |
| gSpTor1241bT7 | 130  |     | putative pyruvate-flavodoxin oxidoreductase                                       | Metabolism; Carbohydrate Metabolism; Pyruvate Metabolism                                 |
| SpESTC94      | 190  | LGT | putative pyruvate-flavodoxin oxidoreductase                                       | Metabolism; Carbohydrate Metabolism; Pyruvate Metabolism                                 |
| SpESTZap870   | 181  |     | putative pyruvate-flavodoxin oxidoreductase                                       | Metabolism; Carbohydrate Metabolism; Pyruvate Metabolism                                 |
| gSpZar1013gT3 | 238  |     | 1,4-alpha-glucan branching enzyme                                                 | Metabolism; Carbohydrate Metabolism; Starch and sucrose Metabolism                       |
| gSpZar359gT3  | 151  |     | 4-alpha-glucanotransferase                                                        | Metabolism; Carbohydrate Metabolism; Starch and sucrose Metabolism                       |
| gSpZal497bMF  | 122  |     | beta-phosphoglucomutase                                                           | Metabolism; Carbohydrate Metabolism; Starch and sucrose Metabolism                       |
| gSpZap573bT7  | 140  |     | beta-phosphoglucomutase                                                           | Metabolism; Carbohydrate Metabolism; Starch and sucrose Metabolism                       |
| SpESTC136     | 183  |     | beta-phosphoglucomutase                                                           | Metabolism; Carbohydrate Metabolism; Starch and sucrose Metabolism                       |
| gSpZap510gT3  | 134  | LGT | glycogen(starch) synthase                                                         | Metabolism; Carbohydrate Metabolism; Starch and sucrose Metabolism                       |
| SpESTDH093    | 134  |     | glycogen(starch) synthase                                                         | Metabolism; Carbohydrate Metabolism; Starch and sucrose Metabolism                       |
| gSpTor1138gT3 | 97   |     | starch phosphorylase                                                              | Metabolism; Carbohydrate Metabolism; Starch and sucrose Metabolism                       |
| gSpZap151gT3  | 78   |     | starch phosphorylase                                                              | Metabolism; Carbohydrate Metabolism; Starch and sucrose Metabolism                       |
| SpESTC145     | 175  | TM  | V-type H+-transporting ATPase 16kDa proteolipid subunit                           | Metabolism; Energy Metabolism; ATP synthesis                                             |
| SpESTC212     | 171  | TM  | V-type H+-transporting ATPase 16kDa proteolipid subunit                           | Metabolism; Energy Metabolism; ATP synthesis                                             |
| SpESTC245     | 173  | TM  | V-type H+-transporting ATPase 16kDa proteolipid subunit                           | Metabolism; Energy Metabolism; ATP synthesis                                             |
| SpESTC248     | 199  | TM  | V-type H+-transporting ATPase 21kDa proteolipid subunit                           | Metabolism; Energy Metabolism; ATP synthesis                                             |
| SpESTC247     | 488  |     | V-type H+-transporting ATPase subunit A                                           | Metabolism; Energy Metabolism; ATP synthesis                                             |
| SpESTC79      | 212  |     | V-type H+-transporting ATPase subunit AC39                                        | Metabolism; Energy Metabolism; ATP synthesis                                             |
| gSpTor19gT3   | 163  |     | V-type H+-transporting ATPase subunit B                                           | Metabolism; Energy Metabolism; ATP synthesis                                             |
| SpESTC71      | 99   |     | V-type H+-transporting ATPase subunit G                                           | Metabolism; Energy Metabolism; ATP synthesis                                             |
| SpESTC113     | 198  |     | aspartate aminotransferase                                                        | Metabolism; Energy Metabolism; Carbon fixation                                           |
| 30692540      | 200  |     | peroxidase                                                                        | Metabolism; Energy Metabolism; Methane Metabolism                                        |
| SpESTC281     | 196  |     | peroxidase                                                                        | Metabolism; Energy Metabolism; Methane Metabolism                                        |
| SpESTC239     | 273  | LGT | carbamate kinase                                                                  | Metabolism; Energy Metabolism; Nitrogen Metabolism                                       |
| gSpZap126bT7  | 170  | LGT | cystathionine beta-lyase                                                          | Metabolism; Energy Metabolism; Nitrogen Metabolism                                       |
| gSpZap126gT3  | 185  | LGT | cystathionine beta-lyase                                                          | Metabolism; Energy Metabolism; Nitrogen Metabolism                                       |
| SpESTC259     | 128  | LGT | cytochrome c biogenesis protein CcmG, thiol:disulfide interchange protein DsbE    | Metabolism; Energy Metabolism; Nitrogen Metabolism                                       |
| 32480570      | 446  |     | glutamate dehydrogenase (NADP+)                                                   | Metabolism; Energy Metabolism; Nitrogen Metabolism                                       |
| 20530910      | 634  | LGT | glutamate synthase (NADPH) small chain                                            | Metabolism; Energy Metabolism; Nitrogen Metabolism                                       |
| 27983817      | 477  | LGT | hydroxylamine reductase                                                           | Metabolism; Energy Metabolism; Nitrogen Metabolism                                       |
| gSpTor500gT3  | 90   |     | L-asparaginase                                                                    | Metabolism; Energy Metabolism; Nitrogen Metabolism                                       |
| gSpTol313bMF  | 193  | LGT | tryptophanase                                                                     | Metabolism; Energy Metabolism; Nitrogen Metabolism                                       |
| SpESTC204     | 242  | LGT | tryptophanase                                                                     | Metabolism; Energy Metabolism; Nitrogen Metabolism                                       |
| gSpTor227bT7  | 219  | TM  | H+/K+-exchanging ATPase                                                           | Metabolism; Energy Metabolism; Oxidative phosphorylation                                 |
| gSpTor604bT7  | 217  | TM  | H+/K+-exchanging ATPase                                                           | Metabolism; Energy Metabolism; Oxidative phosphorylation                                 |
| gSpZap62bT7   | 197  | TM  | H+/K+-exchanging ATPase                                                           | Metabolism; Energy Metabolism; Oxidative phosphorylation                                 |
| gSpZap8gT3    | 190  |     | H+/K+-exchanging ATPase                                                           | Metabolism; Energy Metabolism; Oxidative phosphorylation                                 |
| gSpTor671gT3  | 191  |     | NADH dehydrogenase                                                                | Metabolism; Energy Metabolism; Oxidative phosphorylation                                 |
| gSpZal229bMF  | 105  | LGT | NADH dehydrogenase                                                                | Metabolism; Energy Metabolism; Oxidative phosphorylation                                 |
| SpESTC219     | 319  | LGT | NADH dehydrogenase                                                                | Metabolism; Energy Metabolism; Oxidative phosphorylation                                 |
| SpESTDH113    | 217  | LGT | NADH dehydrogenase                                                                | Metabolism; Energy Metabolism; Oxidative phosphorylation                                 |
| 11127702      | 467  | LGT | NADH dehydrogenase                                                                | Metabolism; Energy Metabolism; Oxidative phosphorylation                                 |
| gSpTor1143gT3 | 172  | LGT | NADH dehydrogenase                                                                | Metabolism; Energy Metabolism; Oxidative phosphorylation                                 |
| SpESTC115     | 206  | LGT | cysteine synthase                                                                 | Metabolism; Energy Metabolism; Sulfur Metabolism                                         |
| SpESTZap1933  | 223  | TM  | LGT cysteine synthase                                                             | Metabolism; Energy Metabolism; Sulfur Metabolism                                         |
| SpESTC190     | 144  |     | sulfite reductase, alpha subunit (flavoprotein); COG0369                          | Metabolism; Energy Metabolism; Sulfur Metabolism                                         |
| SpESTC233     | 146  |     | sulfite reductase (NADPH) flavoprotein alpha-component                            | Metabolism; Energy Metabolism; Sulfur Metabolism                                         |
| gSpZar995gT3  | 136  |     | Acyl-CoA-dependent ceramide synthase                                              | Metabolism; Glycan Biosynthesis and Metabolism; Glycosphingolipid Metabolism             |
| Sp3orf8       | 381  | TM  | UDP-N-acetylglucosamine--dolichyl-phosphate-N-acetylglucosaminophosphotransferase | Metabolism; Glycan Biosynthesis and Metabolism; N-Glycan                                 |
| gSpTol251bMF  | 131  |     | dolichyl-diphosphooligosaccharide--protein glycosyltransferase                    | Metabolism; Glycan Biosynthesis and Metabolism; N-Glycan biosynthesis                    |
| gSpZap856bT7  | 149  |     | neuraminidase                                                                     | Metabolism; Glycan Biosynthesis and Metabolism; N-Glycan degradation                     |
| gSpZap856gT3  | 156  |     | neuraminidase                                                                     | Metabolism; Glycan Biosynthesis and Metabolism; N-Glycan degradation                     |
| gSpZap471gT3  | 148  | LGT | fatty acid desaturase                                                             | Metabolism; Lipid Metabolism; Androgen and estrogen Metabolism                           |
| SpESTC37      | 216  | TM  | 3-oxo-5alpha-steroid 4-dehydrogenase                                              | Metabolism; Lipid Metabolism; Bile acid biosynthesis                                     |
| SpESTZap110   | 165  | LGT | NAD(P)H dehydrogenase (quinone)                                                   | Metabolism; Lipid Metabolism; Biosynthesis of steroids                                   |
| 27983595      | 710  | LGT | long-chain fatty-acid-CoA ligase                                                  | Metabolism; Lipid Metabolism; Fatty acid Metabolism                                      |
| gSpTor1293bT7 | 153  |     | long-chain fatty-acid-CoA ligase                                                  | Metabolism; Lipid Metabolism; Fatty acid Metabolism                                      |
| gSpTor244bT7  | 159  |     | long-chain fatty-acid-CoA ligase                                                  | Metabolism; Lipid Metabolism; Fatty acid Metabolism                                      |
| gSpZap134gT3  | 129  |     | long-chain fatty-acid-CoA ligase                                                  | Metabolism; Lipid Metabolism; Fatty acid Metabolism                                      |
| gSpZar537gT3  | 134  |     | long-chain fatty-acid-CoA ligase                                                  | Metabolism; Lipid Metabolism; Fatty acid Metabolism                                      |
| gSpTor97gT3   | 134  |     | glycerol kinase                                                                   | Metabolism; Lipid Metabolism; Glycerolipid Metabolism                                    |
| SpESTZap1131  | 164  |     | triacylglycerol lipase                                                            | Metabolism; Lipid Metabolism; Glycerolipid Metabolism                                    |
| gSpTor1417bT7 | 149  | TM  | CDP-diacylglycerol--glycerol-3-phosphate 3-phosphatidyltransferase                | Metabolism; Lipid Metabolism; Glycerophospholipid Metabolism                             |
| SpESTZap2148  | 243  | LGT | glycerol-3-phosphate dehydrogenase                                                | Metabolism; Lipid Metabolism; Glycerophospholipid Metabolism                             |
| SpESTZap1753  | 205  |     | phosphatidylserine decarboxylase; pfam02666.                                      | Metabolism; Lipid Metabolism; Glycerophospholipid Metabolism                             |
| gSpTor927gT3  | 196  | TM  | LGT phosphatidylserine synthase                                                   | Metabolism; Lipid Metabolism; Glycerophospholipid Metabolism                             |
| SpESTC27      | 297  |     | NAD diphosphatase                                                                 | Metabolism; Metabolism of Cofactors and Vitamins; Nicotinate and nicotinamide Metabolism |
| SpESTZap1290  | 183  |     | pantothenate kinase                                                               | Metabolism; Metabolism of Cofactors and Vitamins; Pantothenate and CoA biosynthesis      |

|                 |     |   |     |                                                                   |                                                                                     |
|-----------------|-----|---|-----|-------------------------------------------------------------------|-------------------------------------------------------------------------------------|
| Sp8orf2         | 518 |   |     | phosphopantothenoylcysteine decarboxylase                         | Metabolism; Metabolism of Cofactors and Vitamins; Pantothenate and CoA biosynthesis |
| SpESTDH423      | 105 |   |     | riboflavin kinase                                                 | Metabolism; Metabolism of Cofactors and Vitamins; Riboflavin Metabolism             |
| SpESTC199       | 167 |   |     | 4-methyl-5(b-hydroxyethyl)-thiazole<br>monophosphate biosynthesis | Metabolism; Metabolism of Cofactors and Vitamins; Thiamine Metabolism               |
| SpESTDH245      | 161 |   |     | 4-methyl-5(b-hydroxyethyl)-thiazole<br>monophosphate biosynthesis | Metabolism; Metabolism of Cofactors and Vitamins; Thiamine Metabolism               |
| SpESTDH050      | 146 |   |     | 3-demethylubiquinone-9 3-methyltransferase                        | Metabolism; Metabolism of Cofactors and Vitamins; Ubiquinone biosynthesis           |
| gSpZar919bT7    | 227 |   | LGT | tripeptide aminopeptidase                                         | Metabolism; Metabolism of Other Amino Acids; Glutathione Metabolism                 |
| SpESTDH279      | 90  |   |     | Cysteine desulfurase (Nifsp in yeast); COG1104                    | Metabolism; Metabolism of Other Amino Acids                                         |
| gSpZap418bT7    | 162 |   |     | 5'-nucleotidase                                                   | Metabolism; Nucleotide Metabolism; Purine Metabolism                                |
| SpESTZap1020    | 202 |   |     | 5'-nucleotidase                                                   | Metabolism; Nucleotide Metabolism; Purine Metabolism                                |
| gSpTor224gT3    | 91  | C |     | 5'-nucleotidase                                                   | Metabolism; Nucleotide Metabolism; Purine Metabolism                                |
| gSpZal311bMF    | 129 | C |     | 5'-nucleotidase                                                   | Metabolism; Nucleotide Metabolism; Purine Metabolism                                |
| gSpZap178gT3    | 160 | C |     | 5'-nucleotidase                                                   | Metabolism; Nucleotide Metabolism; Purine Metabolism                                |
| gSpZap35gT3     | 178 | C |     | 5'-nucleotidase                                                   | Metabolism; Nucleotide Metabolism; Purine Metabolism                                |
| gSpZap46gT3     | 188 | C |     | 5'-nucleotidase                                                   | Metabolism; Nucleotide Metabolism; Purine Metabolism                                |
| gSpZap882bT7    | 145 | C |     | 5'-nucleotidase                                                   | Metabolism; Nucleotide Metabolism; Purine Metabolism                                |
| gSpZap910bT7    | 115 | C |     | 5'-nucleotidase                                                   | Metabolism; Nucleotide Metabolism; Purine Metabolism                                |
| gSpZar313bT7    | 192 | C |     | 5'-nucleotidase                                                   | Metabolism; Nucleotide Metabolism; Purine Metabolism                                |
| Sp6orf1         | 363 | C |     | 5'-nucleotidase                                                   | Metabolism; Nucleotide Metabolism; Purine Metabolism                                |
| SpESTC46        | 180 | C |     | 5'-nucleotidase                                                   | Metabolism; Nucleotide Metabolism; Purine Metabolism                                |
| SpESTZap1999    | 177 | C |     | 5'-nucleotidase                                                   | Metabolism; Nucleotide Metabolism; Purine Metabolism                                |
| SpESTC154       | 173 |   | LGT | adenine phosphoribosyltransferase                                 | Metabolism; Nucleotide Metabolism; Purine Metabolism                                |
| gSpTol186bMF    | 190 |   |     | adenosinetriphosphatase                                           | Metabolism; Nucleotide Metabolism; Purine Metabolism                                |
| gSpTor1000bT7_2 | 130 |   |     | adenosinetriphosphatase                                           | Metabolism; Nucleotide Metabolism; Purine Metabolism                                |
| gSpTor1115gT3   | 187 |   |     | adenosinetriphosphatase                                           | Metabolism; Nucleotide Metabolism; Purine Metabolism                                |
| gSpTor1519bT7   | 218 |   |     | adenosinetriphosphatase                                           | Metabolism; Nucleotide Metabolism; Purine Metabolism                                |
| gSpTor657bT7    | 160 |   |     | adenosinetriphosphatase                                           | Metabolism; Nucleotide Metabolism; Purine Metabolism                                |
| gSpZap189gT3    | 186 |   |     | adenosinetriphosphatase                                           | Metabolism; Nucleotide Metabolism; Purine Metabolism                                |
| gSpZap289gT3    | 199 |   |     | adenosinetriphosphatase                                           | Metabolism; Nucleotide Metabolism; Purine Metabolism                                |
| gSpZap313gT3    | 203 |   |     | adenosinetriphosphatase                                           | Metabolism; Nucleotide Metabolism; Purine Metabolism                                |
| gSpZap56gT3     | 193 |   |     | adenosinetriphosphatase                                           | Metabolism; Nucleotide Metabolism; Purine Metabolism                                |
| gSpZap613bT7    | 108 |   |     | adenosinetriphosphatase                                           | Metabolism; Nucleotide Metabolism; Purine Metabolism                                |
| gSpZap626gT3    | 188 |   |     | adenosinetriphosphatase                                           | Metabolism; Nucleotide Metabolism; Purine Metabolism                                |
| gSpZap748gT3    | 170 |   |     | adenosinetriphosphatase                                           | Metabolism; Nucleotide Metabolism; Purine Metabolism                                |
| gSpZap846bT7    | 187 |   |     | adenosinetriphosphatase                                           | Metabolism; Nucleotide Metabolism; Purine Metabolism                                |
| gSpZap88bT7     | 141 |   |     | adenosinetriphosphatase                                           | Metabolism; Nucleotide Metabolism; Purine Metabolism                                |
| gSpZar174bT7    | 101 |   |     | adenosinetriphosphatase                                           | Metabolism; Nucleotide Metabolism; Purine Metabolism                                |
| gSpZar493gT3    | 160 |   |     | adenosinetriphosphatase                                           | Metabolism; Nucleotide Metabolism; Purine Metabolism                                |
| gSpZar538gT3    | 114 |   |     | adenosinetriphosphatase                                           | Metabolism; Nucleotide Metabolism; Purine Metabolism                                |
| gSpZar597gT3    | 205 |   |     | adenosinetriphosphatase                                           | Metabolism; Nucleotide Metabolism; Purine Metabolism                                |
| gSpZar607gT3    | 119 |   |     | adenosinetriphosphatase                                           | Metabolism; Nucleotide Metabolism; Purine Metabolism                                |
| gSpZar878gT3    | 243 |   |     | adenosinetriphosphatase                                           | Metabolism; Nucleotide Metabolism; Purine Metabolism                                |
| gSpZar999bT7    | 203 |   |     | adenosinetriphosphatase                                           | Metabolism; Nucleotide Metabolism; Purine Metabolism                                |
| SpESTZap140     | 175 |   |     | adenosinetriphosphatase                                           | Metabolism; Nucleotide Metabolism; Purine Metabolism                                |
| gSpZap101gT3    | 148 |   |     | adenylate cyclase                                                 | Metabolism; Nucleotide Metabolism; Purine Metabolism                                |
| SpESTC235       | 203 |   |     | adenylate kinase                                                  | Metabolism; Nucleotide Metabolism; Purine Metabolism                                |
| SpESTZap1939    | 160 |   |     | ADP-ribose pyrophosphatase                                        | Metabolism; Nucleotide Metabolism; Purine Metabolism                                |
| SpESTC251       | 228 |   | LGT | deoxyguanosine kinase                                             | Metabolism; Nucleotide Metabolism; Purine Metabolism                                |
| SpESTC254       | 207 |   | LGT | deoxyguanosine kinase                                             | Metabolism; Nucleotide Metabolism; Purine Metabolism                                |
| gSpTor745bT7    | 188 |   | TM  | guanylate cyclase                                                 | Metabolism; Nucleotide Metabolism; Purine Metabolism                                |
| SpESTC75        | 196 |   |     | hypoxanthine phosphoribosyltransferase                            | Metabolism; Nucleotide Metabolism; Purine Metabolism                                |
| gSpTor125bT7    | 164 |   | LGT | myosin ATPase                                                     | Metabolism; Nucleotide Metabolism; Purine Metabolism                                |
| SpESTC48        | 236 |   |     | myosin ATPase                                                     | Metabolism; Nucleotide Metabolism; Purine Metabolism                                |
| gSpZar989gT3    | 245 |   |     | nucleoside-diphosphate kinase                                     | Metabolism; Nucleotide Metabolism; Purine Metabolism                                |
| SpESTC203       | 147 |   |     | nucleoside-diphosphate kinase                                     | Metabolism; Nucleotide Metabolism; Purine Metabolism                                |
| SpESTZap1122    | 132 |   |     | nucleoside-triphosphate pyrophosphatase                           | Metabolism; Nucleotide Metabolism; Purine Metabolism                                |
| SpESTZap518     | 214 |   |     | phosphoribosylformylglycinamidase cyclo-ligase                    | Metabolism; Nucleotide Metabolism; Purine Metabolism                                |
| gSpTor95gT3     | 138 |   |     | polyribonucleotide nucleotidyltransferase                         | Metabolism; Nucleotide Metabolism; Purine Metabolism                                |
| 27982526        | 517 |   | LGT | CTP synthase                                                      | Metabolism; Nucleotide Metabolism; Pyrimidine Metabolism                            |
| gSpTor189bT7    | 84  |   |     | CTP synthase                                                      | Metabolism; Nucleotide Metabolism; Pyrimidine Metabolism                            |
| gSpZap129bT7    | 165 |   |     | CTP synthase                                                      | Metabolism; Nucleotide Metabolism; Pyrimidine Metabolism                            |
| SpESTZap137     | 127 |   |     | cytidine deaminase                                                | Metabolism; Nucleotide Metabolism; Pyrimidine Metabolism                            |
| SpESTC213       | 186 |   |     | cytidylate kinase                                                 | Metabolism; Nucleotide Metabolism; Pyrimidine Metabolism                            |
| gSpZar448gT3    | 186 |   |     | pseudouridylate synthase                                          | Metabolism; Nucleotide Metabolism; Pyrimidine Metabolism                            |
| SpESTZap864     | 182 |   |     | pseudouridylate synthase                                          | Metabolism; Nucleotide Metabolism; Pyrimidine Metabolism                            |
| SpESTC217       | 305 |   |     | thioredoxin reductase (NADPH)                                     | Metabolism; Nucleotide Metabolism; Pyrimidine Metabolism                            |
| Sp5orf1         | 616 |   |     | uridine kinase                                                    | Metabolism; Nucleotide Metabolism; Pyrimidine Metabolism                            |
| SpESTC192       | 220 |   |     | uridine kinase                                                    | Metabolism; Nucleotide Metabolism; Pyrimidine Metabolism                            |
| 27984028        | 401 |   | LGT | A-type flavoprotein                                               | Metabolism; unclassified                                                            |
| SpESTZap2025    | 189 |   | LGT | A-type flavoprotein                                               | Metabolism; unclassified                                                            |
| SpESTC196       | 228 |   | LGT | carotenoid isomerase                                              | Metabolism; unclassified                                                            |
| gSpZap998gT3    | 191 |   | LGT | carotenoid isomerase                                              | Metabolism; unclassified                                                            |
| gSpTor315gT3    | 210 |   |     | deoxyhypusine synthase                                            | Metabolism; unclassified                                                            |
| SpESTC267       | 192 |   | LGT | rubrythrin                                                        | Metabolism; unclassified                                                            |
| SpESTC282       | 210 |   | LGT | rubrythrin                                                        | Metabolism; unclassified                                                            |

|                    |     |    |    |                                |  |
|--------------------|-----|----|----|--------------------------------|--|
| 422 GSSs           |     | 47 | 17 | conserved hypothetical protein |  |
| 105 GSSs           | 105 | 18 |    | conserved hypothetical protein |  |
| 1 GSS              |     |    |    | conserved hypothetical protein |  |
| 12 ORFs in contigs |     | 4  |    | conserved hypothetical protein |  |
| 3 ORFs in contigs  | 3   | 2  |    | conserved hypothetical protein |  |
| 173 ESTs           |     | 28 |    | conserved hypothetical protein |  |
| 14 ESTs            | 14  | 1  |    | conserved hypothetical protein |  |
| 2 ESTs             |     |    |    | conserved hypothetical protein |  |
| 13 ORFs in contigs |     | 4  |    | hypothetical protein           |  |

- 1) Indicates the length of the putative amino acid sequence.
- 2) Indicates cysteine-rich (>10%) proteins that were excluded from the phylogenomic analysis.
- 3) Indicates proteins with one or more transmembrane (TM) helices predicted by TMHMM server version 2.0 (<http://www.cbs.dtu.dk/services/TMHMM/>).
- 4) Indicates proteins encoded by genes with a putative LGT origin (see Additional files 3-6 for details).
