# Supplementary material for: A genomic survey of the fish parasite Spironucleus salmonicida indicates genomic plasticity among diplomonads and significant lateral gene transfer in eukaryote genome evolution
Source: BMC Genomics. 2007 Feb 14;8:51. doi: 10.1186/1471-2164-8-51 (PMC1805757; doi:10.1186/1471-2164-8-51)
Supplement: Additional file 3 — A table showing the genes putatively involved in LGT events. [file 1471-2164-8-51-S3.pdf]

# A genomic survey of the fish parasite *Spironucleus salmonicida* indicates genomic plasticity among diplomonads and significant lateral gene transfer in eukaryote genome evolution

Jan O. Andersson, Åsa M. Sjögren, David S. Horner, Colleen A. Murphy, Patricia L. Dyal, Staffan G. Svärd, John M. Logsdon, Jr., Mark A. Ragan, Robert P. Hirt, and Andrew J. Roger

## Additional file 3

Candidate LGT genes in the *Spironucleus salmonicida* genome survey.

| Clone                    | Protein                                                      | Classification                                                                                              | Tree# <sup>3</sup> | #aa positions | Monophyletic diplomonads | Monophyletic diplomonads and parabasalids | Eukaryote-to-eukaryote LGT event <sup>6</sup> |
|--------------------------|--------------------------------------------------------------|-------------------------------------------------------------------------------------------------------------|--------------------|---------------|--------------------------|-------------------------------------------|-----------------------------------------------|
| SpESTZap1389             | drug:H+ antiporter-2, DHA2 family                            | Environmental information processing; membrane transport; major facilitator superfamily (MFS)               | 1                  | 170           | +                        |                                           |                                               |
| SpESTC18 <sup>1</sup>    | membrane protease subunit HflK                               | Genetic information processing; folding, sorting and degradation; protein folding and associated processing | 2                  | 160           | -                        |                                           | DD                                            |
| gZar958bT7 <sup>1</sup>  | membrane protease subunit HflK                               | Genetic information processing; folding, sorting and degradation; protein folding and associated processing | 3                  | 125           | -                        |                                           | DD                                            |
| SpESTC43                 | DNA glycosylase                                              | Genetic information processing; replication and repair; other replication, recombination and repair factors | 4                  | 165           | +                        |                                           | DD                                            |
| SpESTZap1340             | tRNA (5-methylaminomethyl-2-thiouridylate)-methyltransferase | Genetic information processing; unclassified                                                                | 5                  | 107           | -                        |                                           |                                               |
| 27982008                 | alanyl-tRNA synthetase                                       | Metabolism; amino acid metabolism; alanine and aspartate metabolism                                         | 6                  | 451           | + <sup>4</sup>           | + <sup>5</sup>                            | EH <sup>5</sup>                               |
| SpESTC149 <sup>1</sup>   | aminoacylhistidine dipeptidase                               | Metabolism; amino acid metabolism; alanine and aspartate metabolism                                         | 7                  | 247           | +                        | +                                         |                                               |
| SpESTDH287 <sup>1</sup>  | aminoacylhistidine dipeptidase                               | Metabolism; amino acid metabolism; alanine and aspartate metabolism                                         | 7                  | 247           | +                        | +                                         |                                               |
| SpESTZap149 <sup>1</sup> | aminoacylhistidine dipeptidase                               | Metabolism; amino acid metabolism; alanine and aspartate metabolism                                         | 7                  | 247           | +                        | +                                         |                                               |
| SpESTC31                 | 5'-methylthioadenosine nucleosidase                          | Metabolism; amino acid metabolism; arginine and proline metabolism                                          | 8                  | 168           | +                        |                                           |                                               |
| SpESTC83                 | arginine deiminase                                           | Metabolism; amino acid metabolism; arginine and proline metabolism                                          | 9                  | 356           | +                        | +                                         | DD                                            |
| SpESTC221                | ornithine carbamoyltransferase                               | Metabolism; amino acid metabolism; arginine and proline metabolism                                          | 10                 | 303           | +                        | +                                         |                                               |
| 27981826                 | prolyl-tRNA synthetase                                       | Metabolism; amino acid metabolism; arginine and proline metabolism                                          | 11                 | 175           | +                        | +                                         |                                               |
| gZar602gT3 <sup>1</sup>  | sarcosine oxidase                                            | Metabolism; amino acid metabolism; glycine, serine and threonine metabolism                                 | 12                 | 218           | -                        |                                           | EH                                            |
| gZap30gT3 <sup>1</sup>   | sarcosine oxidase                                            | Metabolism; amino acid metabolism; glycine, serine and threonine metabolism                                 | 12                 | 218           | -                        |                                           | EH                                            |
| 27982357                 | threonine dehydratase                                        | Metabolism; amino acid metabolism; glycine, serine and threonine metabolism                                 | 13                 | 269           | + <sup>4</sup>           | +                                         |                                               |
| SpESTZap946              | histidinol-phosphatase (PHP family)                          | Metabolism; amino acid metabolism; histidine metabolism                                                     | 14                 | 113           | +                        |                                           |                                               |
| gZap84gT3 <sup>1</sup>   | alcohol dehydrogenase                                        | Metabolism; carbohydrate metabolism; glycolysis / gluconeogenesis                                           | 15                 | 121           | +                        |                                           | EH                                            |
| SpESTZap588 <sup>1</sup> | alcohol dehydrogenase                                        | Metabolism; carbohydrate metabolism; glycolysis / gluconeogenesis                                           | 16                 | 147           | +                        |                                           | EH                                            |
| 27983189                 | alcohol dehydrogenase                                        | Metabolism; carbohydrate metabolism; glycolysis / gluconeogenesis                                           | 16                 | 147           | +                        |                                           |                                               |
| 27983404                 | alcohol dehydrogenase                                        | Metabolism; carbohydrate metabolism; glycolysis / gluconeogenesis                                           | 16                 | 147           | +                        |                                           |                                               |
| SpESTDH325               | alcohol dehydrogenase                                        | Metabolism; carbohydrate metabolism; glycolysis / gluconeogenesis                                           | 17                 | 223           | -                        |                                           |                                               |

|                           |                                                                               |                                                                              |    |     |   |              |
|---------------------------|-------------------------------------------------------------------------------|------------------------------------------------------------------------------|----|-----|---|--------------|
| 23266714                  | fructose-bisphosphate aldolase, class II                                      | Metabolism; carbohydrate metabolism; glycolysis / gluconeogenesis            | 18 | 300 | + |              |
| SpESTZap404               | glucokinase                                                                   | Metabolism; carbohydrate metabolism; glycolysis / gluconeogenesis            | 19 | 192 | + |              |
| 18030018                  | glucose-6-phosphate isomerase                                                 | Metabolism; carbohydrate metabolism; glycolysis / gluconeogenesis            | 20 | 412 | + | +            |
| gTol047bMF                | phosphoglycerate mutase                                                       | Metabolism; carbohydrate metabolism; glycolysis / gluconeogenesis            | 21 | 184 | + |              |
| SpESTC275                 | pyruvate kinase                                                               | Metabolism; carbohydrate metabolism; glycolysis / gluconeogenesis            | 22 | 205 | + | <sup>4</sup> |
| gTor983gT3                | phosphoglycolate phosphatase                                                  | Metabolism; carbohydrate metabolism; glyoxylate and dicarboxylate metabolism | 23 | 116 | - |              |
| SpESTC23                  | ribose 5-phosphate isomerase B                                                | Metabolism; carbohydrate metabolism; pentose phosphate pathway               | 24 | 136 | + | +            |
| SpESTZap360               | transketolase                                                                 | Metabolism; carbohydrate metabolism; pentose phosphate pathway               | 25 | 196 | + |              |
| gZap797bT7                | acetyl-CoA synthetase (ADP-forming)                                           | Metabolism; carbohydrate metabolism; pyruvate metabolism                     | 26 | 121 | + | +            |
| SpESTZap1028 <sup>1</sup> | hydroxyacylglutathione hydrolase                                              | Metabolism; carbohydrate metabolism; pyruvate metabolism                     | 27 | 164 | + |              |
| gZap472bT7 <sup>1</sup>   | hydroxyacylglutathione hydrolase                                              | Metabolism; carbohydrate metabolism; pyruvate metabolism                     | 27 | 164 | + |              |
| SpESTC94                  | putative pyruvate-flavodoxin oxidoreductase                                   | Metabolism; carbohydrate metabolism; pyruvate metabolism                     | 28 | 167 | + | MB           |
| gZap510gT3                | glycogen(starch) synthase                                                     | Metabolism; carbohydrate metabolism; starch and sucrose metabolism           | 29 | 111 | + |              |
| SpESTC239                 | carbamate kinase                                                              | Metabolism; energy metabolism; nitrogen metabolism                           | 30 | 273 | + |              |
| gZap126bT7 <sup>2</sup>   | cystathionine beta-lyase                                                      | Metabolism; energy metabolism; nitrogen metabolism                           | 31 | 157 | - |              |
| gZap126gT3 <sup>2</sup>   | cystathionine beta-lyase                                                      | Metabolism; energy metabolism; nitrogen metabolism                           | 32 | 182 | - |              |
| SpESTC259 <sup>1</sup>    | cytochrome c biogenesis protein CcmG, thiol:disulfide interchangeprotein DsbE | Metabolism; energy metabolism; nitrogen metabolism                           | 33 | 110 | + |              |
| 20530910                  | glutamate synthase (NADPH) small chain                                        | Metabolism; energy metabolism; nitrogen metabolism                           | 34 | 243 | + |              |
| 27983817                  | hydroxylamine reductase                                                       | Metabolism; energy metabolism; nitrogen metabolism                           | 35 | 471 | + |              |
| gTol313bMF <sup>2</sup>   | tryptophanase                                                                 | Metabolism; energy metabolism; nitrogen metabolism                           | 36 | 160 | - |              |
| SpESTC204 <sup>2</sup>    | tryptophanase                                                                 | Metabolism; energy metabolism; nitrogen metabolism                           | 37 | 164 | - |              |
| gZal229bMF                | NADH dehydrogenase                                                            | Metabolism; energy metabolism; oxidative phosphorylation                     | 38 | 105 | + | <sup>4</sup> |
| SpESTC219                 | NADH dehydrogenase                                                            | Metabolism; energy metabolism; oxidative phosphorylation                     | 39 | 315 | + | <sup>4</sup> |
| SpESTDH113                | NADH dehydrogenase                                                            | Metabolism; energy metabolism; oxidative phosphorylation                     | 40 | 155 | - |              |
| 11127702 <sup>1</sup>     | NADH dehydrogenase                                                            | Metabolism; energy metabolism; oxidative phosphorylation                     | 41 | 303 | + | EH           |
| gTor1143gT3 <sup>1</sup>  | NADH dehydrogenase                                                            | Metabolism; energy metabolism; oxidative phosphorylation                     | 42 | 155 | + | EH           |
| SpESTC115 <sup>1</sup>    | cysteine synthase                                                             | Metabolism; energy metabolism; sulfur metabolism                             | 43 | 200 | - |              |
| SpESTZap1933 <sup>1</sup> | cysteine synthase                                                             | Metabolism; energy metabolism; sulfur metabolism                             | 44 | 214 | - |              |
| gZap471gT3                | fatty acid desaturase                                                         | Metabolism; lipid metabolism; androgen and estrogen metabolism               | 45 | 143 | - |              |
| SpESTZap110               | NAD(P)H dehydrogenase (quinone)                                               | Metabolism; lipid metabolism; biosynthesis of steroids                       | 46 | 127 | + |              |
| 27983595                  | long-chain fatty-acid-CoA ligase                                              | Metabolism; lipid metabolism; fatty acid metabolism                          | 47 | 682 | + |              |
| SpESTZap2148              | glycerol-3-phosphate dehydrogenase                                            | Metabolism; lipid metabolism; glycerophospholipid metabolism                 | 48 | 185 | + | EH           |
| gTor927gT3                | phosphatidylserine synthase                                                   | Metabolism; lipid metabolism; glycerophospholipid metabolism                 | 49 | 168 | + |              |
| gZar919bT7                | tripeptide aminopeptidase                                                     | Metabolism; metabolism of other amino acids; glutathione metabolism          | 50 | 214 | - | EH           |
| SpESTC154                 | adenine phosphoribosyltransferase                                             | Metabolism; nucleotide metabolism; purine metabolism                         | 51 | 154 | + |              |
| SpESTC254                 | deoxyguanosine kinase                                                         | Metabolism; nucleotide metabolism; purine metabolism                         | 52 | 182 | + | DD           |
| SpESTC251                 | deoxyguanosine kinase                                                         | Metabolism; nucleotide metabolism; purine metabolism                         | 52 | 182 | + | DD           |
| gTor125bT7                | myosin ATPase                                                                 | Metabolism; nucleotide metabolism; purine metabolism                         | 53 | 135 | + |              |
| 27982526                  | CTP synthase                                                                  | Metabolism; nucleotide metabolism; pyrimidine metabolism                     | 54 | 511 | - |              |
| 27984028 <sup>1</sup>     | A-type flavoprotein                                                           | Metabolism; unclassified                                                     | 55 | 383 | + | +            |
| SpESTZap2025 <sup>1</sup> | A-type flavoprotein                                                           | Metabolism; unclassified                                                     | 56 | 168 | + | +            |
| SpESTC196 <sup>1</sup>    | carotenoid isomerase                                                          | Metabolism; unclassified                                                     | 57 | 211 | - |              |
| gZap998gT3 <sup>1</sup>   | carotenoid isomerase                                                          | Metabolism; unclassified                                                     | 57 | 211 | - |              |
| SpESTC282 <sup>1</sup>    | rubrerythrin                                                                  | Metabolism; unclassified                                                     | 58 | 173 | - |              |
| SpESTC267 <sup>1</sup>    | rubrerythrin                                                                  | Metabolism; unclassified                                                     | 58 | 173 | - |              |
| gTor1213bT7               | conserved hypothetical protein                                                |                                                                              | 59 | 144 | - | GZ           |
| gTor541gT3                | conserved hypothetical protein                                                |                                                                              | 60 | 199 | + |              |
| gTor565bT7                | conserved hypothetical protein                                                |                                                                              | 61 | 160 | + |              |

|                           |                                |    |     |   |   |
|---------------------------|--------------------------------|----|-----|---|---|
| gTor916gT3                | conserved hypothetical protein | 62 | 175 | + | + |
| gTor930bT7                | conserved hypothetical protein | 63 | 163 | + |   |
| gZap260bT7                | conserved hypothetical protein | 64 | 123 | - |   |
| gZap950bT7                | conserved hypothetical protein | 65 | 111 | + |   |
| gZar587bT72               | conserved hypothetical protein | 66 | 124 | - |   |
| gZar847bT7                | conserved hypothetical protein | 67 | 137 | + | + |
| gZar96bT7                 | conserved hypothetical protein | 68 | 147 | - |   |
| gZar978gT3 <sup>1</sup>   | conserved hypothetical protein | 69 | 185 | - |   |
| gZar789bT7 <sup>1</sup>   | conserved hypothetical protein | 69 | 185 | - |   |
| Sp11orf4                  | conserved hypothetical protein | 70 | 586 | + |   |
| SpESTZap1004              | conserved hypothetical protein | 71 | 197 | + |   |
| SpESTZap1248              | conserved hypothetical protein | 72 | 118 | + |   |
| SpESTZap1299 <sup>1</sup> | conserved hypothetical protein | 33 | 110 | + |   |
| SpESTZap1913 <sup>1</sup> | conserved hypothetical protein | 33 | 110 | + |   |

<sup>1</sup>) The phylogenetic analyses of these genes indicate that they likely have undergone duplications after the putative LGT events.

<sup>2</sup>) These pairs of sequences with identical annotations correspond to different parts of the protein and could represent the same gene in the genome.

<sup>3</sup>) Phylogenetic trees for all candidate LGT genes are shown in Additional files 4-6.

<sup>4</sup>) *G. lamblia* homologs for these proteins are present in the similarity searches and most likely are the closest relatives to the *S. salmonicida* sequences. However, the *G. lamblia* homologs are absent from the phylogenetic trees listed since the automated generation of datasets [1] reached the maximum number of sequences to include (200) and only selected a subset of the available homologous sequences in the databases.

<sup>5</sup>) A previous phylogenetic study of alanyl tRNA synthetase has both shown diplomonads and parabasalids to be monophyletic, and gene transfers between eukaryotic lineages [2]. These cases are not observed in the presented tree since the *Trichomonas*, *Entamoeba*, and ciliate homologs were excluded due to the reasons outlined above.

<sup>6</sup>) The putative recipient and/or donor eukaryotic lineages are indicted by DD (*Dictyostelium discoideum*), EH (*Entamoeba histolytica*), GZ (*Gibberella zeae*), and MB (*Mastigamoeba balamuthi*).

## References

1. Frickey T, Lupas AN: **PhyloGenie: automated phylome generation and analysis**. *Nucleic Acids Res* 2004, **32**:5231-5238.
2. Andersson JO, Sarchfield SW, Roger AJ: **Gene transfers from Nanoarchaeota to an ancestor of diplomonads and parabasalids**. *Mol Biol Evol* 2005, **22**:85-90.
